# Supplementary material
Source: Research Square preprint supplement (doi:10.21203/rs.3.rs-8597698/v1)
Supplement: Supplementary file 1 [file 04834655cb02b18186f1f5e2.docx]

**Supplementary Table 6: Primers used for constructions or sequences**

|  | **Primers** |
| --- | --- |
| pAAV-CaMKII-DIO-ActProX-ID | Forward 5'- acgaagttatggcgcgccctaactagttgcgtaatccggtacat -3'  Reverse 5'- acgaagttatgctagcGCCACCatgctgtgctgtatgagaagaaccaaacaggttgaaaagaatgatgaggaccaaaagatcgccatgaaagacaatactgtgcctctgaa -3' |
| pAAV-CaMKII- DIO-ActProX-ID  Sequence primer | 5'- CATAGCGTAAAAGGAGCAACA -3' |
| pAAV-CAG -DIO-axon mCherry | Forward 5'- TACCTTAaagCTCGAGTTACTTGTACAGCTCGTCCATGCCGCCGGTGGA -3'  Reverse 5'- ACCATTTAAATGGATCCTTGCCACCatgctgtgctgtatgagaagaa-3' |
| pAAV-CAG -DIO-axon mCherry  Sequence primer 1 | 5'-CTGCTAACCATGTTCATGCCTTCTTC-3' |
| pAAV-CAG -DIO-axon mCherry  Sequence primer 2 | 5'-gcagaatggtagctggattg-3' |
| HiUGE  Sequence primer | 5'-aaaaacgagatcacatggtgttgtt-3' |
| pAAV-U6-3xsgRNA(TSAN7)_hSyn-mCherry-KASH-bGH Sequence primer 1 | 5'- ATGCGCAATTTGGGGAATGGGGGTT -3' |
| pAAV-U6-3xsgRNA(TSPAN7)_hSyn-mCherry-KASH-bGH Sequence primer 2 | 5'-GACTATCATATGCTTACCGT-3' |
| pAAV-U6-3xsgRNA(Scrambles)_hSyn-mCherry-KASH-bGH Sequence primer 1 | 5'- ATGCGCAATTTGGGGAATGGGGGTT-3' |
| pAAV-U6-3xsgRNA(Scrambles)_hSyn-mCherry-KASH-bGH Sequence primer 2 | 5'-GACTATCATATGCTTACCGT-3' |
| pAAV-U6-3xsgRNA(CPLX2)_hSyn-mCherry-KASH-bGH Sequence primer 1 | 5'- ATGCGCAATTTGGGGAATGGGGGTT -3' |
| pAAV-U6-3xsgRNA(CPLX2)_hSyn-mCherry-KASH-bGH Sequence primer 2 | 5'-GACTATCATATGCTTACCGT-3' |
| pAAV-CaMKII-hTSPAN7 P172H | Forward 5'-GCCCCTAGTTCTGGGGGCAGCGGGGCTAGCctcgaggccaccATGGCATCGAGGAGAATG-3'  Reverse 5'-CCAGAGGTTGATTAATCGTCAGTCAGATTTACACCATCTCATACTGATTGGCC-3' |
| pAAV-CaMKII-hTSPAN7 P172H  Sequence primer | 5'-AAGCAATAGCATGATACAAAGGCATTAAAGCA-3' |
| pAAV-CaMKII-hTSPAN7 | Forward 5'- GCCCCTAGTTCTGGGGGCAGCGGGGCTAGCctcgaggccaccATGGCATCGAGGAGAATG-3'  Reverse 5'-CCAGAGGTTGATTAATCGTCAGTCAGATTTACACCATCTCATACTGATTGGCC-3' |
| pAAV-CaMKII-hTSPAN7  Sequence primer | 5'-AAGCAATAGCATGATACAAAGGCATTAAAGCA-3' |
| pAAV-CaMKII-CPLX2 | Forward 5'- CTGGGGGCAGCGGGGCTAGCctcgaggccaccATGGAACAAAAACTTATTAGCGAAGAAG-3'  Reverse 5'-GAGGTTGATTAATCGTCAGTCAGATTTACTTCTTGAACATGTCCTGCAGCG-3' |
| pAAV-CaMKII-CPLX2  Sequence primer | 5'-AAGCAATAGCATGATACAAAGGCATTAAAGCA-3' |
| pAAV-CaMKII-TSPAN7-TurboID | Forward 5'- GGGCAGCGGGGCTAGCGCCACCATGGCATCGAGGAGAATGGAGACCAAACCTGTGATAACCTG-3'  Reverse 5'-tcgtaagggtaGTCGACaagcttttcggcagaccgcagactgatttct-3' |
| pAAV-CaMKII-TSPAN7-TurboID  Sequence primer 1 | 5'-TTCTCCGTTTGCACTCAGGAGCA-3' |
| pAAV-CaMKII-TSPAN7-TurboID  Sequence primer 2 | 5'-CTGGCATTTCTGGATTTGTGTTTCG-3' |
| pAAV-CaMKII-TSPAN7-TurboID  Sequence primer 3 | 5'-TGCTGGCTTGCACCGGTatgaaagacaatactgtgcctctgaagctgat-3' |
| pAAV-CaMKII-TSPAN7-TurboID  Sequence primer 4 | 5'-tgcctgctgatattctgcaatgcaagcat-3' |
| pAAV-CaMKII-TSPAN7-TurboID  Sequence primer 5 | 5'-atcagcgtagcggccagagtattcctgt-3' |
| pAAV-CaMKII-TSPAN7-TurboID  Sequence primer 6 | 5'-AAGCAATAGCATGATACAAAGGCATTAAAGCA-3' |
