# Supplementary material
Source: Research Square preprint supplement (doi:10.21203/rs.3.rs-8597698/v1)
Supplement: Supplementary file 4 [file 3aa588f617c5332e40299d57.xlsx]

## Sheet: Sheet1
DO terms for focused neurological diseases
DOID	name
DOID:1561	cognitive disorder
DOID:2030	anxiety disorder
DOID:6088	acute stress disorder
DOID:6950	combat disorder
DOID:14320	generalized anxiety disorder
DOID:14320	generalized anxiety disorder
DOID:4964	neurotic disorder
DOID:10933	obsessive-compulsive disorder
DOID:594	panic disorder
DOID:591	phobic disorder
DOID:593	agoraphobia
DOID:11257	social phobia
DOID:599	specific phobia
DOID:600	animal phobia
DOID:605	flying phobia
DOID:60048	nosophobia
DOID:603	AIDS phobia
DOID:602	cancerophobia
DOID:2055	post-traumatic stress disorder
DOID:10685	separation anxiety disorder
DOID:1307	dementia
DOID:9255	frontotemporal dementia
DOID:111227	chromosome 3-linked frontotemporal dementia
DOID:81392	corticobasal degeneration syndrome
DOID:60672	Grn-related frontotemporal lobar degeneration with Tdp43 inclusions
DOID:11870	Pick's disease
DOID:81388	primary progressive aphasia
DOID:81389	logopenic progressive aphasia
DOID:81390	progressive non-fluent aphasia
DOID:81391	semantic dementia
DOID:12217	Lewy body dementia
DOID:8725	vascular dementia
DOID:80832	mild cognitive impairment
DOID:3324	mood disorder
DOID:12294	atypical depressive disorder
DOID:3312	bipolar disorder
DOID:14042	bipolar I disorder
DOID:60166	bipolar ll disorder
DOID:845	cyclothymic disorder
DOID:1596	depressive disorder
DOID:1470	major depressive disorder
DOID:1595	melancholic depression
DOID:9478	postpartum depression
DOID:60167	seasonal affective disorder
DOID:12139	dysthymic disorder
DOID:2468	psychotic disorder
DOID:778	delusional disorder
DOID:6680	Capgras syndrome
DOID:5418	schizoaffective disorder
DOID:5419	schizophrenia
DOID:1229	paranoid schizophrenia
DOID:70077	schizophrenia 1
DOID:70086	schizophrenia 10
DOID:70087	schizophrenia 11
DOID:70088	schizophrenia 12
DOID:70089	schizophrenia 13
DOID:70090	schizophrenia 14
DOID:70091	schizophrenia 15
DOID:70092	schizophrenia 16
DOID:70093	schizophrenia 18
DOID:80281	schizophrenia 19
DOID:70078	schizophrenia 2
DOID:70079	schizophrenia 3
DOID:70080	schizophrenia 4
DOID:70081	schizophrenia 5
DOID:70082	schizophrenia 6
DOID:70083	schizophrenia 7
DOID:70084	schizophrenia 8
DOID:70085	schizophrenia 9
DOID:11328	schizophreniform disorder
DOID:80831	subjective cognitive decline
DOID:60041	autism spectrum disorder
DOID:50432	Asperger syndrome
DOID:60042	atypical autism
DOID:12849	autistic disorder
DOID:1094	attention deficit hyperactivity disorder
DOID:1059	intellectual disability
DOID:60307	autosomal dominant intellectual developmental disorder
DOID:70062	Arboleda-Tham syndrome
DOID:70031	autosomal dominant intellectual developmental disorder 1
DOID:70040	autosomal dominant intellectual developmental disorder 10
DOID:70041	autosomal dominant intellectual developmental disorder 11
DOID:70043	autosomal dominant intellectual developmental disorder 13
DOID:70049	autosomal dominant intellectual developmental disorder 19
DOID:70032	autosomal dominant intellectual developmental disorder 2
DOID:70051	autosomal dominant intellectual developmental disorder 21
DOID:70052	autosomal dominant intellectual developmental disorder 22
DOID:70053	autosomal dominant intellectual developmental disorder 23
DOID:70056	autosomal dominant intellectual developmental disorder 26
DOID:70059	autosomal dominant intellectual developmental disorder 29
DOID:70033	autosomal dominant intellectual developmental disorder 3
DOID:70060	autosomal dominant intellectual developmental disorder 30
DOID:70061	autosomal dominant intellectual developmental disorder 31
DOID:70063	autosomal dominant intellectual developmental disorder 33
DOID:70064	autosomal dominant intellectual developmental disorder 34
DOID:70065	autosomal dominant intellectual developmental disorder 35
DOID:70066	autosomal dominant intellectual developmental disorder 36
DOID:70068	autosomal dominant intellectual developmental disorder 38
DOID:70069	autosomal dominant intellectual developmental disorder 39
DOID:70034	autosomal dominant intellectual developmental disorder 4
DOID:70070	autosomal dominant intellectual developmental disorder 40
DOID:70071	autosomal dominant intellectual developmental disorder 41
DOID:70072	autosomal dominant intellectual developmental disorder 42
DOID:70073	autosomal dominant intellectual developmental disorder 43
DOID:70074	autosomal dominant intellectual developmental disorder 44
DOID:80236	autosomal dominant intellectual developmental disorder 45
DOID:80237	autosomal dominant intellectual developmental disorder 46
DOID:80238	autosomal dominant intellectual developmental disorder 47
DOID:80235	autosomal dominant intellectual developmental disorder 48
DOID:70035	autosomal dominant intellectual developmental disorder 5
DOID:80233	autosomal dominant intellectual developmental disorder 50
DOID:80232	autosomal dominant intellectual developmental disorder 51
DOID:80231	autosomal dominant intellectual developmental disorder 52
DOID:80228	autosomal dominant intellectual developmental disorder 53
DOID:80230	autosomal dominant intellectual developmental disorder 54
DOID:80227	autosomal dominant intellectual developmental disorder 55
DOID:80226	autosomal dominant intellectual developmental disorder 56
DOID:70036	autosomal dominant intellectual developmental disorder 6
DOID:70037	autosomal dominant intellectual developmental disorder 7
DOID:70038	autosomal dominant intellectual developmental disorder 8
DOID:80234	Clark-Baraitser syndrome
DOID:1925	Coffin-Siris syndrome
DOID:70042	Coffin-Siris syndrome 1
DOID:112371	Coffin-Siris syndrome 10
DOID:112372	Coffin-Siris syndrome 11
DOID:112370	Coffin-Siris syndrome 12
DOID:70044	Coffin-Siris syndrome 2
DOID:70045	Coffin-Siris syndrome 3
DOID:70046	Coffin-Siris syndrome 4
DOID:112368	Coffin-Siris syndrome 5
DOID:80297	Coffin-Siris syndrome 6
DOID:112369	Coffin-Siris syndrome 7
DOID:112367	Coffin-Siris syndrome 8
DOID:70057	Coffin-Siris syndrome 9
DOID:60933	developmental delay, dysmorphic facies, and brain anomalies
DOID:70420	developmental delay, hypotonia, and impaired language
DOID:70048	GAND syndrome
DOID:70058	Helsmoortel-Van Der Aa Syndrome
DOID:81430	intellectual developmental disorder with autistic features and language delay, with or without seizures
DOID:81262	intellectual developmental disorder with hypotonia, impaired speech, and dysmorphic facies
DOID:70416	Luo-Schoch-Yamamoto syndrome
DOID:70039	NESCAV syndrome
DOID:70513	neurodevelopmental disorder with dysmorphic facies and behavioral abnormalities
DOID:70514	neurodevelopmental disorder with dysmorphic facies and distal limb anomalies
DOID:70469	neurodevelopmental disorder with dysmorphic facies and thin corpus callosum
DOID:81275	neurodevelopmental disorder with eye movement abnormalities and ataxia
DOID:70536	neurodevelopmental disorder with hypotonia, language delay, and skeletal defects with or without seizures
DOID:70050	neurodevelopmental disorder with hypotonia, stereotypic hand movements, and impaired language
DOID:70417	neurodevelopmental disorder with speech impairment and dysmorphic facies
DOID:81362	Pierpont syndrome
DOID:70047	Schuurs-Hoeijmakers Syndrome
DOID:70529	Sifrim-Hitz-Weiss syndrome
DOID:70054	Vulto-van Silfout-de Vries syndrome
DOID:70067	White-Sutton syndrome
DOID:70055	Xia-Gibbs Syndrome
DOID:60308	autosomal recessive intellectual developmental disorder
DOID:81177	autosomal recessive intellectual developmental disorder 1
DOID:81185	autosomal recessive intellectual developmental disorder 10/20
DOID:81186	autosomal recessive intellectual developmental disorder 11
DOID:81180	autosomal recessive intellectual developmental disorder 12
DOID:81098	autosomal recessive intellectual developmental disorder 13
DOID:81188	autosomal recessive intellectual developmental disorder 14
DOID:81189	autosomal recessive intellectual developmental disorder 16
DOID:81190	autosomal recessive intellectual developmental disorder 18
DOID:81178	autosomal recessive intellectual developmental disorder 2
DOID:81196	autosomal recessive intellectual developmental disorder 23
DOID:81197	autosomal recessive intellectual developmental disorder 24
DOID:81198	autosomal recessive intellectual developmental disorder 25
DOID:81193	autosomal recessive intellectual developmental disorder 27
DOID:81199	autosomal recessive intellectual developmental disorder 28
DOID:81192	autosomal recessive intellectual developmental disorder 29
DOID:81179	autosomal recessive intellectual developmental disorder 3
DOID:81195	autosomal recessive intellectual developmental disorder 30
DOID:81191	autosomal recessive intellectual developmental disorder 31
DOID:81194	autosomal recessive intellectual developmental disorder 33
DOID:81200	autosomal recessive intellectual developmental disorder 34
DOID:81201	autosomal recessive intellectual developmental disorder 35
DOID:81202	autosomal recessive intellectual developmental disorder 37
DOID:81203	autosomal recessive intellectual developmental disorder 38
DOID:81204	autosomal recessive intellectual developmental disorder 39
DOID:81187	autosomal recessive intellectual developmental disorder 4
DOID:81205	autosomal recessive intellectual developmental disorder 40
DOID:81206	autosomal recessive intellectual developmental disorder 41
DOID:81207	autosomal recessive intellectual developmental disorder 43
DOID:81208	autosomal recessive intellectual developmental disorder 44
DOID:81209	autosomal recessive intellectual developmental disorder 45
DOID:81210	autosomal recessive intellectual developmental disorder 46
DOID:81211	autosomal recessive intellectual developmental disorder 47
DOID:81212	autosomal recessive intellectual developmental disorder 48
DOID:81181	autosomal recessive intellectual developmental disorder 5
DOID:81213	autosomal recessive intellectual developmental disorder 50
DOID:81214	autosomal recessive intellectual developmental disorder 51
DOID:81215	autosomal recessive intellectual developmental disorder 52
DOID:81216	autosomal recessive intellectual developmental disorder 54
DOID:81217	autosomal recessive intellectual developmental disorder 56
DOID:81219	autosomal recessive intellectual developmental disorder 57
DOID:81220	autosomal recessive intellectual developmental disorder 58
DOID:81221	autosomal recessive intellectual developmental disorder 59
DOID:81182	autosomal recessive intellectual developmental disorder 6
DOID:81222	autosomal recessive intellectual developmental disorder 60
DOID:80239	autosomal recessive intellectual developmental disorder 61
DOID:81224	autosomal recessive intellectual developmental disorder 63
DOID:81225	autosomal recessive intellectual developmental disorder 64
DOID:81226	autosomal recessive intellectual developmental disorder 65
DOID:81227	autosomal recessive intellectual developmental disorder 66
DOID:81228	autosomal recessive intellectual developmental disorder 67
DOID:81229	autosomal recessive intellectual developmental disorder 68
DOID:81230	autosomal recessive intellectual developmental disorder 69
DOID:81183	autosomal recessive intellectual developmental disorder 7
DOID:81231	autosomal recessive intellectual developmental disorder 70
DOID:81232	autosomal recessive intellectual developmental disorder 71
DOID:80765	autosomal recessive intellectual developmental disorder 72
DOID:81233	autosomal recessive intellectual developmental disorder 73
DOID:81218	autosomal recessive intellectual developmental disorder 74
DOID:81234	autosomal recessive intellectual developmental disorder 75
DOID:81235	autosomal recessive intellectual developmental disorder 76
DOID:81236	autosomal recessive intellectual developmental disorder 77
DOID:81184	autosomal recessive intellectual developmental disorder 9/26
DOID:70423	early onset progressive encephalopathy with brain atrophy and thin corpus callosum
DOID:81223	glycosylphosphatidylinositol biosynthesis defect 16
DOID:70431	hyperphosphatasia with impaired intellectual development syndrome
DOID:70433	hyperphosphatasia with impaired intellectual development syndrome 1
DOID:70434	hyperphosphatasia with impaired intellectual development syndrome 2
DOID:70435	hyperphosphatasia with impaired intellectual development syndrome 3
DOID:70436	hyperphosphatasia with impaired intellectual development syndrome 4
DOID:70432	hyperphosphatasia with impaired intellectual development syndrome 5
DOID:70437	hyperphosphatasia with impaired intellectual development syndrome 6
DOID:60935	infantile hypotonia with psychomotor retardation and characteristic facies-3
DOID:81265	intellectual developmental disorder with abnormal behavior, microcephaly, and short stature
DOID:81099	neurodevelopmental disorder with brain abnormalities, poor growth, and dysmorphic facies
DOID:70443	neurodevelopmental disorder with cerebellar atrophy and motor dysfunction
DOID:70444	neurodevelopmental disorder with language delay and seizures
DOID:81263	neurodevelopmental disorder with microcephaly, cataracts, and renal abnormalities
DOID:60934	neurodevelopmental disorder with microcephaly, epilepsy, and brain atrophy
DOID:81387	neurodevelopmental disorder with motor and language delay, ocular defects, and brain abnormalities
DOID:81324	neurodevelopmental disorder with poor growth, spastic tetraplegia, and hearing loss
DOID:70421	neurodevelopmental disorder with spasticity and poor growth
DOID:81097	Rafiq syndrome
DOID:70537	spastic tetraplegia, thin corpus callosum, and progressive microcephaly
DOID:50889	non-syndromic intellectual disability
DOID:50776	non-syndromic X-linked intellectual disability
DOID:112037	chromosome Xp11.22 duplication syndrome
DOID:60929	non-syndromic X-linked intellectual developmental disorder 111
DOID:112038	non-syndromic X-linked intellectual disability 1
DOID:112040	non-syndromic X-linked intellectual disability 100
DOID:112048	non-syndromic X-linked intellectual disability 101
DOID:112020	non-syndromic X-linked intellectual disability 103
DOID:112018	non-syndromic X-linked intellectual disability 104
DOID:112036	non-syndromic X-linked intellectual disability 105
DOID:80240	non-syndromic X-linked intellectual disability 106
DOID:112054	non-syndromic X-linked intellectual disability 107
DOID:112027	non-syndromic X-linked intellectual disability 14
DOID:112019	non-syndromic X-linked intellectual disability 19
DOID:112016	non-syndromic X-linked intellectual disability 2
DOID:112023	non-syndromic X-linked intellectual disability 20
DOID:112022	non-syndromic X-linked intellectual disability 21
DOID:112049	non-syndromic X-linked intellectual disability 23
DOID:112051	non-syndromic X-linked intellectual disability 30
DOID:112058	non-syndromic X-linked intellectual disability 41
DOID:112057	non-syndromic X-linked intellectual disability 42
DOID:112028	non-syndromic X-linked intellectual disability 45
DOID:112055	non-syndromic X-linked intellectual disability 46
DOID:112029	non-syndromic X-linked intellectual disability 50
DOID:112047	non-syndromic X-linked intellectual disability 53
DOID:112024	non-syndromic X-linked intellectual disability 58
DOID:112050	non-syndromic X-linked intellectual disability 63
DOID:112059	non-syndromic X-linked intellectual disability 72
DOID:112017	non-syndromic X-linked intellectual disability 73
DOID:112039	non-syndromic X-linked intellectual disability 77
DOID:112033	non-syndromic X-linked intellectual disability 81
DOID:112052	non-syndromic X-linked intellectual disability 82
DOID:112030	non-syndromic X-linked intellectual disability 84
DOID:112053	non-syndromic X-linked intellectual disability 88
DOID:112031	non-syndromic X-linked intellectual disability 89
DOID:112034	non-syndromic X-linked intellectual disability 9
DOID:112041	non-syndromic X-linked intellectual disability 90
DOID:112043	non-syndromic X-linked intellectual disability 91
DOID:112032	non-syndromic X-linked intellectual disability 92
DOID:112045	non-syndromic X-linked intellectual disability 93
DOID:112035	non-syndromic X-linked intellectual disability 96
DOID:112046	non-syndromic X-linked intellectual disability 97
DOID:112044	non-syndromic X-linked intellectual disability 98
DOID:112026	non-syndromic X-linked intellectual disability 99
DOID:112021	non-syndromic X-linked intellectual disability ARX-related
DOID:50888	syndromic intellectual disability
DOID:80473	developmental delay and seizures with or without movement abnormalities
DOID:81301	intellectual developmental disorder with ocular anomalies and distinctive facial features
DOID:111331	intellectual disability-severe speech delay-mild dysmorphism syndrome
DOID:111456	Kaufman oculocerebrofacial syndrome
DOID:111403	mega-corpus-callosum syndrome with cerebellar hypoplasia and cortical malformations
DOID:80312	neurodevelopmental disorder with midbrain and hindbrain malformations
DOID:111332	Pitt-Hopkins-like syndrome 2
DOID:60309	syndromic X-linked intellectual disability
DOID:50764	Armfield syndrome
DOID:50647	Arts syndrome
DOID:111838	Basilicata-Akhtar syndrome
DOID:50681	Borjeson-Forssman-Lehmann syndrome
DOID:60825	Christianson syndrome
DOID:60816	corpus callosum agenesis-intellectual disability-coloboma-micrognathia syndrome
DOID:60830	deafness-intellectual disability, Martin-Probst type syndrome
DOID:112025	female-restricted syndromic X-linked intellectual disability 99
DOID:60801	MEHMO syndrome
DOID:60815	Miles-Carpenter syndrome
DOID:111845	Mullegama-Klein-Martinez syndrome
DOID:111843	Paganini-Miozzo syndrome
DOID:14744	Partington syndrome
DOID:60805	Prieto syndrome
DOID:112060	Raynaud-Claes syndrome
DOID:60179	Renpenning syndrome
DOID:112126	Stocco Dos Santos type X-linked intellectual disability
DOID:70538	syndromic X-linked intellectual developmental disorder bain type
DOID:60804	syndromic X-linked intellectual disability 12
DOID:60821	syndromic X-linked intellectual disability 14
DOID:60803	syndromic X-linked intellectual disability 17
DOID:60817	syndromic X-linked intellectual disability 34
DOID:60800	syndromic X-linked intellectual disability 5
DOID:60808	syndromic X-linked intellectual disability 7
DOID:60823	syndromic X-linked intellectual disability 94
DOID:60818	syndromic X-linked intellectual disability Abidi type
DOID:60822	syndromic X-linked intellectual disability Cabezas type
DOID:60819	syndromic X-linked intellectual disability Chudley-Schwartz type
DOID:60809	syndromic X-linked intellectual disability Claes-Jensen type
DOID:60806	syndromic X-linked intellectual disability Hedera type
DOID:60799	syndromic X-linked intellectual disability Lubs type
DOID:60807	syndromic X-linked intellectual disability Najm type
DOID:60820	syndromic X-linked intellectual disability Nascimento type
DOID:70422	syndromic X-linked intellectual disability Pilorge type
DOID:60824	syndromic X-linked intellectual disability Raymond type
DOID:60826	syndromic X-linked intellectual disability Shashi type
DOID:60813	syndromic X-linked intellectual disability Shrimpton type
DOID:60812	syndromic X-linked intellectual disability Siderius type
DOID:60802	syndromic X-linked intellectual disability Snyder type
DOID:60811	syndromic X-linked intellectual disability Turner type
DOID:60810	syndromic X-linked intellectual disability type 10
DOID:80985	syndromic X-linked intellectual disorder Lujan-Fryns-type
DOID:80241	syndromic X-linked mental retardation 35
DOID:80242	syndromic X-linked mental retardation Hough type
DOID:112042	Tonne-Kalscheuer syndrome
DOID:111840	Van Esch-O'Driscoll syndrome
DOID:60814	Wilson-Turner syndrome
DOID:111844	X-linked intellectual developmental disorder 108
DOID:80984	X-linked intellectual developmental disorder 109
DOID:60828	X-linked intellectual disability-cardiomegaly-congestive heart failure syndrome
DOID:60827	X-linked intellectual disability-psychosis-macroorchidism syndrome
DOID:112056	X-linked intellectual disability-short stature-overweight syndrome
DOID:81123	X-linked mental retardation Gustavson type
DOID:80311	X-linked mental retardation with cerebellar hypoplasia and distinctive facial appearance
DOID:80982	X-linked mental retardation-hypotonic facies syndrome-1
DOID:112339	Tatton-Brown-Rahman syndrome
DOID:535	sleep disorder
DOID:50628	advanced sleep phase syndrome
DOID:110011	advanced sleep phase syndrome 1
DOID:110012	advanced sleep phase syndrome 2
DOID:110013	advanced sleep phase syndrome 3
DOID:2846	bruxism
DOID:111141	delayed sleep phase syndrome
DOID:8986	narcolepsy
DOID:9207	periodic limb movement disorder
DOID:8619	recurrent hypersomnia
DOID:60165	Kleine-Levin syndrome
DOID:9091	REM sleep behavior disorder
DOID:50847	sleep apnea
DOID:9220	central sleep apnea
DOID:80302	mixed sleep apnea
DOID:50848	obstructive sleep apnea
