# Supplementary material
Source: Research Square preprint supplement (doi:10.21203/rs.3.rs-8597698/v1)
Supplement: Supplementary file 5 [file 3d32b692b1257bfdc2a93b0e.xlsx]

## Sheet: Sheet1
Identified proteins with corresponding IDs and expression level in marmoset mPFC
uniprotID	mouseEnsemblGeneID	mouseGeneSymbol	marmosetGeneSymbol	averageExpression_marmoset_mPFC_6mL2	averageExpression_marmoset_mPFC_6mL3
Q9CXV1	ENSMUSG00000000171	Sdhd	SDHD	1.07216	1.13546
Q61271	ENSMUSG00000000532	Acvr1b	ACVR1B	1.42268	1.62151
Q5SRX1	ENSMUSG00000000538	Tom1l2	TOM1L2	2.6134	2.52988
P26048	ENSMUSG00000000560	Gabra2	GABRA2	2.56701	2.62151
Q9CQQ7	ENSMUSG00000000563	Atp5pb	ATP5PB	1.20619	1.12351
Q9JMH9	ENSMUSG00000000631	Myo18a	MYO18A	0.056701	0.0517928
P60904	ENSMUSG00000000826	Dnajc5	DNAJC5	3.56186	3.75697
Q8CHU3	ENSMUSG00000001036	Epn2	EPN2	1.82474	1.66135
P04627	ENSMUSG00000001127	Araf	ARAF	0.314433	0.227092
Q32NY4	ENSMUSG00000001138	Cnnm3	CNNM3	0.0979381	0.171315
Q6NVF0	ENSMUSG00000001173	Ocrl	OCRL	0.762887	0.864542
Q9D517	ENSMUSG00000001211	Agpat3	AGPAT3	2.2268	2.18725
P52800	ENSMUSG00000001300	Efnb2	EFNB2	0.773196	0.717131
Q3U7U3	ENSMUSG00000001786	Fbxo7	FBXO7	0.561856	0.565737
O55131	ENSMUSG00000001833	Septin7	SEPTIN7	7.90722	8.49801
P63001	ENSMUSG00000001847	Rac1	RAC1	4.84536	4.95618
Q9Z2W9	ENSMUSG00000001986	Gria3	GRIA3	4.1701	5.17928
P28028	ENSMUSG00000002413	Braf	BRAF	0.664948	0.780876
Q9CQW1	ENSMUSG00000002741	Ykt6	YKT6	1.25773	1.41036
Q9JMA2	ENSMUSG00000002825	Qtrt1	QTRT1	0.149485	0.215139
P17427	ENSMUSG00000002957	Ap2a2	AP2A2	2.60309	2.57769
P31324	ENSMUSG00000002997	Prkar2b	PRKAR2B	1.73711	1.62948
P55258	ENSMUSG00000003037	Rab8a	RAB8A	0.340206	0.358566
Q9WTK7	ENSMUSG00000003068	Stk11	STK11	0.969072	1.05578
P32037	ENSMUSG00000003153	Slc2a3	LOC100401402	0.561856	0.733068
Q62419	ENSMUSG00000003200	Sh3gl1	SH3GL1	1.18557	1.13147
P54285	ENSMUSG00000003352	Cacnb3	CACNB3	2.52577	2.98805
Q9D7X3	ENSMUSG00000003518	Dusp3	DUSP3	3.08247	3.49004
Q99J08	ENSMUSG00000003585	Sec14l2	SEC14L2	0.417526	0.442231
P60469	ENSMUSG00000003863	Ppfia3	PPFIA3	2.43299	2.61355
Q07813	ENSMUSG00000003873	Bax	BAX	0.293814	0.346614
O35393	ENSMUSG00000003934	Efnb3	EFNB3	0.407216	0.434263
Q9QYS2	ENSMUSG00000003974	Grm3	GRM3	4.04124	3.84064
O70252	ENSMUSG00000004070	Hmox2	HMOX2	1.05155	1.22311
Q61290	ENSMUSG00000004110	Cacna1e	CACNA1E	2.13402	2.04781
O55017	ENSMUSG00000004113	Cacna1b	CACNA1B	1.45361	1.54183
Q9D1K2	ENSMUSG00000004285	Atp6v1f	ATP6V1F	4.75258	4.50996
Q9JLV5	ENSMUSG00000004364	Cul3	CUL3	1.13402	1.22709
Q9Z1S8	ENSMUSG00000004508	Gab2	GAB2	0.123711	0.187251
Q91WL8	ENSMUSG00000004637	Wwox	WWOX	0.056701	0.0916335
P35288	ENSMUSG00000004768	Rab23	RAB23	0.984536	1.13546
Q8BJF9	ENSMUSG00000004843	Chmp2b	CHMP2B	0.93299	0.98008
P43006	ENSMUSG00000005089	Slc1a2	SLC1A2	46.6082	33.2351
Q99N28	ENSMUSG00000005338	Cadm3	CADM3	5.84021	6.60956
P56564	ENSMUSG00000005360	Slc1a3	SLC1A3	15.4021	10.6414
P05132	ENSMUSG00000005469	Prkaca	PRKACA	2.25258	2.28685
Q9QYJ3	ENSMUSG00000005483	Dnajb1	DNAJB1	1.7732	1.66932
P61082	ENSMUSG00000005575	Ube2m	UBE2M	3.25773	2.88048
P51830	ENSMUSG00000005580	Adcy9	ADCY9	0.634021	0.812749
P05532	ENSMUSG00000005672	Kit	KIT	1.03608	0.494024
P54754	ENSMUSG00000005958	Ephb3	EPHB3	0.608247	0.673307
Q9DB05	ENSMUSG00000006024	Napa	NAPA	5.49485	6.00398
Q9D1E6	ENSMUSG00000006095	Tbcb	TBCB	3.86082	3.85657
Q99KN9	ENSMUSG00000006169	Clint1	CLINT1	0.510309	0.601594
Q60902	ENSMUSG00000006276	Eps15l1	EPS15L1	0.809278	0.752988
Q9DCT8	ENSMUSG00000006356	Crip2	CRIP2	4.14948	4.72908
Q99NF2	ENSMUSG00000006476	Nsmf	NSMF	10.232	8.85259
O08576	ENSMUSG00000006575	Rundc3a	RUNDC3A	3.17526	3.32669
P16283	ENSMUSG00000006576	Slc4a3	SLC4A3	2.59794	2.74104
P60766-1	ENSMUSG00000006699	Cdc42	CDC42	5.24742	4.98406
Q02248	ENSMUSG00000006932	Ctnnb1	CTNNB1	5.69072	5.67729
Q8R191	ENSMUSG00000007021	Syngr3	SYNGR3	3.70619	3.99203
Q9Z1Q2	ENSMUSG00000007036	Abhd16a	ABHD16A	1.76804	2.03984
Q6PIE5	ENSMUSG00000007097	Atp1a2	ATP1A2	0.664948	0.545817
Q9WV27	ENSMUSG00000007107	Atp1a4	ATP1A4	0	0.00398406
O35526	ENSMUSG00000007207	Stx1a	STX1A	5.7268	6.69323
Q03141	ENSMUSG00000007411	Mark3	MARK3	2.06186	1.88845
Q80WG5	ENSMUSG00000007476	Lrrc8a	LRRC8A	0.752577	0.625498
P63137-2	ENSMUSG00000007653	Gabrb2	GABRB2	1.54124	1.68127
P62743	ENSMUSG00000008036	Ap2s1	AP2S1	4.30412	4.44622
Q923Z0	ENSMUSG00000008734	Gprc5b	GPRC5B	2.30412	1.67729
Q9DBX2	ENSMUSG00000009030	Pdcl	PDCL	0.0515464	0.0677291
Q64332-2	ENSMUSG00000009394	Syn2	SYN2	1.57216	1.68526
Q8R570	ENSMUSG00000009894	Snap47	SNAP47	1.64948	1.56574
Q6GV12	ENSMUSG00000009905	Kdsr	KDSR	0.639175	0.733068
P47740	ENSMUSG00000010025	Aldh3a2	ALDH3A2	0.0721649	0.0159363
Q9WVF8	ENSMUSG00000010054	Tusc2	TUSC2	1.88144	1.95219
Q9DCP2	ENSMUSG00000010064	Slc38a3	SLC38A3	0.505155	0.454183
P10852	ENSMUSG00000010095	Slc3a2	SLC3A2	1.52577	1.21116
Q5SYL3	ENSMUSG00000010277	Bltp2	KIAA0100	0.798969	0.836653
P62812	ENSMUSG00000010803	Gabra1	GABRA1	5.83505	6.64143
Q80WQ2	ENSMUSG00000010936	Vac14	VAC14	0.639175	0.63745
Q9DBJ1	ENSMUSG00000011752	Pgam1	PGAM1	11.067	12.0518
Q6P2B1	ENSMUSG00000012535	Tnpo3	TNPO3	0.556701	0.545817
Q80TR1	ENSMUSG00000013033	Adgrl1	ADGRL1	1.52062	1.85259
B0V2N1	ENSMUSG00000013236	Ptprs	PTPRS	6.63918	6.43426
Q62048	ENSMUSG00000013698	Pea15a	PEA15	9.84021	8.67729
Q9CXW3	ENSMUSG00000014226	Cacybp	CACYBP	3.8299	4.11155
Q8C079	ENSMUSG00000014601	Strip1	STRIP1	0.716495	0.988048
Q9CRB6	ENSMUSG00000014846	Tppp3	TPPP3	0.175258	0.155378
Q8BG67	ENSMUSG00000015002	Efr3a	EFR3A	3.13918	3.50598
Q9Z2C4	ENSMUSG00000015214	Mtmr1	MTMR1	0.448454	0.386454
Q9QXY7	ENSMUSG00000015342	Xk	XK	0.242268	0.270916
O35449	ENSMUSG00000015476	Prrt1	PRRT1	0.00515464	0.0159363
P63017	ENSMUSG00000015656	Hspa8	HSPA8	9.07732	9.90837
Q8BIW1	ENSMUSG00000015711	Prune1	PRUNE1	0.159794	0.250996
Q8QZV4	ENSMUSG00000015981	Stk32c	STK32C	0	0.00398406
Q9Z351-12	ENSMUSG00000016346	Kcnq2	KCNQ2	3.70103	4.17928
O54991	ENSMUSG00000017167	Cntnap1	CNTNAP1	3.01031	3.65339
Q8R1B0	ENSMUSG00000017400	Stac2	STAC2	0.139175	0.199203
Q8R0S4	ENSMUSG00000017412	Cacnb4	CACNB4	2.21649	2.6255
Q5SSL4	ENSMUSG00000017631	Abr	ABR	8.52062	9.03984
Q91V14	ENSMUSG00000017740	Slc12a5	SLC12A5	0.0412371	0.0478088
P53810	ENSMUSG00000017781	Pitpna	PITPNA	2.48969	2.52988
Q60996	ENSMUSG00000017843	Ppp2r5c	PPP2R5C	2.20619	2.62948
Q8BYR5-2	ENSMUSG00000017978	Cadps2	CADPS2	0.551546	0.737052
Q61097-2	ENSMUSG00000018334	Ksr1	KSR1	0.345361	0.370518
Q8CHH9	ENSMUSG00000018398	Septin8	SEPTIN8	3.08763	3.05179
P10637	ENSMUSG00000018411	Mapt	MAPT	4.43814	4.12749
Q9WTR1	ENSMUSG00000018507	Trpv2	TRPV2	0.278351	0.358566
Q80XI4	ENSMUSG00000018547	Pip4k2b	PIP4K2B	5.1701	5.50199
Q9ERR1	ENSMUSG00000018736	Ndel1	NDEL1	1.75773	2.18327
Q8K448	ENSMUSG00000018800	Abca5	ABCA5	0.0721649	0.0756972
O88602	ENSMUSG00000019146	Cacng2	CACNG2	0.0824742	0.14741
P97952	ENSMUSG00000019194	Scn1b	SCN1B	1.32474	1.30279
P50518	ENSMUSG00000019210	Atp6v1e1	ATP6V1E1	6.69588	7.32669
Q9Z1G4	ENSMUSG00000019302	Atp6v0a1	ATP6V0A1	4.93814	4.59363
Q9JIZ9	ENSMUSG00000019461	Plscr3	PLSCR3	0.134021	0.223108
Q8VBW1	ENSMUSG00000019558	Slc6a8	SLC6A8	1.35567	1.24701
Q99PL6	ENSMUSG00000019578	Ubxn6	UBXN6	1.89691	1.87649
Q9QZB0	ENSMUSG00000019775	Rgs17	RGS17	0.108247	0.0996016
Q9CPS6	ENSMUSG00000019791	Hint3	HINT3	1.0567	1.14343
P97772	ENSMUSG00000019828	Grm1	GRM1	0.793814	0.888446
Q8R5H6	ENSMUSG00000019831	Wasf1	WASF1	4.08763	4.23904
Q3UGY8	ENSMUSG00000019852	Arfgef3	ARFGEF3	2.13402	2.27092
O54916	ENSMUSG00000019854	Reps1	REPS1	0.912371	0.804781
Q9CR26	ENSMUSG00000019868	Vta1	VTA1	0.979381	0.87251
Q9QZI8	ENSMUSG00000019877	Serinc1	SERINC1	12.3041	13.6733
G5E829	ENSMUSG00000019943	Atp2b1	ATP2B1	8.19588	9.21116
P49769	ENSMUSG00000019969	Psen1	PSEN1	0.824742	0.796813
O70439	ENSMUSG00000019998	Stx7	STX7	0.221649	0.187251
Q8R4C2	ENSMUSG00000020070	Rufy2	RUFY2	0.778351	0.737052
Q9D882	ENSMUSG00000020083	Fam241b	FAM241B	0.0979381	0.135458
Q6ZQ38	ENSMUSG00000020114	Cand1	CAND1	0.737113	0.808765
P35282	ENSMUSG00000020132	Rab21	RAB21	1.48969	1.34661
O35874	ENSMUSG00000020142	Slc1a4	SLC1A4	1.68041	1.32271
P62821	ENSMUSG00000020149	Rab1a	RAB1A	3.85052	3.68924
Q8C180	ENSMUSG00000020170	Frs2	FRS2	0.386598	0.410359
B9EJ86	ENSMUSG00000020189	Osbpl8	OSBPL8	1.43299	1.48606
O54774	ENSMUSG00000020198	Ap3d1	AP3D1	0.0412371	0.0398406
Q6P5F9	ENSMUSG00000020290	Xpo1	XPO1	1.72165	1.53785
Q7TN98	ENSMUSG00000020300	Cpeb4	CPEB4	1.84536	1.90438
Q62261	ENSMUSG00000020315	Sptbn1	SPTBN1	10.6082	10.3825
O88703	ENSMUSG00000020331	Hcn2	HCN2	1.66495	1.49402
Q5SQX6	ENSMUSG00000020340	Cyfip2	CYFIP2	7.76804	7.92829
O88444	ENSMUSG00000020431	Adcy1	ADCY1	7.36598	7.48606
P22723	ENSMUSG00000020436	Gabrg2	GABRG2	2.77835	3.13546
P84084	ENSMUSG00000020440	Arf5	ARF5	6.48454	6.30279
P62983	ENSMUSG00000020460	Rps27a	RPS27A	7.59794	6.50996
P23818	ENSMUSG00000020524	Gria1	GRIA1	2.48969	2.19522
Q9QXB9	ENSMUSG00000020537	Drg2	DRG2	0.639175	0.828685
O09117	ENSMUSG00000020570	Sypl1	SYPL1	0.56701	0.454183
P27601	ENSMUSG00000020611	Gna13	GNA13	0.530928	0.38247
Q8VHH7	ENSMUSG00000020654	Adcy3	ADCY3	0.597938	0.641434
Q6ZQ18	ENSMUSG00000020658	Efr3b	EFR3B	1.55155	1.56574
P61027	ENSMUSG00000020671	Rab10	RAB10	2.58763	2.41833
P06880	ENSMUSG00000020713	Gh	GH1	0	0
Q04690-2	ENSMUSG00000020716	Nf1	NF1	0.0773196	0.0239044
Q7TSH8	ENSMUSG00000020747	Tmem94	TMEM94	1.47423	1.46215
O35250	ENSMUSG00000020792	Exoc7	EXOC7	1.63402	1.82869
Q9JM52	ENSMUSG00000020827	Mink1	MINK1	1.77835	1.79681
Q91WL6	ENSMUSG00000020876	Snx11	SNX11	0.412371	0.422311
Q8R3Z5	ENSMUSG00000020882	Cacnb1	CACNB1	1.93299	2.18725
Q62108	ENSMUSG00000020886	Dlg4	DLG4	2.70103	2.90837
P63044	ENSMUSG00000020894	Vamp2	VAMP2	12.4794	12.4343
Q5SUR0	ENSMUSG00000020899	Pfas	PFAS	0.0670103	0.063745
O88983	ENSMUSG00000020903	Stx8	STX8	0.896907	1.13546
Q9D289	ENSMUSG00000020993	Trappc6b	TRAPPC6B	0.314433	0.398406
Q6GYP7	ENSMUSG00000021027	Ralgapa1	RALGAPA1	0.814433	0.896414
Q8BK64	ENSMUSG00000021037	Ahsa1	AHSA1	1.71134	1.74502
Q8BGQ1	ENSMUSG00000021038	Vipas39	VIPAS39	0.35567	0.338645
Q61151	ENSMUSG00000021051	Ppp2r5e	PPP2R5E	1.23196	1.43825
Q8C7M3-2	ENSMUSG00000021071	Trim9	TRIM9	3.10825	3.25498
Q3V3Q7	ENSMUSG00000021143	Pacs2	PACS2	1.06186	1.05976
Q8CBE3	ENSMUSG00000021147	Wdr37	WDR37	0.603093	0.792829
Q3TZZ7	ENSMUSG00000021171	Esyt2	ESYT2	1.20103	1.251
Q8C0Y0	ENSMUSG00000021209	Ppp4r4	PPP4R4	1.15464	1.21912
Q61598	ENSMUSG00000021218	Gdi2	GDI2	3.05155	3.43426
Q9Z2H2	ENSMUSG00000021219	Rgs6	RGS6	0.530928	0.673307
Q9QZS3	ENSMUSG00000021224	Numb	NUMB	0.427835	0.47012
Q9WVK8	ENSMUSG00000021259	Cyp46a1	CYP46A1	0.113402	0.12749
Q7TT50	ENSMUSG00000021279	Cdc42bpb	CDC42BPB	2.28351	2.50598
P59325	ENSMUSG00000021282	Eif5	EIF5	2.23711	2.15936
Q8K4P8	ENSMUSG00000021301	Hecw1	HECW1	0.685567	0.840637
Q7TQF7	ENSMUSG00000021314	Amph	AMPH	2.37629	2.28685
Q5NCE8	ENSMUSG00000021339	Mrs2	MRS2	0.170103	0.298805
Q9D4H1	ENSMUSG00000021357	Exoc2	EXOC2	0.407216	0.577689
O09126	ENSMUSG00000021451	Sema4d	SEMA4D	0.659794	0.669323
Q80TL1	ENSMUSG00000021536	Adcy2	ADCY2	1.25258	1.0757
Q641K1	ENSMUSG00000021557	Agtpbp1	AGTPBP1	0.731959	1.04382
Q7TQD2	ENSMUSG00000021573	Tppp	TPPP	3.22165	2.95618
E9PV86	ENSMUSG00000021596	Mctp1	MCTP1	0.819588	0.972112
Q61327	ENSMUSG00000021609	Slc6a3	SLC6A3	0	0
Q8K021	ENSMUSG00000021687	Scamp1	SCAMP1	3.21134	3.07968
P62823	ENSMUSG00000021700	Rab3c	RAB3C	5.81443	6.08367
Q8BQP9	ENSMUSG00000021719	Rgs7bp	RGS7BP	0.0412371	0.0717131
P21995	ENSMUSG00000021728	Emb	EMB	0.0154639	0.00796813
O88704	ENSMUSG00000021730	Hcn1	HCN1	0.14433	0.219124
Q8BTY2	ENSMUSG00000021733	Slc4a7	SLC4A7	0.304124	0.354582
Q923T9	ENSMUSG00000021820	Camk2g	CAMK2G	3.34021	3.57371
P61750	ENSMUSG00000021877	Arf4	ARF4	1.93299	1.7012
Q5Y5T1	ENSMUSG00000021969	Zdhhc20	ZDHHC20	0.469072	0.414343
P98200	ENSMUSG00000021983	Atp8a2	ATP8A2	1.17526	1.12749
Q8CCJ4	ENSMUSG00000021986	Amer2	AMER2	1.82474	1.70518
Q9Z1L5	ENSMUSG00000021991	Cacna2d3	CACNA2D3	0.92268	1.04382
Q9CX34	ENSMUSG00000022024	Sugt1	SUGT1	1.62371	1.50598
Q9QXV8	ENSMUSG00000022114	Spry2	SPRY2	1.16495	1.19124
Q8VEL9	ENSMUSG00000022176	Rem2	REM2	0	0.00796813
Q9QXW9	ENSMUSG00000022180	Slc7a8	SLC7A8	0.597938	0.665339
O35927	ENSMUSG00000022240	Ctnnd2	CTNND2	5.66495	5.50598
Q4KMM3	ENSMUSG00000022307	Oxr1	OXR1	2.60825	2.93625
Q99J56	ENSMUSG00000022365	Derl1	DERL1	0.536082	0.625498
P97490	ENSMUSG00000022376	Adcy8	ADCY8	0.242268	0.23506
Q9QWY8-2	ENSMUSG00000022377	Asap1	ASAP1	1.93814	2.26295
Q921M7	ENSMUSG00000022378	Cyrib	CYRIB	1.80412	1.85259
P54822	ENSMUSG00000022407	Adsl	ADSL	0.381443	0.366534
O55100	ENSMUSG00000022415	Syngr1	SYNGR1	5.9433	6.65339
Q9CPQ3	ENSMUSG00000022427	Tomm22	TOMM22	0.335052	0.390438
Q01065	ENSMUSG00000022489	Pde1b	PDE1B	1.54639	1.75697
Q9CZN4	ENSMUSG00000022494	Shisa9	SHISA9	0.984536	1.06773
Q61730-3	ENSMUSG00000022514	Il1rap	IL1RAP	0.283505	0.195219
P34152	ENSMUSG00000022607	Ptk2	PTK2	1.18557	1.31474
Q9QXL2	ENSMUSG00000022629	Kif21a	KIF21A	2.35052	2.56972
Q61490	ENSMUSG00000022636	Alcam	ALCAM	1.90206	2.57769
Q9R1Q8	ENSMUSG00000022658	Tagln3	TAGLN3	5.79381	5.83267
O54901	ENSMUSG00000022661	Cd200	LOC100412839	3.10309	3.67331
Q99K01	ENSMUSG00000022680	Pdxdc1	PDXDC1	1.07732	1.15936
Q6AXF6	ENSMUSG00000022696	Sidt1	SIDT1	0.0103093	0
Q9CQX5	ENSMUSG00000022744	Cldnd1	CLDND1	1	1.08367
Q8BLQ7	ENSMUSG00000022756	Slc7a4	SLC7A4	0.350515	0.2749
O35136	ENSMUSG00000022762	Ncam2	NCAM2	5.06186	5.32669
Q3TY86	ENSMUSG00000022763	Aifm3	AIFM3	0.365979	0.358566
Q9ERB0	ENSMUSG00000022765	Snap29	SNAP29	0.670103	0.912351
Q811D0	ENSMUSG00000022770	Dlg1	DLG1	1.7732	1.81673
Q9WV60	ENSMUSG00000022812	Gsk3b	GSK3B	2.96392	3.21116
Q5DQR4	ENSMUSG00000022829	Stxbp5l	STXBP5L	0.896907	1.11952
Q8BP00	ENSMUSG00000022837	Iqcb1	IQCB1	0.0824742	0.0956175
P84309	ENSMUSG00000022840	Adcy5	ADCY5	1.01031	0.784861
P84091	ENSMUSG00000022841	Ap2m1	AP2M1	13.1546	13.259
P97792	ENSMUSG00000022865	Cxadr	CXADR	0.164948	0.183267
O89026	ENSMUSG00000022883	Robo1	ROBO1	0.963918	0.768924
Q8K097	ENSMUSG00000023011	Faim2	FAIM2	6.13918	6.52988
Q8JZR6	ENSMUSG00000023032	Slc4a8	SLC4A8	0.871134	0.924303
Q9WTU3	ENSMUSG00000023033	Scn8a	SCN8A	2.82474	2.88845
P97447	ENSMUSG00000023092	Fhl1	FHL1	2.71649	2.19522
P18572	ENSMUSG00000023175	Bsg	BSG	11.7423	11.7052
Q14BI2	ENSMUSG00000023192	Grm2	GRM2	1.74742	2.34661
Q91WJ0	ENSMUSG00000023266	Frs3	FRS3	0.262887	0.298805
Q9Z0P5	ENSMUSG00000023277	Twf2	TLR9	1.34021	1.68127
Q8VHH5	ENSMUSG00000023353	Agap3	AGAP3	5.14948	4.72112
Q6ZPF3	ENSMUSG00000023800	Tiam2	TIAM2	0.556701	0.717131
Q9JJE4	ENSMUSG00000023909	Paqr4	PAQR4	0.762887	0.940239
Q9EPU5	ENSMUSG00000023915	Tnfrsf21	TNFRSF21	1.03093	1.21912
Q9JIM1	ENSMUSG00000023942	Slc29a1	SLC29A1	0.592784	0.561753
Q8BGY9	ENSMUSG00000023945	Slc5a7	SLC5A7	0	0
Q8JZW4	ENSMUSG00000024008	Cpne5	CPNE5	2.69072	3.18725
Q791T5	ENSMUSG00000024012	Mtch1	MTCH1	12.4433	13.6255
Q64343	ENSMUSG00000024030	Abcg1	ABCG1	0.247423	0.231076
Q9WV92	ENSMUSG00000024044	Epb41l3	EPB41L3	1.3866	1.62948
Q9QXY6	ENSMUSG00000024065	Ehd3	EHD3	1.7732	2.26693
O55106	ENSMUSG00000024077	Strn	STRN	0.376289	0.398406
Q9WV55	ENSMUSG00000024091	Vapa	VAPA	2.78866	2.76494
Q62172	ENSMUSG00000024096	Ralbp1	RALBP1	1.12887	1.18327
P63082	ENSMUSG00000024121	Atp6v0c	ATP6V0C	23.4897	24.6016
P47743	ENSMUSG00000024211	Grm8	GRM8	0.175258	0.14741
Q99JP0	ENSMUSG00000024242	Map4k3	MAP4K3	0.824742	0.709163
Q9CQS4	ENSMUSG00000024259	Slc25a46	SLC25A46	1.96392	1.76892
Q8C145	ENSMUSG00000024270	Slc39a6	SLC39A6	0.680412	0.673307
Q8BGU5	ENSMUSG00000024286	Ccny	CCNY	1.24742	1.19124
Q9D2N4-2	ENSMUSG00000024302	Dtna	DTNA	2.55155	2.29482
P15116	ENSMUSG00000024304	Cdh2	CDH2	1.08763	1.0757
Q8C754	ENSMUSG00000024319	Vps52	VPS52	0.613402	0.697211
O08539	ENSMUSG00000024381	Bin1	BIN1	3.48969	3.749
P55088	ENSMUSG00000024411	Aqp4	AQP4	3.08763	2.14343
Q9WV18	ENSMUSG00000024462	Gabbr1	GABBR1	4.07216	3.84462
Q8BI08	ENSMUSG00000024479	Mal2	MAL2	2.52062	2.76494
Q99P58	ENSMUSG00000024511	Rab27b	RAB27B	0.42268	0.247012
Q52KF3	ENSMUSG00000024533	Spire1	SPIRE1	1.68557	1.69721
P98195	ENSMUSG00000024566	Atp9b	ATP9B	0.170103	0.227092
P55012	ENSMUSG00000024597	Slc12a2	SLC12A2	0.608247	0.625498
Q9Z0R9	ENSMUSG00000024665	Fads2	FADS2	2.10309	2.05976
Q3B7Z2	ENSMUSG00000024687	Osbp	OSBP	0.659794	0.717131
Q922P8	ENSMUSG00000024736	Tmem132a	TMEM132A	9.45361	9.55777
Q9R0N7-4	ENSMUSG00000024743	Syt7	SYT7	3.61856	3.77291
Q9ES97	ENSMUSG00000024758	Rtn3	RTN3	16.201	18.251
Q9ES97-3	ENSMUSG00000024758	Rtn3	RTN3	16.201	18.251
Q9WVK4	ENSMUSG00000024772	Ehd1	EHD1	0.448454	0.410359
Q6PD28	ENSMUSG00000024777	Ppp2r5b	PPP2R5B	1.7268	1.69323
Q3UVL4	ENSMUSG00000024797	Vps51	VPS51	2.3299	2.47012
Q8K212	ENSMUSG00000024855	Pacs1	PACS1	0.628866	0.633466
Q80VQ0	ENSMUSG00000024885	Aldh3b1	LOC100405175	0	0.00398406
Q61672	ENSMUSG00000024891	Slc29a2	SLC29A2	0.0515464	0.0358566
P97742	ENSMUSG00000024900	Cpt1a	CPT1A	0.237113	0.223108
Q9EQC5	ENSMUSG00000024941	Scyl1	SCYL1	0.778351	0.908367
Q61161	ENSMUSG00000024948	Map4k2	MAP4K2	0.108247	0.227092
Q05512	ENSMUSG00000024969	Mark2	MARK2	1.30928	1.41434
Q9QYB5	ENSMUSG00000025026	Add3	ADD3	1.75258	1.18327
Q9WUL7	ENSMUSG00000025035	Arl3	ARL3	1.97938	2.08367
O54988-2	ENSMUSG00000025060	Slk	SLK	1.40206	1.80478
Q8K4G5-2	ENSMUSG00000025085	Ablim1	ABLIM1	1.6134	1.49801
Q8K0U4	ENSMUSG00000025092	Hspa12a	HSPA12A	1.85052	1.8247
Q8BRU6	ENSMUSG00000025094	Slc18a2	SLC18A2	0.00515464	0.00796813
Q99PT1	ENSMUSG00000025132	Arhgdia	ARHGDIA	2.79381	2.81275
Q8VBT9	ENSMUSG00000025142	Aspscr1	ASPSCR1	1.49485	1.45418
Q9D6J5	ENSMUSG00000025204	Ndufb8	NDUFB8	5.88144	5.98406
Q9EP69	ENSMUSG00000025240	Sacm1l	SACM1L	0.798969	0.984064
Q7TMY8	ENSMUSG00000025261	Huwe1	HUWE1	1.6701	1.66135
Q8R2Y0	ENSMUSG00000025277	Abhd6	ABHD6	1.07732	1.29482
Q64455	ENSMUSG00000025314	Ptprj	PTPRJ	1.26804	1.61355
Q8BKX1-2	ENSMUSG00000025372	Baiap2	BAIAP2	4.62371	4.92829
Q3UHD9	ENSMUSG00000025422	Agap2	AGAP2	5.21649	5.48606
Q8C4G9	ENSMUSG00000025475	Adgra1	ADGRA1	1.71134	1.80876
Q61411	ENSMUSG00000025499	Hras	HRAS	1.3299	1.3506
Q922Q9	ENSMUSG00000025512	Chid1	CHID1	0.386598	0.430279
Q8BIK4	ENSMUSG00000025558	Dock9	DOCK9	1.6701	1.50199
Q8K4Q0	ENSMUSG00000025583	Rptor	RPTOR	0.747423	0.681275
Q80YA9	ENSMUSG00000025658	Cnksr2	CNKSR2	3.68041	4.4502
Q80YA9-2	ENSMUSG00000025658	Cnksr2	CNKSR2	3.68041	4.4502
Q64519	ENSMUSG00000025743	Sdc3	SDC3	5.75258	6.65339
O88741	ENSMUSG00000025777	Gdap1	GDAP1	1.28866	1.50598
P09055	ENSMUSG00000025809	Itgb1	ITGB1	0.701031	0.7251
P84086	ENSMUSG00000025867	Cplx2	CPLX2	8.85052	6.46614
Q8K1S4	ENSMUSG00000025876	Unc5a	UNC5A	2.07216	2.24701
O55042	ENSMUSG00000025889	Snca	SNCA	5.47423	6.50996
O35375	ENSMUSG00000025969	Nrp2	NRP2	0.226804	0.191235
Q8BHE8	ENSMUSG00000025971	Maip1	MAIP1	0.438144	0.541833
Q6P5F6	ENSMUSG00000025986	Slc39a10	SLC39A10	4.71134	5.67729
P42225	ENSMUSG00000026104	Stat1	STAT1	0.618557	0.545817
Q91VZ6	ENSMUSG00000026155	Smap1	SMAP1	1.12887	1.16335
Q8VE52	ENSMUSG00000026158	Ogfrl1	OGFRL1	1.25258	1.19522
Q8K2K6	ENSMUSG00000026159	Agfg1	AGFG1	1.2732	1.50199
Q9QYI5	ENSMUSG00000026203	Dnajb2	DNAJB2	3.18041	3.31474
Q62407	ENSMUSG00000026207	Speg	SPEG	1.36598	1.5498
Q91VK4	ENSMUSG00000026223	Itm2c	ITM2C	11.8814	11.0199
Q03137	ENSMUSG00000026235	Epha4	EPHA4	2.35567	2.749
Q148V7	ENSMUSG00000026319	Relch	RELCH	0.762887	0.996016
Q8C996	ENSMUSG00000026347	Tmem163	TMEM163	0.221649	0.394422
Q62348	ENSMUSG00000026374	Tsn	TSN	0	0.00398406
Q99JG2	ENSMUSG00000026424	Gpr37l1	GPR37L1	2.55155	1.93625
P46097	ENSMUSG00000026452	Syt2	SYT2	0.0360825	0.059761
Q9DB73	ENSMUSG00000026456	Cyb5r1	CYB5R1	0.912371	0.98008
Q6Q477	ENSMUSG00000026463	Atp2b4	ATP2B4	4.36598	4.93227
Q9Z0U0	ENSMUSG00000026469	Xpr1	XPR1	0.938144	0.876494
Q9JKK1	ENSMUSG00000026470	Stx6	STX6	0.510309	0.729084
O54829	ENSMUSG00000026527	Rgs7	RGS7	1.75773	2.13147
P14094	ENSMUSG00000026576	Atp1b1	ATP1B1	21.1804	22.4622
Q61137	ENSMUSG00000026587	Astn1	ASTN1	2.31443	2.56574
Q4JIM5	ENSMUSG00000026596	Abl2	ABL2	0.329897	0.334661
Q6PD03	ENSMUSG00000026626	Ppp2r5a	PPP2R5A	0.865979	0.984064
Q9CPU4	ENSMUSG00000026688	Mgst3	MGST3	5.29897	5.23506
O70172	ENSMUSG00000026737	Pip4k2a	PIP4K2A	1.1134	1.32669
P62484	ENSMUSG00000026782	Abi2	ABI2	4.64948	5.10359
Q8R5A3	ENSMUSG00000026786	Apbb1ip	APBB1IP	0.0721649	0.063745
O08599	ENSMUSG00000026797	Stxbp1	STXBP1	11.9845	13.1833
P63250	ENSMUSG00000026824	Kcnj3	KCNJ3	1.34536	1.81673
Q8R3V5	ENSMUSG00000026860	Sh3glb2	SH3GLB2	4.06701	4.25498
Q3UHC7	ENSMUSG00000026883	Dab2ip	DAB2IP	1.26804	1.62948
Q5DTL9	ENSMUSG00000026904	Slc4a10	SLC4A10	2.74227	3.04781
A2AHC3	ENSMUSG00000026933	Camsap1	CAMSAP1	1.62371	1.75697
P35438	ENSMUSG00000026959	Grin1	GRIN1	11.0928	11.2151
Q68FH0	ENSMUSG00000026991	Pkp4	PKP4	1.74227	1.71315
P28660	ENSMUSG00000027002	Nckap1	NCKAP1	5.53608	5.75299
Q924N4	ENSMUSG00000027130	Slc12a6	SLC12A6	0.572165	0.513944
Q9CZX9	ENSMUSG00000027131	Emc4	EMC4	1.36598	1.37849
P40237	ENSMUSG00000027215	Cd82	CD82	0.391753	0.298805
Q5FWK3	ENSMUSG00000027247	Arhgap1	ARHGAP1	1.04124	0.984064
P60879	ENSMUSG00000027273	Snap25	SNAP25	34.067	40.4382
P60879-2	ENSMUSG00000027273	Snap25	SNAP25	34.067	40.4382
Q791V5	ENSMUSG00000027282	Mtch2	MTCH2	0.551546	0.633466
Q9D1G5	ENSMUSG00000027286	Lrrc57	LRRC57	0.128866	0.151394
Q9EQP2	ENSMUSG00000027293	Ehd4	EHD4	0.0360825	0.0398406
P18052	ENSMUSG00000027303	Ptpra	PTPRA	3.56186	3.66534
Q9EPR4	ENSMUSG00000027340	Slc23a2	SLC23A2	1.51546	1.4741
Q924S8	ENSMUSG00000027351	Spred1	SPRED1	2.44845	3.09163
Q61609	ENSMUSG00000027397	Slc20a1	SLC20A1	0.798969	0.972112
P28663	ENSMUSG00000027438	Napb	NAPB	3.63918	4.13147
Q61234	ENSMUSG00000027488	Snta1	SNTA1	1.75258	1.57371
P55821	ENSMUSG00000027500	Stmn2	STMN2	9.6701	11.0518
Q62393	ENSMUSG00000027506	Tpd52	TPD52	1.62371	1.91235
Q3U1F9	ENSMUSG00000027508	Pag1	PAG1	0.170103	0.179283
P35285	ENSMUSG00000027519	Rab22a	RAB22A	1.57216	1.7012
Q8BYK5	ENSMUSG00000027525	Phactr3	PHACTR3	1.32474	1.53386
O70228	ENSMUSG00000027546	Atp9a	ATP9A	0.871134	0.737052
Q9EPJ9	ENSMUSG00000027575	Arfgap1	ARFGAP1	1.25773	1.2749
O70174	ENSMUSG00000027577	Chrna4	CHRNA4	0.659794	0.414343
O70166	ENSMUSG00000027581	Stmn3	STMN3	10.1804	10.2789
Q99JP7	ENSMUSG00000027603	Ggt7	GGT7	1.60825	2.01195
Q9Z2H5	ENSMUSG00000027624	Epb41l1	EPB41L1	3.51546	3.22709
Q9DBG6	ENSMUSG00000027642	Rpn2	RPN2	3.60825	3.78486
P05480	ENSMUSG00000027646	Src	SRC	0.57732	0.601594
Q8BQZ4	ENSMUSG00000027652	Ralgapb	RALGAPB	0.835052	0.928287
Q8C437	ENSMUSG00000027674	Pex5l	PEX5L	3.09278	3.87251
P83510	ENSMUSG00000027692	Tnik	TNIK	0.814433	0.649402
O35963	ENSMUSG00000027739	Rab33b	RAB33B	0.206186	0.203187
Q9EPN1	ENSMUSG00000027799	Nbea	NBEA	3.29897	3.34661
Q9CR16	ENSMUSG00000027804	Ppid	PPID	0.556701	0.693227
Q9R0N8	ENSMUSG00000027849	Syt6	SYT6	0.0618557	0.063745
Q922J6	ENSMUSG00000027858	Tspan2	TSPAN2	0.0360825	0.0318725
Q8BJI1	ENSMUSG00000027894	Slc6a17	SLC6A17	0.0206186	0.0398406
P48168	ENSMUSG00000028020	Glrb	GLRB	2.2268	2.62948
Q9JK45	ENSMUSG00000028033	Kcnq5	KCNQ5	1.60825	1.78486
O35609	ENSMUSG00000028049	Scamp3	SCAMP3	1.1701	0.984064
O88705	ENSMUSG00000028051	Hcn3	HCN3	0.0773196	0.059761
P20352	ENSMUSG00000028128	F3	F3	0.505155	0.394422
E9Q912	ENSMUSG00000028149	Rap1gds1	RAP1GDS1	2.36082	2.41434
P63328	ENSMUSG00000028161	Ppp3ca	PPP3CA	12.134	14.247
Q8JZZ7	ENSMUSG00000028184	Adgrl2	ADGRL2	0.597938	0.780876
O08992	ENSMUSG00000028249	Sdcbp	SDCBP	2.30412	2.12351
Q99J77	ENSMUSG00000028334	Nans	NANS	0.242268	0.370518
Q9JL04	ENSMUSG00000028354	Fmn2	FMN2	1.15979	1.17131
P10639	ENSMUSG00000028367	Txn1	TXN	5.14433	5.1753
P63037	ENSMUSG00000028410	Dnaja1	DNAJA1	4.74742	5.13944
Q6X893	ENSMUSG00000028412	Slc44a1	SLC44A1	0.793814	0.816733
Q62420	ENSMUSG00000028488	Sh3gl2	SH3GL2	3.80928	4.44223
Q99JY8	ENSMUSG00000028517	Plpp3	PLPP3	3.30928	2.26693
Q8BRK8	ENSMUSG00000028518	Prkaa2	PRKAA2	0.515464	0.533865
P97318	ENSMUSG00000028519	Dab1	DAB1	0.675258	0.498008
Q8VD37-8	ENSMUSG00000028524	Sgip1	SGIP1	2.6134	2.79283
Q80TZ3	ENSMUSG00000028528	Dnajc6	DNAJC6	3.69588	4.15936
P28571-1	ENSMUSG00000028542	Slc6a9	SLC6A9	0.221649	0.250996
Q8BRN9	ENSMUSG00000028582	Cc2d1b	CC2D1B	0.123711	0.171315
P17809	ENSMUSG00000028645	Slc2a1	SLC2A1	1.69588	1.54183
P54763	ENSMUSG00000028664	Ephb2	EPHB2	0.572165	0.800797
P11404	ENSMUSG00000028773	Fabp3	FABP3	6.15979	6.18327
Q8CGM1	ENSMUSG00000028782	Adgrb2	ADGRB2	8.4433	8.91235
P84075	ENSMUSG00000028785	Hpca	HPCA	5.46907	6.0996
O70274	ENSMUSG00000028788	Ptp4a2	PTP4A2	2.6134	2.8008
Q9Z0E0	ENSMUSG00000028833	Ncdn	NCDN	9.4433	8.98805
O35685	ENSMUSG00000028851	Nudc	NUDC	3.22165	3.46215
Q61165	ENSMUSG00000028854	Slc9a1	SLC9A1	0.474227	0.533865
O35495	ENSMUSG00000028926	Cdk14	CDK14	2.29897	2.58566
Q91WG5	ENSMUSG00000028944	Prkag2	PRKAG2	0.412371	0.474104
O35454	ENSMUSG00000029016	Clcn6	CLCN6	0.896907	0.884462
Q505F5	ENSMUSG00000029028	Lrrc47	LRRC47	0.814433	0.87251
P22933	ENSMUSG00000029054	Gabrd	GABRD	3.51546	4.15139
A2AP18-2	ENSMUSG00000029055	Plch2	PLCH2	1.57216	1.69323
P51141	ENSMUSG00000029071	Dvl1	DVL1	1.76804	1.61753
Q8CGE9	ENSMUSG00000029101	Rgs12	RGS12	0.731959	0.52988
P42859	ENSMUSG00000029104	Htt	HTT	1.46907	1.51394
Q9QYC0	ENSMUSG00000029106	Add1	ADD1	3.31443	3.34661
P97441	ENSMUSG00000029151	Slc30a3	SLC30A3	2.42784	3.09562
Q6PER3	ENSMUSG00000029166	Mapre3	MAPRE3	1.8866	2.04382
Q9D6F4	ENSMUSG00000029211	Gabra4	GABRA4	1.66495	2.01594
P50571	ENSMUSG00000029212	Gabrb1	GABRB1	0.262887	0.25498
Q60629	ENSMUSG00000029245	Epha5	EPHA5	1.63402	2.04781
Q8BZM1	ENSMUSG00000029276	Glmn	GLMN	0.304124	0.49004
Q9D394	ENSMUSG00000029291	Rufy3	RUFY3	3.5567	3.39841
Q80VP9	ENSMUSG00000029348	Asphd2	ASPHD2	0.572165	0.677291
Q9JJ59	ENSMUSG00000029408	Abcb9	ABCB9	0.484536	0.549801
Q80U40	ENSMUSG00000029420	Rimbp2	RIMBP2	1.8866	2.06773
P62827	ENSMUSG00000029430	Ran	RAN	5.08247	5.38645
O55143	ENSMUSG00000029467	Atp2a2	ATP2A2	9.40722	9.44622
Q6PHN9	ENSMUSG00000029518	Rab35	RAB35	0.0154639	0.00398406
Q9Z268	ENSMUSG00000029602	Rasal1	RASAL1	1	1.33466
P47708	ENSMUSG00000029608	Rph3a	RPH3A	4.14948	4.23904
Q8C1Y8	ENSMUSG00000029617	Ccz1	CCZ1	0.484536	0.661355
Q61699	ENSMUSG00000029657	Hsph1	HSPH1	5.69072	6.05976
P53668	ENSMUSG00000029674	Limk1	LIMK1	0.613402	0.733068
Q80WC7	ENSMUSG00000029722	Agfg2	AGFG2	0.324742	0.290837
Q80UG2	ENSMUSG00000029765	Plxna4	PLXNA4	1.37629	1.27092
Q80U56	ENSMUSG00000029787	Avl9	AVL9	1.09794	1.33466
Q7TMS5	ENSMUSG00000029802	Abcg2	ABCG2	0.216495	0.195219
Q3TY60-2	ENSMUSG00000029861	Fam131b	FAM131B	1.25258	1.22709
O08644	ENSMUSG00000029869	Ephb6	EPHB6	2.30412	2.65339
Q9QYB8	ENSMUSG00000030000	Add2	ADD2	3.71134	4.251
Q8BYW1	ENSMUSG00000030047	Arhgap25	ARHGAP25	0.0257732	0.0159363
P70232	ENSMUSG00000030077	Chl1	CHL1	3.14433	3.03187
P70206	ENSMUSG00000030084	Plxna1	PLXNA1	0.865979	1.07968
O35316	ENSMUSG00000030096	Slc6a6	SLC6A6	0.510309	0.36255
Q3UH93	ENSMUSG00000030123	Plxnd1	LOC100409974	0.670103	0.729084
Q01097	ENSMUSG00000030209	Grin2b	GRIN2B	0.159794	0.139442
P32883-2	ENSMUSG00000030265	Kras	KRAS	1.51546	1.64143
Q9R0K7	ENSMUSG00000030302	Atp2b2	ATP2B2	8.98969	11.2789
P31650	ENSMUSG00000030307	Slc6a11	SLC6A11	0.469072	0.398406
P31648	ENSMUSG00000030310	Slc6a1	SLC6A1	6.36598	4.44223
Q9CR95	ENSMUSG00000030327	Necap1	NECAP1	2.15979	2.28287
P40240	ENSMUSG00000030342	Cd9	CD9	1.2732	0.85259
Q6PAK3	ENSMUSG00000030350	Prmt8	PRMT8	1	1.27888
Q61838	ENSMUSG00000030359	Pzp	PZP	0	0
Q8K596	ENSMUSG00000030376	Slc8a2	SLC8A2	0.0412371	0.0278884
Q8CIP4-2	ENSMUSG00000030397	Mark4	MARK4	1.1701	1.23506
Q9D3A9	ENSMUSG00000030428	Ttyh1	TTYH1	13.9021	12.988
Q2PFD7	ENSMUSG00000030465	Psd3	PSD3	5.84536	6.36255
Q8BLE7	ENSMUSG00000030500	Slc17a6	SLC17A6	0.0721649	0.0756972
Q2TV84	ENSMUSG00000030523	Trpm1	TRPM1	0	0
Q2WF71	ENSMUSG00000030600	Lrfn1	LRFN1	0.494845	0.729084
Q9D8Y1	ENSMUSG00000030615	Tmem126a	TMEM126A	0.737113	0.772908
Q99N50	ENSMUSG00000030616	Sytl2	SYTL2	1.21649	1.251
Q62421	ENSMUSG00000030638	Sh3gl3	SH3GL3	1	1.14343
Q8BKC5	ENSMUSG00000030662	Ipo5	IPO5	0.860825	1.2988
Q8VDP6	ENSMUSG00000030682	Cdipt	CDIPT	0.685567	0.701195
Q9JMD3	ENSMUSG00000030688	Stard10	STARD10	0.92268	0.896414
P35279	ENSMUSG00000030704	Rab6a	RAB6A	5.33505	5.83665
Q8CAA7	ENSMUSG00000030729	Pgm2l1	PGM2L1	6.42268	7.89243
O35681	ENSMUSG00000030731	Syt3	SYT3	1.2268	0.948207
Q9JIF7	ENSMUSG00000030754	Copb1	COPB1	0.721649	0.824701
O88643	ENSMUSG00000030774	Pak1	PAK1	3.1134	3.77689
Q91W34	ENSMUSG00000030780	Rusf1	RUSF1	0.510309	0.689243
P61264	ENSMUSG00000030806	Stx1b	STX1B	3.78351	3.84462
Q9QZB9	ENSMUSG00000030868	Dctn5	DCTN5	0.242268	0.290837
Q78JW9	ENSMUSG00000030870	Ubfd1	UBFD1	0.860825	1.01195
Q8K221	ENSMUSG00000030881	Arfip2	ARFIP2	0.881443	1.05976
Q91X72	ENSMUSG00000030895	Hpx	HPX	0.00515464	0.00796813
P70302	ENSMUSG00000030987	Stim1	STIM1	0.876289	0.896414
O70589	ENSMUSG00000031012	Cask	CASK	1.19072	1.02789
Q99KG3	ENSMUSG00000031060	Rbm10	RBM10	1.16495	1.30279
A2A432	ENSMUSG00000031095	Cul4b	CUL4B	0.886598	0.908367
P97950	ENSMUSG00000031104	Rab33a	RAB33A	0.582474	0.661355
Q62277	ENSMUSG00000031144	Syp	SYP	11.7629	14.1076
Q9R1Q7	ENSMUSG00000031146	Plp2	PLP2	0.0824742	0.0517928
Q8BHC1	ENSMUSG00000031202	Rab39b	RAB39B	0.582474	0.665339
Q99J31	ENSMUSG00000031214	Ophn1	OPHN1	0.0824742	0.103586
P52795	ENSMUSG00000031217	Efnb1	EFNB1	0.185567	0.155378
Q61249	ENSMUSG00000031221	Igbp1	IGBP1	1.06186	1.12749
P70423	ENSMUSG00000031297	Slc7a3	SLC7A3	0.0309278	0.0199203
P35803	ENSMUSG00000031342	Gpm6b	GPM6B	17.8041	17.4462
P26049	ENSMUSG00000031343	Gabra3	GABRA3	1.1134	1.03187
P70290	ENSMUSG00000031402	Mpp1	MPP1	0.463918	0.47012
P60202	ENSMUSG00000031425	Plp1	PLP1	2.2268	1.67729
Q9D1E8	ENSMUSG00000031467	Agpat5	AGPAT5	1.40206	1.22709
Q91XD6	ENSMUSG00000031479	Vps36	LOC103790647	0.056701	0.0438247
Q9ES28	ENSMUSG00000031511	Arhgef7	ARHGEF7	2.2268	2.66135
P35802	ENSMUSG00000031517	Gpm6a	GPM6A	41.4072	42.0598
Q8R2R9	ENSMUSG00000031539	Ap3m2	AP3M2	2.1134	2.3745
Q9ERS5	ENSMUSG00000031557	Plekha2	PLEKHA2	0.726804	0.749004
P18581	ENSMUSG00000031596	Slc7a2	SLC7A2	0.262887	0.215139
P70677	ENSMUSG00000031628	Casp3	CASP3	0.469072	0.474104
P55288	ENSMUSG00000031673	Cdh11	CDH11	0.876289	0.988048
Q99LG2	ENSMUSG00000031691	Tnpo2	TNPO2	3.06186	3.00398
Q9CX00	ENSMUSG00000031729	Ist1	IST1	1.30928	1.27888
P18872	ENSMUSG00000031748	Gnao1	GNAO1	8.35567	8.2988
P18872-2	ENSMUSG00000031748	Gnao1	GNAO1	8.35567	8.2988
Q99P47	ENSMUSG00000031772	Cntnap4	CNTNAP4	0.195876	0.179283
Q60714	ENSMUSG00000031808	Slc27a1	SLC27A1	0.453608	0.501992
P63011	ENSMUSG00000031840	Rab3a	RAB3A	13.2371	14.6335
Q9JJY3	ENSMUSG00000031906	Smpd3	SMPD3	0.881443	0.784861
Q9Z2D1	ENSMUSG00000031918	Mtmr2	MTMR2	0.293814	0.282869
Q61140	ENSMUSG00000031955	Bcar1	BCAR1	1.78351	1.91235
Q9JI39	ENSMUSG00000031974	Abcb10	ABCB10	0.262887	0.266932
Q9JKF6	ENSMUSG00000032012	Nectin1	NECTIN1	1.34021	1.57769
Q9D5V5	ENSMUSG00000032030	Cul5	CUL5	0.190722	0.306773
Q8BR86	ENSMUSG00000032036	Kirrel3	KIRREL3	0.829897	0.848606
Q8R5M8-4	ENSMUSG00000032076	Cadm1	CADM1	3.46907	3.53386
P56818	ENSMUSG00000032086	Bace1	BACE1	1.95876	2.39841
Q80X80	ENSMUSG00000032120	C2cd2l	C2CD2L	2.76804	2.90837
Q924M7	ENSMUSG00000032306	Mpi	MPI	0.93299	0.912351
Q8VEK0	ENSMUSG00000032328	Tmem30a	TMEM30A	3.83505	4.22311
P97300	ENSMUSG00000032336	Nptn	NPTN	11.6392	13.4143
P97798	ENSMUSG00000032340	Neo1	NEO1	0.603093	0.613546
P97494	ENSMUSG00000032350	Gclc	GCLC	0.865979	0.860558
Q5FW52	ENSMUSG00000032355	Mlip	MLIP	0.304124	0.517928
P97370	ENSMUSG00000032412	Atp1b3	ATP1B3	0.350515	0.247012
Q8R1Q8	ENSMUSG00000032435	Dync1li1	DYNC1LI1	1.90722	2.23904
Q99M51	ENSMUSG00000032475	Nck1	NCK1	0.242268	0.286853
Q71M36	ENSMUSG00000032482	Cspg5	CSPG5	6.90206	6.15936
Q8BH57	ENSMUSG00000032512	Wdr48	WDR48	0.768041	0.729084
P08752	ENSMUSG00000032562	Gnai2	GNAI2	1.99485	1.90438
Q80XR2	ENSMUSG00000032570	Atp2c1	ATP2C1	1.18041	1.39442
O88737	ENSMUSG00000032589	Bsn	BSN	3.59278	3.90837
Q9ESJ4	ENSMUSG00000032598	Nckipsd	NCKIPSD	0.634021	0.713147
P12367	ENSMUSG00000032601	Prkar2a	PRKAR2A	0.365979	0.350598
Q9Z2Z6	ENSMUSG00000032602	Slc25a20	SLC25A20	0.329897	0.2749
Q8BU33	ENSMUSG00000032763	Ilvbl	ILVBL	0.664948	0.605578
P12657	ENSMUSG00000032773	Chrm1	CHRM1	3.84536	4.05578
Q8C8R3-2	ENSMUSG00000032826	Ank2	ANK2	7.19072	8.21514
Q8C8R3-4	ENSMUSG00000032826	Ank2	ANK2	7.19072	8.21514
Q7TN29	ENSMUSG00000032870	Smap2	SMAP2	3.04124	3.21116
Q5SP85	ENSMUSG00000032878	Ccdc85a	CCDC85A	1.98454	2.23904
P53986	ENSMUSG00000032902	Slc16a1	SLC16A1	0.438144	0.326693
Q3UHL1	ENSMUSG00000032936	Camkv	CAMKV	6.13918	5.80876
P70296	ENSMUSG00000032959	Pebp1	PEBP1	17.2474	17.741
Q60780	ENSMUSG00000033066	Gas7	GAS7	6.03608	6.94024
Q68FE2	ENSMUSG00000033124	Atg9a	ATG9A	1.73196	1.72112
Q8VDN2	ENSMUSG00000033161	Atp1a1	ATP1A1	15.8505	18.0956
O35678	ENSMUSG00000033174	Mgll	MGLL	3.01546	2.00398
Q810B7	ENSMUSG00000033214	Slitrk5	SLITRK5	0.989691	1.20717
P47809	ENSMUSG00000033352	Map2k4	MAP2K4	2.22165	2.68924
Q5SSM3	ENSMUSG00000033389	Arhgap44	ARHGAP44	1.94845	2.2749
Q8BRT1	ENSMUSG00000033392	Clasp2	CLASP2	4.5567	4.76096
Q61548	ENSMUSG00000033419	Snap91	SNAP91	4.5	4.27092
Q80ZF8	ENSMUSG00000033569	Adgrb3	ADGRB3	1.86598	2.15139
P63040	ENSMUSG00000033615	Cplx1	CPLX1	3.39691	3.67729
Q8K2C9	ENSMUSG00000033629	Hacd3	HACD3	4.10309	3.86454
Q0P5W1	ENSMUSG00000033653	Vps8	VPS8	0.489691	0.553785
P63080	ENSMUSG00000033676	Gabrb3	GABRB3	3.91237	3.85657
P59281	ENSMUSG00000033697	Arhgap39	ARHGAP39	0.664948	0.697211
Q925N0	ENSMUSG00000033720	Sfxn5	SFXN5	1.06186	0.920319
A6H5Z3	ENSMUSG00000033769	Exoc6b	EXOC6B	0.649485	0.681275
Q8BVE3	ENSMUSG00000033793	Atp6v1h	ATP6V1H	3.94845	4.30279
Q923M0	ENSMUSG00000033819	Ppp1r16a	PPP1R16A	0.391753	0.438247
Q9JL56	ENSMUSG00000033917	Gde1	GDE1	1.89691	1.78884
P58871	ENSMUSG00000033955	Tnks1bp1	TNKS1BP1	0.381443	0.38247
P23819	ENSMUSG00000033981	Gria2	GRIA2	7.77835	8.83267
Q8VDZ4	ENSMUSG00000034075	Zdhhc5	ZDHHC5	0.458763	0.458167
P30999	ENSMUSG00000034101	Ctnnd1	CTNND1	0.701031	0.74502
P30999-2	ENSMUSG00000034101	Ctnnd1	CTNND1	0.701031	0.74502
Q8CBX0	ENSMUSG00000034145	Tmem63c	TMEM63C	0.525773	0.573705
Q8BTX9	ENSMUSG00000034189	Hsdl1	HSDL1	0.329897	0.262948
Q8R1T1	ENSMUSG00000034190	Chmp7	CHMP7	0.510309	0.729084
Q8BQQ1	ENSMUSG00000034265	Zdhhc14	ZDHHC14	1.11856	1.32271
E9PZ19	ENSMUSG00000034275	Igsf9b	IGSF9B	0.0206186	0.0318725
Q76HP3	ENSMUSG00000034310	Tmem132d	TMEM132D	0.685567	1.06773
Q9JIL5	ENSMUSG00000034377	Tulp4	TULP4	1.15979	1.24303
P58802	ENSMUSG00000034412	Tbc1d10a	TBC1D10A	0.690722	0.788845
O70566	ENSMUSG00000034480	Diaph2	DIAPH2	0.201031	0.215139
Q8R1F6	ENSMUSG00000034586	Hid1	HID1	1.02577	1.32271
P97445	ENSMUSG00000034656	Cacna1a	CACNA1A	2.03093	2.42629
A2A699	ENSMUSG00000034685	Fam171a2	FAM171A2	1.22165	1.21514
Q3V0I2	ENSMUSG00000034686	Prr7	PRR7	1.13918	1.19522
Q8C0L0	ENSMUSG00000034723	Tmx4	TMX4	1.09278	1.11554
Q3UHD1	ENSMUSG00000034730	Adgrb1	ADGRB1	4.93299	4.29084
D3YXJ0	ENSMUSG00000034731	Dgkh	DGKH	0.056701	0.0517928
Q91ZZ3	ENSMUSG00000034891	Sncb	SNCB	11.7216	12.8048
O70161	ENSMUSG00000034902	Pip5k1c	PIP5K1C	2.75773	3.15538
Q8C6B2	ENSMUSG00000034930	Rtkn	RTKN	0.350515	0.318725
Q5SV85-2	ENSMUSG00000034940	Synrg	SYNRG	0.221649	0.358566
Q8BHE3	ENSMUSG00000034958	Atcay	ATCAY	3.63402	3.79283
Q91WM6	ENSMUSG00000035104	Eva1a	EVA1A	0.0257732	0.0199203
Q9DBG3	ENSMUSG00000035152	Ap2b1	AP2B1	3.61856	4.10359
Q80VP1	ENSMUSG00000035203	Epn1	EPN1	3.52577	3.48207
Q8C8N2	ENSMUSG00000035236	Scai	SCAI	0.0463918	0.0517928
Q8BVG8	ENSMUSG00000035285	Nat14	NAT14	0.0257732	0.0438247
Q640M6	ENSMUSG00000035314	Gdpd5	GDPD5	0.350515	0.38247
Q5RJI5	ENSMUSG00000035390	Brsk1	BRSK1	2.8299	2.8247
Q8K382	ENSMUSG00000035392	Dennd1a	DENND1A	0.57732	0.709163
A2AWA9	ENSMUSG00000035437	Rabgap1	RABGAP1	1.57216	1.67729
Q9D5R2	ENSMUSG00000035560	Wdr20rt	WDR20	0.231959	0.334661
Q9CQ91	ENSMUSG00000035674	Ndufa3	NDUFA3	6.69072	6.41434
Q91V24	ENSMUSG00000035722	Abca7	ABCA7	0.242268	0.211155
Q8VHK5	ENSMUSG00000035805	Mlc1	MLC1	3.51031	2.72112
Q7TPB0	ENSMUSG00000035835	Plppr3	PLPPR3	0.381443	0.282869
Q9Z0P4	ENSMUSG00000035863	Palm	PALM	6.0567	5.66534
Q9Z0P4-2	ENSMUSG00000035863	Palm	PALM	6.0567	5.66534
P46096	ENSMUSG00000035864	Syt1	SYT1	18.067	21.1434
Q8C7R4	ENSMUSG00000035898	Uba6	UBA6	0.417526	0.282869
Q3TWL2	ENSMUSG00000035953	Pip4p1	PIP4P1	1.06701	0.972112
P59764	ENSMUSG00000035954	Dock4	DOCK4	2.48969	2.98805
Q9JJX7	ENSMUSG00000035958	Tdp2	TDP2	0.0103093	0.0318725
Q6PB44	ENSMUSG00000036057	Ptpn23	PTPN23	0.773196	0.705179
Q80TL4	ENSMUSG00000036062	Phf24	PHF24	4.30928	4.30677
Q3UHK1	ENSMUSG00000036298	Slc2a13	SLC2A13	2.90722	3.19522
Q8R3S6	ENSMUSG00000036435	Exoc1	EXOC1	1.07732	1.08765
Q3UUG6	ENSMUSG00000036473	Tbc1d24	TBC1D24	0.376289	0.517928
Q6ZPE2	ENSMUSG00000036529	Sbf1	SBF1	1.52577	1.47012
Q8BTG7	ENSMUSG00000036564	Ndrg4	NDRG4	14.3608	17.3307
Q6P5F7	ENSMUSG00000036565	Ttyh3	TTYH3	3.77835	3.94422
Q9Z239	ENSMUSG00000036570	Fxyd1	FXYD1	2.40206	1.95219
P59648	ENSMUSG00000036578	Fxyd7	FXYD7	3.3866	3.59363
Q6DFV3	ENSMUSG00000036591	Arhgap21	ARHGAP21	4.19072	3.85259
Q06138	ENSMUSG00000036707	Cab39	CAB39	2.09278	2.22311
Q6NVE8	ENSMUSG00000036769	Wdr44	WDR44	0.329897	0.438247
Q6NXK7	ENSMUSG00000036815	Dpp10	DPP10	0.912371	1.01195
P61226	ENSMUSG00000036894	Rap2b	RAP2B	0.324742	0.418327
Q5FWH7	ENSMUSG00000036949	Slc39a12	SLC39A12	0.335052	0.258964
Q8BPE4	ENSMUSG00000036975	Tmem177	TMEM177	0.0721649	0.063745
Q9QXJ1	ENSMUSG00000037032	Apbb1	APBB1	7.19072	8.06375
Q9JK48	ENSMUSG00000037062	Sh3glb1	SH3GLB1	0.28866	0.346614
O88935	ENSMUSG00000037217	Syn1	SYN1	9.42784	9.95219
A2AAE1	ENSMUSG00000037270	Bltp1	KIAA1109	2.80412	2.78088
Q8BLV3	ENSMUSG00000037341	Slc9a7	SLC9A7	0.0412371	0.0318725
Q924L1	ENSMUSG00000037353	Letmd1	LETMD1	0.242268	0.354582
Q8C522	ENSMUSG00000037419	Endod1	ENDOD1	0.206186	0.290837
Q60738	ENSMUSG00000037434	Slc30a1	SLC30A1	0.654639	0.697211
Q60771	ENSMUSG00000037625	Cldn11	CLDN11	0.319588	0.302789
Q80UP8	ENSMUSG00000037656	Slc20a2	SLC20A2	0.654639	0.860558
P70704-2	ENSMUSG00000037685	Atp8a1	ATP8A1	2.4433	2.58167
Q9CR67	ENSMUSG00000037720	Tmem33	TMEM33	0.927835	1.17131
O35633	ENSMUSG00000037771	Slc32a1	SLC32A1	1.51031	1.03586
P97797-2	ENSMUSG00000037902	Sirpa	LOC100400378	7.33505	7.14741
Q3UH66-3	ENSMUSG00000037989	Wnk2	WNK2	2.51031	2.23904
Q8BZ05	ENSMUSG00000037999	Arap2	ARAP2	0.489691	0.569721
Q8BZA9	ENSMUSG00000038028	Tigar	TIGAR	0.0360825	0.0756972
Q8R366	ENSMUSG00000038034	Igsf8	IGSF8	4.59794	4.53386
Q61923	ENSMUSG00000038077	Kcna6	KCNA6	0.943299	1.0239
P08414	ENSMUSG00000038128	Camk4	CAMK4	1.30928	1.74502
Q8C729-2	ENSMUSG00000038174	Hycc2	FAM126B	1.45876	1.34263
Q6PAM0	ENSMUSG00000038205	Prkab2	PRKAB2	0.164948	0.155378
Q3UHH2	ENSMUSG00000038267	Slc22a23	SLC22A23	0.93299	1.17928
Q61792	ENSMUSG00000038366	Lasp1	LASP1	2.08247	2.15936
Q3UN16	ENSMUSG00000038390	Gpr162	GPR162	4.33505	4.60956
Q9QWI6	ENSMUSG00000038453	Srcin1	SRCIN1	3.25258	3.0239
Q9D8B3	ENSMUSG00000038467	Chmp4b	CHMP4B	3.22165	3.56574
Q9JIS5	ENSMUSG00000038486	Sv2a	SV2A	5.47423	5.84064
Q8VCD6	ENSMUSG00000038555	Reep2	REEP2	3.75258	3.75697
Q9WTQ5	ENSMUSG00000038587	Akap12	AKAP12	0.391753	0.36255
D3YWQ0	ENSMUSG00000038665	Dgki	DGKI	0.453608	0.713147
P56135	ENSMUSG00000038690	Atp5mf	ATP5MF	3.76804	3.67729
Q8K394	ENSMUSG00000038910	Plcl2	PLCL2	0.716495	0.916335
Q8R127	ENSMUSG00000038936	Sccpdh	SCCPDH	0.85567	0.884462
P53612	ENSMUSG00000038975	Rabggtb	RABGGTB	0.458763	0.498008
Q80U95	ENSMUSG00000039000	Ube3c	UBE3C	1.02577	1.13546
Q9D0A3	ENSMUSG00000039043	Arpin	ARPIN	0.154639	0.179283
Q8BX94	ENSMUSG00000039050	Osbpl2	OSBPL2	0.881443	0.749004
P58406	ENSMUSG00000039059	Hrh3	HRH3	0.742268	0.645418
Q52KR3	ENSMUSG00000039126	Prune2	PRUNE2	1.02577	0.87251
Q8BW96	ENSMUSG00000039145	Camk1d	CAMK1D	2.05155	1.72908
O55074	ENSMUSG00000039166	Akap7	AKAP7	0.5	0.350598
Q7M6Y3-5	ENSMUSG00000039361	Picalm	PICALM	1.36598	1.1753
Q9CPW0	ENSMUSG00000039419	Cntnap2	CNTNAP2	3.01546	3.46215
Q80TA6	ENSMUSG00000039458	Mtmr12	MTMR12	0.659794	1.05578
P56695	ENSMUSG00000039474	Wfs1	WFS1	3.36598	4.06375
P13595	ENSMUSG00000039542	Ncam1	NCAM1	7.36598	6.10359
Q6DFV7	ENSMUSG00000039697	Ncoa7	NCOA7	1.42784	1.60956
Q8C561	ENSMUSG00000039704	Lmbrd2	LMBRD2	2.24742	2.63745
Q8K012	ENSMUSG00000039735	Fnbp1l	FNBP1L	1.05155	1.01195
Q9DBE8	ENSMUSG00000039740	Alg2	ALG2	0.175258	0.203187
Q80T41	ENSMUSG00000039809	Gabbr2	GABBR2	6.00515	6.71713
Q8C015	ENSMUSG00000039913	Pak5	PAK5	1.23711	1.75299
Q9WVQ1	ENSMUSG00000040003	Magi2	MAGI2	0.721649	1.03187
O70443	ENSMUSG00000040009	Gnaz	GNAZ	3.97423	4.39442
Q9Z127	ENSMUSG00000040010	Slc7a5	SLC7A5	1.75773	1.34263
G3XA57	ENSMUSG00000040022	Rab11fip2	RAB11FIP2	0.871134	0.924303
P70689	ENSMUSG00000040055	Gjb6	GJB6	0.391753	0.294821
Q66L42	ENSMUSG00000040390	Map3k10	MAP3K10	0.943299	0.796813
Q80TG9	ENSMUSG00000040490	Lrfn2	LRFN2	0.386598	0.513944
Q9R1V6-11	ENSMUSG00000040537	Adam22	ADAM22	1.40722	1.38247
Q3UHE1	ENSMUSG00000040543	Pitpnm3	PITPNM3	2.12887	2
Q8VCY8-2	ENSMUSG00000040563	Plppr2	PLPPR2	4.78351	4.66932
Q9D8Y0	ENSMUSG00000040659	Efhd2	EFHD2	0.510309	0.517928
Q80U28	ENSMUSG00000040687	Madd	MADD	2.91753	3.36255
Q9JKD3	ENSMUSG00000040722	Scamp5	SCAMP5	7.46392	7.34661
P63141	ENSMUSG00000040724	Kcna2	KCNA2	1.41753	1.68127
Q9WUK2	ENSMUSG00000040731	Eif4h	EIF4H	5.63918	5.84064
Q9D6G9	ENSMUSG00000040759	Cmtm5	CMTM5	0.113402	0.111554
Q80XA6	ENSMUSG00000040855	Reps2	REPS2	0.958763	0.932271
S4R1M9	ENSMUSG00000040875	Osbpl10	OSBPL10	0.118557	0.258964
Q9Z0V1	ENSMUSG00000040896	Kcnd3	KCND3	1.30412	1.2988
Q6PIC6	ENSMUSG00000040907	Atp1a3	ATP1A3	5.27835	5.15936
Q8BZZ3	ENSMUSG00000041058	Wwp1	WWP1	0.417526	0.374502
Q80XP9	ENSMUSG00000041245	Wnk3	WNK3	0.118557	0.10757
Q91Z38	ENSMUSG00000041278	Ttc1	TTC1	1.30928	1.36255
P14231	ENSMUSG00000041329	Atp1b2	ATP1B2	4.43299	3.38247
Q80XK6	ENSMUSG00000041341	Atg2b	ATG2B	0.731959	0.840637
Q8CBH5	ENSMUSG00000041439	Mfsd6	MFSD6	0.43299	0.398406
Q811P8	ENSMUSG00000041444	Arhgap32	ARHGAP32	2.03608	2.33068
Q6V4S5	ENSMUSG00000041592	Sdk2	SDK2	0.0618557	0.103586
Q9JM96	ENSMUSG00000041598	Cdc42ep4	CDC42EP4	1.04124	0.844622
Q99NE5	ENSMUSG00000041670	Rims1	RIMS1	1.47938	1.65339
E9Q3L2	ENSMUSG00000041720	Pi4ka	PI4KA	3.92784	3.98008
Q8CGQ8	ENSMUSG00000041771	Slc24a4	SLC24A4	0.0309278	0.0239044
P49446	ENSMUSG00000041836	Ptpre	PTPRE	0.634021	0.633466
Q8CA71	ENSMUSG00000041889	Shisa4	SHISA4	3.7268	3.7012
Q3V1U8	ENSMUSG00000041986	Elmod1	ELMOD1	5.91237	6.58566
Q8C0Q9	ENSMUSG00000041992	Rapgef5	RAPGEF5	1.15464	1.68526
Q3UDP0	ENSMUSG00000042015	Wdr41	WDR41	0.376289	0.406375
Q8BFT9	ENSMUSG00000042078	Svop	SVOP	2.25773	2.4741
Q69ZW3	ENSMUSG00000042302	Ehbp1	EHBP1	1.5567	1.61753
Q8BGR6	ENSMUSG00000042348	Arl15	ARL15	0.365979	0.294821
Q8BXR9	ENSMUSG00000042359	Osbpl6	OSBPL6	0.448454	0.462151
Q3U1Y4	ENSMUSG00000042404	Dennd4b	DENND4B	1.01031	0.788845
Q8BHL3	ENSMUSG00000042492	Tbc1d10b	TBC1D10B	0.835052	0.988048
Q05A62	ENSMUSG00000042523	Dnal1	DNAL1	0.14433	0.203187
Q9D428	ENSMUSG00000042532	Golga7b	GOLGA7B	0.0206186	0.0318725
Q61423	ENSMUSG00000042604	Kcna4	KCNA4	0.252577	0.342629
Q8BHW2	ENSMUSG00000042616	Oscp1	OSCP1	0.345361	0.450199
Q5GH64	ENSMUSG00000042631	Xkr7	XKR7	0.154639	0.171315
Q3UFT3	ENSMUSG00000042680	Garem1	GAREM1	0.623711	0.438247
Q8C0T5	ENSMUSG00000042700	Sipa1l1	SIPA1L1	2.58247	2.86853
Q9D1Q4	ENSMUSG00000042737	Dpm3	DPM3	0.85567	0.681275
Q6I6G8	ENSMUSG00000042807	Hecw2	HECW2	0.907216	1.14741
Q9D920	ENSMUSG00000042992	Borcs5	BORCS5	0.164948	0.258964
Q8CC35	ENSMUSG00000043079	Synpo	SYNPO	0.762887	0.701195
Q8BK08	ENSMUSG00000043284	Tmem11	TMEM11	0.360825	0.414343
Q8BHH2	ENSMUSG00000043463	Rab9b	RAB9B	0.386598	0.553785
Q91Z61	ENSMUSG00000043670	Diras1	DIRAS1	3.36598	3.1992
Q3TIU4	ENSMUSG00000043702	Pde12	PDE12	0.536082	0.693227
P35235-1	ENSMUSG00000043733	Ptpn11	PTPN11	3.10825	3.05578
Q6VNB8	ENSMUSG00000043940	Wdfy3	WDFY3	2.08247	2.33466
Q6PB90	ENSMUSG00000044043	Pcdhb14	PCDHB14	0	0
P52189	ENSMUSG00000044216	Kcnj4	KCNJ4	2.31443	2.58964
Q91XL9	ENSMUSG00000044252	Osbpl1a	OSBPL1A	3.37629	4.04382
P47746	ENSMUSG00000044288	Cnr1	CNR1	5.19588	3.33865
Q9JM63	ENSMUSG00000044708	Kcnj10	KCNJ10	1.05155	0.888446
Q6PD21	ENSMUSG00000044813	Shb	SHB	0.0463918	0.0677291
Q8BH82	ENSMUSG00000044968	Napepld	NAPEPLD	0.180412	0.318725
Q6PE13	ENSMUSG00000045009	Prrt3	PRRT3	0.551546	0.593625
P16054	ENSMUSG00000045038	Prkce	PRKCE	3.45361	3.41434
Q80XU8	ENSMUSG00000045045	Lrfn4	LRFN4	0.860825	0.792829
Q3URE9	ENSMUSG00000045083	Lingo2	LINGO2	0.654639	0.876494
Q91X56	ENSMUSG00000045087	S1pr5	S1PR5	0.0103093	0.0119522
O08530	ENSMUSG00000045092	S1pr1	S1PR1	0.938144	0.756972
Q6RHR9	ENSMUSG00000045095	Magi1	MAGI1	1.89691	2.251
E9PUL5	ENSMUSG00000045114	Prrt2	PRRT2	0.0206186	0.0358566
Q924S7	ENSMUSG00000045671	Spred2	SPRED2	1.62887	1.46614
Q91XV3	ENSMUSG00000045763	Basp1	BASP1	16.4742	18.8247
P97718	ENSMUSG00000045875	Adra1a	ADRA1A	0.134021	0.0956175
Q5HZI2	ENSMUSG00000045912	C2cd4c	C2CD4C	0.376289	0.422311
P83741	ENSMUSG00000045962	Wnk1	WNK1	1.20619	1.18725
Q8C419	ENSMUSG00000045967	Gpr158	GPR158	1.37113	1.68127
Q8BGZ1	ENSMUSG00000046093	Hpcal4	HPCAL4	5.60825	5.84861
Q640R3	ENSMUSG00000046240	Hepacam	HEPACAM	0.891753	0.673307
Q8R3T5	ENSMUSG00000046314	Stxbp6	STXBP6	2.03608	2.05179
Q810B8	ENSMUSG00000046699	Slitrk4	SLITRK4	0.963918	1.37849
Q8K353	ENSMUSG00000046727	Cystm1	CYSTM1	0.438144	0.505976
P53994	ENSMUSG00000047187	Rab2a	RAB2A	6.19588	6.66135
Q9CQW0	ENSMUSG00000047260	Emc6	EMC6	1.00515	1.13147
P06837	ENSMUSG00000047261	Gap43	GAP43	5.50515	5.92829
Q8BLU0	ENSMUSG00000047414	Flrt2	FLRT2	1.01546	1.34661
O88845	ENSMUSG00000047804	Akap10	AKAP10	0.221649	0.266932
Q5PR73	ENSMUSG00000047842	Diras2	DIRAS2	5.38144	6.39044
Q9JMA1	ENSMUSG00000047879	Usp14	USP14	0.613402	0.63745
P16390	ENSMUSG00000047959	Kcna3	KCNA3	0.664948	0.816733
P16388	ENSMUSG00000047976	Kcna1	KCNA1	0.670103	0.756972
Q14CH0-2	ENSMUSG00000048388	Fam171b	FAM171B	1.68557	2.07171
Q8K0V2	ENSMUSG00000048787	Dcun1d3	DCUN1D3	0.293814	0.430279
Q6ZQK5	ENSMUSG00000049076	Acap2	ACAP2	1.04124	0.944223
Q8BHK2	ENSMUSG00000049281	Scn3b	SCN3B	5.83505	7.01992
Q3UMB5	ENSMUSG00000049323	Smcr8	SMCR8	0.412371	0.410359
Q9D1T0	ENSMUSG00000049556	Lingo1	LINGO1	6.24227	7.53386
Q69ZH9	ENSMUSG00000049807	Arhgap23	ARHGAP23	0.00515464	0.00796813
Q80UU9	ENSMUSG00000049940	Pgrmc2	PGRMC2	1.06186	1.23904
P53811	ENSMUSG00000050017	Pitpnb	PITPNB	1.02577	1.29482
Q9D710	ENSMUSG00000050043	Tmx2	TMX2	1.66495	1.77689
Q8C5P7	ENSMUSG00000050052	Tdrp	TDRP	0.458763	0.422311
Q3V3V9-2	ENSMUSG00000050357	Carmil2	CARMIL2	0.953608	0.804781
Q9R1T4	ENSMUSG00000050379	Septin6	SEPTIN6	1.36082	1.48606
Q8K093	ENSMUSG00000050663	Trhde	TRHDE	0.391753	0.633466
P23242	ENSMUSG00000050953	Gja1	GJA1	3.57216	2.46614
Q8C525	ENSMUSG00000051065	Mb21d2	MB21D2	0.402062	0.63745
Q69ZS6	ENSMUSG00000051111	Sv2c	SV2C	0.175258	0.23506
Q9Z1B3	ENSMUSG00000051177	Plcb1	PLCB1	3.46392	5.38247
Q80TF3	ENSMUSG00000051323	Pcdh19	PCDH19	1.2732	1.36255
Q01815	ENSMUSG00000051331	Cacna1c	CACNA1C	0.536082	0.673307
Q8BRV5	ENSMUSG00000051339	2900026A02Rik	KIAA1671	1.01546	1
Q91X97	ENSMUSG00000051359	Ncald	NCALD	6.58763	8.46215
Q5DTY9	ENSMUSG00000051401	Kctd16	KCTD16	0.0979381	0.12749
Q8CJ19	ENSMUSG00000051586	Mical3	MICAL3	0.0412371	0.0517928
Q80ZJ1	ENSMUSG00000051615	Rap2a	RAP2A	2.48969	3.1992
Q8CCA0	ENSMUSG00000051674	Dcun1d4	DCUN1D4	0.984536	0.89243
P60335	ENSMUSG00000051695	Pcbp1	PCBP1	3.91237	4.13546
Q69ZK9	ENSMUSG00000051790	Nlgn2	NLGN2	2.30928	2.62948
Q5GH67	ENSMUSG00000051951	Xkr4	XKR4	2.42784	2.0757
Q6PGE7	ENSMUSG00000052026	Slc6a7	SLC6A7	0.520619	0.641434
P97492	ENSMUSG00000052087	Rgs14	RGS14	0.768041	0.804781
O88910	ENSMUSG00000052373	Mpp3	MPP3	0.175258	0.258964
P50516	ENSMUSG00000052459	Atp6v1a	ATP6V1A	5.62371	5.78884
Q7TPD3	ENSMUSG00000052516	Robo2	ROBO2	1.81959	1.51793
Q9DC53	ENSMUSG00000052560	Cpne8	CPNE8	0.706186	0.928287
Q91XM9-7	ENSMUSG00000052572	Dlg2	DLG2	0.175258	0.135458
Q8BG39	ENSMUSG00000053025	Sv2b	SV2B	5.91753	6.88845
Q69Z98	ENSMUSG00000053046	Brsk2	BRSK2	2.15464	2.21116
Q9CQ10	ENSMUSG00000053119	Chmp3	CHMP3	2.3866	2.39044
Q91ZR1	ENSMUSG00000053291	Rab4b	RAB4B	0.963918	0.956175
Q8VHW2	ENSMUSG00000053395	Cacng8	CACNG8	0.0515464	0.111554
A2A690	ENSMUSG00000053580	Tanc2	TANC2	1.56701	2.13147
O89032	ENSMUSG00000053617	Sh3pxd2a	SH3PXD2A	0.510309	0.896414
Q9R1L5	ENSMUSG00000053693	Mast1	MAST1	2.70619	2.60159
Q9DC07	ENSMUSG00000053702	Nebl	NEBL	1.40206	1.47809
Q8BSS9	ENSMUSG00000053825	Ppfia2	PPFIA2	4.43299	4.68127
Q0VBF8	ENSMUSG00000053963	Stum	STUM	2.58763	2.62151
Q80TJ1-2	ENSMUSG00000054423	Cadps	CADPS	1.95876	2.25896
Q9QY76	ENSMUSG00000054455	Vapb	VAPB	1.7732	1.95618
P62761	ENSMUSG00000054459	Vsnl1	VSNL1	26.0258	30.1912
P70414	ENSMUSG00000054640	Slc8a1	SLC8A1	2.06701	1.79681
Q2M3X8	ENSMUSG00000054728	Phactr1	PHACTR1	3.94845	4.20319
Q9D6Y7	ENSMUSG00000054733	Msra	MSRA	0.35567	0.366534
Q8R464	ENSMUSG00000054793	Cadm4	CADM4	2.70103	2.29084
O70400	ENSMUSG00000055044	Pdlim1	PDLIM1	0.0206186	0.0278884
P15209	ENSMUSG00000055254	Ntrk2	NTRK2	9.86082	8.97211
O55192	ENSMUSG00000055368	Slc6a2	SLC6A2	0.0154639	0.00796813
Q61735	ENSMUSG00000055447	Cd47	CD47	3.9433	4.08765
Q61735-2	ENSMUSG00000055447	Cd47	CD47	3.9433	4.08765
Q61285	ENSMUSG00000055782	Abcd2	ABCD2	0.360825	0.557769
Q9JL26	ENSMUSG00000055805	Fmnl1	FMNL1	1.28351	1.4502
P62869	ENSMUSG00000055839	Elob	ELOB	9.41753	8.87649
P39087	ENSMUSG00000056073	Grik2	GRIK2	1.06186	0.760956
Q8K3F6	ENSMUSG00000056258	Kcnq3	KCNQ3	2.24742	2.36255
Q5DTN8	ENSMUSG00000056856	Jakmip3	JAKMIP3	0.00515464	0.00796813
Q921C1	ENSMUSG00000056966	Gjc3	GJE1	0	0
Q2NL51	ENSMUSG00000057177	Gsk3a	GSK3A	2.73196	2.94422
Q8BY89	ENSMUSG00000057193	Slc44a2	SLC44A2	1.3866	1.33865
Q3UHJ0	ENSMUSG00000057230	Aak1	AAK1	3.40206	3.66534
B2RSH2	ENSMUSG00000057614	Gnai1	GNAI1	1.46392	1.47809
Q8C1B7	ENSMUSG00000058013	Septin11	SEPTIN11	2.31959	2.68924
Q05BC3	ENSMUSG00000058070	Eml1	EML1	0.695876	0.721116
Q9CZB0	ENSMUSG00000058076	Sdhc	SDHC	1.79897	1.62948
Q60603	ENSMUSG00000058248	Kcnh1	KCNH1	0.886598	1.21514
Q62283	ENSMUSG00000058254	Tspan7	TSPAN7	22.1598	21.2271
Q920M7	ENSMUSG00000058420	Syt17	SYT17	1.45876	1.50996
Q6IMP4	ENSMUSG00000058441	Panx2	PANX2	0.706186	0.665339
Q8BGD9	ENSMUSG00000058655	Eif4b	EIF4B	1.47938	1.39442
P15388	ENSMUSG00000058975	Kcnc1	KCNC1	0.840206	1
P35436	ENSMUSG00000059003	Grin2a	GRIN2A	4.78351	6.13147
Q9QZS8	ENSMUSG00000059013	Sh2d3c	SH2D3C	0.309278	0.430279
Q78ZA7	ENSMUSG00000059119	Nap1l4	NAP1L4	2.04639	2.13944
Q6VNS1	ENSMUSG00000059146	Ntrk3	NTRK3	1.27835	1.50199
Q6PDC8	ENSMUSG00000059149	Mfsd4a	MFSD4A	1.44845	1.66534
Q61481	ENSMUSG00000059173	Pde1a	PDE1A	2.52062	2.69721
Q80UG5	ENSMUSG00000059248	Septin9	SEPTIN9	0.0309278	0
Q91VE0	ENSMUSG00000059316	Slc27a4	SLC27A4	0.773196	0.960159
Q3UJP5	ENSMUSG00000059482	Cfap418	C16H8orf37	0.00515464	0.0119522
O08917	ENSMUSG00000059714	Flot1	FLOT1	2.39175	2.77291
O08747	ENSMUSG00000059921	Unc5c	UNC5C	0.304124	0.2749
P17156	ENSMUSG00000059970	Hspa2	HSPA2	0.582474	0.776892
Q9EPK2	ENSMUSG00000060090	Rp2	RP2	0	0.00398406
P17426	ENSMUSG00000060279	Ap2a1	AP2A1	2.08763	2.41434
P70211	ENSMUSG00000060534	Dcc	DCC	0.0927835	0.063745
Q9Z0V2	ENSMUSG00000060882	Kcnd2	KCND2	0.829897	0.928287
O88343	ENSMUSG00000060961	Slc4a4	SLC4A4	1.46392	1.39841
P61924	ENSMUSG00000060992	Copz1	COPZ1	1.59278	1.53386
Q9Z218	ENSMUSG00000061576	Dpp6	DPP6	3.63402	3.95219
Q9QYX7	ENSMUSG00000061601	Pclo	PCLO	3.62887	3.5498
Q9CRY7	ENSMUSG00000061666	Gdpd1	GDPD1	0.0257732	0.0199203
B1AZP2-2	ENSMUSG00000061689	Dlgap4	DLGAP4	1.69588	1.78884
A2CG49	ENSMUSG00000061751	Kalrn	KALRN	4.64948	4.60558
Q60634	ENSMUSG00000061981	Flot2	FLOT2	1.35052	1.25498
Q9JJK2	ENSMUSG00000062190	Lancl2	LANCL2	2.28351	2.66932
Q8CHG7	ENSMUSG00000062232	Rapgef2	RAPGEF2	2.09278	2.0757
Q99KY4	ENSMUSG00000062234	Gak	GAK	0.701031	0.876494
Q4VAE3	ENSMUSG00000062373	Tmem65	TMEM65	1.11856	1.15139
Q8BNY6	ENSMUSG00000062661	Ncs1	NCS1	9.5	8.69721
Q63959	ENSMUSG00000062785	Kcnc3	KCNC3	0.556701	0.749004
Q61301	ENSMUSG00000063063	Ctnna2	CTNNA2	2.91753	3.98805
Q08460	ENSMUSG00000063142	Kcnma1	KCNMA1	2.49485	2.69323
O08919	ENSMUSG00000063160	Numbl	NUMBL	1.51546	1.52191
Q68EF4	ENSMUSG00000063239	Grm4	GRM4	0.0773196	0.0836653
Q68FD9	ENSMUSG00000063455	D630045J12Rik	KIAA1549	0.649485	0.956175
Q5DU31	ENSMUSG00000064065	Ipcef1	IPCEF1	0.443299	0.450199
Q3TWN3	ENSMUSG00000064105	Cnnm2	CNNM2	0.237113	0.262948
Q8BLQ9	ENSMUSG00000064115	Cadm2	CADM2	4.77835	6.30677
P00397	ENSMUSG00000064351	mt-Co1	COX1	33.5	28.4622
P03930	ENSMUSG00000064356	mt-Atp8	ATP8	24.567	18.3745
P03911	ENSMUSG00000064363	mt-Nd4	ND4	191.356	194.275
P00158	ENSMUSG00000064370	mt-Cytb	CYTB	166.026	163.829
Q6Y685	ENSMUSG00000065954	Tacc1	TACC1	2.26804	2.5498
A2AN08	ENSMUSG00000066036	Ubr4	UBR4	1.31959	1.14343
Q9JJV5	ENSMUSG00000066189	Cacng3	CACNG3	4.84021	6.01195
Q9EPL8	ENSMUSG00000066232	Ipo7	IPO7	2	1.81275
P07758	ENSMUSG00000066366	Serpina1a	SERPINA1	0.0876289	0.0756972
Q9D164	ENSMUSG00000066705	Fxyd6	FXYD6	8.68041	7.49801
O55033	ENSMUSG00000066877	Nck2	NCK2	0.871134	1.05179
O35607	ENSMUSG00000067336	Bmpr2	BMPR2	2.55155	3.01594
O70401	ENSMUSG00000067377	Tspan6	TSPAN6	0.226804	0.167331
Q9QZQ1	ENSMUSG00000068036	Afdn	AFDN	1.45876	1.53785
O35682	ENSMUSG00000068566	Myadm	MYADM	0.242268	0.2749
Q9DAZ9	ENSMUSG00000068580	Zfyve19	ZFYVE19	0.396907	0.354582
Q3V132	ENSMUSG00000069041	Slc25a31	SLC25A31	0.00515464	0.00796813
Q8BXR1	ENSMUSG00000069072	Slc7a14	SLC7A14	1.03608	0.828685
Q91W52	ENSMUSG00000069520	Tmem19	TMEM19	0.0360825	0.0438247
Q8CFE4	ENSMUSG00000069539	Scyl2	SCYL2	0.474227	0.593625
G5E8K5	ENSMUSG00000069601	Ank3	ANK3	1.73711	2.03586
Q3UUJ4	ENSMUSG00000069631	Strada	STRADA	0.340206	0.50996
Q4PNJ2	ENSMUSG00000069670	Nkain2	NKAIN2	1.94845	2.14741
D3YVE8	ENSMUSG00000070287	Slc35g2	SLC35G2	0.365979	0.474104
Q56A07	ENSMUSG00000070304	Scn2b	SCN2B	2.08247	2.10359
Q3TXX4	ENSMUSG00000070570	Slc17a7	SLC17A7	18.9845	21.5179
O70585	ENSMUSG00000071454	Dtnb	DTNB	0.582474	0.593625
Q78IK2	ENSMUSG00000071528	Atp5mk	ATP5MD	2.97938	2.50598
Q6P8I4	ENSMUSG00000071533	Pcnp	PCNP	2.19072	2.12351
Q149F3	ENSMUSG00000071723	Gspt2	GSPT2	0.283505	0.338645
Q9Z2Q6	ENSMUSG00000072214	Septin5	SEPTIN5	11.8093	11.3227
P14576	ENSMUSG00000073079	Srp54a	SRP54	0.417526	0.74502
Q8C4X2	ENSMUSG00000073563	Csnk1g3	CSNK1G3	0.417526	0.525896
Q6PGF7	ENSMUSG00000074030	Exoc8	EXOC8	0.268041	0.394422
Q3UZP4	ENSMUSG00000074093	Svip	SVIP	0.628866	0.59761
Q69Z38	ENSMUSG00000074305	Peak1	PEAK1	0.479381	0.434263
Q8C166	ENSMUSG00000074643	Cpne1	LOC100389040	0.824742	0.936255
Q99L45	ENSMUSG00000074656	Eif2s2	EIF2S2	1.45876	1.31474
Q9QZC2	ENSMUSG00000074785	Plxnc1	PLXNC1	0.458763	0.533865
A2AHL1	ENSMUSG00000074968	Ano3	ANO3	2.60825	2.41434
Q80TY0	ENSMUSG00000075415	Fnbp1	FNBP1	0.876289	0.884462
Q61885	ENSMUSG00000076439	Mog	MOG	0.0412371	0.0278884
A2ARS0	ENSMUSG00000078137	Ankrd63	ANKRD63	0.164948	0.231076
Q9CQ80	ENSMUSG00000078656	Vps25	VPS25	0.896907	0.864542
P51150	ENSMUSG00000079477	Rab7	RAB7A	0.742268	0.697211
P0C7M9	ENSMUSG00000079598	Clec2l	CLEC2L	1.13402	0.876494
P70345	ENSMUSG00000089682	Bcl2l2	LOC100396934	3.45876	3.40239
Q9JKZ2	ENSMUSG00000089774	Slc5a3	SLC5A3	0.489691	0.525896
Q8BR92	ENSMUSG00000090053	Pakap	PALM2AKAP2	1.69588	1.68127
Q99MX7	ENSMUSG00000094626	Tmem121b	TMEM121B	1.10309	1.36255
Q61743	ENSMUSG00000096146	Kcnj11	KCNJ11	0.149485	0.155378
Q8CJ61	ENSMUSG00000096188	Cmtm4	CMTM4	2.25773	2.41833
Q91XY4	ENSMUSG00000103677	Pcdhga4	LOC100401450	8.35567	7.78884
O88689-3	ENSMUSG00000104252	Pcdha4	LOC100398424	2.05155	2.31076
Q80TE7	ENSMUSG00000104597	Lrrc7	LRRC7	0.829897	1.05578
P98203	ENSMUSG00000118669	Arvcf	ARVCF	0.762887	0.629482
P70280		Vamp7	VAMP7	0.582474	0.741036
