# Supplementary material
Source: Research Square preprint supplement (doi:10.21203/rs.3.rs-8597698/v1)
Supplement: Supplementary file 6 [file 4c5c26ef1e71a3cbab46b720.xlsx]

## Sheet: Sheet1
Disease annotations for identified disease-associated proteins
uniprotID	mouseGeneSymbol	DOID	Description
A2A432	Cul4b	DOID:1059	intellectual_disability
A2A690	Tanc2	DOID:9255	frontotemporal_dementia
A2A699	Fam171a2	DOID:1307	dementia
A2A699	Fam171a2	DOID:1561	cognitive_disorder
A2A699	Fam171a2	DOID:9255	frontotemporal_dementia
A2AN08	Ubr4	DOID:1059	intellectual_disability
A2AP18-2	Plch2	DOID:1561	cognitive_disorder
A2AP18-2	Plch2	DOID:2468	psychotic_disorder
A2AP18-2	Plch2	DOID:5419	schizophrenia
A2APX8	Scn1a	DOID:1059	intellectual_disability
A2APX8	Scn1a	DOID:1094	attention_deficit_hyperactivity_disorder
A2APX8	Scn1a	DOID:12849	autistic_disorder
A2APX8	Scn1a	DOID:14320	generalized_anxiety_disorder
A2APX8	Scn1a	DOID:1561	cognitive_disorder
A2APX8	Scn1a	DOID:2030	anxiety_disorder
A2ARS0	Ankrd63	DOID:1561	cognitive_disorder
A2ARS0	Ankrd63	DOID:2468	psychotic_disorder
A2ARS0	Ankrd63	DOID:5419	schizophrenia
A2CG49	Kalrn	DOID:1561	cognitive_disorder
A2CG49	Kalrn	DOID:2468	psychotic_disorder
A2CG49	Kalrn	DOID:5419	schizophrenia
A6H5Z3	Exoc6b	DOID:1059	intellectual_disability
A6H5Z3	Exoc6b	DOID:1561	cognitive_disorder
A6H5Z3	Exoc6b	DOID:2468	psychotic_disorder
A6H5Z3	Exoc6b	DOID:5419	schizophrenia
B1AWN6	Scn2a	DOID:1059	intellectual_disability
B1AWN6	Scn2a	DOID:12849	autistic_disorder
B1AWN6	Scn2a	DOID:1561	cognitive_disorder
B1AWN6	Scn2a	DOID:2468	psychotic_disorder
B1AWN6	Scn2a	DOID:5419	schizophrenia
B2RSH2	Gnai1	DOID:9255	frontotemporal_dementia
D3YVE8	Slc35g2	DOID:1561	cognitive_disorder
D3YVE8	Slc35g2	DOID:2468	psychotic_disorder
D3YVE8	Slc35g2	DOID:5419	schizophrenia
D3YWQ0	Dgki	DOID:1561	cognitive_disorder
D3YWQ0	Dgki	DOID:2468	psychotic_disorder
D3YWQ0	Dgki	DOID:5419	schizophrenia
D3YXJ0	Dgkh	DOID:1561	cognitive_disorder
D3YXJ0	Dgkh	DOID:1595	endogenous_depression
D3YXJ0	Dgkh	DOID:1596	mental_depression
D3YXJ0	Dgkh	DOID:2468	psychotic_disorder
D3YXJ0	Dgkh	DOID:3312	bipolar_disorder
D3YXJ0	Dgkh	DOID:3324	mood_disorder
D3YXJ0	Dgkh	DOID:5419	schizophrenia
E9PUL5	Prrt2	DOID:9255	frontotemporal_dementia
E9PZ19	Igsf9b	DOID:1561	cognitive_disorder
E9PZ19	Igsf9b	DOID:2468	psychotic_disorder
E9PZ19	Igsf9b	DOID:5419	schizophrenia
E9Q3L2	Pi4ka	DOID:1561	cognitive_disorder
E9Q3L2	Pi4ka	DOID:2468	psychotic_disorder
E9Q3L2	Pi4ka	DOID:5419	schizophrenia
G3XA57	Rab11fip2	DOID:1094	attention_deficit_hyperactivity_disorder
G5E8K5	Ank3	DOID:1059	intellectual_disability
G5E8K5	Ank3	DOID:1094	attention_deficit_hyperactivity_disorder
G5E8K5	Ank3	DOID:12849	autistic_disorder
G5E8K5	Ank3	DOID:1470	major_depressive_disorder
G5E8K5	Ank3	DOID:1561	cognitive_disorder
G5E8K5	Ank3	DOID:1595	endogenous_depression
G5E8K5	Ank3	DOID:1596	mental_depression
G5E8K5	Ank3	DOID:2468	psychotic_disorder
G5E8K5	Ank3	DOID:3312	bipolar_disorder
G5E8K5	Ank3	DOID:3324	mood_disorder
G5E8K5	Ank3	DOID:5419	schizophrenia
O08539	Bin1	DOID:1307	dementia
O08539	Bin1	DOID:1561	cognitive_disorder
O08599	Stxbp1	DOID:1059	intellectual_disability
O08599	Stxbp1	DOID:1561	cognitive_disorder
O08599	Stxbp1	DOID:2468	psychotic_disorder
O08599	Stxbp1	DOID:5419	schizophrenia
O08599	Stxbp1	DOID:9255	frontotemporal_dementia
O08747	Unc5c	DOID:1094	attention_deficit_hyperactivity_disorder
O35375	Nrp2	DOID:1094	attention_deficit_hyperactivity_disorder
O35375	Nrp2	DOID:12849	autistic_disorder
O35454	Clcn6	DOID:1561	cognitive_disorder
O35454	Clcn6	DOID:2468	psychotic_disorder
O35454	Clcn6	DOID:5419	schizophrenia
O35526	Stx1a	DOID:1094	attention_deficit_hyperactivity_disorder
O35526	Stx1a	DOID:12217	Lewy_body_dementia
O35526	Stx1a	DOID:12849	autistic_disorder
O35526	Stx1a	DOID:1307	dementia
O35526	Stx1a	DOID:1561	cognitive_disorder
O35526	Stx1a	DOID:2468	psychotic_disorder
O35526	Stx1a	DOID:3312	bipolar_disorder
O35526	Stx1a	DOID:3324	mood_disorder
O35526	Stx1a	DOID:5419	schizophrenia
O35526	Stx1a	DOID:9255	frontotemporal_dementia
O35633	Slc32a1	DOID:1561	cognitive_disorder
O35633	Slc32a1	DOID:2468	psychotic_disorder
O35633	Slc32a1	DOID:5419	schizophrenia
O35874	Slc1a4	DOID:1561	cognitive_disorder
O35874	Slc1a4	DOID:2468	psychotic_disorder
O35874	Slc1a4	DOID:5419	schizophrenia
O35927	Ctnnd2	DOID:1059	intellectual_disability
O35927	Ctnnd2	DOID:12217	Lewy_body_dementia
O35927	Ctnnd2	DOID:1307	dementia
O35927	Ctnnd2	DOID:1561	cognitive_disorder
O35927	Ctnnd2	DOID:2468	psychotic_disorder
O35927	Ctnnd2	DOID:3312	bipolar_disorder
O35927	Ctnnd2	DOID:3324	mood_disorder
O35927	Ctnnd2	DOID:5419	schizophrenia
O54991	Cntnap1	DOID:9255	frontotemporal_dementia
O55033	Nck2	DOID:1307	dementia
O55033	Nck2	DOID:1561	cognitive_disorder
O55042	Snca	DOID:12217	Lewy_body_dementia
O55042	Snca	DOID:1307	dementia
O55042	Snca	DOID:1561	cognitive_disorder
O55042	Snca	DOID:1596	mental_depression
O55042	Snca	DOID:2468	psychotic_disorder
O55042	Snca	DOID:3324	mood_disorder
O55042	Snca	DOID:535	sleep_disorder
O55042	Snca	DOID:5419	schizophrenia
O55042	Snca	DOID:9091	REM_sleep_behavior_disorder
O55100	Syngr1	DOID:1561	cognitive_disorder
O55100	Syngr1	DOID:2468	psychotic_disorder
O55100	Syngr1	DOID:3312	bipolar_disorder
O55100	Syngr1	DOID:3324	mood_disorder
O55100	Syngr1	DOID:5419	schizophrenia
O55106	Strn	DOID:1561	cognitive_disorder
O55106	Strn	DOID:2468	psychotic_disorder
O55106	Strn	DOID:5419	schizophrenia
O55131	Septin7	DOID:1561	cognitive_disorder
O55131	Septin7	DOID:2468	psychotic_disorder
O55131	Septin7	DOID:5419	schizophrenia
O55143	Atp2a2	DOID:1561	cognitive_disorder
O55143	Atp2a2	DOID:2468	psychotic_disorder
O55143	Atp2a2	DOID:5419	schizophrenia
O55192	Slc6a2	DOID:1094	attention_deficit_hyperactivity_disorder
O55192	Slc6a2	DOID:1470	major_depressive_disorder
O55192	Slc6a2	DOID:1561	cognitive_disorder
O55192	Slc6a2	DOID:1595	endogenous_depression
O55192	Slc6a2	DOID:1596	mental_depression
O55192	Slc6a2	DOID:2030	anxiety_disorder
O55192	Slc6a2	DOID:2468	psychotic_disorder
O55192	Slc6a2	DOID:3312	bipolar_disorder
O55192	Slc6a2	DOID:3324	mood_disorder
O55192	Slc6a2	DOID:5419	schizophrenia
O55192	Slc6a2	DOID:591	phobic_disorder
O55192	Slc6a2	DOID:593	agoraphobia
O55192	Slc6a2	DOID:594	panic_disorder
O70172	Pip4k2a	DOID:1561	cognitive_disorder
O70172	Pip4k2a	DOID:2468	psychotic_disorder
O70172	Pip4k2a	DOID:5419	schizophrenia
O70228	Atp9a	DOID:10933	obsessive-compulsive_disorder
O70228	Atp9a	DOID:1561	cognitive_disorder
O70228	Atp9a	DOID:2030	anxiety_disorder
O70401	Tspan6	DOID:1059	intellectual_disability
O70566	Diaph2	DOID:1470	major_depressive_disorder
O70566	Diaph2	DOID:1561	cognitive_disorder
O70566	Diaph2	DOID:1595	endogenous_depression
O70566	Diaph2	DOID:1596	mental_depression
O70566	Diaph2	DOID:3324	mood_disorder
O70589	Cask	DOID:1059	intellectual_disability
O88343	Slc4a4	DOID:1059	intellectual_disability
O88602	Cacng2	DOID:1059	intellectual_disability
O88643	Pak1	DOID:1561	cognitive_disorder
O88643	Pak1	DOID:2468	psychotic_disorder
O88643	Pak1	DOID:5419	schizophrenia
O88704	Hcn1	DOID:1561	cognitive_disorder
O88704	Hcn1	DOID:2468	psychotic_disorder
O88704	Hcn1	DOID:5419	schizophrenia
O88737	Bsn	DOID:1561	cognitive_disorder
O88737	Bsn	DOID:2468	psychotic_disorder
O88737	Bsn	DOID:5419	schizophrenia
O88935	Syn1	DOID:12849	autistic_disorder
O88935	Syn1	DOID:1561	cognitive_disorder
O88935	Syn1	DOID:2468	psychotic_disorder
O88935	Syn1	DOID:5419	schizophrenia
O89026	Robo1	DOID:1561	cognitive_disorder
O89026	Robo1	DOID:2468	psychotic_disorder
O89026	Robo1	DOID:5419	schizophrenia
O89032	Sh3pxd2a	DOID:1094	attention_deficit_hyperactivity_disorder
O89032	Sh3pxd2a	DOID:12849	autistic_disorder
O89032	Sh3pxd2a	DOID:1470	major_depressive_disorder
O89032	Sh3pxd2a	DOID:1561	cognitive_disorder
O89032	Sh3pxd2a	DOID:1595	endogenous_depression
O89032	Sh3pxd2a	DOID:1596	mental_depression
O89032	Sh3pxd2a	DOID:2468	psychotic_disorder
O89032	Sh3pxd2a	DOID:3312	bipolar_disorder
O89032	Sh3pxd2a	DOID:3324	mood_disorder
O89032	Sh3pxd2a	DOID:5419	schizophrenia
P00397	mt-Co1	DOID:1059	intellectual_disability
P05132	Prkaca	DOID:1561	cognitive_disorder
P05132	Prkaca	DOID:9255	frontotemporal_dementia
P05480	Src	DOID:12849	autistic_disorder
P05532	Kit	DOID:1561	cognitive_disorder
P05532	Kit	DOID:3312	bipolar_disorder
P05532	Kit	DOID:3324	mood_disorder
P06745	Gpi1	DOID:9255	frontotemporal_dementia
P06837	Gap43	DOID:10933	obsessive-compulsive_disorder
P06837	Gap43	DOID:1561	cognitive_disorder
P06837	Gap43	DOID:2030	anxiety_disorder
P06837	Gap43	DOID:2468	psychotic_disorder
P06837	Gap43	DOID:5419	schizophrenia
P07758	Serpina1a	DOID:1307	dementia
P07758	Serpina1a	DOID:1561	cognitive_disorder
P07758	Serpina1a	DOID:2468	psychotic_disorder
P07758	Serpina1a	DOID:5419	schizophrenia
P08414	Camk4	DOID:1059	intellectual_disability
P08414	Camk4	DOID:12849	autistic_disorder
P08752	Gnai2	DOID:1470	major_depressive_disorder
P08752	Gnai2	DOID:1561	cognitive_disorder
P08752	Gnai2	DOID:1595	endogenous_depression
P08752	Gnai2	DOID:1596	mental_depression
P08752	Gnai2	DOID:3324	mood_disorder
P09055	Itgb1	DOID:1561	cognitive_disorder
P09055	Itgb1	DOID:3312	bipolar_disorder
P09055	Itgb1	DOID:3324	mood_disorder
P10637	Mapt	DOID:11870	Pick's_disease
P10637	Mapt	DOID:12217	Lewy_body_dementia
P10637	Mapt	DOID:1307	dementia
P10637	Mapt	DOID:1561	cognitive_disorder
P10637	Mapt	DOID:2468	psychotic_disorder
P10637	Mapt	DOID:5419	schizophrenia
P10637	Mapt	DOID:8725	vascular_dementia
P10637	Mapt	DOID:9255	frontotemporal_dementia
P10639	Txn1	DOID:1561	cognitive_disorder
P10639	Txn1	DOID:2468	psychotic_disorder
P10639	Txn1	DOID:5419	schizophrenia
P10852	Slc3a2	DOID:9255	frontotemporal_dementia
P11404	Fabp3	DOID:12849	autistic_disorder
P11404	Fabp3	DOID:1307	dementia
P11404	Fabp3	DOID:1561	cognitive_disorder
P11404	Fabp3	DOID:2468	psychotic_disorder
P11404	Fabp3	DOID:3312	bipolar_disorder
P11404	Fabp3	DOID:3324	mood_disorder
P11404	Fabp3	DOID:5419	schizophrenia
P11404	Fabp3	DOID:8725	vascular_dementia
P12657	Chrm1	DOID:1561	cognitive_disorder
P12657	Chrm1	DOID:2468	psychotic_disorder
P12657	Chrm1	DOID:5419	schizophrenia
P13595	Ncam1	DOID:12849	autistic_disorder
P13595	Ncam1	DOID:1561	cognitive_disorder
P13595	Ncam1	DOID:2468	psychotic_disorder
P13595	Ncam1	DOID:3312	bipolar_disorder
P13595	Ncam1	DOID:3324	mood_disorder
P13595	Ncam1	DOID:5419	schizophrenia
P14094	Atp1b1	DOID:1307	dementia
P14094	Atp1b1	DOID:1561	cognitive_disorder
P14094	Atp1b1	DOID:8725	vascular_dementia
P15116	Cdh2	DOID:1561	cognitive_disorder
P15116	Cdh2	DOID:3312	bipolar_disorder
P15116	Cdh2	DOID:3324	mood_disorder
P15209	Ntrk2	DOID:1229	paranoid_schizophrenia
P15209	Ntrk2	DOID:12849	autistic_disorder
P15209	Ntrk2	DOID:1561	cognitive_disorder
P15209	Ntrk2	DOID:2468	psychotic_disorder
P15209	Ntrk2	DOID:3312	bipolar_disorder
P15209	Ntrk2	DOID:3324	mood_disorder
P15209	Ntrk2	DOID:5419	schizophrenia
P15388	Kcnc1	DOID:1561	cognitive_disorder
P15388	Kcnc1	DOID:2468	psychotic_disorder
P15388	Kcnc1	DOID:5419	schizophrenia
P16390	Kcna3	DOID:1561	cognitive_disorder
P16390	Kcna3	DOID:2030	anxiety_disorder
P16390	Kcna3	DOID:594	panic_disorder
P17426	Ap2a1	DOID:9255	frontotemporal_dementia
P17427	Ap2a2	DOID:9255	frontotemporal_dementia
P17809	Slc2a1	DOID:1561	cognitive_disorder
P17809	Slc2a1	DOID:2468	psychotic_disorder
P17809	Slc2a1	DOID:5419	schizophrenia
P18052	Ptpra	DOID:12849	autistic_disorder
P18052	Ptpra	DOID:1561	cognitive_disorder
P18052	Ptpra	DOID:2468	psychotic_disorder
P18052	Ptpra	DOID:5419	schizophrenia
P18581	Slc7a2	DOID:1094	attention_deficit_hyperactivity_disorder
P21995	Emb	DOID:1561	cognitive_disorder
P21995	Emb	DOID:2468	psychotic_disorder
P21995	Emb	DOID:5419	schizophrenia
P22723	Gabrg2	DOID:12849	autistic_disorder
P22723	Gabrg2	DOID:1561	cognitive_disorder
P22723	Gabrg2	DOID:2468	psychotic_disorder
P22723	Gabrg2	DOID:3312	bipolar_disorder
P22723	Gabrg2	DOID:3324	mood_disorder
P22723	Gabrg2	DOID:5419	schizophrenia
P22933	Gabrd	DOID:12849	autistic_disorder
P22933	Gabrd	DOID:1561	cognitive_disorder
P22933	Gabrd	DOID:2468	psychotic_disorder
P22933	Gabrd	DOID:5419	schizophrenia
P23242	Gja1	DOID:12849	autistic_disorder
P23242	Gja1	DOID:1470	major_depressive_disorder
P23242	Gja1	DOID:1561	cognitive_disorder
P23242	Gja1	DOID:1595	endogenous_depression
P23242	Gja1	DOID:1596	mental_depression
P23242	Gja1	DOID:3324	mood_disorder
P23818	Gria1	DOID:1561	cognitive_disorder
P23818	Gria1	DOID:2468	psychotic_disorder
P23818	Gria1	DOID:3312	bipolar_disorder
P23818	Gria1	DOID:3324	mood_disorder
P23818	Gria1	DOID:5419	schizophrenia
P23819	Gria2	DOID:1229	paranoid_schizophrenia
P23819	Gria2	DOID:12849	autistic_disorder
P23819	Gria2	DOID:1470	major_depressive_disorder
P23819	Gria2	DOID:1561	cognitive_disorder
P23819	Gria2	DOID:1595	endogenous_depression
P23819	Gria2	DOID:1596	mental_depression
P23819	Gria2	DOID:2468	psychotic_disorder
P23819	Gria2	DOID:3324	mood_disorder
P23819	Gria2	DOID:5419	schizophrenia
P26048	Gabra2	DOID:12849	autistic_disorder
P26048	Gabra2	DOID:1470	major_depressive_disorder
P26048	Gabra2	DOID:1561	cognitive_disorder
P26048	Gabra2	DOID:1595	endogenous_depression
P26048	Gabra2	DOID:1596	mental_depression
P26048	Gabra2	DOID:2030	anxiety_disorder
P26048	Gabra2	DOID:2055	post-traumatic_stress_disorder
P26048	Gabra2	DOID:2468	psychotic_disorder
P26048	Gabra2	DOID:3312	bipolar_disorder
P26048	Gabra2	DOID:3324	mood_disorder
P26048	Gabra2	DOID:5419	schizophrenia
P26049	Gabra3	DOID:12849	autistic_disorder
P26049	Gabra3	DOID:1470	major_depressive_disorder
P26049	Gabra3	DOID:1561	cognitive_disorder
P26049	Gabra3	DOID:1595	endogenous_depression
P26049	Gabra3	DOID:1596	mental_depression
P26049	Gabra3	DOID:2468	psychotic_disorder
P26049	Gabra3	DOID:3324	mood_disorder
P26049	Gabra3	DOID:5419	schizophrenia
P28571-1	Slc6a9	DOID:1561	cognitive_disorder
P28571-1	Slc6a9	DOID:2468	psychotic_disorder
P28571-1	Slc6a9	DOID:5419	schizophrenia
P28661	Septin4	DOID:1561	cognitive_disorder
P28661	Septin4	DOID:2468	psychotic_disorder
P28661	Septin4	DOID:5419	schizophrenia
P30999	Ctnnd1	DOID:12849	autistic_disorder
P30999-2	Ctnnd1	DOID:12849	autistic_disorder
P31648	Slc6a1	DOID:1059	intellectual_disability
P31650	Slc6a11	DOID:1059	intellectual_disability
P34152	Ptk2	DOID:12849	autistic_disorder
P35436	Grin2a	DOID:1059	intellectual_disability
P35436	Grin2a	DOID:1094	attention_deficit_hyperactivity_disorder
P35436	Grin2a	DOID:12849	autistic_disorder
P35436	Grin2a	DOID:1307	dementia
P35436	Grin2a	DOID:1470	major_depressive_disorder
P35436	Grin2a	DOID:1561	cognitive_disorder
P35436	Grin2a	DOID:1595	endogenous_depression
P35436	Grin2a	DOID:1596	mental_depression
P35436	Grin2a	DOID:2468	psychotic_disorder
P35436	Grin2a	DOID:3312	bipolar_disorder
P35436	Grin2a	DOID:3324	mood_disorder
P35436	Grin2a	DOID:5419	schizophrenia
P35436	Grin2a	DOID:8725	vascular_dementia
P35438	Grin1	DOID:1059	intellectual_disability
P35438	Grin1	DOID:1307	dementia
P35438	Grin1	DOID:1561	cognitive_disorder
P35438	Grin1	DOID:2468	psychotic_disorder
P35438	Grin1	DOID:3312	bipolar_disorder
P35438	Grin1	DOID:3324	mood_disorder
P35438	Grin1	DOID:5419	schizophrenia
P35438	Grin1	DOID:8725	vascular_dementia
P35802	Gpm6a	DOID:1561	cognitive_disorder
P35802	Gpm6a	DOID:2468	psychotic_disorder
P35802	Gpm6a	DOID:3312	bipolar_disorder
P35802	Gpm6a	DOID:3324	mood_disorder
P35802	Gpm6a	DOID:5419	schizophrenia
P39087	Grik2	DOID:1059	intellectual_disability
P39087	Grik2	DOID:10933	obsessive-compulsive_disorder
P39087	Grik2	DOID:1229	paranoid_schizophrenia
P39087	Grik2	DOID:12849	autistic_disorder
P39087	Grik2	DOID:1561	cognitive_disorder
P39087	Grik2	DOID:2030	anxiety_disorder
P39087	Grik2	DOID:2468	psychotic_disorder
P39087	Grik2	DOID:3312	bipolar_disorder
P39087	Grik2	DOID:3324	mood_disorder
P39087	Grik2	DOID:5419	schizophrenia
P40237	Cd82	DOID:1561	cognitive_disorder
P40237	Cd82	DOID:2468	psychotic_disorder
P40237	Cd82	DOID:5419	schizophrenia
P43006	Slc1a2	DOID:1470	major_depressive_disorder
P43006	Slc1a2	DOID:1561	cognitive_disorder
P43006	Slc1a2	DOID:1595	endogenous_depression
P43006	Slc1a2	DOID:1596	mental_depression
P43006	Slc1a2	DOID:2468	psychotic_disorder
P43006	Slc1a2	DOID:3324	mood_disorder
P43006	Slc1a2	DOID:5419	schizophrenia
P46096	Syt1	DOID:1094	attention_deficit_hyperactivity_disorder
P46096	Syt1	DOID:9255	frontotemporal_dementia
P47708	Rph3a	DOID:12217	Lewy_body_dementia
P47708	Rph3a	DOID:1307	dementia
P47708	Rph3a	DOID:1561	cognitive_disorder
P47743	Grm8	DOID:12849	autistic_disorder
P47743	Grm8	DOID:1561	cognitive_disorder
P47743	Grm8	DOID:2468	psychotic_disorder
P47743	Grm8	DOID:3312	bipolar_disorder
P47743	Grm8	DOID:3324	mood_disorder
P47743	Grm8	DOID:5419	schizophrenia
P47746	Cnr1	DOID:1094	attention_deficit_hyperactivity_disorder
P47746	Cnr1	DOID:1229	paranoid_schizophrenia
P47746	Cnr1	DOID:1470	major_depressive_disorder
P47746	Cnr1	DOID:1561	cognitive_disorder
P47746	Cnr1	DOID:1595	endogenous_depression
P47746	Cnr1	DOID:1596	mental_depression
P47746	Cnr1	DOID:2030	anxiety_disorder
P47746	Cnr1	DOID:2055	post-traumatic_stress_disorder
P47746	Cnr1	DOID:2468	psychotic_disorder
P47746	Cnr1	DOID:3324	mood_disorder
P47746	Cnr1	DOID:5419	schizophrenia
P47746	Cnr1	DOID:6088	acute_stress_disorder
P49769	Psen1	DOID:11870	Pick's_disease
P49769	Psen1	DOID:12217	Lewy_body_dementia
P49769	Psen1	DOID:1307	dementia
P49769	Psen1	DOID:1561	cognitive_disorder
P49769	Psen1	DOID:9255	frontotemporal_dementia
P50516	Atp6v1a	DOID:1561	cognitive_disorder
P50516	Atp6v1a	DOID:2468	psychotic_disorder
P50516	Atp6v1a	DOID:5419	schizophrenia
P50571	Gabrb1	DOID:12849	autistic_disorder
P50571	Gabrb1	DOID:1470	major_depressive_disorder
P50571	Gabrb1	DOID:1561	cognitive_disorder
P50571	Gabrb1	DOID:1595	endogenous_depression
P50571	Gabrb1	DOID:1596	mental_depression
P50571	Gabrb1	DOID:2468	psychotic_disorder
P50571	Gabrb1	DOID:3312	bipolar_disorder
P50571	Gabrb1	DOID:3324	mood_disorder
P50571	Gabrb1	DOID:5419	schizophrenia
P51150	Rab7	DOID:1561	cognitive_disorder
P51830	Adcy9	DOID:1561	cognitive_disorder
P51830	Adcy9	DOID:3312	bipolar_disorder
P51830	Adcy9	DOID:3324	mood_disorder
P52795	Efnb1	DOID:1561	cognitive_disorder
P52795	Efnb1	DOID:2468	psychotic_disorder
P52795	Efnb1	DOID:5419	schizophrenia
P52800	Efnb2	DOID:1561	cognitive_disorder
P52800	Efnb2	DOID:2468	psychotic_disorder
P52800	Efnb2	DOID:3312	bipolar_disorder
P52800	Efnb2	DOID:3324	mood_disorder
P52800	Efnb2	DOID:5419	schizophrenia
P53810	Pitpna	DOID:1561	cognitive_disorder
P53810	Pitpna	DOID:2468	psychotic_disorder
P53810	Pitpna	DOID:5419	schizophrenia
P53994	Rab2a	DOID:1059	intellectual_disability
P54285	Cacnb3	DOID:1561	cognitive_disorder
P54285	Cacnb3	DOID:3312	bipolar_disorder
P54285	Cacnb3	DOID:3324	mood_disorder
P54822	Adsl	DOID:12849	autistic_disorder
P55012	Slc12a2	DOID:1561	cognitive_disorder
P55012	Slc12a2	DOID:2468	psychotic_disorder
P55012	Slc12a2	DOID:5419	schizophrenia
P55088	Aqp4	DOID:12849	autistic_disorder
P55088	Aqp4	DOID:535	sleep_disorder
P55088	Aqp4	DOID:8986	narcolepsy
P55088	Aqp4	DOID:9255	frontotemporal_dementia
P55288	Cdh11	DOID:1094	attention_deficit_hyperactivity_disorder
P55288	Cdh11	DOID:12849	autistic_disorder
P55821	Stmn2	DOID:1561	cognitive_disorder
P55821	Stmn2	DOID:3312	bipolar_disorder
P55821	Stmn2	DOID:3324	mood_disorder
P56564	Slc1a3	DOID:1094	attention_deficit_hyperactivity_disorder
P56564	Slc1a3	DOID:1307	dementia
P56564	Slc1a3	DOID:1470	major_depressive_disorder
P56564	Slc1a3	DOID:1561	cognitive_disorder
P56564	Slc1a3	DOID:1595	endogenous_depression
P56564	Slc1a3	DOID:1596	mental_depression
P56564	Slc1a3	DOID:2468	psychotic_disorder
P56564	Slc1a3	DOID:3324	mood_disorder
P56564	Slc1a3	DOID:5419	schizophrenia
P56695	Wfs1	DOID:1561	cognitive_disorder
P56695	Wfs1	DOID:3324	mood_disorder
P59764	Dock4	DOID:12849	autistic_disorder
P59764	Dock4	DOID:1561	cognitive_disorder
P59764	Dock4	DOID:2468	psychotic_disorder
P59764	Dock4	DOID:5419	schizophrenia
P60202	Plp1	DOID:1561	cognitive_disorder
P60202	Plp1	DOID:2468	psychotic_disorder
P60202	Plp1	DOID:5419	schizophrenia
P60766-1	Cdc42	DOID:1561	cognitive_disorder
P60766-1	Cdc42	DOID:2468	psychotic_disorder
P60766-1	Cdc42	DOID:5419	schizophrenia
P60879	Snap25	DOID:1059	intellectual_disability
P60879	Snap25	DOID:1094	attention_deficit_hyperactivity_disorder
P60879	Snap25	DOID:12217	Lewy_body_dementia
P60879	Snap25	DOID:12849	autistic_disorder
P60879	Snap25	DOID:1307	dementia
P60879	Snap25	DOID:1470	major_depressive_disorder
P60879	Snap25	DOID:1561	cognitive_disorder
P60879	Snap25	DOID:1595	endogenous_depression
P60879	Snap25	DOID:1596	mental_depression
P60879	Snap25	DOID:2468	psychotic_disorder
P60879	Snap25	DOID:3324	mood_disorder
P60879	Snap25	DOID:5419	schizophrenia
P60879	Snap25	DOID:9255	frontotemporal_dementia
P60879-2	Snap25	DOID:1059	intellectual_disability
P60879-2	Snap25	DOID:1094	attention_deficit_hyperactivity_disorder
P60879-2	Snap25	DOID:12217	Lewy_body_dementia
P60879-2	Snap25	DOID:12849	autistic_disorder
P60879-2	Snap25	DOID:1307	dementia
P60879-2	Snap25	DOID:1470	major_depressive_disorder
P60879-2	Snap25	DOID:1561	cognitive_disorder
P60879-2	Snap25	DOID:1595	endogenous_depression
P60879-2	Snap25	DOID:1596	mental_depression
P60879-2	Snap25	DOID:2468	psychotic_disorder
P60879-2	Snap25	DOID:3324	mood_disorder
P60879-2	Snap25	DOID:5419	schizophrenia
P60879-2	Snap25	DOID:9255	frontotemporal_dementia
P61226	Rap2b	DOID:1561	cognitive_disorder
P61226	Rap2b	DOID:2468	psychotic_disorder
P61226	Rap2b	DOID:5419	schizophrenia
P61264	Stx1b	DOID:9255	frontotemporal_dementia
P62761	Vsnl1	DOID:12217	Lewy_body_dementia
P62761	Vsnl1	DOID:1307	dementia
P62761	Vsnl1	DOID:1561	cognitive_disorder
P62761	Vsnl1	DOID:2468	psychotic_disorder
P62761	Vsnl1	DOID:5419	schizophrenia
P62812	Gabra1	DOID:12849	autistic_disorder
P62812	Gabra1	DOID:1561	cognitive_disorder
P62812	Gabra1	DOID:2468	psychotic_disorder
P62812	Gabra1	DOID:5419	schizophrenia
P62827	Ran	DOID:1561	cognitive_disorder
P62827	Ran	DOID:2030	anxiety_disorder
P62827	Ran	DOID:594	panic_disorder
P62827	Ran	DOID:9255	frontotemporal_dementia
P62983	Rps27a	DOID:1561	cognitive_disorder
P62983	Rps27a	DOID:3312	bipolar_disorder
P62983	Rps27a	DOID:3324	mood_disorder
P63001	Rac1	DOID:12849	autistic_disorder
P63011	Rab3a	DOID:1059	intellectual_disability
P63011	Rab3a	DOID:12849	autistic_disorder
P63017	Hspa8	DOID:1561	cognitive_disorder
P63017	Hspa8	DOID:2468	psychotic_disorder
P63017	Hspa8	DOID:5419	schizophrenia
P63044	Vamp2	DOID:1094	attention_deficit_hyperactivity_disorder
P63044	Vamp2	DOID:1561	cognitive_disorder
P63044	Vamp2	DOID:2468	psychotic_disorder
P63044	Vamp2	DOID:5419	schizophrenia
P63080	Gabrb3	DOID:12849	autistic_disorder
P63080	Gabrb3	DOID:1561	cognitive_disorder
P63080	Gabrb3	DOID:2030	anxiety_disorder
P63080	Gabrb3	DOID:2468	psychotic_disorder
P63080	Gabrb3	DOID:5419	schizophrenia
P63080	Gabrb3	DOID:594	panic_disorder
P63082	Atp6v0c	DOID:1059	intellectual_disability
P63137-2	Gabrb2	DOID:1561	cognitive_disorder
P63137-2	Gabrb2	DOID:2468	psychotic_disorder
P63137-2	Gabrb2	DOID:3312	bipolar_disorder
P63137-2	Gabrb2	DOID:3324	mood_disorder
P63137-2	Gabrb2	DOID:5419	schizophrenia
P63250	Kcnj3	DOID:1561	cognitive_disorder
P63250	Kcnj3	DOID:2468	psychotic_disorder
P63250	Kcnj3	DOID:5419	schizophrenia
P63328	Ppp3ca	DOID:1561	cognitive_disorder
P63328	Ppp3ca	DOID:2468	psychotic_disorder
P63328	Ppp3ca	DOID:5419	schizophrenia
P63328	Ppp3ca	DOID:9255	frontotemporal_dementia
P70211	Dcc	DOID:1561	cognitive_disorder
P70211	Dcc	DOID:2468	psychotic_disorder
P70211	Dcc	DOID:5419	schizophrenia
P70232	Chl1	DOID:1470	major_depressive_disorder
P70232	Chl1	DOID:1561	cognitive_disorder
P70232	Chl1	DOID:1595	endogenous_depression
P70232	Chl1	DOID:1596	mental_depression
P70232	Chl1	DOID:2468	psychotic_disorder
P70232	Chl1	DOID:3324	mood_disorder
P70232	Chl1	DOID:5419	schizophrenia
P70280	Vamp7	DOID:1561	cognitive_disorder
P70280	Vamp7	DOID:3312	bipolar_disorder
P70280	Vamp7	DOID:3324	mood_disorder
P70296	Pebp1	DOID:1561	cognitive_disorder
P70296	Pebp1	DOID:2468	psychotic_disorder
P70296	Pebp1	DOID:5419	schizophrenia
P70414	Slc8a1	DOID:1307	dementia
P70414	Slc8a1	DOID:1561	cognitive_disorder
P70677	Casp3	DOID:12849	autistic_disorder
P70677	Casp3	DOID:1561	cognitive_disorder
P70677	Casp3	DOID:2468	psychotic_disorder
P70677	Casp3	DOID:5419	schizophrenia
P83510	Tnik	DOID:1561	cognitive_disorder
P83510	Tnik	DOID:2468	psychotic_disorder
P83510	Tnik	DOID:5419	schizophrenia
P84075	Hpca	DOID:12217	Lewy_body_dementia
P84075	Hpca	DOID:1307	dementia
P84075	Hpca	DOID:1561	cognitive_disorder
P84084	Arf5	DOID:9255	frontotemporal_dementia
P84086	Cplx2	DOID:1094	attention_deficit_hyperactivity_disorder
P84086	Cplx2	DOID:1561	cognitive_disorder
P84086	Cplx2	DOID:2468	psychotic_disorder
P84086	Cplx2	DOID:5419	schizophrenia
P84091	Ap2m1	DOID:1470	major_depressive_disorder
P84091	Ap2m1	DOID:1561	cognitive_disorder
P84091	Ap2m1	DOID:1595	endogenous_depression
P84091	Ap2m1	DOID:1596	mental_depression
P84091	Ap2m1	DOID:2468	psychotic_disorder
P84091	Ap2m1	DOID:3324	mood_disorder
P84091	Ap2m1	DOID:5419	schizophrenia
P97300	Nptn	DOID:1561	cognitive_disorder
P97300	Nptn	DOID:2468	psychotic_disorder
P97300	Nptn	DOID:5419	schizophrenia
P97318	Dab1	DOID:12849	autistic_disorder
P97441	Slc30a3	DOID:12217	Lewy_body_dementia
P97441	Slc30a3	DOID:1307	dementia
P97441	Slc30a3	DOID:1561	cognitive_disorder
P97441	Slc30a3	DOID:2468	psychotic_disorder
P97441	Slc30a3	DOID:5419	schizophrenia
P97445	Cacna1a	DOID:1059	intellectual_disability
P97447	Fhl1	DOID:1059	intellectual_disability
P97490	Adcy8	DOID:1561	cognitive_disorder
P97490	Adcy8	DOID:2030	anxiety_disorder
P97490	Adcy8	DOID:2055	post-traumatic_stress_disorder
P97490	Adcy8	DOID:3312	bipolar_disorder
P97490	Adcy8	DOID:3324	mood_disorder
P97490	Adcy8	DOID:6088	acute_stress_disorder
P97772	Grm1	DOID:1561	cognitive_disorder
P97772	Grm1	DOID:2468	psychotic_disorder
P97772	Grm1	DOID:3312	bipolar_disorder
P97772	Grm1	DOID:3324	mood_disorder
P97772	Grm1	DOID:5419	schizophrenia
P97797-2	Sirpa	DOID:1561	cognitive_disorder
P97797-2	Sirpa	DOID:2468	psychotic_disorder
P97797-2	Sirpa	DOID:5419	schizophrenia
P98200	Atp8a2	DOID:1059	intellectual_disability
P98200	Atp8a2	DOID:1561	cognitive_disorder
P98200	Atp8a2	DOID:2468	psychotic_disorder
P98200	Atp8a2	DOID:3312	bipolar_disorder
P98200	Atp8a2	DOID:3324	mood_disorder
P98200	Atp8a2	DOID:5419	schizophrenia
P98203	Arvcf	DOID:1561	cognitive_disorder
P98203	Arvcf	DOID:2468	psychotic_disorder
P98203	Arvcf	DOID:5419	schizophrenia
Q01097	Grin2b	DOID:1059	intellectual_disability
Q01097	Grin2b	DOID:1094	attention_deficit_hyperactivity_disorder
Q01097	Grin2b	DOID:1229	paranoid_schizophrenia
Q01097	Grin2b	DOID:12849	autistic_disorder
Q01097	Grin2b	DOID:1307	dementia
Q01097	Grin2b	DOID:1470	major_depressive_disorder
Q01097	Grin2b	DOID:1561	cognitive_disorder
Q01097	Grin2b	DOID:1595	endogenous_depression
Q01097	Grin2b	DOID:1596	mental_depression
Q01097	Grin2b	DOID:2468	psychotic_disorder
Q01097	Grin2b	DOID:3312	bipolar_disorder
Q01097	Grin2b	DOID:3324	mood_disorder
Q01097	Grin2b	DOID:5419	schizophrenia
Q01097	Grin2b	DOID:8725	vascular_dementia
Q01815	Cacna1c	DOID:1094	attention_deficit_hyperactivity_disorder
Q01815	Cacna1c	DOID:12849	autistic_disorder
Q01815	Cacna1c	DOID:1470	major_depressive_disorder
Q01815	Cacna1c	DOID:1561	cognitive_disorder
Q01815	Cacna1c	DOID:1595	endogenous_depression
Q01815	Cacna1c	DOID:1596	mental_depression
Q01815	Cacna1c	DOID:2468	psychotic_disorder
Q01815	Cacna1c	DOID:3312	bipolar_disorder
Q01815	Cacna1c	DOID:3324	mood_disorder
Q01815	Cacna1c	DOID:535	sleep_disorder
Q01815	Cacna1c	DOID:5419	schizophrenia
Q01815	Cacna1c	DOID:8986	narcolepsy
Q02248	Ctnnb1	DOID:1059	intellectual_disability
Q02248	Ctnnb1	DOID:12849	autistic_disorder
Q02248	Ctnnb1	DOID:1561	cognitive_disorder
Q02248	Ctnnb1	DOID:2468	psychotic_disorder
Q02248	Ctnnb1	DOID:3312	bipolar_disorder
Q02248	Ctnnb1	DOID:3324	mood_disorder
Q02248	Ctnnb1	DOID:5419	schizophrenia
Q02248	Ctnnb1	DOID:9255	frontotemporal_dementia
Q04690-2	Nf1	DOID:1094	attention_deficit_hyperactivity_disorder
Q05512	Mark2	DOID:1094	attention_deficit_hyperactivity_disorder
Q07813	Bax	DOID:1307	dementia
Q07813	Bax	DOID:1561	cognitive_disorder
Q07813	Bax	DOID:535	sleep_disorder
Q14BI2	Grm2	DOID:1470	major_depressive_disorder
Q14BI2	Grm2	DOID:1561	cognitive_disorder
Q14BI2	Grm2	DOID:1595	endogenous_depression
Q14BI2	Grm2	DOID:1596	mental_depression
Q14BI2	Grm2	DOID:2468	psychotic_disorder
Q14BI2	Grm2	DOID:3312	bipolar_disorder
Q14BI2	Grm2	DOID:3324	mood_disorder
Q14BI2	Grm2	DOID:5419	schizophrenia
Q2NL51	Gsk3a	DOID:1561	cognitive_disorder
Q2NL51	Gsk3a	DOID:3324	mood_disorder
Q3TWN3	Cnnm2	DOID:1059	intellectual_disability
Q3TWN3	Cnnm2	DOID:1094	attention_deficit_hyperactivity_disorder
Q3TWN3	Cnnm2	DOID:12849	autistic_disorder
Q3TWN3	Cnnm2	DOID:1470	major_depressive_disorder
Q3TWN3	Cnnm2	DOID:1561	cognitive_disorder
Q3TWN3	Cnnm2	DOID:1595	endogenous_depression
Q3TWN3	Cnnm2	DOID:1596	mental_depression
Q3TWN3	Cnnm2	DOID:2468	psychotic_disorder
Q3TWN3	Cnnm2	DOID:3312	bipolar_disorder
Q3TWN3	Cnnm2	DOID:3324	mood_disorder
Q3TWN3	Cnnm2	DOID:5419	schizophrenia
Q3TXX4	Slc17a7	DOID:1307	dementia
Q3TXX4	Slc17a7	DOID:1470	major_depressive_disorder
Q3TXX4	Slc17a7	DOID:1561	cognitive_disorder
Q3TXX4	Slc17a7	DOID:1595	endogenous_depression
Q3TXX4	Slc17a7	DOID:1596	mental_depression
Q3TXX4	Slc17a7	DOID:2468	psychotic_disorder
Q3TXX4	Slc17a7	DOID:3312	bipolar_disorder
Q3TXX4	Slc17a7	DOID:3324	mood_disorder
Q3TXX4	Slc17a7	DOID:5419	schizophrenia
Q3U1F9	Pag1	DOID:1561	cognitive_disorder
Q3U1F9	Pag1	DOID:2468	psychotic_disorder
Q3U1F9	Pag1	DOID:5419	schizophrenia
Q3U1Y4	Dennd4b	DOID:1059	intellectual_disability
Q3UHD1	Adgrb1	DOID:1561	cognitive_disorder
Q3UHD1	Adgrb1	DOID:2468	psychotic_disorder
Q3UHD1	Adgrb1	DOID:3312	bipolar_disorder
Q3UHD1	Adgrb1	DOID:3324	mood_disorder
Q3UHD1	Adgrb1	DOID:5419	schizophrenia
Q3UUG6	Tbc1d24	DOID:1059	intellectual_disability
Q4KMM3	Oxr1	DOID:1094	attention_deficit_hyperactivity_disorder
Q4KMM3	Oxr1	DOID:12849	autistic_disorder
Q4KMM3	Oxr1	DOID:1470	major_depressive_disorder
Q4KMM3	Oxr1	DOID:1561	cognitive_disorder
Q4KMM3	Oxr1	DOID:1595	endogenous_depression
Q4KMM3	Oxr1	DOID:1596	mental_depression
Q4KMM3	Oxr1	DOID:2468	psychotic_disorder
Q4KMM3	Oxr1	DOID:3312	bipolar_disorder
Q4KMM3	Oxr1	DOID:3324	mood_disorder
Q4KMM3	Oxr1	DOID:5419	schizophrenia
Q4QQM4	Trp53i11	DOID:1561	cognitive_disorder
Q4QQM4	Trp53i11	DOID:2468	psychotic_disorder
Q4QQM4	Trp53i11	DOID:5419	schizophrenia
Q5DTL9	Slc4a10	DOID:1561	cognitive_disorder
Q5DTL9	Slc4a10	DOID:2468	psychotic_disorder
Q5DTL9	Slc4a10	DOID:5419	schizophrenia
Q5FWH7	Slc39a12	DOID:1094	attention_deficit_hyperactivity_disorder
Q5FWH7	Slc39a12	DOID:12849	autistic_disorder
Q5FWH7	Slc39a12	DOID:1470	major_depressive_disorder
Q5FWH7	Slc39a12	DOID:1561	cognitive_disorder
Q5FWH7	Slc39a12	DOID:1595	endogenous_depression
Q5FWH7	Slc39a12	DOID:1596	mental_depression
Q5FWH7	Slc39a12	DOID:2468	psychotic_disorder
Q5FWH7	Slc39a12	DOID:3312	bipolar_disorder
Q5FWH7	Slc39a12	DOID:3324	mood_disorder
Q5FWH7	Slc39a12	DOID:5419	schizophrenia
Q5GH67	Xkr4	DOID:1094	attention_deficit_hyperactivity_disorder
Q5PR73	Diras2	DOID:1094	attention_deficit_hyperactivity_disorder
Q5PR73	Diras2	DOID:1307	dementia
Q5PR73	Diras2	DOID:1561	cognitive_disorder
Q5PR73	Diras2	DOID:8725	vascular_dementia
Q5SQX6	Cyfip2	DOID:1561	cognitive_disorder
Q5SQX6	Cyfip2	DOID:3312	bipolar_disorder
Q5SQX6	Cyfip2	DOID:3324	mood_disorder
Q5SRX1	Tom1l2	DOID:1307	dementia
Q5SRX1	Tom1l2	DOID:1561	cognitive_disorder
Q60629	Epha5	DOID:1094	attention_deficit_hyperactivity_disorder
Q60771	Cldn11	DOID:1561	cognitive_disorder
Q60771	Cldn11	DOID:2468	psychotic_disorder
Q60771	Cldn11	DOID:3312	bipolar_disorder
Q60771	Cldn11	DOID:3324	mood_disorder
Q60771	Cldn11	DOID:5419	schizophrenia
Q60996	Ppp2r5c	DOID:1059	intellectual_disability
Q60996	Ppp2r5c	DOID:12849	autistic_disorder
Q61249	Igbp1	DOID:1059	intellectual_disability
Q61301	Ctnna2	DOID:1561	cognitive_disorder
Q61301	Ctnna2	DOID:3312	bipolar_disorder
Q61301	Ctnna2	DOID:3324	mood_disorder
Q61327	Slc6a3	DOID:1059	intellectual_disability
Q61327	Slc6a3	DOID:10933	obsessive-compulsive_disorder
Q61327	Slc6a3	DOID:1094	attention_deficit_hyperactivity_disorder
Q61327	Slc6a3	DOID:12139	dysthymic_disorder
Q61327	Slc6a3	DOID:12217	Lewy_body_dementia
Q61327	Slc6a3	DOID:12849	autistic_disorder
Q61327	Slc6a3	DOID:1307	dementia
Q61327	Slc6a3	DOID:14320	generalized_anxiety_disorder
Q61327	Slc6a3	DOID:1470	major_depressive_disorder
Q61327	Slc6a3	DOID:1561	cognitive_disorder
Q61327	Slc6a3	DOID:1595	endogenous_depression
Q61327	Slc6a3	DOID:1596	mental_depression
Q61327	Slc6a3	DOID:2030	anxiety_disorder
Q61327	Slc6a3	DOID:2055	post-traumatic_stress_disorder
Q61327	Slc6a3	DOID:2468	psychotic_disorder
Q61327	Slc6a3	DOID:3312	bipolar_disorder
Q61327	Slc6a3	DOID:3324	mood_disorder
Q61327	Slc6a3	DOID:535	sleep_disorder
Q61327	Slc6a3	DOID:5419	schizophrenia
Q61327	Slc6a3	DOID:6088	acute_stress_disorder
Q61327	Slc6a3	DOID:9091	REM_sleep_behavior_disorder
Q61548	Snap91	DOID:1561	cognitive_disorder
Q61548	Snap91	DOID:3312	bipolar_disorder
Q61548	Snap91	DOID:3324	mood_disorder
Q61792	Lasp1	DOID:1561	cognitive_disorder
Q61792	Lasp1	DOID:2468	psychotic_disorder
Q61792	Lasp1	DOID:3312	bipolar_disorder
Q61792	Lasp1	DOID:3324	mood_disorder
Q61792	Lasp1	DOID:5419	schizophrenia
Q61885	Mog	DOID:12849	autistic_disorder
Q61885	Mog	DOID:14042	bipolar_I_disorder
Q61885	Mog	DOID:1561	cognitive_disorder
Q61885	Mog	DOID:2468	psychotic_disorder
Q61885	Mog	DOID:3312	bipolar_disorder
Q61885	Mog	DOID:3324	mood_disorder
Q61885	Mog	DOID:535	sleep_disorder
Q61885	Mog	DOID:5419	schizophrenia
Q61885	Mog	DOID:8986	narcolepsy
Q62048	Pea15a	DOID:1561	cognitive_disorder
Q62048	Pea15a	DOID:2468	psychotic_disorder
Q62048	Pea15a	DOID:5419	schizophrenia
Q62108	Dlg4	DOID:12217	Lewy_body_dementia
Q62108	Dlg4	DOID:1307	dementia
Q62108	Dlg4	DOID:1561	cognitive_disorder
Q62108	Dlg4	DOID:2468	psychotic_disorder
Q62108	Dlg4	DOID:5419	schizophrenia
Q62277	Syp	DOID:1059	intellectual_disability
Q62277	Syp	DOID:1094	attention_deficit_hyperactivity_disorder
Q62277	Syp	DOID:12217	Lewy_body_dementia
Q62277	Syp	DOID:1307	dementia
Q62277	Syp	DOID:1561	cognitive_disorder
Q62277	Syp	DOID:9255	frontotemporal_dementia
Q62283	Tspan7	DOID:1059	intellectual_disability
Q62348	Tsn	DOID:1094	attention_deficit_hyperactivity_disorder
Q62348	Tsn	DOID:1561	cognitive_disorder
Q62348	Tsn	DOID:2468	psychotic_disorder
Q62348	Tsn	DOID:5419	schizophrenia
Q62407	Speg	DOID:1059	intellectual_disability
Q62419	Sh3gl1	DOID:9255	frontotemporal_dementia
Q62420	Sh3gl2	DOID:12217	Lewy_body_dementia
Q62420	Sh3gl2	DOID:1307	dementia
Q62420	Sh3gl2	DOID:1561	cognitive_disorder
Q62420	Sh3gl2	DOID:2468	psychotic_disorder
Q62420	Sh3gl2	DOID:5419	schizophrenia
Q62421	Sh3gl3	DOID:1561	cognitive_disorder
Q62421	Sh3gl3	DOID:2468	psychotic_disorder
Q62421	Sh3gl3	DOID:5419	schizophrenia
Q640R3	Hepacam	DOID:1059	intellectual_disability
Q640R3	Hepacam	DOID:12849	autistic_disorder
Q64332-2	Syn2	DOID:12849	autistic_disorder
Q64332-2	Syn2	DOID:1561	cognitive_disorder
Q64332-2	Syn2	DOID:2468	psychotic_disorder
Q64332-2	Syn2	DOID:3312	bipolar_disorder
Q64332-2	Syn2	DOID:3324	mood_disorder
Q64332-2	Syn2	DOID:5419	schizophrenia
Q66L42	Map3k10	DOID:12217	Lewy_body_dementia
Q66L42	Map3k10	DOID:1307	dementia
Q66L42	Map3k10	DOID:1561	cognitive_disorder
Q68FH0	Pkp4	DOID:1561	cognitive_disorder
Q68FH0	Pkp4	DOID:2468	psychotic_disorder
Q68FH0	Pkp4	DOID:5419	schizophrenia
Q69ZK9	Nlgn2	DOID:1561	cognitive_disorder
Q69ZK9	Nlgn2	DOID:2468	psychotic_disorder
Q69ZK9	Nlgn2	DOID:5419	schizophrenia
Q6DFV3	Arhgap21	DOID:1561	cognitive_disorder
Q6DFV3	Arhgap21	DOID:2030	anxiety_disorder
Q6DFV3	Arhgap21	DOID:2055	post-traumatic_stress_disorder
Q6DFV3	Arhgap21	DOID:6088	acute_stress_disorder
Q6NVF0	Ocrl	DOID:1059	intellectual_disability
Q6NVF0	Ocrl	DOID:12849	autistic_disorder
Q6NXK7	Dpp10	DOID:1094	attention_deficit_hyperactivity_disorder
Q6NXK7	Dpp10	DOID:1561	cognitive_disorder
Q6NXK7	Dpp10	DOID:3312	bipolar_disorder
Q6NXK7	Dpp10	DOID:3324	mood_disorder
Q6PAM0	Prkab2	DOID:1561	cognitive_disorder
Q6PAM0	Prkab2	DOID:2468	psychotic_disorder
Q6PAM0	Prkab2	DOID:5418	schizoaffective_disorder
Q6PAM0	Prkab2	DOID:5419	schizophrenia
Q6PIC6	Atp1a3	DOID:1561	cognitive_disorder
Q6PIC6	Atp1a3	DOID:3312	bipolar_disorder
Q6PIC6	Atp1a3	DOID:3324	mood_disorder
Q6Q477	Atp2b4	DOID:1561	cognitive_disorder
Q6Q477	Atp2b4	DOID:2468	psychotic_disorder
Q6Q477	Atp2b4	DOID:5419	schizophrenia
Q6RHR9	Magi1	DOID:1561	cognitive_disorder
Q6RHR9	Magi1	DOID:2468	psychotic_disorder
Q6RHR9	Magi1	DOID:3312	bipolar_disorder
Q6RHR9	Magi1	DOID:3324	mood_disorder
Q6RHR9	Magi1	DOID:5419	schizophrenia
Q6V4S5	Sdk2	DOID:1561	cognitive_disorder
Q6V4S5	Sdk2	DOID:2030	anxiety_disorder
Q6V4S5	Sdk2	DOID:594	panic_disorder
Q6VNS1	Ntrk3	DOID:10933	obsessive-compulsive_disorder
Q6VNS1	Ntrk3	DOID:1094	attention_deficit_hyperactivity_disorder
Q6VNS1	Ntrk3	DOID:1229	paranoid_schizophrenia
Q6VNS1	Ntrk3	DOID:12849	autistic_disorder
Q6VNS1	Ntrk3	DOID:1470	major_depressive_disorder
Q6VNS1	Ntrk3	DOID:1561	cognitive_disorder
Q6VNS1	Ntrk3	DOID:1595	endogenous_depression
Q6VNS1	Ntrk3	DOID:1596	mental_depression
Q6VNS1	Ntrk3	DOID:2030	anxiety_disorder
Q6VNS1	Ntrk3	DOID:2468	psychotic_disorder
Q6VNS1	Ntrk3	DOID:3312	bipolar_disorder
Q6VNS1	Ntrk3	DOID:3324	mood_disorder
Q6VNS1	Ntrk3	DOID:5419	schizophrenia
Q6ZQ38	Cand1	DOID:9255	frontotemporal_dementia
Q71M36	Cspg5	DOID:1561	cognitive_disorder
Q71M36	Cspg5	DOID:2468	psychotic_disorder
Q71M36	Cspg5	DOID:5419	schizophrenia
Q76HP3	Tmem132d	DOID:1561	cognitive_disorder
Q76HP3	Tmem132d	DOID:2030	anxiety_disorder
Q76HP3	Tmem132d	DOID:594	panic_disorder
Q7M6Y3-5	Picalm	DOID:1307	dementia
Q7M6Y3-5	Picalm	DOID:1561	cognitive_disorder
Q7TMY8	Huwe1	DOID:1059	intellectual_disability
Q7TMY8	Huwe1	DOID:1561	cognitive_disorder
Q7TMY8	Huwe1	DOID:2468	psychotic_disorder
Q7TMY8	Huwe1	DOID:3312	bipolar_disorder
Q7TMY8	Huwe1	DOID:3324	mood_disorder
Q7TMY8	Huwe1	DOID:5419	schizophrenia
Q7TPD3	Robo2	DOID:1561	cognitive_disorder
Q7TPD3	Robo2	DOID:2468	psychotic_disorder
Q7TPD3	Robo2	DOID:5419	schizophrenia
Q7TQF7	Amph	DOID:9255	frontotemporal_dementia
Q80T41	Gabbr2	DOID:12849	autistic_disorder
Q80T41	Gabbr2	DOID:1561	cognitive_disorder
Q80T41	Gabbr2	DOID:2030	anxiety_disorder
Q80T41	Gabbr2	DOID:2055	post-traumatic_stress_disorder
Q80T41	Gabbr2	DOID:2468	psychotic_disorder
Q80T41	Gabbr2	DOID:3324	mood_disorder
Q80T41	Gabbr2	DOID:5419	schizophrenia
Q80T41	Gabbr2	DOID:6088	acute_stress_disorder
Q80TE7	Lrrc7	DOID:1094	attention_deficit_hyperactivity_disorder
Q80TF3	Pcdh19	DOID:1059	intellectual_disability
Q80TF3	Pcdh19	DOID:12849	autistic_disorder
Q80TL1	Adcy2	DOID:1561	cognitive_disorder
Q80TL1	Adcy2	DOID:3312	bipolar_disorder
Q80TL1	Adcy2	DOID:3324	mood_disorder
Q80TZ3	Dnajc6	DOID:1059	intellectual_disability
Q80TZ3	Dnajc6	DOID:1561	cognitive_disorder
Q80TZ3	Dnajc6	DOID:2468	psychotic_disorder
Q80TZ3	Dnajc6	DOID:5419	schizophrenia
Q80VQ0	Aldh3b1	DOID:1561	cognitive_disorder
Q80VQ0	Aldh3b1	DOID:2468	psychotic_disorder
Q80VQ0	Aldh3b1	DOID:5419	schizophrenia
Q80XP9	Wnk3	DOID:1059	intellectual_disability
Q80XP9	Wnk3	DOID:12849	autistic_disorder
Q80XP9	Wnk3	DOID:1561	cognitive_disorder
Q80XP9	Wnk3	DOID:2468	psychotic_disorder
Q80XP9	Wnk3	DOID:5419	schizophrenia
Q80YA9	Cnksr2	DOID:1059	intellectual_disability
Q80YA9	Cnksr2	DOID:1561	cognitive_disorder
Q80YA9	Cnksr2	DOID:2468	psychotic_disorder
Q80YA9	Cnksr2	DOID:5419	schizophrenia
Q80YA9-2	Cnksr2	DOID:1059	intellectual_disability
Q80YA9-2	Cnksr2	DOID:1561	cognitive_disorder
Q80YA9-2	Cnksr2	DOID:2468	psychotic_disorder
Q80YA9-2	Cnksr2	DOID:5419	schizophrenia
Q811D0	Dlg1	DOID:1561	cognitive_disorder
Q811D0	Dlg1	DOID:2468	psychotic_disorder
Q811D0	Dlg1	DOID:5419	schizophrenia
Q811P8	Arhgap32	DOID:1561	cognitive_disorder
Q811P8	Arhgap32	DOID:2468	psychotic_disorder
Q811P8	Arhgap32	DOID:5419	schizophrenia
Q8BG67	Efr3a	DOID:1561	cognitive_disorder
Q8BG67	Efr3a	DOID:2030	anxiety_disorder
Q8BG67	Efr3a	DOID:2055	post-traumatic_stress_disorder
Q8BG67	Efr3a	DOID:6088	acute_stress_disorder
Q8BHC1	Rab39b	DOID:1059	intellectual_disability
Q8BHE3	Atcay	DOID:1561	cognitive_disorder
Q8BHE3	Atcay	DOID:2468	psychotic_disorder
Q8BHE3	Atcay	DOID:5419	schizophrenia
Q8BHK2	Scn3b	DOID:1561	cognitive_disorder
Q8BHK2	Scn3b	DOID:2468	psychotic_disorder
Q8BHK2	Scn3b	DOID:5419	schizophrenia
Q8BIK4	Dock9	DOID:1561	cognitive_disorder
Q8BIK4	Dock9	DOID:3312	bipolar_disorder
Q8BIK4	Dock9	DOID:3324	mood_disorder
Q8BJF9	Chmp2b	DOID:10933	obsessive-compulsive_disorder
Q8BJF9	Chmp2b	DOID:12217	Lewy_body_dementia
Q8BJF9	Chmp2b	DOID:1307	dementia
Q8BJF9	Chmp2b	DOID:1561	cognitive_disorder
Q8BJF9	Chmp2b	DOID:2030	anxiety_disorder
Q8BJF9	Chmp2b	DOID:9255	frontotemporal_dementia
Q8BJI1	Slc6a17	DOID:1059	intellectual_disability
Q8BKC5	Ipo5	DOID:1561	cognitive_disorder
Q8BKC5	Ipo5	DOID:2468	psychotic_disorder
Q8BKC5	Ipo5	DOID:5419	schizophrenia
Q8BKX1-2	Baiap2	DOID:1094	attention_deficit_hyperactivity_disorder
Q8BKX1-2	Baiap2	DOID:12849	autistic_disorder
Q8BLE7	Slc17a6	DOID:1094	attention_deficit_hyperactivity_disorder
Q8BLE7	Slc17a6	DOID:12849	autistic_disorder
Q8BLE7	Slc17a6	DOID:1307	dementia
Q8BLE7	Slc17a6	DOID:1470	major_depressive_disorder
Q8BLE7	Slc17a6	DOID:1561	cognitive_disorder
Q8BLE7	Slc17a6	DOID:1595	endogenous_depression
Q8BLE7	Slc17a6	DOID:1596	mental_depression
Q8BLE7	Slc17a6	DOID:2468	psychotic_disorder
Q8BLE7	Slc17a6	DOID:3312	bipolar_disorder
Q8BLE7	Slc17a6	DOID:3324	mood_disorder
Q8BLE7	Slc17a6	DOID:5419	schizophrenia
Q8BLU0	Flrt2	DOID:535	sleep_disorder
Q8BNY6	Ncs1	DOID:1561	cognitive_disorder
Q8BNY6	Ncs1	DOID:2468	psychotic_disorder
Q8BNY6	Ncs1	DOID:3312	bipolar_disorder
Q8BNY6	Ncs1	DOID:3324	mood_disorder
Q8BNY6	Ncs1	DOID:5419	schizophrenia
Q8BPE4	Tmem177	DOID:1094	attention_deficit_hyperactivity_disorder
Q8BR86	Kirrel3	DOID:1059	intellectual_disability
Q8BR86	Kirrel3	DOID:1094	attention_deficit_hyperactivity_disorder
Q8BRK8	Prkaa2	DOID:1561	cognitive_disorder
Q8BRK8	Prkaa2	DOID:2468	psychotic_disorder
Q8BRK8	Prkaa2	DOID:5418	schizoaffective_disorder
Q8BRK8	Prkaa2	DOID:5419	schizophrenia
Q8BRT1	Clasp2	DOID:1059	intellectual_disability
Q8BRU6	Slc18a2	DOID:12217	Lewy_body_dementia
Q8BRU6	Slc18a2	DOID:1307	dementia
Q8BRU6	Slc18a2	DOID:1470	major_depressive_disorder
Q8BRU6	Slc18a2	DOID:1561	cognitive_disorder
Q8BRU6	Slc18a2	DOID:1595	endogenous_depression
Q8BRU6	Slc18a2	DOID:1596	mental_depression
Q8BRU6	Slc18a2	DOID:2468	psychotic_disorder
Q8BRU6	Slc18a2	DOID:3312	bipolar_disorder
Q8BRU6	Slc18a2	DOID:3324	mood_disorder
Q8BRU6	Slc18a2	DOID:5419	schizophrenia
Q8BSS9	Ppfia2	DOID:1561	cognitive_disorder
Q8BSS9	Ppfia2	DOID:2468	psychotic_disorder
Q8BSS9	Ppfia2	DOID:5419	schizophrenia
Q8BVE3	Atp6v1h	DOID:1561	cognitive_disorder
Q8BVE3	Atp6v1h	DOID:3312	bipolar_disorder
Q8BVE3	Atp6v1h	DOID:3324	mood_disorder
Q8BVE3	Atp6v1h	DOID:9255	frontotemporal_dementia
Q8BXR1	Slc7a14	DOID:1561	cognitive_disorder
Q8BXR1	Slc7a14	DOID:2468	psychotic_disorder
Q8BXR1	Slc7a14	DOID:3312	bipolar_disorder
Q8BXR1	Slc7a14	DOID:3324	mood_disorder
Q8BXR1	Slc7a14	DOID:5419	schizophrenia
Q8BYR5-2	Cadps2	DOID:1059	intellectual_disability
Q8BYR5-2	Cadps2	DOID:12849	autistic_disorder
Q8BZA9	Tigar	DOID:1470	major_depressive_disorder
Q8BZA9	Tigar	DOID:1561	cognitive_disorder
Q8BZA9	Tigar	DOID:1595	endogenous_depression
Q8BZA9	Tigar	DOID:1596	mental_depression
Q8BZA9	Tigar	DOID:3324	mood_disorder
Q8C0T5	Sipa1l1	DOID:1561	cognitive_disorder
Q8C0T5	Sipa1l1	DOID:2468	psychotic_disorder
Q8C0T5	Sipa1l1	DOID:5419	schizophrenia
Q8C4X2	Csnk1g3	DOID:1470	major_depressive_disorder
Q8C4X2	Csnk1g3	DOID:1561	cognitive_disorder
Q8C4X2	Csnk1g3	DOID:1595	endogenous_depression
Q8C4X2	Csnk1g3	DOID:1596	mental_depression
Q8C4X2	Csnk1g3	DOID:3324	mood_disorder
Q8C7M3-2	Trim9	DOID:12217	Lewy_body_dementia
Q8C7M3-2	Trim9	DOID:1307	dementia
Q8C7M3-2	Trim9	DOID:1561	cognitive_disorder
Q8C8R3-2	Ank2	DOID:1561	cognitive_disorder
Q8C8R3-2	Ank2	DOID:2468	psychotic_disorder
Q8C8R3-2	Ank2	DOID:5419	schizophrenia
Q8C8R3-4	Ank2	DOID:1561	cognitive_disorder
Q8C8R3-4	Ank2	DOID:2468	psychotic_disorder
Q8C8R3-4	Ank2	DOID:5419	schizophrenia
Q8CBX0	Tmem63c	DOID:1561	cognitive_disorder
Q8CBX0	Tmem63c	DOID:3312	bipolar_disorder
Q8CBX0	Tmem63c	DOID:3324	mood_disorder
Q8CC35	Synpo	DOID:1059	intellectual_disability
Q8CC35	Synpo	DOID:1561	cognitive_disorder
Q8CC35	Synpo	DOID:2468	psychotic_disorder
Q8CC35	Synpo	DOID:5419	schizophrenia
Q8K093	Trhde	DOID:1094	attention_deficit_hyperactivity_disorder
Q8K093	Trhde	DOID:1561	cognitive_disorder
Q8K093	Trhde	DOID:1595	endogenous_depression
Q8K093	Trhde	DOID:1596	mental_depression
Q8K093	Trhde	DOID:3312	bipolar_disorder
Q8K093	Trhde	DOID:3324	mood_disorder
Q8K0U4	Hspa12a	DOID:1561	cognitive_disorder
Q8K0U4	Hspa12a	DOID:2468	psychotic_disorder
Q8K0U4	Hspa12a	DOID:5419	schizophrenia
Q8K212	Pacs1	DOID:1059	intellectual_disability
Q8K394	Plcl2	DOID:1561	cognitive_disorder
Q8K394	Plcl2	DOID:2468	psychotic_disorder
Q8K394	Plcl2	DOID:5419	schizophrenia
Q8K3F6	Kcnq3	DOID:1059	intellectual_disability
Q8K596	Slc8a2	DOID:1059	intellectual_disability
Q8R1T1	Chmp7	DOID:1094	attention_deficit_hyperactivity_disorder
Q8R366	Igsf8	DOID:9255	frontotemporal_dementia
Q8R5M8-4	Cadm1	DOID:12849	autistic_disorder
Q8R5M8-4	Cadm1	DOID:1561	cognitive_disorder
Q8R5M8-4	Cadm1	DOID:2468	psychotic_disorder
Q8R5M8-4	Cadm1	DOID:3312	bipolar_disorder
Q8R5M8-4	Cadm1	DOID:3324	mood_disorder
Q8R5M8-4	Cadm1	DOID:5419	schizophrenia
Q8VDN2	Atp1a1	DOID:12849	autistic_disorder
Q8VHH7	Adcy3	DOID:1470	major_depressive_disorder
Q8VHH7	Adcy3	DOID:1561	cognitive_disorder
Q8VHH7	Adcy3	DOID:1595	endogenous_depression
Q8VHH7	Adcy3	DOID:1596	mental_depression
Q8VHH7	Adcy3	DOID:3324	mood_disorder
Q8VHK5	Mlc1	DOID:1561	cognitive_disorder
Q8VHK5	Mlc1	DOID:2468	psychotic_disorder
Q8VHK5	Mlc1	DOID:5419	schizophrenia
Q91V14	Slc12a5	DOID:1561	cognitive_disorder
Q91V14	Slc12a5	DOID:2468	psychotic_disorder
Q91V14	Slc12a5	DOID:5419	schizophrenia
Q91WG5	Prkag2	DOID:1561	cognitive_disorder
Q91WG5	Prkag2	DOID:3312	bipolar_disorder
Q91WG5	Prkag2	DOID:3324	mood_disorder
Q91WL8	Wwox	DOID:1059	intellectual_disability
Q91WL8	Wwox	DOID:1561	cognitive_disorder
Q91WL8	Wwox	DOID:2468	psychotic_disorder
Q91WL8	Wwox	DOID:3312	bipolar_disorder
Q91WL8	Wwox	DOID:3324	mood_disorder
Q91WL8	Wwox	DOID:5419	schizophrenia
Q91XD6	Vps36	DOID:12217	Lewy_body_dementia
Q91XD6	Vps36	DOID:1307	dementia
Q91XD6	Vps36	DOID:1561	cognitive_disorder
Q91XL9	Osbpl1a	DOID:1307	dementia
Q91XL9	Osbpl1a	DOID:1561	cognitive_disorder
Q91XV3	Basp1	DOID:1470	major_depressive_disorder
Q91XV3	Basp1	DOID:1561	cognitive_disorder
Q91XV3	Basp1	DOID:1595	endogenous_depression
Q91XV3	Basp1	DOID:1596	mental_depression
Q91XV3	Basp1	DOID:2468	psychotic_disorder
Q91XV3	Basp1	DOID:3312	bipolar_disorder
Q91XV3	Basp1	DOID:3324	mood_disorder
Q91XV3	Basp1	DOID:5419	schizophrenia
Q91ZZ3	Sncb	DOID:12217	Lewy_body_dementia
Q91ZZ3	Sncb	DOID:1307	dementia
Q91ZZ3	Sncb	DOID:1561	cognitive_disorder
Q921M7	Cyrib	DOID:1561	cognitive_disorder
Q921M7	Cyrib	DOID:2030	anxiety_disorder
Q921M7	Cyrib	DOID:2055	post-traumatic_stress_disorder
Q921M7	Cyrib	DOID:6088	acute_stress_disorder
Q922J6	Tspan2	DOID:1561	cognitive_disorder
Q922J6	Tspan2	DOID:2468	psychotic_disorder
Q922J6	Tspan2	DOID:3312	bipolar_disorder
Q922J6	Tspan2	DOID:3324	mood_disorder
Q922J6	Tspan2	DOID:5419	schizophrenia
Q923Z0	Gprc5b	DOID:1094	attention_deficit_hyperactivity_disorder
Q924S7	Spred2	DOID:1561	cognitive_disorder
Q924S7	Spred2	DOID:3312	bipolar_disorder
Q924S7	Spred2	DOID:3324	mood_disorder
Q924S8	Spred1	DOID:1561	cognitive_disorder
Q924S8	Spred1	DOID:3312	bipolar_disorder
Q924S8	Spred1	DOID:3324	mood_disorder
Q99J31	Ophn1	DOID:1059	intellectual_disability
Q99KN9	Clint1	DOID:1561	cognitive_disorder
Q99KN9	Clint1	DOID:2468	psychotic_disorder
Q99KN9	Clint1	DOID:5419	schizophrenia
Q99N28	Cadm3	DOID:1561	cognitive_disorder
Q99N28	Cadm3	DOID:2468	psychotic_disorder
Q99N28	Cadm3	DOID:5419	schizophrenia
Q99N28	Cadm3	DOID:9255	frontotemporal_dementia
Q99NE5	Rims1	DOID:1561	cognitive_disorder
Q99NE5	Rims1	DOID:2468	psychotic_disorder
Q99NE5	Rims1	DOID:5419	schizophrenia
Q99PT1	Arhgdia	DOID:1561	cognitive_disorder
Q99PT1	Arhgdia	DOID:2468	psychotic_disorder
Q99PT1	Arhgdia	DOID:5419	schizophrenia
Q9CPW0	Cntnap2	DOID:1059	intellectual_disability
Q9CPW0	Cntnap2	DOID:10933	obsessive-compulsive_disorder
Q9CPW0	Cntnap2	DOID:1094	attention_deficit_hyperactivity_disorder
Q9CPW0	Cntnap2	DOID:12849	autistic_disorder
Q9CPW0	Cntnap2	DOID:1561	cognitive_disorder
Q9CPW0	Cntnap2	DOID:2030	anxiety_disorder
Q9CPW0	Cntnap2	DOID:2468	psychotic_disorder
Q9CPW0	Cntnap2	DOID:3312	bipolar_disorder
Q9CPW0	Cntnap2	DOID:3324	mood_disorder
Q9CPW0	Cntnap2	DOID:5419	schizophrenia
Q9CRB6	Tppp3	DOID:1561	cognitive_disorder
Q9CRB6	Tppp3	DOID:2468	psychotic_disorder
Q9CRB6	Tppp3	DOID:5419	schizophrenia
Q9CX00	Ist1	DOID:1094	attention_deficit_hyperactivity_disorder
Q9CZB0	Sdhc	DOID:1470	major_depressive_disorder
Q9CZB0	Sdhc	DOID:1561	cognitive_disorder
Q9CZB0	Sdhc	DOID:1595	endogenous_depression
Q9CZB0	Sdhc	DOID:1596	mental_depression
Q9CZB0	Sdhc	DOID:2468	psychotic_disorder
Q9CZB0	Sdhc	DOID:3312	bipolar_disorder
Q9CZB0	Sdhc	DOID:3324	mood_disorder
Q9CZB0	Sdhc	DOID:5419	schizophrenia
Q9CZN4	Shisa9	DOID:1561	cognitive_disorder
Q9CZN4	Shisa9	DOID:2468	psychotic_disorder
Q9CZN4	Shisa9	DOID:5419	schizophrenia
Q9D164	Fxyd6	DOID:1561	cognitive_disorder
Q9D164	Fxyd6	DOID:2468	psychotic_disorder
Q9D164	Fxyd6	DOID:5419	schizophrenia
Q9D1E6	Tbcb	DOID:1561	cognitive_disorder
Q9D1E6	Tbcb	DOID:2468	psychotic_disorder
Q9D1E6	Tbcb	DOID:5419	schizophrenia
Q9D1T0	Lingo1	DOID:1561	cognitive_disorder
Q9D1T0	Lingo1	DOID:2468	psychotic_disorder
Q9D1T0	Lingo1	DOID:5419	schizophrenia
Q9D4H1	Exoc2	DOID:1561	cognitive_disorder
Q9D4H1	Exoc2	DOID:2468	psychotic_disorder
Q9D4H1	Exoc2	DOID:5419	schizophrenia
Q9D6F4	Gabra4	DOID:12849	autistic_disorder
Q9D6F4	Gabra4	DOID:1561	cognitive_disorder
Q9D6F4	Gabra4	DOID:2468	psychotic_disorder
Q9D6F4	Gabra4	DOID:5419	schizophrenia
Q9D6Y7	Msra	DOID:1561	cognitive_disorder
Q9D6Y7	Msra	DOID:2468	psychotic_disorder
Q9D6Y7	Msra	DOID:3312	bipolar_disorder
Q9D6Y7	Msra	DOID:3324	mood_disorder
Q9D6Y7	Msra	DOID:5419	schizophrenia
Q9D710	Tmx2	DOID:1561	cognitive_disorder
Q9D710	Tmx2	DOID:2468	psychotic_disorder
Q9D710	Tmx2	DOID:5419	schizophrenia
Q9D8Y0	Efhd2	DOID:1307	dementia
Q9D8Y0	Efhd2	DOID:1561	cognitive_disorder
Q9D8Y0	Efhd2	DOID:2468	psychotic_disorder
Q9D8Y0	Efhd2	DOID:5419	schizophrenia
Q9DBG3	Ap2b1	DOID:9255	frontotemporal_dementia
Q9DBJ1	Pgam1	DOID:1561	cognitive_disorder
Q9DBJ1	Pgam1	DOID:2468	psychotic_disorder
Q9DBJ1	Pgam1	DOID:5419	schizophrenia
Q9DC07	Nebl	DOID:1561	cognitive_disorder
Q9DC07	Nebl	DOID:2468	psychotic_disorder
Q9DC07	Nebl	DOID:5419	schizophrenia
Q9EP69	Sacm1l	DOID:1470	major_depressive_disorder
Q9EP69	Sacm1l	DOID:1561	cognitive_disorder
Q9EP69	Sacm1l	DOID:1595	endogenous_depression
Q9EP69	Sacm1l	DOID:1596	mental_depression
Q9EP69	Sacm1l	DOID:3324	mood_disorder
Q9EPN1	Nbea	DOID:12849	autistic_disorder
Q9EPU5	Tnfrsf21	DOID:1561	cognitive_disorder
Q9EPU5	Tnfrsf21	DOID:2030	anxiety_disorder
Q9EPU5	Tnfrsf21	DOID:594	panic_disorder
Q9ERR1	Ndel1	DOID:1561	cognitive_disorder
Q9ERR1	Ndel1	DOID:2468	psychotic_disorder
Q9ERR1	Ndel1	DOID:5419	schizophrenia
Q9ES97	Rtn3	DOID:12217	Lewy_body_dementia
Q9ES97	Rtn3	DOID:1307	dementia
Q9ES97	Rtn3	DOID:1561	cognitive_disorder
Q9ES97-3	Rtn3	DOID:12217	Lewy_body_dementia
Q9ES97-3	Rtn3	DOID:1307	dementia
Q9ES97-3	Rtn3	DOID:1561	cognitive_disorder
Q9JIS5	Sv2a	DOID:1561	cognitive_disorder
Q9JIS5	Sv2a	DOID:2468	psychotic_disorder
Q9JIS5	Sv2a	DOID:5419	schizophrenia
Q9JJK2	Lancl2	DOID:1561	cognitive_disorder
Q9JJK2	Lancl2	DOID:2468	psychotic_disorder
Q9JJK2	Lancl2	DOID:5419	schizophrenia
Q9JJY3	Smpd3	DOID:1561	cognitive_disorder
Q9JJY3	Smpd3	DOID:2468	psychotic_disorder
Q9JJY3	Smpd3	DOID:5419	schizophrenia
Q9JK45	Kcnq5	DOID:1561	cognitive_disorder
Q9JK45	Kcnq5	DOID:2468	psychotic_disorder
Q9JK45	Kcnq5	DOID:5419	schizophrenia
Q9JKD3	Scamp5	DOID:12849	autistic_disorder
Q9JKF6	Nectin1	DOID:10933	obsessive-compulsive_disorder
Q9JKF6	Nectin1	DOID:1561	cognitive_disorder
Q9JKF6	Nectin1	DOID:2030	anxiety_disorder
Q9JL04	Fmn2	DOID:1059	intellectual_disability
Q9JLV5	Cul3	DOID:1561	cognitive_disorder
Q9JLV5	Cul3	DOID:2468	psychotic_disorder
Q9JLV5	Cul3	DOID:5419	schizophrenia
Q9JM63	Kcnj10	DOID:1059	intellectual_disability
Q9JM63	Kcnj10	DOID:12849	autistic_disorder
Q9JM96	Cdc42ep4	DOID:1561	cognitive_disorder
Q9JM96	Cdc42ep4	DOID:2030	anxiety_disorder
Q9JM96	Cdc42ep4	DOID:594	panic_disorder
Q9JMK2	Csnk1e	DOID:1561	cognitive_disorder
Q9JMK2	Csnk1e	DOID:2468	psychotic_disorder
Q9JMK2	Csnk1e	DOID:3312	bipolar_disorder
Q9JMK2	Csnk1e	DOID:3324	mood_disorder
Q9JMK2	Csnk1e	DOID:5419	schizophrenia
Q9QWY8-2	Asap1	DOID:1561	cognitive_disorder
Q9QWY8-2	Asap1	DOID:2030	anxiety_disorder
Q9QWY8-2	Asap1	DOID:2055	post-traumatic_stress_disorder
Q9QWY8-2	Asap1	DOID:6088	acute_stress_disorder
Q9QXB9	Drg2	DOID:1561	cognitive_disorder
Q9QXB9	Drg2	DOID:2468	psychotic_disorder
Q9QXB9	Drg2	DOID:5419	schizophrenia
Q9QXJ1	Apbb1	DOID:11870	Pick's_disease
Q9QXL2	Kif21a	DOID:1561	cognitive_disorder
Q9QXL2	Kif21a	DOID:2468	psychotic_disorder
Q9QXL2	Kif21a	DOID:5419	schizophrenia
Q9QXV8	Spry2	DOID:1470	major_depressive_disorder
Q9QXV8	Spry2	DOID:1561	cognitive_disorder
Q9QXV8	Spry2	DOID:1595	endogenous_depression
Q9QXV8	Spry2	DOID:1596	mental_depression
Q9QXV8	Spry2	DOID:3324	mood_disorder
Q9QXY6	Ehd3	DOID:1470	major_depressive_disorder
Q9QXY6	Ehd3	DOID:1561	cognitive_disorder
Q9QXY6	Ehd3	DOID:1595	endogenous_depression
Q9QXY6	Ehd3	DOID:1596	mental_depression
Q9QXY6	Ehd3	DOID:3324	mood_disorder
Q9QXY7	Xk	DOID:1561	cognitive_disorder
Q9QXY7	Xk	DOID:2468	psychotic_disorder
Q9QXY7	Xk	DOID:3324	mood_disorder
Q9QXY7	Xk	DOID:5419	schizophrenia
Q9QY76	Vapb	DOID:1561	cognitive_disorder
Q9QY76	Vapb	DOID:2468	psychotic_disorder
Q9QY76	Vapb	DOID:5419	schizophrenia
Q9QYB5	Add3	DOID:1059	intellectual_disability
Q9QYI5	Dnajb2	DOID:1307	dementia
Q9QYI5	Dnajb2	DOID:1561	cognitive_disorder
Q9QYI5	Dnajb2	DOID:9255	frontotemporal_dementia
Q9QYJ3	Dnajb1	DOID:1059	intellectual_disability
Q9QYJ3	Dnajb1	DOID:14042	bipolar_I_disorder
Q9QYJ3	Dnajb1	DOID:1561	cognitive_disorder
Q9QYJ3	Dnajb1	DOID:2468	psychotic_disorder
Q9QYJ3	Dnajb1	DOID:3312	bipolar_disorder
Q9QYJ3	Dnajb1	DOID:3324	mood_disorder
Q9QYJ3	Dnajb1	DOID:5419	schizophrenia
Q9QYS2	Grm3	DOID:1470	major_depressive_disorder
Q9QYS2	Grm3	DOID:1561	cognitive_disorder
Q9QYS2	Grm3	DOID:1595	endogenous_depression
Q9QYS2	Grm3	DOID:1596	mental_depression
Q9QYS2	Grm3	DOID:2468	psychotic_disorder
Q9QYS2	Grm3	DOID:3312	bipolar_disorder
Q9QYS2	Grm3	DOID:3324	mood_disorder
Q9QYS2	Grm3	DOID:5419	schizophrenia
Q9QYX7	Pclo	DOID:1470	major_depressive_disorder
Q9QYX7	Pclo	DOID:1561	cognitive_disorder
Q9QYX7	Pclo	DOID:1595	endogenous_depression
Q9QYX7	Pclo	DOID:1596	mental_depression
Q9QYX7	Pclo	DOID:2468	psychotic_disorder
Q9QYX7	Pclo	DOID:3312	bipolar_disorder
Q9QYX7	Pclo	DOID:3324	mood_disorder
Q9QYX7	Pclo	DOID:5419	schizophrenia
Q9QZB9	Dctn5	DOID:1094	attention_deficit_hyperactivity_disorder
Q9QZB9	Dctn5	DOID:12849	autistic_disorder
Q9QZB9	Dctn5	DOID:1470	major_depressive_disorder
Q9QZB9	Dctn5	DOID:1561	cognitive_disorder
Q9QZB9	Dctn5	DOID:1595	endogenous_depression
Q9QZB9	Dctn5	DOID:1596	mental_depression
Q9QZB9	Dctn5	DOID:2468	psychotic_disorder
Q9QZB9	Dctn5	DOID:3312	bipolar_disorder
Q9QZB9	Dctn5	DOID:3324	mood_disorder
Q9QZB9	Dctn5	DOID:5419	schizophrenia
Q9QZS3	Numb	DOID:1561	cognitive_disorder
Q9QZS3	Numb	DOID:3312	bipolar_disorder
Q9QZS3	Numb	DOID:3324	mood_disorder
Q9R0K7	Atp2b2	DOID:12849	autistic_disorder
Q9R0N5	Syt5	DOID:1561	cognitive_disorder
Q9R0N5	Syt5	DOID:2468	psychotic_disorder
Q9R0N5	Syt5	DOID:5419	schizophrenia
Q9R0N8	Syt6	DOID:12849	autistic_disorder
Q9R0N8	Syt6	DOID:1561	cognitive_disorder
Q9R0N8	Syt6	DOID:2468	psychotic_disorder
Q9R0N8	Syt6	DOID:3312	bipolar_disorder
Q9R0N8	Syt6	DOID:3324	mood_disorder
Q9R0N8	Syt6	DOID:5419	schizophrenia
Q9R1Q8	Tagln3	DOID:1561	cognitive_disorder
Q9R1Q8	Tagln3	DOID:2468	psychotic_disorder
Q9R1Q8	Tagln3	DOID:5419	schizophrenia
Q9WTU3	Scn8a	DOID:1059	intellectual_disability
Q9WTU3	Scn8a	DOID:1561	cognitive_disorder
Q9WTU3	Scn8a	DOID:2468	psychotic_disorder
Q9WTU3	Scn8a	DOID:3312	bipolar_disorder
Q9WTU3	Scn8a	DOID:3324	mood_disorder
Q9WTU3	Scn8a	DOID:5419	schizophrenia
Q9WV18	Gabbr1	DOID:10933	obsessive-compulsive_disorder
Q9WV18	Gabbr1	DOID:12849	autistic_disorder
Q9WV18	Gabbr1	DOID:1561	cognitive_disorder
Q9WV18	Gabbr1	DOID:2030	anxiety_disorder
Q9WV18	Gabbr1	DOID:2468	psychotic_disorder
Q9WV18	Gabbr1	DOID:3324	mood_disorder
Q9WV18	Gabbr1	DOID:535	sleep_disorder
Q9WV18	Gabbr1	DOID:5419	schizophrenia
Q9WV18	Gabbr1	DOID:8986	narcolepsy
Q9WV55	Vapa	DOID:1561	cognitive_disorder
Q9WV55	Vapa	DOID:3312	bipolar_disorder
Q9WV55	Vapa	DOID:3324	mood_disorder
Q9WV60	Gsk3b	DOID:1094	attention_deficit_hyperactivity_disorder
Q9WV60	Gsk3b	DOID:14042	bipolar_I_disorder
Q9WV60	Gsk3b	DOID:1470	major_depressive_disorder
Q9WV60	Gsk3b	DOID:1561	cognitive_disorder
Q9WV60	Gsk3b	DOID:1595	endogenous_depression
Q9WV60	Gsk3b	DOID:1596	mental_depression
Q9WV60	Gsk3b	DOID:2468	psychotic_disorder
Q9WV60	Gsk3b	DOID:3312	bipolar_disorder
Q9WV60	Gsk3b	DOID:3324	mood_disorder
Q9WV60	Gsk3b	DOID:5419	schizophrenia
Q9WV92	Epb41l3	DOID:1561	cognitive_disorder
Q9WV92	Epb41l3	DOID:2468	psychotic_disorder
Q9WV92	Epb41l3	DOID:5419	schizophrenia
Q9WVQ1	Magi2	DOID:1470	major_depressive_disorder
Q9WVQ1	Magi2	DOID:1561	cognitive_disorder
Q9WVQ1	Magi2	DOID:1595	endogenous_depression
Q9WVQ1	Magi2	DOID:1596	mental_depression
Q9WVQ1	Magi2	DOID:2468	psychotic_disorder
Q9WVQ1	Magi2	DOID:3312	bipolar_disorder
Q9WVQ1	Magi2	DOID:3324	mood_disorder
Q9WVQ1	Magi2	DOID:5419	schizophrenia
Q9Z0E0	Ncdn	DOID:9255	frontotemporal_dementia
Q9Z0R9	Fads2	DOID:1094	attention_deficit_hyperactivity_disorder
Q9Z0R9	Fads2	DOID:1561	cognitive_disorder
Q9Z0R9	Fads2	DOID:3312	bipolar_disorder
Q9Z0R9	Fads2	DOID:3324	mood_disorder
Q9Z0V2	Kcnd2	DOID:12849	autistic_disorder
Q9Z1B3	Plcb1	DOID:1561	cognitive_disorder
Q9Z1B3	Plcb1	DOID:2468	psychotic_disorder
Q9Z1B3	Plcb1	DOID:5419	schizophrenia
Q9Z1L5	Cacna2d3	DOID:1561	cognitive_disorder
Q9Z1L5	Cacna2d3	DOID:2468	psychotic_disorder
Q9Z1L5	Cacna2d3	DOID:3312	bipolar_disorder
Q9Z1L5	Cacna2d3	DOID:3324	mood_disorder
Q9Z1L5	Cacna2d3	DOID:5419	schizophrenia
Q9Z218	Dpp6	DOID:1059	intellectual_disability
Q9Z218	Dpp6	DOID:1094	attention_deficit_hyperactivity_disorder
Q9Z218	Dpp6	DOID:1561	cognitive_disorder
Q9Z218	Dpp6	DOID:2030	anxiety_disorder
Q9Z218	Dpp6	DOID:2055	post-traumatic_stress_disorder
Q9Z218	Dpp6	DOID:6088	acute_stress_disorder
Q9Z2H2	Rgs6	DOID:1561	cognitive_disorder
Q9Z2H2	Rgs6	DOID:2468	psychotic_disorder
Q9Z2H2	Rgs6	DOID:5419	schizophrenia
Q9Z2H5	Epb41l1	DOID:1059	intellectual_disability
Q9Z2H5	Epb41l1	DOID:1561	cognitive_disorder
Q9Z2H5	Epb41l1	DOID:2468	psychotic_disorder
Q9Z2H5	Epb41l1	DOID:5419	schizophrenia
Q9Z2W9	Gria3	DOID:1059	intellectual_disability
Q9Z2W9	Gria3	DOID:1561	cognitive_disorder
Q9Z2W9	Gria3	DOID:2468	psychotic_disorder
Q9Z2W9	Gria3	DOID:5419	schizophrenia
Q9Z351-12	Kcnq2	DOID:1059	intellectual_disability
Q9Z351-12	Kcnq2	DOID:1561	cognitive_disorder
Q9Z351-12	Kcnq2	DOID:2468	psychotic_disorder
Q9Z351-12	Kcnq2	DOID:5419	schizophrenia
