# Supplementary material
Source: Research Square preprint supplement (doi:10.21203/rs.3.rs-8597698/v1)
Supplement: Supplementary file 7 [file 519d5763665121dfe2d09852.xlsx]

## Sheet: Sheet1
Identified proteins with corresponding IDs and annotations
uniprotID	mouseGeneSymbol	log2FC(TurboID/WT)	pval(TurboID/WT)	Previously reported presynaptic protein (SynaptomeDB)	Associated with neurological or psychiatric disorders	Functionally uncharacterized protein
A2ALI5	Ajap1	2.46376	0.00561537		YES	YES
O08539	Bin1	4.3186	5.81432e-05	YES	YES
O08579	Emd	2.06808	0.00203716	YES
O55033	Nck2	4.31148	3.36496e-05		YES
O55042;O55042-2	Snca	4.63201	0.000171904	YES	YES
O88878	Zfand5	4.13137	0.000310892
P10637	Mapt	3.16219	0.000745326	YES	YES
P10639	Txn1	3.34282	0.000400349	YES	YES
P28667	Marcksl1	2.24278	0.033685	YES
P43407	Sdc2	2.78029	0.0312106
P58802	Tbc1d10a	2.35717	0.00296262			YES
P58871	Tnks1bp1	4.21986	0.000232655			YES
P60879	Snap25	3.52069	0.000192882	YES	YES
P60879-2	Snap25	4.924	0.00247666	YES	YES
P63040	Cplx1	2.4409	0.0107712	YES
P70290	Mpp1	2.65871	0.00074139
P70302	Stim1	2.56265	0.00226141	YES
P84086	Cplx2	3.65203	0.00121029	YES	YES
P97792	Cxadr	2.54294	0.00443298	YES
P97797;P97797-2	Sirpa	2.90316	0.000743105	YES	YES
P97798;P97798-2;P97798-3;P97798-5	Neo1	2.50584	0.0023301	YES
Q14CH0-2	Fam171b	2.59474	0.00156654
Q3TY60-2	Fam131b	5.04202	2.91626e-05	YES		YES
Q3V3V9-2	Carmil2	2.39621	0.00552118
Q5DU41;Q5DU41-2	Lrrc8b	2.07618	0.0113585			YES
Q5HZI2	C2cd4c	3.34941	0.000137561	YES
Q5SP85;Q5SP85-2	Ccdc85a	4.08795	0.000363373	YES		YES
Q68EF6	Begain	2.51957	0.00640165
Q6DFV3	Arhgap21	2.23211	0.000930564		YES
Q6GQU6	Lingo3	2.70146	0.0231419			YES
Q6P1J0	Maneal	2.19756	0.00101607			YES
Q6P4U0	Thsd7b	2.91374	0.00347938			YES
Q6P6I6;Q6P6I6-2	Polr2m	2.34406	0.0259719	YES
Q6P8I4	Pcnp	2.44778	0.00189414			YES
Q6RHR9;Q6RHR9-3	Magi1	3.32887	0.000490861	YES	YES
Q6Y685	Tacc1	2.1258	0.00181025
Q80Y55	Bsdc1	2.13282	0.00883956			YES
Q80Z38-3	Shank2	3.87837	0.00413325	YES	YES
Q8BGD9	Eif4b	4.11235	0.000663241			YES
Q8BIF0;Q8BIF0-2	Cd99l2	4.15273	0.000145545	YES
Q8BR92	Pakap	2.10319	0.00173988	YES
Q8BWS5	Gprin3	2.60764	0.0114415		YES	YES
Q8BYW1;Q8BYW1-3	Arhgap25	2.17788	0.000204469			YES
Q8C3W1	2310022B05Rik	2.7851	0.0133026			YES
Q8C5P7	Tdrp	4.45463	0.00818587			YES
Q8C8T7	Elfn1	2.45201	0.0192726
Q8CCJ4	Amer2	2.63948	0.0056021	YES		YES
Q8K012;Q8K012-2	Fnbp1l	4.37061	9.45006e-05	YES		YES
Q8K2J7;Q8K2J7-2	Rell1	2.09221	0.00345415			YES
Q8R1B0	Stac2	3.75455	0.000951202
Q8R1B5	Cplx3	5.52364	0.00186511
Q8R1Y2	Bmerb1	3.66918	0.000163464	YES
Q91WJ0	Frs3	4.03129	0.000179937			YES
Q91ZZ3	Sncb	3.57453	0.000313357	YES	YES
Q924S8	Spred1	2.45523	0.00150253	YES	YES
Q99JX3	Gorasp2	3.40352	0.000195063			YES
Q99M51	Nck1	5.16983	0.000171085
Q9CRB6	Tppp3	2.85847	0.00347009		YES
Q9D7V2	Lysmd2	2.30493	0.00217165			YES
Q9D8Y0	Efhd2	2.15903	0.000989703	YES	YES
Q9ERB0	Snap29	3.85262	0.00131598	YES
Q9JM96	Cdc42ep4	4.96428	0.000824939		YES
Q9QY39	Pdzd4	2.3939	0.011348		YES	YES
Q9R0N7-4	Syt7	2.87388	0.000578051	YES
Q9R0N8	Syt6	2.26395	0.00041836	YES	YES
Q9Z0F7	Sncg	3.16751	0.00727903		YES
