# Supplementary material
Source: Research Square preprint supplement (doi:10.21203/rs.3.rs-8597698/v1)
Supplement: Supplementary file 8 [file be5663be5e42c0f9814cc4a5.xlsx]

## Sheet: Sheet1
Disease annotations for identified disease-associated proteins
uniprotID	mouseGeneSymbol	DOID	Description
A2ALI5	Ajap1	DOID:1470	major_depressive_disorder
A2ALI5	Ajap1	DOID:1561	cognitive_disorder
A2ALI5	Ajap1	DOID:1595	endogenous_depression
A2ALI5	Ajap1	DOID:1596	mental_depression
A2ALI5	Ajap1	DOID:2030	anxiety_disorder
A2ALI5	Ajap1	DOID:3324	mood_disorder
O08539	Bin1	DOID:1307	dementia
O08539	Bin1	DOID:1561	cognitive_disorder
O55033	Nck2	DOID:1307	dementia
O55033	Nck2	DOID:1561	cognitive_disorder
O55042;O55042-2	Snca	DOID:12217	Lewy_body_dementia
O55042;O55042-2	Snca	DOID:1307	dementia
O55042;O55042-2	Snca	DOID:1561	cognitive_disorder
O55042;O55042-2	Snca	DOID:1596	mental_depression
O55042;O55042-2	Snca	DOID:2468	psychotic_disorder
O55042;O55042-2	Snca	DOID:3324	mood_disorder
O55042;O55042-2	Snca	DOID:535	sleep_disorder
O55042;O55042-2	Snca	DOID:5419	schizophrenia
O55042;O55042-2	Snca	DOID:9091	REM_sleep_behavior_disorder
P10637	Mapt	DOID:11870	Pick's_disease
P10637	Mapt	DOID:12217	Lewy_body_dementia
P10637	Mapt	DOID:1307	dementia
P10637	Mapt	DOID:1561	cognitive_disorder
P10637	Mapt	DOID:2468	psychotic_disorder
P10637	Mapt	DOID:5419	schizophrenia
P10637	Mapt	DOID:8725	vascular_dementia
P10637	Mapt	DOID:9255	frontotemporal_dementia
P10639	Txn1	DOID:1561	cognitive_disorder
P10639	Txn1	DOID:2468	psychotic_disorder
P10639	Txn1	DOID:5419	schizophrenia
P60879	Snap25	DOID:1059	intellectual_disability
P60879	Snap25	DOID:1094	attention_deficit_hyperactivity_disorder
P60879	Snap25	DOID:12217	Lewy_body_dementia
P60879	Snap25	DOID:12849	autistic_disorder
P60879	Snap25	DOID:1307	dementia
P60879	Snap25	DOID:1470	major_depressive_disorder
P60879	Snap25	DOID:1561	cognitive_disorder
P60879	Snap25	DOID:1595	endogenous_depression
P60879	Snap25	DOID:1596	mental_depression
P60879	Snap25	DOID:2468	psychotic_disorder
P60879	Snap25	DOID:3324	mood_disorder
P60879	Snap25	DOID:5419	schizophrenia
P60879	Snap25	DOID:9255	frontotemporal_dementia
P60879-2	Snap25	DOID:1059	intellectual_disability
P60879-2	Snap25	DOID:1094	attention_deficit_hyperactivity_disorder
P60879-2	Snap25	DOID:12217	Lewy_body_dementia
P60879-2	Snap25	DOID:12849	autistic_disorder
P60879-2	Snap25	DOID:1307	dementia
P60879-2	Snap25	DOID:1470	major_depressive_disorder
P60879-2	Snap25	DOID:1561	cognitive_disorder
P60879-2	Snap25	DOID:1595	endogenous_depression
P60879-2	Snap25	DOID:1596	mental_depression
P60879-2	Snap25	DOID:2468	psychotic_disorder
P60879-2	Snap25	DOID:3324	mood_disorder
P60879-2	Snap25	DOID:5419	schizophrenia
P60879-2	Snap25	DOID:9255	frontotemporal_dementia
P84086	Cplx2	DOID:1094	attention_deficit_hyperactivity_disorder
P84086	Cplx2	DOID:1561	cognitive_disorder
P84086	Cplx2	DOID:2468	psychotic_disorder
P84086	Cplx2	DOID:5419	schizophrenia
P97797;P97797-2	Sirpa	DOID:1561	cognitive_disorder
P97797;P97797-2	Sirpa	DOID:2468	psychotic_disorder
P97797;P97797-2	Sirpa	DOID:5419	schizophrenia
Q6DFV3	Arhgap21	DOID:1561	cognitive_disorder
Q6DFV3	Arhgap21	DOID:2030	anxiety_disorder
Q6DFV3	Arhgap21	DOID:2055	post-traumatic_stress_disorder
Q6DFV3	Arhgap21	DOID:6088	acute_stress_disorder
Q6RHR9;Q6RHR9-3	Magi1	DOID:1561	cognitive_disorder
Q6RHR9;Q6RHR9-3	Magi1	DOID:2468	psychotic_disorder
Q6RHR9;Q6RHR9-3	Magi1	DOID:3312	bipolar_disorder
Q6RHR9;Q6RHR9-3	Magi1	DOID:3324	mood_disorder
Q6RHR9;Q6RHR9-3	Magi1	DOID:5419	schizophrenia
Q80Z38-3	Shank2	DOID:1059	intellectual_disability
Q80Z38-3	Shank2	DOID:12849	autistic_disorder
Q8BWS5	Gprin3	DOID:12217	Lewy_body_dementia
Q8BWS5	Gprin3	DOID:1307	dementia
Q8BWS5	Gprin3	DOID:1561	cognitive_disorder
Q91ZZ3	Sncb	DOID:12217	Lewy_body_dementia
Q91ZZ3	Sncb	DOID:1307	dementia
Q91ZZ3	Sncb	DOID:1561	cognitive_disorder
Q924S8	Spred1	DOID:1561	cognitive_disorder
Q924S8	Spred1	DOID:3312	bipolar_disorder
Q924S8	Spred1	DOID:3324	mood_disorder
Q9CRB6	Tppp3	DOID:1561	cognitive_disorder
Q9CRB6	Tppp3	DOID:2468	psychotic_disorder
Q9CRB6	Tppp3	DOID:5419	schizophrenia
Q9D8Y0	Efhd2	DOID:1307	dementia
Q9D8Y0	Efhd2	DOID:1561	cognitive_disorder
Q9D8Y0	Efhd2	DOID:2468	psychotic_disorder
Q9D8Y0	Efhd2	DOID:5419	schizophrenia
Q9JM96	Cdc42ep4	DOID:1561	cognitive_disorder
Q9JM96	Cdc42ep4	DOID:2030	anxiety_disorder
Q9JM96	Cdc42ep4	DOID:594	panic_disorder
Q9QY39	Pdzd4	DOID:1059	intellectual_disability
Q9R0N8	Syt6	DOID:12849	autistic_disorder
Q9R0N8	Syt6	DOID:1561	cognitive_disorder
Q9R0N8	Syt6	DOID:2468	psychotic_disorder
Q9R0N8	Syt6	DOID:3312	bipolar_disorder
Q9R0N8	Syt6	DOID:3324	mood_disorder
Q9R0N8	Syt6	DOID:5419	schizophrenia
Q9Z0F7	Sncg	DOID:12217	Lewy_body_dementia
Q9Z0F7	Sncg	DOID:1307	dementia
Q9Z0F7	Sncg	DOID:1561	cognitive_disorder
