# Supplementary material
Source: Research Square preprint supplement (doi:10.21203/rs.3.rs-8597698/v1)
Supplement: Supplementary file 9 [file e7b88b172a4498c31240ebdf.xlsx]

## Sheet: Sheet1
MS-quantified proteins in ActProX-ID samples with relative abundance to control and corresponding FDR values
uniprotID	geneSymbol	log2FC(FR-S/HC)	pval(FR-S/HC)	log2FC(FR-S/NF)	pval(FR-S/NF)	log2FC(FR-L/HC)	pval(FR-L/home)	log2FC(FR-L/NF)	pval(FR-L/NF)
A0A1W2P872;A0A1W2P872-2	Nova2	-0.259055	0.301578	-0.293234	0.340806	0.0578988	0.73269	0.0237195	0.921316
A1L317	Krt24	-2.15262	0.358468	-1.55275	0.361072	-1.27553	0.476858	-0.675662	0.434328
A2A432;A2A432-2	Cul4b	0.484987	0.158928	0.539503	0.0757753	0.436242	0.0898173	0.490759	0.00930826
A2A5R2	Arfgef2	1.08586	0.0864595	0.992151	0.0956155	0.718764	0.16395	0.625054	0.189405
A2A690;A2A690-2	Tanc2	1.83302	0.0082548	2.26286	0.0100521	1.78854	0.000595298	2.21839	0.00370352
A2A699	Fam171a2	3.81356	0.0272697	3.76543	0.0123113	3.47067	0.0184838	3.42254	0.0036487
A2A8L1	Chd5	0.626511	0.384001	1.06027	0.0596536	0.241882	0.702016	0.675641	0.0996213
A2A8L5	Ptprf	2.75367	0.122449	4.37767	0.00172705	3.04848	0.0991564	4.67249	0.00169146
A2A8U2;A2A8U2-2;A2A8U2-3	Tmem201	1.49037	0.127568	1.40465	0.120067	1.49169	0.0367486	1.40596	0.0193532
A2A8Z1;A2A8Z1-2	Osbpl9	0.832055	0.175705	0.978815	0.089916	0.468202	0.324562	0.614961	0.138409
A2AAE1;A2AAE1-2;A2AAE1-3;A2AAE1-4;A2AAE1-6	Kiaa1109	3.19903	0.0419539	3.73324	0.00798293	2.98521	0.0230355	3.51942	0.000336528
A2ADY9	Ddi2	-0.667816	0.244498	-0.192817	0.613188	-0.836204	0.165009	-0.361204	0.368108
A2AFR3;A2AFR3-2;A2AFR3-3	Frmpd4	-0.403431	0.650742	0.367817	0.658468	-0.425394	0.390711	0.345854	0.354352
A2AG50;A2AG50-2	Map7d2	0.434663	0.355024	0.250023	0.446798	0.774833	0.128533	0.590194	0.104163
A2AGT5;A2AGT5-2;A2AGT5-3	Ckap5	0.0328271	0.842062	0.443397	0.0335946	0.0738433	0.675951	0.484413	0.0320563
A2AHC3	Camsap1	3.51822	0.00208261	4.1152	0.00349212	3.20124	3.72915e-05	3.79822	0.00130819
A2AHL1	Ano3	3.86397	0.00431914	4.7511	0.00378167	3.46392	0.000427927	4.35105	0.00121467
A2AJA9;A2AJA9-2	Ajm1	0.719041	0.111366	0.875566	0.04839	0.495867	0.0940479	0.652392	0.0135483
A2AJI0;A2AJI0-2	Map7d1	-0.679727	0.100813	-0.536699	0.158306	-0.612535	0.0385708	-0.469507	0.0645284
A2AKG8	Focad	0.812337	0.392753	0.344762	0.715957	0.347025	0.678822	-0.12055	0.889574
A2ALI5	Ajap1	0.370897	0.639339	0.560112	0.395867	-0.996637	0.313847	-0.807422	0.341488
A2ALS5;A2ALS5-2;A2ALS5-3	Rap1gap	1.4855	0.011946	1.75913	0.00536424	1.14986	0.00260738	1.42349	0.000393446
A2ALU4;A2ALU4-2	Shroom2	0.40478	0.29039	1.57072	0.0676046	0.274055	0.251106	1.43999	0.0662014
A2AN08;A2AN08-3;A2AN08-5	Ubr4	0.499124	0.0452225	0.823613	0.00807159	0.524929	0.0330382	0.849419	0.00586502
A2ANU3	Syndig1	1.07345	0.0901178	1.72383	0.0456766	0.478937	0.2408	1.12932	0.0869238
A2AP18-2	Plch2	1.24174	0.00958494	1.60172	0.00361349	0.73824	0.000484857	1.09822	2.73776e-05
A2APX8;A2APX8-2;A2APX8-3	Scn1a	4.32252	0.0332533	5.93152	0.00141132	3.83915	0.0434589	5.44814	0.00133407
A2AQ25	Skt	1.91534	0.0891644	2.22571	0.0656082	2.0644	0.00121844	2.37477	0.00205941
A2ARP1;A2ARP1-2;A2ARP1-3;A2ARP1-6;A2ARP1-7	Ppip5k1	-0.327145	0.381069	-0.108296	0.761497	-0.612081	0.362248	-0.393231	0.545463
A2ARS0	Ankrd63	2.24599	0.0534467	1.46778	0.210337	1.98685	0.0429944	1.20864	0.233968
A2ASS6	Ttn	0.467278	0.750043	0.491343	0.700594	-1.11074	0.253125	-1.08668	0.0873012
A2ASZ8-3;A2ASZ8-5	Slc25a25	0.457701	0.652089	-0.197947	0.585491	1.01513	0.33306	0.359481	0.267426
A2AT37	Upf2	-2.43843	0.43243	-0.693933	0.401378	-2.23538	0.456438	-0.490882	0.184764
A2AWA9	Rabgap1	0.532822	0.331889	0.521517	0.176172	0.348289	0.492982	0.336983	0.302623
A2CG49;A2CG49-2;A2CG49-7	Kalrn	0.546391	0.0780295	1.79889	0.154151	0.345541	0.089455	1.59804	0.18893
A2RSJ4	Uhrf1bp1l	1.74386	0.0414543	0.97568	0.255662	2.00405	0.00098081	1.23586	0.0684475
A2RT62	Fbxl16	0.04708	0.663997	0.552069	0.107838	0.165495	0.211516	0.670484	0.0690504
A6H5Z3	Exoc6b	2.92609	0.0134229	3.34745	0.0289892	1.75034	0.148846	2.17169	0.149838
A6H630	Armt1	-0.590576	0.372861	0.389305	0.731006	-0.323269	0.369656	0.656612	0.520275
A6H6A9	Rabgap1l	3.80296	0.00263621	1.89161	0.0506215	3.51236	0.00239517	1.60101	0.065963
A6H6A9-3	Rabgap1l	1.87543	0.112715	1.73803	0.132739	1.61277	0.00584354	1.47537	0.00720187
A6H8H5	Kcnb2	0.693099	0.407768	1.68172	0.241352	0.106527	0.851284	1.09515	0.377374
A6X919	Dpy19l1	1.64201	0.0136962	1.36913	0.0216529	0.288063	0.804237	0.0151819	0.989477
B0V2N1;B0V2N1-2;B0V2N1-3;B0V2N1-4;B0V2N1-6	Ptprs	1.5276	0.0036508	1.93767	0.00541619	1.37762	0.000247895	1.78769	0.00284704
B1AR13	Cisd3	-0.928103	0.158783	-0.391114	0.621766	-0.88886	0.051115	-0.35187	0.585529
B1AS29	Grik3	1.04639	0.268773	1.64509	0.208348	-0.0467027	0.961974	0.551998	0.663742
B1AWN6	Scn2a	3.63066	0.00931008	4.33561	0.00255363	3.01508	0.00611132	3.72003	0.000605524
B1AXH1	Nhsl2	1.48565	0.230961	1.44938	0.15014	-0.0978098	0.906795	-0.13408	0.76298
B1AXV0	Frrs1l	1.30686	0.00190951	1.24465	0.030661	0.804287	0.0157245	0.742078	0.129652
B1AY13	Usp24	0.679136	0.157628	1.00881	0.227627	0.887976	0.0106344	1.21765	0.122112
B1AZP2-2	Dlgap4	2.84992	0.00269842	3.36905	0.00174742	2.38412	0.000100233	2.90325	0.000155267
B2RQC6;B2RQC6-2	Cad	-0.799168	0.106303	0.673538	0.0635573	-0.836353	0.0574093	0.636353	0.0129059
B2RRE7	Otud4	0.183312	0.787205	0.248641	0.674841	-0.424586	0.529478	-0.359257	0.53497
B2RSH2	Gnai1	0.91386	0.0147219	0.907581	0.0136023	0.728895	0.00826992	0.722616	0.00667032
B2RUJ5;B2RUJ5-3	Apba1	1.26215	0.0323144	-0.0971537	0.721049	1.3647	0.0171686	0.00539811	0.977152
B2RXC1	Trappc11	0.323709	0.00343644	0.53175	0.0712774	0.292199	0.0299137	0.50024	0.0947145
B2RXS4	Plxnb2	-0.501741	0.252737	0.343251	0.658414	0.0376854	0.756051	0.882678	0.230406
B5TVM2;B5TVM2-2;B5TVM2-3;B5TVM2-4;B5TVM2-5	Ildr2	2.26713	0.0368939	1.57553	0.222696	1.98952	0.0310092	1.29792	0.26887
B9EHT4	Clip3	1.42045	0.294915	1.16829	0.37607	1.27973	0.233863	1.02757	0.320318
B9EJ80	Pdzd8	2.32592	0.0255244	2.19233	0.0858152	1.48	0.0846558	1.3464	0.230052
B9EJ86	Osbpl8	0.654032	0.0401835	0.880535	0.0125537	0.382309	0.0793742	0.608812	0.0133785
B9EJA2;B9EJA2-2;B9EJA2-3;B9EJA2-4;B9EJA2-5	Cttnbp2	1.50633	0.330232	2.47915	0.0910245	1.54239	0.31634	2.51521	0.0849099
B9EJI9	Tmem229a	-0.89368	0.115857	-0.750935	0.192532	-0.96884	0.194435	-0.826094	0.270441
B9EKR1	Ptprz1	-0.175416	0.256304	-0.308217	0.0771083	-0.0232499	0.795959	-0.156051	0.124315
C0HK79;C0HK80	Arxes1;Arxes2	-0.52171	0.172068	-0.853802	0.0506721	-0.766075	0.0707406	-1.09817	0.0234755
C0HKE1;C0HKE2;C0HKE3;C0HKE4;C0HKE5;C0HKE6;C0HKE7;C0HKE8;C0HKE9;Q8BFU2;Q8CGP5;Q8CGP6;Q8CGP7;Q8R1M2	H2ac11;H2ac12;H2ac13;H2ac15;H2ac4;H2ac6;H2ac7;H2ac8;H2aj;H2aw;Hist1h2af;Hist1h2an;Hist1h2ao;Hist1h2ap	-0.399144	0.621907	-0.255178	0.467672	-0.431989	0.600906	-0.288024	0.455638
D3YVE8	Slc35g2	1.83069	0.0699157	2.17	0.0478149	2.49333	0.000722444	2.83264	0.000990029
D3YVF0	Akap5	0.637347	0.28988	0.67727	0.379501	0.330602	0.475002	0.370525	0.577094
D3YWQ0;D3YWQ0-2	Dgki	1.53405	0.225862	1.65949	0.235912	1.35937	0.263605	1.48481	0.272227
D3YXJ0;D3YXJ0-2	Dgkh	1.99361	0.0294162	2.15021	0.0256618	1.58641	0.0161713	1.743	0.0149415
D3YXK2	Safb	-0.646698	0.418441	-0.625287	0.192803	-0.258244	0.725654	-0.236833	0.523856
D3YZI9;D3YZI9-2	Pgbd5	0.988519	0.043715	1.40054	0.000554398	0.568657	0.181178	0.98068	0.00414457
D3YZP9	Ccdc6	-1.64679	0.189769	-0.766776	0.454074	-0.803367	0.38921	0.0766474	0.915526
D3YZU1	Shank1	0.145577	0.53536	0.12579	0.514834	0.0566327	0.811762	0.0368458	0.852303
D3Z7P3	Gls	-0.404055	0.16004	-0.289657	0.254229	-0.394995	0.0244508	-0.280598	0.0165556
E9PUL5	Prrt2	3.36591	0.00722396	3.75521	0.00348453	3.01477	0.00118023	3.40407	0.000150491
E9PV24;E9PV24-2	Fga	1.63278	0.199264	0.39052	0.0758957	1.28298	0.362132	0.0407251	0.954783
E9PV86	Mctp1	3.58227	0.0365076	3.44517	0.0204221	3.32808	0.0143856	3.19098	0.00134531
E9PVA8	Gcn1	-1.17573	0.326579	0.0156221	0.975443	-1.11114	0.344633	0.080217	0.865227
E9PZ19	Igsf9b	2.63572	0.0012088	3.10658	0.00112337	2.31859	1.87355e-05	2.78945	0.000188262
E9Q137;E9Q137-2	Tex264	-0.27736	0.566185	0.950466	0.350575	-0.432614	0.348245	0.795213	0.418559
E9Q3L2	Pi4ka	1.59873	0.00948138	1.67331	0.00704659	1.19246	0.00648527	1.26704	0.00374343
E9Q401	Ryr2	0.549911	0.0298123	0.918694	0.00156874	0.753214	0.00805767	1.122	0.00038621
E9Q4F2	Klhl18	-2.52467	0.123775	-0.465931	0.563839	-1.72795	0.222565	0.330788	0.577238
E9Q4Z2	Acacb	-0.390845	0.512309	-1.14511	0.125262	-0.369994	0.274854	-1.12426	0.0398481
E9Q557	Dsp	-2.88786	0.36484	-1.30056	0.0767447	-2.93981	0.350556	-1.35251	0.00480219
E9Q5C9	Nolc1	0.0676193	0.945851	-0.767849	0.446897	0.242243	0.71651	-0.593226	0.367331
E9Q634	Myo1e	-2.05172	0.197928	-0.677905	0.159799	-1.52385	0.304821	-0.150034	0.583559
E9Q6C8	Xkr6	1.14982	0.0570071	2.12553	0.0159733	-0.665846	0.376036	0.309868	0.694981
E9Q6P5	Ttc7b	0.781979	0.00537944	0.719779	0.0394763	0.613221	0.0239727	0.55102	0.0999217
E9Q735	Ube4a	2.29756	0.0562738	1.4459	0.0391916	1.98808	0.0662058	1.13642	0.0276966
E9Q7X7	Nrxn2	1.7255	0.0273774	2.87338	0.00274154	1.24089	0.0409036	2.38877	0.0018257
E9Q8I9;E9Q8I9-2	Fry	2.43213	0.155021	1.94556	0.0416886	1.92421	0.235355	1.43763	0.0861645
E9Q912;E9Q912-2	Rap1gds1	0.50348	0.123616	0.606737	0.0729918	1.01454	0.0110999	1.11779	0.00687193
E9QAT4;E9QAT4-2	Sec16a	-0.461328	0.443859	0.34675	0.637844	-1.73013	0.0290291	-0.922049	0.236404
F6SEU4	Syngap1	0.449675	0.0798798	0.693053	0.0364903	0.198705	0.351909	0.442083	0.11583
F8VPU2	Farp1	1.49099	0.169328	0.877577	0.090274	0.977485	0.333344	0.364073	0.405579
G3X982	Aox3	0.413554	0.786921	-0.820531	0.149533	-0.188354	0.89957	-1.42244	0.0166067
G3X9C2	Nccrp1	-1.59764	0.605141	0.31174	0.706891	-3.02158	0.334699	-1.11221	0.0133864
G3X9K3	Arfgef1	1.38506	0.0774172	1.54429	0.114981	0.714728	0.104308	0.873955	0.221018
G3XA57;G3XA57-2	Rab11fip2	3.72937	0.0357829	3.38411	0.00992077	2.95755	0.0703603	2.61228	0.0249689
G5E829	Atp2b1	2.22614	0.0156252	2.86401	0.00514445	2.15392	0.00508044	2.79178	0.001118
G5E8K5;G5E8K5-2;G5E8K5-3	Ank3	2.0052	0.00391765	1.98896	0.002985	1.75848	0.000430407	1.74224	6.35782e-05
G5E8V9-2	Arfip1	0.733154	0.354208	0.589891	0.28467	0.315975	0.798513	0.172712	0.876049
O08529	Capn2	0.0682046	0.781291	0.0706879	0.713549	0.180108	0.556284	0.182591	0.491609
O08530	S1pr1	3.82038	0.00255458	4.20013	0.00197248	3.22624	0.00197149	3.60598	0.00151068
O08532;O08532-2;O08532-3;O08532-4;O08532-5	Cacna2d1	0.14595	0.420713	0.296019	0.0934618	0.313412	0.108569	0.463481	0.0191368
O08539	Bin1	2.89877	0.00455003	2.9166	0.00349078	2.72581	0.00049628	2.74364	0.000148502
O08547	Sec22b	1.56257	0.00792799	1.93051	0.0034725	1.11801	0.00313698	1.48594	0.00085748
O08553	Dpysl2	0.117809	0.244725	0.0596822	0.341954	0.19462	0.0870631	0.136493	0.0683531
O08576;O08576-2;O08576-3;O08576-4	Rundc3a	1.5719	0.305405	1.5273	0.329362	1.72806	0.18488	1.68346	0.209427
O08579	Emd	0.681733	0.603791	-0.000288328	0.999814	1.12229	0.228822	0.440271	0.570936
O08582	Gtpbp1	0.861648	0.274967	-0.265388	0.699538	0.58701	0.352027	-0.540026	0.345556
O08585	Clta	0.0332785	0.807908	0.403984	0.607759	0.547937	0.0157366	0.918642	0.275469
O08586	Pten	1.34418	0.326826	2.21355	0.0693975	1.26171	0.356063	2.13107	0.0784755
O08599	Stxbp1	0.91492	0.00850596	0.938447	0.00656775	0.781391	0.00177113	0.804918	0.000813752
O08599-2	Stxbp1	1.15387	0.0350175	0.547894	0.106974	1.09718	0.0320195	0.491205	0.092833
O08600	Endog	0.0263119	0.963642	0.0397479	0.948121	0.499061	0.355746	0.512497	0.375064
O08638;O08638-2	Myh11	1.1	0.105302	-0.502711	0.0388111	0.91746	0.15237	-0.685249	0.00818784
O08644	Ephb6	1.13409	0.214552	2.35713	0.0186831	-0.204814	0.828688	1.01822	0.250094
O08663	Metap2	-1.82586	0.412022	0.134414	0.644048	-1.4911	0.497076	0.46918	0.180282
O08688	Capn5	-0.121194	0.0152491	0.220876	0.184965	-0.0399214	0.662364	0.302149	0.130723
O08709	Prdx6	-0.162877	0.240467	-0.0946306	0.473451	-0.170094	0.0434292	-0.101848	0.171514
O08738	Casp6	1.54891	0.0710751	1.884	0.0750683	1.36016	0.00178479	1.69525	0.0278985
O08739	Ampd3	-0.0842403	0.831453	0.071689	0.889061	0.498284	0.0677825	0.654214	0.150019
O08747;O08747-2	Unc5c	2.68893	0.148878	3.11539	0.0826843	2.14767	0.221494	2.57413	0.12461
O08749	Dld	-0.117053	0.589276	-0.231143	0.243568	-0.0812155	0.598432	-0.195306	0.107855
O08756	Hsd17b10	0.541426	0.0783581	0.717355	0.0466895	0.424172	0.0876048	0.600101	0.0491567
O08759;O08759-2	Ube3a	0.0540549	0.827011	-0.25748	0.0777744	0.376933	0.235922	0.0653982	0.730732
O08784	Tcof1	-0.70539	0.506629	-1.04078	0.318065	-0.945694	0.390558	-1.28109	0.240033
O08788;O08788-2	Dctn1	-0.185131	0.174352	-0.13833	0.445255	-0.109435	0.391298	-0.0626338	0.723115
O08795;O08795-2	Prkcsh	-0.211392	0.347749	-0.239965	0.106937	0.205915	0.42565	0.177343	0.347907
O08807	Prdx4	-1.7451	0.466657	-3.66816	0.0452601	-0.233153	0.926415	-2.15622	0.247269
O08810	Eftud2	1.13733	0.506274	-0.163049	0.212639	1.16827	0.495691	-0.132105	0.338366
O08848	RO60	-0.531757	0.465775	-0.278155	0.305906	-0.447224	0.549073	-0.193622	0.550698
O08852	Pkd1	-2.61897	0.3322	-1.50457	0.0549538	-2.40483	0.362661	-1.29043	0.031189
O08914	Faah	0.317037	0.429337	0.858395	0.0250207	0.164557	0.632989	0.705915	0.0166288
O08915	Aip	-0.505175	0.26275	-0.0306349	0.892657	-0.741111	0.238411	-0.266571	0.565382
O08917	Flot1	2.12134	0.00518662	2.21883	0.00381725	1.87619	0.00116463	1.97367	0.000601797
O08919	Numbl	3.16645	0.00280157	3.75808	0.00147069	2.86388	0.000371434	3.45551	0.000177444
O08989	Mras	0.471497	0.508379	0.525643	0.587512	-0.325588	0.649992	-0.271441	0.778772
O08992	Sdcbp	3.42838	0.00819113	2.91263	0.0198462	3.51951	0.00124456	3.00375	0.0051959
O08997	Atox1	-0.0915464	0.692799	-0.131011	0.345925	0.0839059	0.803362	0.0444412	0.873048
O09005	Degs1	1.33828	0.0215735	0.708887	0.119887	0.7374	0.169694	0.108013	0.816434
O09061	Psmb1	-1.4417	0.12463	-0.567603	0.0564979	-1.05115	0.221295	-0.177059	0.274768
O09106;P70288	Hdac1;Hdac2	-0.318412	0.398065	-0.369787	0.255267	-0.237996	0.399748	-0.289371	0.159407
O09111	Ndufb11	0.60339	0.454507	1.13647	0.184254	0.0114613	0.985254	0.544545	0.383959
O09114;O09114-2	Ptgds	-0.554519	0.224872	0.123456	0.854025	-1.30803	0.132538	-0.630051	0.501246
O09117;O09117-2	Sypl1	1.84519	0.0103319	1.66054	0.00792239	1.65563	0.0141444	1.47097	0.0111232
O09126	Sema4d	3.45859	0.0122908	2.50205	0.0240716	3.26562	0.00244633	2.30908	0.00169431
O09131	Gsto1	-0.203521	0.382061	0.760333	0.561199	-0.00621796	0.980456	0.957637	0.472017
O09167	Rpl21	0.301336	0.518559	0.288191	0.60848	0.521495	0.278718	0.508349	0.376407
O09172	Gclm	0.701508	0.0500542	1.38254	0.156942	0.460056	0.175639	1.14109	0.228771
O35075	Vps26c	2.06794	0.00353885	0.574171	0.269343	1.82816	0.00385701	0.33439	0.475127
O35083	Agpat1	1.20462	0.0220091	1.5386	0.00362661	0.689173	0.0842342	1.02315	0.00836914
O35098;O35098-2	Dpysl4	-0.130557	0.627481	0.324795	0.11911	-0.150461	0.594468	0.304891	0.168195
O35099	Map3k5	0.143225	0.688315	1.31146	0.0808829	-0.196868	0.64469	0.97137	0.183133
O35114	Scarb2	0.287374	0.66969	1.8703	0.064135	-0.337559	0.787743	1.24537	0.37058
O35127	Grcc10	-0.0286217	0.964929	0.206107	0.786314	-0.233944	0.629134	0.00078551	0.998977
O35129	Phb2	-0.450401	0.243118	0.0216713	0.925405	-0.563483	0.103428	-0.091411	0.427774
O35136	Ncam2	2.07989	0.00891677	2.41309	0.00500751	2.03142	0.00147531	2.36462	0.000711856
O35143	Atp5if1	-0.327494	0.750066	0.234829	0.869097	-0.304704	0.635929	0.257619	0.827108
O35215	Ddt	0.413677	0.133662	0.0402972	0.844165	0.554902	0.0305608	0.181522	0.236807
O35226;O35226-2	Psmd4	-0.327527	0.231081	-0.286059	0.267367	-0.237585	0.222677	-0.196117	0.262189
O35239	Ptpn9	0.559604	0.113315	0.459459	0.217651	0.522195	0.0254274	0.42205	0.116721
O35250;O35250-2	Exoc7	0.407152	0.246995	0.974513	0.0745336	0.0980062	0.693434	0.665367	0.136771
O35286	Dhx15	-0.982427	0.376265	-0.680496	0.534455	-0.0789919	0.73319	0.222939	0.462845
O35295	Purb	0.683405	0.111818	0.357771	0.450742	0.584396	0.172333	0.258762	0.589026
O35304	Slc18a3	-0.292147	0.765387	-0.502123	0.407427	-0.212536	0.807216	-0.422511	0.294937
O35316	Slc6a6	2.34855	0.00823304	2.27109	0.0045709	2.08628	0.0175144	2.00882	0.0118214
O35344	Kpna3	1.11318	0.0349632	1.6904	0.0940177	1.25266	0.00377736	1.82988	0.0632245
O35350	Capn1	-1.07621	0.654453	-0.353474	0.592945	-1.26906	0.598546	-0.546331	0.403405
O35375;O35375-2;O35375-3;O35375-4;O35375-5;O35375-6	Nrp2	2.84413	0.0247221	2.19114	0.025138	2.17463	0.0397102	1.52164	0.0406381
O35379	Abcc1	0.623266	0.40309	1.57598	0.0770318	-0.0111345	0.98516	0.941583	0.16852
O35381;Q64G17	Anp32a;Anp32c	1.53653	0.0498405	1.06671	0.177848	1.26812	0.105935	0.798297	0.318901
O35382	Exoc4	1.20151	0.00733926	1.47511	0.00655612	0.941747	0.0202578	1.21534	0.014702
O35393	Efnb3	2.95102	0.00598953	2.82918	0.0150084	2.0801	0.00418126	1.95826	0.0229006
O35400;O35400-2	Sult2b1	-0.845936	0.49632	0.870653	0.0695372	-2.28349	0.140355	-0.566905	0.416572
O35405	Pld3	-0.0312894	0.855105	0.0121473	0.938573	-0.0378036	0.722249	0.00563304	0.945217
O35409	Folh1	1.29022	0.0509725	0.826099	0.12383	1.29544	0.0496722	0.831318	0.120419
O35449	Prrt1	2.68484	0.0028233	3.15975	0.000474544	2.27109	0.00679245	2.746	0.0013334
O35454	Clcn6	3.2604	0.000459933	2.86032	0.00417431	2.61546	0.00381947	2.21537	0.018103
O35495;O35495-2	Cdk14	2.04703	0.0187103	2.41191	0.0175075	1.75724	0.00409509	2.12212	0.00776192
O35526	Stx1a	2.41013	0.00533145	3.14268	0.00192862	1.9916	0.000750404	2.72416	0.000187334
O35551;O35551-2;O35551-3;O35551-5;O35551-6	Rabep1	2.68894	0.126406	3.35238	0.0844094	0.014754	0.94648	0.678193	0.244581
O35593	Psmd14	-0.561892	0.139391	-0.213844	0.370751	-0.484164	0.194696	-0.136115	0.570973
O35598	Adam10	1.36429	0.186773	1.76229	0.24256	1.45872	0.145199	1.85671	0.212746
O35604	Npc1	0.281041	0.671719	-0.468654	0.260114	0.0961771	0.880953	-0.653518	0.12268
O35607	Bmpr2	2.47045	0.00777013	3.27975	0.00556141	1.68393	0.00425042	2.49323	0.00496716
O35609	Scamp3	3.07504	0.0295405	2.6614	0.00308889	2.67446	0.0377393	2.26083	0.00126073
O35621	Pmm1	-0.519876	0.712997	-1.88927	0.0633908	0.254012	0.841022	-1.11538	0.0789986
O35633;O35633-2	Slc32a1	2.0381	0.00798704	1.80735	0.010754	1.97045	0.00267497	1.73971	0.0032685
O35639	Anxa3	-0.484578	0.225711	-0.0546503	0.912049	-0.32681	0.207434	0.103118	0.802291
O35640	Anxa8	-1.24242	0.518826	0.0567665	0.825464	-1.63681	0.403411	-0.337621	0.169169
O35643	Ap1b1	0.279875	0.0217626	0.257582	0.0217996	0.401931	0.00688646	0.379638	0.00638322
O35658	C1qbp	0.816167	0.187385	0.623247	0.170713	0.692395	0.26761	0.499475	0.286501
O35668;O35668-2	Hap1	0.23116	0.722781	0.558938	0.175564	-0.796449	0.227319	-0.468671	0.126771
O35678	Mgll	0.363513	0.114789	0.665869	0.0126779	0.41843	0.0803581	0.720786	0.00936027
O35681	Syt3	4.16162	0.0174567	2.76572	0.065285	3.814	0.0204149	2.41809	0.0840937
O35682	Myadm	4.40292	0.00730088	5.41098	0.0233736	3.73446	0.00789185	4.74251	0.0308808
O35683	Ndufa1	0.851235	0.0217209	1.16663	0.0115137	0.74289	0.0121491	1.05828	0.00740799
O35685	Nudc	1.23363	0.0414744	1.22229	0.0310768	1.06346	0.00501033	1.05212	5.02552e-05
O35710;O35710-2	Noct	0.493037	0.321857	-0.175036	0.69229	-0.321525	0.683466	-0.989598	0.240171
O35737	Hnrnph1	-0.828559	0.0218372	-0.518383	0.0141505	-0.598826	0.052601	-0.288651	0.0586967
O35841	Api5	-0.0693623	0.935756	0.981438	0.295215	0.720327	0.158638	1.77113	0.0146245
O35857	Timm44	0.462572	0.450667	0.406736	0.510042	0.434779	0.181829	0.378942	0.258094
O35864	Cops5	0.241042	0.233312	0.455998	0.0476396	0.0374893	0.770555	0.252446	0.0736304
O35874	Slc1a4	2.91781	0.00549687	2.75075	0.00501627	2.54048	0.00732189	2.37341	0.00663443
O35887	Calu	0.232421	0.77388	0.14454	0.648116	0.0201963	0.979903	-0.0676851	0.825124
O35900	Lsm2	-0.041412	0.962257	0.169801	0.865705	0.0509205	0.94617	0.262134	0.771732
O35927	Ctnnd2	3.47164	0.00437928	3.94472	0.00204755	3.10662	0.000409389	3.5797	3.37053e-05
O35945	Aldh1a7	0.0598354	0.973063	-1.67988	0.374759	-0.845188	0.517783	-2.58491	0.101018
O35954	Pitpnm1	0.417178	0.155467	0.333709	0.0301753	0.300366	0.252344	0.216897	0.0244606
O35963	Rab33b	1.20651	0.0781115	2.31661	0.0320848	0.872609	0.0135607	1.98271	0.0218729
O54734	Ddost	0.0428871	0.948282	1.09808	0.00499954	-0.225171	0.731711	0.830025	0.00741728
O54774	Ap3d1	0.876536	0.0570524	0.898482	0.0127765	0.722931	0.0574756	0.744876	0.0015149
O54781	Srpk2	-0.374093	0.540916	0.921937	0.0921253	-0.249968	0.657912	1.04606	0.04646
O54829	Rgs7	2.47446	0.00523551	2.80792	0.00340857	1.97928	0.00050411	2.31274	0.000329126
O54833	Csnk2a2	0.409604	0.326693	1.13973	0.269946	0.162289	0.682847	0.892411	0.373604
O54865	Gucy1b1	-0.156797	0.0885723	-0.108119	0.134652	0.16554	0.0155155	0.214218	3.66987e-05
O54890	Itgb3	1.52716	0.177429	1.16181	0.214905	1.62045	0.199702	1.2551	0.248548
O54901	Cd200	2.31897	0.0106538	2.72552	0.00619928	2.02593	0.00102099	2.43248	0.000576931
O54916;O54916-3;O54916-4	Reps1	1.63163	0.0043858	0.536892	0.0632522	1.46796	0.0031557	0.373228	0.0526218
O54931;O54931-2;O54931-3;O54931-4;O54931-5	Akap2	-0.387338	0.147381	0.665508	0.595414	-0.292061	0.269251	0.760785	0.546904
O54940	Bnip2	0.697933	0.271149	1.97109	0.0239055	0.134051	0.524498	1.4072	0.00288533
O54946	Dnajb6	0.762784	0.320636	1.45563	0.0653391	-0.0958532	0.897816	0.596989	0.382646
O54950	Prkag1	-0.186669	0.795993	-0.583421	0.395198	0.00224908	0.996162	-0.394503	0.305174
O54962	Banf1	-1.00642	0.49658	0.212057	0.602867	-2.22545	0.16967	-1.00697	0.0313563
O54983	Crym	-0.197298	0.309225	-0.0555598	0.733822	-0.286469	0.0811175	-0.14473	0.215864
O54984	Get3	-0.136477	0.596525	0.0676905	0.711808	-0.000190099	0.999503	0.203978	0.433494
O54988;O54988-2	Slk	1.6852	0.298519	3.00562	0.117913	1.37806	0.385775	2.69847	0.150033
O54990;O54990-2;O54990-3;O54990-4;O54990-5;O54990-6	Prom1	1.83365	0.163397	1.2002	0.298505	2.25201	0.0101327	1.61856	0.0063104
O54991	Cntnap1	2.0938	0.00244105	1.67558	0.00186684	1.91193	0.00252316	1.4937	0.00157999
O55013	Trappc3	0.691856	0.0922125	0.941635	0.0648678	0.682856	0.00983777	0.932635	0.0200891
O55017;O55017-2	Cacna1b	3.13813	0.0748987	2.45226	0.0461543	2.85028	0.0836852	2.16441	0.0450449
O55022	Pgrmc1	1.20515	0.00812398	1.28143	0.00634245	0.763713	0.0028822	0.839991	0.00174835
O55023	Impa1	-0.154206	0.276301	0.0138289	0.893553	-0.0615171	0.607259	0.106518	0.260814
O55026	Entpd2	1.62957	0.0091988	1.27609	0.0192042	1.55199	0.00345118	1.19851	0.00726829
O55029	Copb2	-0.623026	0.0878521	-0.118957	0.646476	-0.769826	0.0489224	-0.265758	0.326591
O55033	Nck2	3.63066	0.00910014	4.77685	0.00277989	3.30738	0.00202149	4.45357	0.000342258
O55042;O55042-2	Snca	3.05017	0.0232706	3.37269	0.0110906	2.84781	0.00700862	3.17033	0.00128027
O55074;Q7TN79	Akap7	2.08576	0.121547	1.67165	0.141676	1.55562	0.0484582	1.14151	0.000451788
O55091	Impact	0.550744	0.0934994	0.376898	0.157583	0.47355	0.134106	0.299704	0.242364
O55100;O55100-2	Syngr1	2.3391	0.013812	2.75974	0.00651855	1.96922	0.00496604	2.38986	0.00144041
O55106	Strn	0.479346	0.334495	0.440896	0.365671	0.3285	0.219401	0.29005	0.251521
O55125	Nipsnap1	0.00567945	0.955619	-0.254332	0.00403363	-0.0313663	0.827828	-0.291377	0.0492318
O55126	Nipsnap2	-0.439873	0.253558	-0.308566	0.0789307	-0.343901	0.427527	-0.212593	0.435507
O55131	Septin7	2.62097	0.00916791	2.87931	0.00600951	2.32116	0.00110293	2.5795	0.000478618
O55135	Eif6	-1.95256	0.394988	-0.56786	0.460661	-2.01822	0.393672	-0.633515	0.503734
O55142	Rpl35a	0.956932	0.276802	0.711025	0.311755	1.00324	0.354262	0.757338	0.421874
O55143	Atp2a2	0.621358	0.0284723	0.872037	0.00226526	0.574088	0.0383741	0.824768	0.00323458
O55234	Psmb5	-0.782111	0.284897	-0.095602	0.0584159	-0.836346	0.259149	-0.149837	0.0887138
O70133;O70133-2	Dhx9	0.29228	0.172947	0.373924	0.00296544	0.448036	0.0696027	0.52968	0.0019397
O70161;O70161-3	Pip5k1c	3.02662	0.00509982	3.31127	0.00317548	2.6298	0.000656715	2.91445	0.000219631
O70161-2	Pip5k1c	-0.0529598	0.949677	0.934783	0.326242	0.149698	0.715919	1.13744	0.0742146
O70166	Stmn3	3.24024	0.000979963	3.17065	0.000944434	2.58825	0.00136739	2.51865	0.00129439
O70172	Pip4k2a	0.758826	0.0230715	0.528566	0.0484514	0.687515	0.0139547	0.457256	0.0264483
O70174	Chrna4	2.33847	0.099762	2.34026	0.05029	2.69917	0.0283109	2.70097	0.00244852
O70194	Eif3d	-0.395156	0.246643	-0.234348	0.500172	-0.506878	0.146362	-0.34607	0.323481
O70228	Atp9a	1.96664	0.014812	2.27063	0.00603887	1.62125	0.0119748	1.92525	0.00307475
O70251	Eef1b	-0.386043	0.265806	-0.115521	0.512016	-0.0940285	0.809833	0.176493	0.542433
O70252	Hmox2	1.73357	0.0640283	1.55328	0.0242119	1.64836	0.0520364	1.46807	0.00808327
O70274;Q63739	Ptp4a1;Ptp4a2	0.996983	0.401934	1.26845	0.396205	2.15874	3.84528e-05	2.4302	0.0406771
O70293;O70293-2	Grk6	0.0717681	0.924998	1.51916	0.243274	0.650094	0.151094	2.09749	0.0859879
O70305;O70305-2;O70305-3	Atxn2	1.18233	0.067258	0.717459	0.257418	0.901262	0.0945248	0.436388	0.424522
O70310	Nmt1	0.399377	0.474625	0.462239	0.337816	0.0855551	0.857496	0.148417	0.694554
O70311	Nmt2	1.83545	0.0371288	1.95874	0.0756605	1.66159	0.0488479	1.78487	0.0948575
O70318	Epb41l2	0.179099	0.331962	-0.0111961	0.849409	-0.0173009	0.935264	-0.207596	0.18385
O70325;O70325-2;O70325-3	Gpx4	0.0244427	0.91979	-0.173982	0.401344	0.401751	0.112051	0.203327	0.238133
O70370	Ctss	0.734805	0.321332	1.80092	0.0247745	0.568385	0.281793	1.6345	0.00192346
O70400	Pdlim1	1.48966	0.00763577	2.10127	0.00366348	0.983425	0.0246299	1.59503	0.00825178
O70401	Tspan6	3.23409	9.57366e-05	3.847	0.00104655	1.75458	0.170242	2.36749	0.103167
O70435	Psma3	-1.41835	0.185282	-0.604286	0.0369715	-1.32364	0.204638	-0.509579	0.0146145
O70439	Stx7	4.28475	0.0139256	3.46627	0.00304442	3.73263	0.0158396	2.91415	0.00081149
O70443	Gnaz	0.884483	0.022536	0.918273	0.0359992	0.766055	0.00224523	0.799845	0.0158205
O70456	Sfn	-1.92958	0.442523	0.0242246	0.965239	-2.0968	0.404759	-0.14299	0.772473
O70475	Ugdh	-2.04024	0.252515	0.752537	0.357486	-2.28824	0.207191	0.504534	0.518536
O70481	Ubr1	1.02368	0.0393906	1.71212	0.00189789	1.05726	0.0529875	1.7457	0.00444371
O70492	Snx3	1.95309	0.0987446	1.94242	0.0307736	1.73165	0.0789315	1.72098	0.00268721
O70493	Snx12	0.459124	0.310227	0.506097	0.188024	-0.0841122	0.909881	-0.0371396	0.957675
O70503	Hsd17b12	0.623761	0.0565199	1.00035	0.0108317	0.479119	0.059515	0.855708	0.00695938
O70507	Hcn4	2.06497	0.162072	2.31003	0.0788587	1.82869	0.182748	2.07376	0.0819389
O70566	Diaph2	0.467913	0.644501	1.21925	0.173313	0.908752	0.301244	1.66009	0.0289727
O70585;O70585-2	Dtnb	3.65455	0.051715	3.20432	0.0671166	3.28518	0.0127236	2.83495	0.0139574
O70589;O70589-3;O70589-4;O70589-5	Cask	0.556919	0.135117	0.720295	0.0699575	0.609823	0.000923239	0.773199	6.0761e-05
O88307	Sorl1	0.435154	0.277346	1.02897	0.168193	0.737112	0.091286	1.33093	0.09264
O88322	Nid2	-2.30328	0.116381	-0.912196	0.0462801	-2.62993	0.178911	-1.23884	0.351698
O88342	Wdr1	-0.0157324	0.812938	0.0686474	0.365521	-0.117111	0.121678	-0.0327307	0.641238
O88343	Slc4a4	1.80036	0.00410591	1.92369	0.0024215	1.69759	0.00758511	1.82092	0.00475347
O88384	Vti1b	1.24447	0.183123	0.382751	0.402156	0.729937	0.375176	-0.131783	0.703903
O88441	Mtx2	0.465793	0.0934564	-0.052282	0.690578	0.408701	0.139913	-0.109373	0.474151
O88444	Adcy1	2.95174	0.051456	4.596	0.0312942	2.68898	0.0333568	4.33324	0.0254836
O88447	Klc1	0.988713	0.0574645	0.525222	0.249704	0.856828	0.0609289	0.393337	0.323297
O88448	Klc2	0.331181	0.110163	0.192561	0.0854014	0.267419	0.15873	0.128799	0.138982
O88455	Dhcr7	0.834137	0.485449	2.38456	0.00464962	0.606908	0.595959	2.15733	0.00274745
O88456	Capns1	-0.660038	0.712507	0.244028	0.724019	-0.550194	0.748585	0.353871	0.472877
O88485;O88485-2	Dync1i1	0.40065	0.256057	0.287401	0.225188	0.211897	0.577295	0.0986478	0.729983
O88487	Dync1i2	0.0256844	0.849939	0.403536	0.144284	-0.741457	0.0599128	-0.363605	0.343276
O88507	Cntfr	1.74314	0.0860974	1.08462	0.124688	1.61485	0.0985508	0.956322	0.149564
O88513	Gmnn	1.98043	0.00558924	2.26221	0.0237087	1.65813	0.00292451	1.93991	0.0288519
O88531	Ppt1	0.199606	0.767867	-0.820784	0.0568326	0.357087	0.586875	-0.663302	0.0571237
O88532	Zfr	-0.336093	0.26501	0.311223	0.694926	0.121291	0.664776	0.768607	0.356518
O88533	Ddc	-0.322625	0.716846	0.614539	0.295009	-0.0711819	0.933792	0.865982	0.139993
O88543	Cops3	2.17153	0.0628615	1.91421	0.016014	2.00778	0.0683539	1.75045	0.0123018
O88544	Cops4	0.0179418	0.9041	-0.143308	0.296069	0.00899792	0.947028	-0.152252	0.218237
O88545	Cops6	-0.33687	0.236569	-0.176689	0.431286	-0.372936	0.128086	-0.212755	0.208244
O88569	Hnrnpa2b1	-0.448683	0.0770115	-0.254981	0.0412039	-0.597151	0.0705423	-0.403448	0.0835086
O88587;O88587-2	Comt	0.900061	0.354251	0.853741	0.294257	0.695352	0.310097	0.649031	0.134778
O88602	Cacng2	6.0726	0.00250566	6.01094	0.00133856	6.01325	0.00214724	5.95159	0.00104669
O88643	Pak1	1.53307	0.0156129	1.66233	0.0134586	1.21113	0.00274045	1.34039	0.00317395
O88685	Psmc3	0.326389	0.159995	0.597591	0.0599837	0.405432	1.5542e-05	0.676634	0.0066781
O88689-3	Pcdha4	2.65379	0.00463302	3.91915	0.0342756	1.9448	0.00634141	3.21016	0.0567512
O88703	Hcn2	2.82259	0.00491917	2.74156	0.00745437	2.70154	0.000657889	2.62051	0.00182206
O88704	Hcn1	2.59233	0.0762595	3.20953	0.0221042	2.09583	0.113976	2.71304	0.0296198
O88705	Hcn3	3.44296	0.0163778	3.60616	0.00375168	3.18914	0.0155332	3.35235	0.0021732
O88712;O88712-2	Ctbp1	0.229787	0.00353133	0.129863	0.371185	0.200552	0.10631	0.100629	0.555888
O88737	Bsn	0.907447	0.0292245	1.10032	0.0147455	0.968456	0.00109682	1.16133	0.000347697
O88738;O88738-2;O88738-3	Birc6	-0.275563	0.660032	0.960213	0.204238	-0.865992	0.229773	0.369784	0.606151
O88741	Gdap1	1.44104	0.0132363	1.41414	0.010748	1.09694	0.0115518	1.07003	0.00717732
O88746	Tom1	-0.368081	0.732397	-0.0519403	0.950182	0.142717	0.888846	0.458858	0.559785
O88844	Idh1	-0.634555	0.114607	-0.342788	0.00233649	-0.476945	0.226992	-0.185179	0.202799
O88845	Akap10	3.00837	0.0941259	1.49686	0.138575	2.82069	0.0932379	1.30919	0.112062
O88848;O88848-2	Arl6	0.149319	0.749466	-0.272428	0.754008	-0.044699	0.902902	-0.466446	0.575438
O88851	Rbbp9	0.524219	0.0364688	0.584029	0.0696911	0.0962454	0.47367	0.156055	0.491088
O88910	Mpp3	2.24371	0.0228741	3.59356	0.004757	1.66093	0.000428935	3.01077	8.86384e-05
O88935	Syn1	1.75497	0.0141506	1.8746	0.00985936	1.58164	0.00345362	1.70128	0.00170097
O88935-1	Syn1	1.68538	0.111553	0.690619	0.569016	1.66394	0.0566621	0.669181	0.529859
O88952	Lin7c	0.287811	0.453496	0.279068	0.262966	0.415201	0.280056	0.406457	0.0995747
O88958	Gnpda1	-0.875938	0.22196	0.559279	0.0808828	-0.759898	0.282987	0.675319	0.0588987
O88967	Yme1l1	0.654248	0.460877	1.28367	0.138001	-1.7579	0.0497456	-1.12848	0.0810198
O88974;O88974-4	Setdb1	2.80294	0.166993	2.70835	0.208406	0.450254	0.781279	0.355669	0.84217
O88998	Olfm1	0.273697	0.0961469	0.413874	0.0706087	0.311998	0.122416	0.452176	0.0815293
O89026	Robo1	4.33627	0.00154517	4.73199	0.00211045	3.63222	0.000882244	4.02794	0.00177312
O89032;O89032-2	Sh3pxd2a	3.25341	0.00799215	3.09851	0.0362051	2.60174	0.00412542	2.44685	0.0479214
O89051	Itm2b	1.96162	0.0440177	2.19576	0.0310971	1.47859	0.079753	1.71272	0.0532182
O89053	Coro1a	-0.110921	0.533109	0.0237776	0.919108	-0.0287317	0.855194	0.105967	0.638723
O89112	Lancl1	0.902243	0.0503317	1.42371	0.0173996	0.886281	0.0123593	1.40775	0.00576301
P00158	Mt-Cyb	1.4594	0.0163377	1.06407	0.0230252	1.00577	0.0533898	0.610439	0.113505
P00397	Mtco1	3.92618	0.0580179	2.99819	0.0764408	3.30562	0.0926888	2.37763	0.135922
P00405	Mtco2	0.857718	0.0309001	0.852333	0.0202714	0.779573	0.0169101	0.774188	0.0065831
P00416	mt-Co3	0.862619	0.0815533	0.668309	0.0184187	0.520665	0.201483	0.326354	0.0205381
P00493	Hprt1	-0.363593	0.0239588	-0.313159	0.0287367	-0.222586	0.121112	-0.172152	0.177481
P00520;P00520-2;P00520-3;P00520-4	Abl1	0.155154	0.835902	0.756979	0.286357	-0.742526	0.295553	-0.140701	0.799184
P00920	Ca2	0.446798	0.0798645	0.182607	0.30207	0.238548	0.231557	-0.025643	0.848403
P01027	C3	-0.308765	0.307332	-0.398071	0.106313	-0.305969	0.314181	-0.395275	0.111539
P01642	Gm10881	1.25843	0.207768	0.96614	0.236069	1.98345	0.0429681	1.69116	0.0255831
P01756;P01757;P06330		1.41245	0.0629943	1.33027	0.0172786	1.19948	0.0724358	1.1173	0.00871486
P01831	Thy1	0.518695	0.0354028	0.695709	0.0183811	0.590258	0.0029851	0.767272	0.00274612
P01837	Igkc	0.678937	0.670033	-0.435029	0.77553	1.66437	0.230761	0.550404	0.646403
P01863;P01865	Igh-1a;Ighg	0.0919406	0.902898	-1.21354	0.00838582	0.60014	0.475095	-0.705343	0.135569
P01867;P01867-2	Ighg2b	-0.308447	0.260903	-1.43218	0.00208133	0.286927	0.607365	-0.83681	0.16999
P01868;P01869	Ighg1	0.380388	0.876129	0.875216	0.609688	1.31338	0.51589	1.8082	0.0908478
P01887	B2m	0.320544	0.372197	-0.293963	0.269098	-0.0712566	0.919276	-0.685763	0.332078
P01942	Hba	-0.312905	0.345264	-0.416622	0.172189	-0.206237	0.386624	-0.309954	0.107278
P02088	Hbb-b1	-0.179147	0.582372	-0.208877	0.491319	-0.337999	0.0889685	-0.367729	0.0182855
P02089	Hbb-b2	0.693501	0.815952	4.94206	0.0506814	-1.90773	0.581246	2.34084	0.376469
P02301;P68433;P84228;P84244	H3-3a;H3-5;H3c1;H3c2	-0.540483	0.341317	-0.537695	0.30516	-0.250062	0.594235	-0.247274	0.552343
P02463	Col4a1	0.112753	0.84332	-0.379449	0.221083	1.22488	0.163863	0.732677	0.252136
P02468	Lamc1	-0.0373551	0.912214	-0.792821	0.0177186	0.255527	0.463561	-0.499939	0.0666007
P02535;P02535-2;P02535-3	Krt10	-2.47339	0.284405	-1.66458	0.276796	-2.08522	0.288314	-1.27641	0.187162
P03888	Mtnd1	1.44563	0.0214349	1.31418	0.0095058	1.11685	0.0230477	0.985396	0.00239625
P03911	Mtnd4	1.17329	0.0430476	1.61571	0.0529878	0.419801	0.57784	0.862227	0.352684
P03921	Mtnd5	1.48524	0.0696374	1.07406	0.00632932	1.32822	0.0982166	0.917038	0.0200936
P03930	Mtatp8	1.67375	0.00754679	1.62489	0.00792087	1.32389	0.00726057	1.27503	0.0075575
P03987;P03987-2		0.567861	0.650497	1.00094	0.445727	-0.51581	0.679933	-0.082729	0.947677
P03995;P03995-2	Gfap	-0.344055	0.191864	-0.61576	0.0123873	-0.402825	0.101851	-0.67453	0.00181315
P04104	Krt1	-2.77417	0.291825	-1.47862	0.0941548	-2.47013	0.32712	-1.17458	0.0316711
P04370-2	Mbp	-1.24598	0.117988	-0.260902	0.675405	-0.749603	0.153608	0.235479	0.538743
P04370-4	Mbp	-0.791727	0.0908296	-0.736775	0.0546149	-0.550592	0.155644	-0.49564	0.0840298
P04627	Araf	2.35159	0.0087524	3.31791	0.00170338	1.95166	0.00555312	2.91798	0.000543
P04925	Prnp	0.551803	0.0189656	0.755768	0.0560904	0.665406	0.0037622	0.86937	0.0313471
P05063	Aldoc	-0.135469	0.324183	-0.306927	0.106802	-0.0257943	0.810666	-0.197252	0.210492
P05064	Aldoa	-0.40066	0.0445741	-0.272687	0.101393	-0.221898	0.0697427	-0.0939242	0.272918
P05132;P05132-2	Prkaca	0.606898	0.0852976	0.759309	0.0582433	0.428404	0.00814972	0.580816	0.0146706
P05201	Got1	-0.234285	0.0256607	-0.327746	0.0205971	-0.176659	0.0789889	-0.27012	0.0457882
P05202	Got2	-0.220153	0.319803	-0.367974	0.118118	-0.119074	0.262112	-0.266895	0.0199689
P05214	Tuba3a	-0.146565	0.440591	0.0533905	0.792678	-0.0125879	0.921242	0.187368	0.266136
P05480;P05480-1	Src	1.73067	0.00941079	1.89059	0.00585716	1.40927	0.00515785	1.56919	0.00238592
P05532;P05532-2	Kit	2.08618	0.00670229	3.03834	0.0114111	1.52532	0.0128429	2.47748	0.0197339
P06151	Ldha	0.137251	0.272485	0.367682	0.046124	-0.067241	0.251629	0.16319	0.131545
P06537;P06537-2;P06537-3;P06537-4;P06537-5	Nr3c1	-0.248465	0.728574	0.688774	0.289758	-0.594058	0.257369	0.343181	0.282002
P06745	Gpi	0.993239	0.00961199	1.06955	0.00685757	0.850674	0.00497737	0.92699	0.0030892
P06801	Me1	-0.623152	0.458489	-0.160467	0.570769	-0.44102	0.599478	0.0216646	0.945677
P06837	Gap43	1.62117	0.191132	2.20014	0.0780333	-0.0129805	0.986154	0.565992	0.36169
P06880	Gh1	5.07477	0.00220396	5.96873	0.0102105	1.39044	0.0457621	2.28439	0.12668
P07309	Ttr	0.610885	0.459041	1.13001	0.398576	0.353109	0.646823	0.872229	0.499792
P07310	Ckm	-1.84775	0.226996	-0.916663	0.47637	-1.92075	0.205797	-0.98967	0.435199
P07356	Anxa2	-2.47411	0.289693	-1.06747	0.193363	-2.48116	0.273964	-1.07451	0.0675039
P07724	Alb	-0.420778	0.143128	-0.672036	0.0301999	0.172565	0.251393	-0.0786934	0.317773
P07758;Q00896	Serpina1a;Serpina1c	2.27726	0.0046596	2.77229	0.0127328	2.02577	0.000174811	2.52081	0.00891886
P07759	Serpina3k	2.42891	0.0592548	1.57378	0.00251276	1.68335	0.151732	0.828223	0.0558402
P07901	Hsp90aa1	-0.192659	0.108803	-0.125553	0.160813	-0.256847	0.0563305	-0.189741	0.0686625
P07934	Phkg1	0.655575	0.327232	1.07337	0.214111	-0.0457481	0.935733	0.372044	0.615371
P08003	Pdia4	0.129585	0.523163	0.252986	0.224058	0.0702883	0.727484	0.193689	0.339504
P08030	Aprt	-0.897883	0.527804	0.292322	0.793115	-1.08562	0.479533	0.104588	0.932337
P08074	Cbr2	-0.460214	0.513735	-0.091471	0.915749	-1.93326	0.0379208	-1.56452	0.123677
P08113	Hsp90b1	-0.304559	0.0781463	-0.10067	0.382596	-0.43665	0.022682	-0.232761	0.065032
P08122	Col4a2	-0.251611	0.600982	-0.665069	0.0203927	0.879318	0.32192	0.46586	0.521792
P08226	Apoe	0.104685	0.561633	0.12103	0.162262	-0.305887	0.250068	-0.289543	0.166354
P08228	Sod1	-0.192077	0.564176	-0.373128	0.251847	0.202331	0.265767	0.0212797	0.83028
P08249	Mdh2	-0.360421	0.166956	-0.37655	0.152628	0.0119273	0.853252	-0.00420189	0.947482
P08414	Camk4	0.944639	0.183446	0.501027	0.16474	1.31115	0.0667618	0.867537	0.00246055
P08551	Nefl	-0.223115	0.400859	-0.413453	0.165754	-0.137263	0.460744	-0.327601	0.138959
P08553	Nefm	0.219515	0.500281	-0.267173	0.36911	0.302956	0.200805	-0.183732	0.274308
P08752	Gnai2	0.772431	0.0179435	0.649581	0.0287897	0.831636	0.00133706	0.708787	0.00167186
P09055	Itgb1	2.10497	0.160447	1.08665	0.0418453	1.83968	0.195775	0.821351	0.017951
P09103	P4hb	-0.282357	0.0126637	-0.120823	0.251903	-0.0488936	0.59424	0.11264	0.343196
P09405	Ncl	-0.485981	0.172481	-0.555343	0.0728941	-0.541564	0.0925943	-0.610926	0.0210984
P09411	Pgk1	-0.622527	0.162868	-0.226848	0.0796636	-0.364031	0.3692	0.031648	0.708086
P09470	Ace	0.243873	0.303848	0.794788	0.182217	0.186069	0.861598	0.736984	0.538355
P09528	Fth1	0.295725	0.453562	-0.026871	0.896919	0.00602118	0.987433	-0.316574	0.188041
P09671	Sod2	-0.160318	0.170019	-0.313449	0.0392303	-0.175935	0.29895	-0.329066	0.0975797
P0C027;P0C028	Nudt10;Nudt11	0.404885	0.0823502	0.151449	0.424204	0.44967	0.0819446	0.196234	0.359832
P0C0S6;Q3THW5	H2az1;H2az2	-0.621293	0.226141	-0.239483	0.575597	-0.601336	0.257376	-0.219525	0.625985
P0C192	Lrrc4b	2.07565	0.0468365	1.862	0.0702869	1.88514	0.0504226	1.6715	0.0786237
P0C7L0;P0C7L0-2	Wipf3	1.93906	0.157759	0.858207	0.0183642	1.84717	0.170899	0.766315	0.0108081
P0C7M9	Clec2l	2.2387	0.0761703	1.80785	0.145631	2.78947	0.000459082	2.35863	0.00556696
P0DP26;P0DP27;P0DP28	Calm1;Calm2;Calm3	-1.08996	0.470466	0.370402	0.662063	-1.41382	0.392785	0.0465355	0.963769
P0DP60	Lynx1	-0.453403	0.475534	-0.741282	0.119471	-0.595987	0.425783	-0.883866	0.158847
P10107	Anxa1	-1.19465	0.581961	0.710741	0.712847	-3.13883	0.159604	-1.23344	0.483433
P10126	Eef1a1	-0.868352	0.330092	0.164326	0.211675	-0.932407	0.299728	0.100271	0.399724
P10493	Nid1	1.26368	0.362851	-0.46824	0.0386061	1.2802	0.364032	-0.451726	0.168268
P10518	Alad	-0.656223	0.287795	-0.335535	0.129108	-0.56483	0.353097	-0.244142	0.253103
P10605	Ctsb	-0.236902	0.336708	-0.195159	0.394502	0.116496	0.296548	0.158239	0.0706724
P10630;P10630-2	Eif4a2	-0.563192	0.115863	-0.187593	0.209727	-0.557811	0.121973	-0.182212	0.244729
P10637	Mapt	2.1889	0.0173541	2.4259	0.0103202	1.89904	0.000770442	2.13604	4.22983e-05
P10639	Txn	2.45677	0.021808	2.68038	0.0111671	2.09364	0.0037457	2.31724	0.000148767
P10649	Gstm1	0.0254224	0.712035	-0.155345	0.0266368	-0.0962556	0.181824	-0.277023	0.00202182
P10711;P10711-2	Tcea1	1.27626	0.133261	-0.527261	0.133511	0.999507	0.21883	-0.804013	0.0539953
P10852;P10852-2	Slc3a2	1.92178	0.00298902	2.499	0.0014799	1.68945	0.00305506	2.26667	0.00144514
P10853;P10854;Q64475;Q64478;Q64525;Q6ZWY9;Q8CGP1;Q8CGP2;Q8CGP2-2	H2bc12;H2bc14;H2bc3;H2bc4;H2bc7;H2bc9;Hist1h2bp;Hist2h2bb	-0.488371	0.329238	-0.255653	0.537653	-0.677425	0.220323	-0.444708	0.339536
P10922	H1-0	0.522299	0.374414	0.366333	0.512962	0.282445	0.614688	0.126478	0.814942
P11031	Sub1	-0.64285	0.0349719	-0.263295	0.531613	-0.666088	0.0328748	-0.286533	0.499826
P11103;P11103-2	Parp1	-1.33734	0.486248	-0.741515	0.621285	-1.641	0.428827	-1.04517	0.533619
P11352	Gpx1	0.43649	0.598879	-0.40695	0.554461	0.952651	0.152647	0.109211	0.753479
P11404	Fabp3	0.284657	0.340952	0.0732997	0.872614	-0.250524	0.316878	-0.461881	0.315872
P11438	Lamp1	0.0642004	0.875975	0.866958	0.0323724	0.035512	0.926707	0.83827	0.0233843
P11499	Hsp90ab1	-0.273914	0.143965	-0.0717182	0.358698	-0.329715	0.1001	-0.12752	0.172721
P11627	L1cam	0.0449079	0.666673	0.27286	0.126853	0.278222	0.0127929	0.506174	0.0144446
P11679	Krt8	-2.32217	0.354688	0.0165313	0.97519	-2.61163	0.304853	-0.272926	0.61551
P11798	Camk2a	0.169804	0.180351	0.51862	0.00990897	0.219466	0.178551	0.568282	0.0156066
P11881;P11881-2;P11881-3;P11881-4;P11881-5;P11881-6;P11881-7;P11881-8	Itpr1	0.819837	0.0072956	0.709329	0.325478	0.818815	0.00818039	0.708308	0.326991
P11983	Tcp1	-0.137633	0.487798	0.0224927	0.762982	-0.0965449	0.633238	0.0635808	0.500544
P12023;P12023-2;P12023-3	App	0.0844345	0.759277	0.887309	0.332468	-0.432145	0.155756	0.37073	0.668074
P12367	Prkar2a	2.26139	0.00289519	2.11997	0.00382193	1.83297	0.000266332	1.69155	0.000449851
P12382	Pfkl	0.152487	0.101766	0.214973	0.0871207	0.103979	0.31157	0.166465	0.20272
P12388	Serpinb2	-1.12211	0.619546	-0.0190398	0.975791	-2.50424	0.314405	-1.40117	0.17696
P12657	Chrm1	3.56986	0.00682295	3.59058	0.00144481	3.12152	0.00924358	3.14224	0.00153239
P12658	Calb1	0.021898	0.939304	-0.328426	0.206147	0.244245	0.441813	-0.106079	0.678393
P12787	Cox5a	-0.404187	0.0902673	-0.373739	0.0776706	-0.236749	0.128902	-0.206301	0.0747153
P12815	Pdcd6	-0.938264	0.590605	-0.340258	0.748106	-2.2822	0.369168	-1.68419	0.418341
P12849	Prkar1b	0.0881532	0.795601	1.15238	0.212983	-0.304407	0.709157	0.759816	0.505629
P12960	Cntn1	0.32283	0.0499705	0.253258	0.00725408	0.439332	0.0270479	0.36976	0.00784065
P12970	Rpl7a	-0.263025	0.507822	-0.00944392	0.967991	-0.373571	0.374567	-0.11999	0.643929
P13020-2	Gsn	-1.55967	0.311556	0.0678838	0.83786	-1.69529	0.271445	-0.0677338	0.775561
P13595	Ncam1	2.24871	0.0157295	3.01268	0.00295598	1.94588	0.00528327	2.70985	0.000102216
P13595-2	Ncam1	1.99048	0.0300761	2.43162	0.023024	1.27416	0.0055174	1.7153	0.0113446
P13707	Gpd1	-0.177072	0.14049	-0.232759	0.179456	0.0742277	0.517766	0.0185401	0.906921
P14094	Atp1b1	1.55002	0.00585104	1.59786	0.00422564	1.33956	0.00327412	1.3874	0.0018656
P14106	C1qb	1.60648	0.125798	1.2301	0.124401	1.86615	0.0899348	1.48977	0.0809752
P14115	Rpl27a	0.40143	0.479104	0.725839	0.103968	0.174945	0.766751	0.499354	0.277837
P14131	Rps16	-0.541063	0.230334	-0.0198383	0.893574	-0.375812	0.389333	0.145412	0.406948
P14148	Rpl7	0.158974	0.696551	0.0681973	0.821598	-0.035979	0.937043	-0.126755	0.732605
P14152	Mdh1	0.0935389	0.333596	0.168005	0.115279	0.226375	0.0296254	0.300841	0.0106912
P14206	Rpsa	-1.43047	0.213462	-0.260081	0.0615043	-1.36344	0.235522	-0.193047	0.320109
P14211	Calr	-0.449268	0.172413	-0.0533613	0.501331	-0.505962	0.130296	-0.110055	0.108175
P14231	Atp1b2	1.52433	0.00762882	1.39837	0.00733312	1.29137	0.0101883	1.16541	0.00968383
P14576	Srp54	-2.07319	0.0339305	-0.942899	0.102198	-1.5663	0.0673174	-0.436003	0.344632
P14602;P14602-2	Hspb1	-1.11492	0.736758	0.369908	0.794891	-3.46426	0.312364	-1.97943	0.144844
P14685	Psmd3	0.68776	0.0619975	1.17423	0.0155316	0.357147	0.157219	0.843614	0.0227105
P14733	Lmnb1	-0.42475	0.0492787	-0.367401	0.0843078	-0.530517	0.150978	-0.473168	0.194271
P14824	Anxa6	-0.0341218	0.688443	-0.09231	0.33475	0.0498117	0.4169	-0.00837644	0.899433
P14869	Rplp0	-0.373001	0.287672	-0.178368	0.449714	-0.44339	0.224409	-0.248757	0.320154
P14873	Map1b	0.214373	0.153744	0.242132	0.0192448	0.373208	0.082322	0.400967	0.0318402
P15105	Glul	-0.0876789	0.488006	-0.0828209	0.60589	0.190376	0.00819524	0.195234	0.126171
P15116	Cdh2	1.08089	0.0806501	1.38338	0.0254884	0.541467	0.186953	0.843953	0.0250929
P15209	Ntrk2	1.58214	0.0171358	2.28164	0.00499383	1.13095	0.00268365	1.83045	0.000541426
P15379;P15379-10;P15379-11;P15379-12;P15379-13;P15379-2;P15379-3;P15379-4;P15379-5;P15379-6;P15379-7;P15379-8;P15379-9	Cd44	0.941648	0.4641	1.36886	0.306781	1.94675	0.00543162	2.37396	0.00308234
P15388;P15388-3	Kcnc1	3.45728	0.010211	2.87966	0.0094205	3.04679	0.0111941	2.46917	0.00923625
P15508	Sptb	0.287808	0.235396	-0.00849787	0.962757	0.172045	0.461355	-0.124261	0.521727
P15532	Nme1	-0.970301	0.164346	-0.208865	0.181251	-0.782721	0.24276	-0.0212854	0.880641
P15864;P43277	H1-2;H1-3	-0.717762	0.360743	-0.425817	0.580143	-0.860749	0.268088	-0.568804	0.451454
P16045	Lgals1	2.0407	0.0623054	1.85093	0.159164	0.282922	0.887342	0.09316	0.965208
P16054	Prkce	1.07433	0.0077862	1.33714	0.0131738	0.82279	0.00121968	1.08561	0.0120626
P16110	Lgals3	-3.35835	0.193008	-0.521396	0.292472	-3.5778	0.170907	-0.740844	0.154731
P16125	Ldhb	-0.075189	0.624045	-0.117217	0.590297	0.0960185	0.435837	0.05399	0.779279
P16283	Slc4a3	3.87488	0.0158351	4.34486	0.00391409	3.3383	0.0165282	3.80828	0.00232516
P16330;P16330-2	Cnp	0.265457	0.207245	0.400456	0.132385	0.301853	0.13379	0.436853	0.0936365
P16332	Mmut	-0.395787	0.116451	-0.42249	0.0221131	-0.236345	0.273918	-0.263048	0.0507229
P16388	Kcna1	4.11291	0.0111233	4.20294	0.00199561	3.35394	0.0146624	3.44397	0.000978553
P16390	Kcna3	5.55198	0.0227973	5.76881	0.00616217	4.81832	0.0349564	5.03515	0.0096456
P16460	Ass1	0.446835	0.321099	-0.190768	0.399974	0.550606	0.21926	-0.0869967	0.632121
P16546	Sptan1	0.0210768	0.784375	-0.0118427	0.918087	-0.0754407	0.508107	-0.10836	0.456457
P16627	Hspa1l	-1.07898	0.429004	-0.499607	0.45309	-0.700012	0.578948	-0.120635	0.801953
P16858	Gapdh	-0.25097	0.211044	-0.0921427	0.563503	-0.09552	0.521722	0.0633068	0.587492
P17047;P17047-2;P17047-3	Lamp2	1.75128	0.0497904	1.17694	0.0684872	1.35506	0.0802155	0.780729	0.12895
P17156	Hspa2	-0.958447	0.205641	-0.262899	0.107321	-0.841	0.25913	-0.145451	0.388997
P17182	Eno1	-0.60781	0.177186	-0.179926	0.142934	-0.527574	0.222123	-0.0996901	0.23714
P17183	Eno2	-0.246317	0.00500471	-0.195595	0.0637064	-0.136428	0.136628	-0.0857061	0.425774
P17225	Ptbp1	0.722028	0.475196	1.07685	0.401886	1.63116	0.293102	1.98598	0.260428
P17426;P17426-2	Ap2a1	0.752174	0.00796647	0.860408	0.00235926	0.74656	0.00928982	0.854794	0.00294811
P17427	Ap2a2	0.703755	0.0106587	0.903812	0.00712785	0.635261	0.0137507	0.835318	0.00873696
P17439	Gba	-1.94833	0.41648	0.110125	0.810352	-1.86926	0.445881	0.189193	0.792232
P17563;Q63836	Selenbp1;Selenbp2	-0.0706778	0.814284	-0.358787	0.0453292	0.134288	0.669539	-0.153821	0.353464
P17665	Cox7c	0.542685	0.00722329	0.432194	0.0115147	0.381643	0.0548705	0.271151	0.114857
P17710;P17710-3;P17710-4	Hk1	-0.173402	0.276119	-0.185922	0.218153	-0.0468547	0.577088	-0.0593745	0.357275
P17742	Ppia	-0.455102	0.0515234	-0.239008	0.220153	-0.107257	0.489268	0.108836	0.479698
P17751;P17751-2	Tpi1	-0.361998	0.0591346	-0.326555	0.0455683	-0.210368	0.0929638	-0.174926	0.0325177
P17809	Slc2a1	0.751175	0.264408	0.30803	0.211234	0.777733	0.25003	0.334589	0.178529
P17879;Q61696	Hspa1a;Hspa1b	-1.55985	0.130081	-0.33945	0.61456	-1.75814	0.111216	-0.537736	0.471634
P17897	Lyz1	-1.0474	0.172084	0.619187	0.416569	-1.51038	0.0365035	0.156205	0.792589
P17918	Pcna	-1.27545	0.201564	-1.25821	0.0381205	-1.72264	0.218133	-1.7054	0.140637
P18052;P18052-2	Ptpra	0.310532	0.0718229	0.630823	0.0256328	0.0112969	0.938571	0.331587	0.154371
P18242	Ctsd	0.0847232	0.705525	-0.286587	0.244814	0.0508709	0.728019	-0.32044	0.0824038
P18572;P18572-2	Bsg	1.475	0.0102868	1.72205	0.00385913	1.15278	0.010327	1.39983	0.00236485
P18581;P18581-2	Slc7a2	2.27872	0.0164941	2.44752	0.0031628	1.92049	0.0201801	2.08929	0.00196732
P18653	Rps6ka1	0.287936	0.59193	0.244135	0.511802	0.229364	0.66314	0.185563	0.603931
P18760	Cfl1	-0.126933	0.196574	0.0493247	0.604551	0.0103111	0.920904	0.186569	0.142932
P18826;P18826-2	Phka1	0.768957	0.326483	0.247576	0.69642	-0.234053	0.77406	-0.755434	0.325579
P18872	Gnao1	0.214723	0.635657	0.726665	0.170791	0.433728	0.0647525	0.94567	0.0105288
P18872-2	Gnao1	0.550437	0.0429913	0.611027	0.0318831	0.585875	0.000344364	0.646465	0.000293761
P19001	Krt19	-0.7577	0.825844	-0.348869	0.919597	-5.27796	0.07691	-4.86913	0.0972193
P19096	Fasn	-0.11539	0.623977	-0.0918229	0.613826	0.0188783	0.93291	0.0424455	0.802702
P19137	Lama1	1.22878	0.436757	1.69016	0.305135	1.61329	0.036196	2.07467	0.0206495
P19157	Gstp1	0.199395	0.397968	-0.0778255	0.410907	0.131833	0.580715	-0.145388	0.237286
P19246	Nefh	0.0129693	0.968514	-0.513745	0.133063	0.224403	0.421387	-0.302312	0.214495
P19253	Rpl13a	0.723291	0.278281	0.320439	0.51456	0.314804	0.646648	-0.0880477	0.874367
P19536	Cox5b	-0.23731	0.140067	-0.145412	0.369238	0.0673523	0.744447	0.159251	0.476435
P19783	Cox4i1	1.22589	0.0168532	1.39544	0.00816468	0.891675	0.0150922	1.06122	0.00430525
P20029	Hspa5	-1.53019	0.229824	-0.432317	0.0657614	-1.55535	0.222367	-0.457483	0.0370485
P20060	Hexb	-0.42448	0.0397073	-0.279979	0.150455	-0.302969	0.083547	-0.158468	0.34915
P20108	Prdx3	-0.297855	0.0663692	-0.387712	0.0546998	-0.303504	0.0195172	-0.393361	0.0264239
P20152	Vim	-0.409295	0.213394	-0.592015	0.0560721	-0.585586	0.118643	-0.768305	0.035002
P20352	F3	2.30826	0.0136075	2.37187	0.0282635	2.06026	0.011747	2.12387	0.0302243
P20357	Map2	-0.56344	0.228701	-0.599557	0.246787	-0.447873	0.018456	-0.48399	0.100572
P20444	Prkca	0.587191	0.0203376	0.692528	0.0035466	0.700587	0.0127702	0.805923	0.00261477
P20917	Mag	-0.430285	0.346684	1.07892	0.332657	-0.542879	0.201886	0.966323	0.371576
P20917-2	Mag	0.497896	0.0197679	0.656089	0.0109142	0.557657	0.0155776	0.71585	0.0090761
P20934	Evi2a	1.01643	0.0452769	0.837246	0.0135414	-0.732626	0.40934	-0.911813	0.28539
P21107-2	Tpm3	-1.55682	0.325256	-0.363102	0.112881	-1.31959	0.394737	-0.12587	0.427909
P21278	Gna11	0.378718	0.0125128	0.257284	0.200828	0.367622	0.00991929	0.246188	0.207919
P21279	Gnaq	0.360793	0.00181527	0.407172	0.011054	0.346005	0.0179501	0.392384	0.0290497
P21447	Abcb1a	2.29927	0.00405724	1.6522	0.0237851	2.05984	0.00576424	1.41277	0.0375194
P21460	Cst3	-0.352712	0.0485166	-0.155303	0.265655	0.200041	0.349302	0.397451	0.0984443
P21614	Gc	1.30684	0.0468302	-0.328847	0.314522	2.0441	0.0101882	0.408413	0.196279
P21619	Lmnb2	0.14753	0.607415	-0.564756	0.14845	0.225954	0.221132	-0.486332	0.104443
P21836	Ache	0.99813	0.111331	0.396399	0.285991	1.06484	0.0817128	0.463112	0.167269
P21981	Tgm2	1.21882	0.0233137	0.191902	0.49799	0.893821	0.128159	-0.133099	0.761785
P21995	Emb	2.92742	0.0261689	2.06038	0.00332327	2.3748	0.0466072	1.50777	0.00635152
P22315	Fech	0.173705	0.461017	-0.0590226	0.755338	0.324712	0.176742	0.0919844	0.592639
P22682	Cbl	0.760657	0.2125	1.73926	0.0307322	0.687602	0.0364374	1.66621	0.00311942
P22723;P22723-2	Gabrg2	1.99657	0.00599707	2.20444	0.00277485	1.75404	0.0151552	1.96191	0.00775618
P22892	Ap1g1	-0.027914	0.819714	0.193294	0.211892	0.106905	0.337567	0.328113	0.04736
P22933	Gabrd	3.94639	0.00849235	4.045	0.0332033	3.97004	0.00360287	4.06866	0.0251152
P23116	Eif3a	-0.44247	0.103524	-0.295838	0.0339396	-0.436382	0.107814	-0.289749	0.0380211
P23198	Cbx3	0.221599	0.216715	0.316396	0.701817	0.399317	0.304748	0.494114	0.582294
P23242	Gja1	2.59473	0.00203807	2.56375	0.00504921	2.46224	0.00410716	2.43126	0.00840457
P23475	Xrcc6	-0.821675	0.391191	-0.38001	0.684921	-1.39869	0.210434	-0.957024	0.371735
P23492	Pnp	-1.65263	0.214881	-0.107745	0.313944	-1.55723	0.241015	-0.0123533	0.947444
P23506;P23506-2	Pcmt1	0.765959	0.472096	1.51627	0.0542981	0.589737	0.506138	1.34005	0.00224895
P23780	Glb1	-0.288079	0.658331	0.0519129	0.944339	-0.418052	0.504774	-0.0780598	0.91292
P23818	Gria1	1.45906	0.00919397	1.64751	0.0016098	1.37401	0.0109015	1.56246	0.00180654
P23819;P23819-4	Gria2	1.60735	0.00897717	2.00027	0.00411864	1.42468	0.00752578	1.8176	0.00313015
P23953	Ces1c	0.517103	0.596716	-0.0412057	0.96875	0.967045	0.119869	0.408736	0.556174
P24270	Cat	-1.73342	0.185689	-0.734908	0.0390651	-1.58363	0.22448	-0.585121	0.133136
P24288	Bcat1	-0.113577	0.400487	-0.317112	0.0869763	0.247278	0.14594	0.0437438	0.791568
P24369	Ppib	-0.658187	0.259604	0.227465	0.328188	-1.10637	0.107112	-0.220721	0.467371
P24452	Capg	-2.23309	0.351638	-0.2346	0.752232	-2.26987	0.34403	-0.271379	0.711941
P24527	Lta4h	-0.160034	0.292547	-0.120965	0.396829	-0.0653292	0.673983	-0.0262604	0.860379
P24529	Th	-0.700341	0.0687267	0.520346	0.523214	-0.808897	0.18974	0.41179	0.656554
P24547	Impdh2	-1.33565	0.121776	-0.642734	0.288964	-1.20195	0.195979	-0.509028	0.472511
P24549	Aldh1a1	-0.162645	0.305084	-0.376733	0.222964	0.0993506	0.733055	-0.114737	0.759911
P24668	M6pr	1.76779	0.0751802	1.22679	0.0305594	1.67217	0.0651183	1.13117	0.00320262
P25233	Ndn	-0.0775064	0.912187	-0.0407139	0.938722	-0.763951	0.251345	-0.727159	0.120941
P25444	Rps2	-0.218405	0.634822	0.0624205	0.847705	-0.227601	0.611744	0.0532252	0.862573
P26039	Tln1	-0.663194	0.374748	0.0620257	0.870378	-0.573943	0.441221	0.151277	0.703965
P26041	Msn	-0.305558	0.49292	-0.27827	0.131722	-0.29974	0.485174	-0.272453	0.0495648
P26043	Rdx	0.873211	0.313493	-0.00950019	0.970426	0.274271	0.771746	-0.60844	0.301992
P26048	Gabra2	2.18807	0.0174611	3.10647	0.00626649	1.57306	0.0113472	2.49146	0.00341802
P26049	Gabra3	2.90907	0.0342648	3.68077	0.0319637	2.78189	0.0254333	3.5536	0.027176
P26231	Ctnna1	0.621541	0.696293	0.11872	0.92809	1.41137	0.34856	0.908549	0.435929
P26369	U2af2	-0.405983	0.169317	-0.218287	0.172986	-0.352268	0.196604	-0.164572	0.181866
P26443	Glud1	-0.26715	0.213773	-0.453146	0.0579308	-0.124902	0.380921	-0.310898	0.0525559
P26516	Psmd7	-0.206644	0.78314	0.151643	0.661522	-0.305933	0.662245	0.0523545	0.785676
P26638	Sars1	-0.384327	0.0716373	-0.1868	0.07418	-0.337669	0.0902927	-0.140142	0.0964286
P26645	Marcks	2.18883	0.125734	2.32219	0.0492557	1.84185	0.158157	1.97521	0.0542858
P26883	Fkbp1a	-0.576832	0.121686	-0.169331	0.50922	-0.419714	0.182822	-0.0122128	0.951792
P27546;P27546-2	Map4	0.784237	0.297966	-0.313551	0.429923	0.938436	0.209997	-0.159351	0.628938
P27546-4	Map4	-0.074199	0.541569	-0.146786	0.217552	0.00876999	0.948222	-0.0638173	0.615714
P27573	Mpz	2.758	0.0789063	0.063295	0.975139	1.52507	0.381881	-1.16963	0.617284
P27601	Gna13	0.565889	0.0191169	0.539023	0.00802941	0.601313	0.0132848	0.574446	0.00457972
P27612	Plaa	0.530941	0.0158895	0.384277	0.0244564	0.535329	0.00748616	0.388665	0.0072217
P27659	Rpl3	1.0158	0.0140122	1.02633	0.0043127	0.479239	0.121165	0.489774	0.0504462
P27671	Rasgrf1	0.598317	0.578624	0.722466	0.428826	-0.320365	0.694977	-0.196217	0.724852
P27773	Pdia3	-0.370437	0.128031	-0.263394	0.22454	-0.201452	0.0768313	-0.0944087	0.184692
P28028;P28028-1	Braf	1.13069	0.287451	3.23215	0.00732538	0.56487	0.541891	2.66633	0.00735916
P28063	Psmb8	-1.24423	0.377103	-0.0135956	0.950127	-1.26152	0.368613	-0.0308825	0.848743
P28271	Aco1	-0.0862843	0.522786	0.132052	0.409052	-0.183494	0.360082	0.0348428	0.864887
P28352	Apex1	-0.361782	0.00715997	-0.280938	0.021364	-0.137471	0.13143	-0.0566273	0.506272
P28474	Adh5	-0.00626119	0.971228	0.115349	0.550268	-0.0609093	0.624891	0.0607007	0.674341
P28571-1	Slc6a9	2.93328	0.00702927	2.67382	0.011156	2.49632	0.0102027	2.23686	0.0171668
P28650	Adss1	0.151804	0.886718	0.195763	0.74652	0.684697	0.523553	0.728656	0.241132
P28652	Camk2b	0.219231	0.143357	0.309769	0.0668133	0.38992	0.00797006	0.480458	0.00468111
P28656	Nap1l1	-0.214962	0.793187	-0.30485	0.516864	-0.145256	0.864771	-0.235144	0.653767
P28658	Atxn10	0.710931	0.0657728	0.684101	0.173244	1.18141	0.00467604	1.15458	0.0343023
P28660	Nckap1	1.43332	0.0124286	1.65366	0.00699936	0.992247	0.00653565	1.21259	0.00243846
P28661;P28661-2;P28661-3	Septin4	0.553906	0.165407	0.426575	0.243513	0.759124	0.0386698	0.631793	0.0519871
P28663	Napb	-0.0755208	0.301257	0.00452105	0.966093	0.00757472	0.919831	0.0876166	0.449247
P28665	Mug1	2.63102	0.125435	2.58229	0.0804108	2.67603	0.106187	2.6273	0.0611072
P28738	Kif5c	-0.181424	0.0187555	-0.199745	0.0247927	-0.0783043	0.552002	-0.096626	0.481984
P28740;P28740-1;P28740-2	Kif2a	-0.0503496	0.8058	0.0326252	0.82459	0.0195796	0.899198	0.102554	0.149963
P28867;P28867-2	Prkcd	-0.14445	0.547141	1.29579	0.261566	0.248966	0.144317	1.68921	0.158923
P29341	Pabpc1	-0.490334	0.160031	-0.208991	0.0372774	-0.463808	0.175264	-0.182465	0.0305267
P29387	Gnb4	-0.67347	0.0433896	-0.0722659	0.817597	-0.165191	0.411668	0.436013	0.163259
P29391	Ftl1	-0.220414	0.745246	-0.613906	0.447686	-0.213681	0.741705	-0.607173	0.438076
P29416	Hexa	1.09044	0.126383	0.684919	0.392756	0.992414	0.186365	0.586898	0.483834
P29595	Nedd8	-0.235216	0.501514	-0.292184	0.423599	-0.152895	0.544784	-0.209862	0.438487
P29758	Oat	-0.41379	0.0694606	-0.537493	0.00593653	-0.330388	0.183637	-0.454091	0.0434482
P30275	Ckmt1	-0.326413	0.162376	-0.373245	0.121082	-0.133908	0.261055	-0.18074	0.148035
P30416	Fkbp4	-0.342633	0.0594803	-0.232325	0.187133	-0.169572	0.439462	-0.0592642	0.789723
P30999	Ctnnd1	2.89556	0.00343248	2.88707	0.0013955	2.61203	0.00212838	2.60354	0.000350607
P30999-2;P30999-3	Ctnnd1	2.61806	0.0550842	3.58629	0.00371529	2.29683	0.0462974	3.26506	0.000103051
P31001	Des	-2.11801	0.448185	-0.593448	0.755189	-1.85663	0.409767	-0.332065	0.740565
P31230	Aimp1	-0.663906	0.211176	-0.295616	0.334899	-0.694727	0.184399	-0.326437	0.258735
P31324	Prkar2b	3.65009	0.0108776	4.4393	0.00337407	3.2367	0.0026694	4.0259	0.000159006
P31648	Slc6a1	2.11994	0.00621468	2.57053	0.00255898	1.59011	0.0209238	2.0407	0.00774923
P31650	Slc6a11	2.61404	0.0039217	2.30087	0.0045444	2.2048	0.00408177	1.89163	0.00453451
P31750	Akt1	-1.0445	0.215793	-0.446308	0.627702	-1.29639	0.0881547	-0.698198	0.400616
P31786	Dbi	0.124428	0.843486	-0.116527	0.797071	-0.790734	0.318307	-1.03169	0.138828
P31938	Map2k1	0.268267	0.128968	0.267577	0.125402	0.190435	0.182008	0.189746	0.175793
P32020;P32020-2	Scp2	-0.134689	0.646547	-0.129962	0.643505	0.13614	0.664619	0.140866	0.64151
P32037	Slc2a3	3.32341	0.0124945	4.04426	0.00390388	2.87046	0.00555645	3.59131	0.00067084
P32067	Ssb	-1.62758	0.148051	-0.35726	0.828313	-0.39256	0.455001	0.877756	0.546608
P32211	Chrm4	0.606379	0.607541	1.27975	0.336625	-1.20203	0.00378531	-0.528663	0.330707
P32233	Drg1	-1.02641	0.196966	0.270644	0.186601	-1.28719	0.205938	0.00986417	0.986848
P32883-2	Kras	0.417339	0.249073	0.620909	0.131456	0.150138	0.343458	0.353708	0.116413
P32921;P32921-2	Wars1	-0.296782	0.0336242	-0.289846	0.0857198	-0.0394917	0.724487	-0.0325556	0.822501
P33173	Kif1a	-0.019406	0.920255	0.00715192	0.969499	0.0323871	0.824002	0.058945	0.66887
P33609	Pola1	-1.92959	0.286087	0.561433	0.530626	-2.78787	0.153977	-0.296851	0.74591
P34152;P34152-2;P34152-4	Ptk2	1.57578	0.0274561	2.17617	0.0911777	1.11738	0.0145633	1.71776	0.131303
P34884	Mif	-0.247631	0.149327	-0.172118	0.22732	-0.00433159	0.967243	0.0711816	0.375725
P35235-1	Ptpn11	1.30557	0.00878156	1.28119	0.00998423	1.11354	0.00199255	1.08916	0.00264778
P35276	Rab3d	1.02967	0.0091687	1.34923	0.00187624	0.576264	0.0142742	0.895823	0.000310036
P35278	Rab5c	0.358346	0.154596	0.453771	0.147616	-0.24301	0.0931894	-0.147585	0.471729
P35279;P35279-2	Rab6a	2.64071	0.23468	0.7534	0.193321	2.1754	0.312856	0.288089	0.571819
P35282	Rab21	0.623423	0.322695	1.12747	0.0168824	0.454214	0.424711	0.958266	0.00773668
P35283	Rab12	1.59727	0.0340432	1.36551	0.0386117	1.41797	0.00948692	1.1862	0.00399848
P35288	Rab23	3.25529	0.112611	3.2599	0.0101325	2.77264	0.157453	2.77724	0.0157198
P35293	Rab18	0.0220165	0.95317	0.796012	0.00981782	-0.306338	0.398166	0.467657	0.0103621
P35436	Grin2a	2.02001	0.0172721	2.04048	0.00365276	1.78284	0.0224919	1.80331	0.00382237
P35438	Grin1	1.5104	0.0242026	1.86602	0.00916106	1.35293	0.0144859	1.70855	0.00383346
P35486	Pdha1	-0.456252	0.192114	-0.486115	0.16066	-0.106762	0.360966	-0.136625	0.150411
P35492	Hal	-4.61913	0.0362969	-2.41117	0.150245	-2.41008	0.0449467	-0.202122	0.738065
P35505	Fah	0.845865	0.299255	-0.441895	0.243738	1.12197	0.179407	-0.16579	0.583162
P35550	Fbl	-0.705812	0.346218	-0.272594	0.336973	-0.771224	0.309787	-0.338006	0.255849
P35564	Canx	0.335722	0.0167955	0.306908	0.046479	0.268372	0.00126752	0.239557	0.0319062
P35585	Ap1m1	0.493649	0.220217	1.07777	0.00596093	0.386549	0.285502	0.970667	0.00324031
P35700	Prdx1	-0.940976	0.408826	-0.0163759	0.817328	-0.895253	0.431996	0.0293477	0.817335
P35762	Cd81	2.09164	0.0318596	2.03337	0.0640876	1.08348	0.242249	1.02521	0.327916
P35802	Gpm6a	2.76667	0.0111207	3.45731	0.0035733	2.32614	0.00506959	3.01678	0.000773042
P35803	Gpm6b	2.52302	0.014849	3.29383	0.00409165	2.3281	0.00386537	3.0989	0.000410731
P35821	Ptpn1	-0.364773	0.442934	0.415153	0.26002	-0.661319	0.389175	0.118607	0.857888
P35979	Rpl12	-0.163931	0.278114	0.342163	0.135089	0.00573889	0.957399	0.511833	0.0349956
P35980	Rpl18	-0.0737089	0.898759	-0.0972582	0.887389	-0.37477	0.565378	-0.398319	0.595531
P36536;Q9CQC9	Sar1a;Sar1b	0.473152	0.0772322	0.830521	0.0161443	0.299946	0.123873	0.657316	0.0160553
P36916	Gnl1	0.688383	0.047386	0.692127	0.0275664	0.757073	0.0208394	0.760817	0.00820864
P36993;P36993-3;P36993-4;P36993-5	Ppm1b	1.5714	0.23552	0.425527	0.500672	0.79814	0.569095	-0.347731	0.703256
P37040	Por	0.53228	0.049083	0.628537	0.00335267	0.58098	0.086276	0.677237	0.027295
P37172	Acvr1	2.26231	0.133761	1.73546	0.185003	0.492155	0.702169	-0.0347029	0.975828
P37804	Tagln	1.76393	0.103717	0.282957	0.657241	-0.0237719	0.989045	-1.50475	0.376518
P38060	Hmgcl	-1.71228	0.301761	-1.4793	0.33655	-0.0671037	0.903162	0.165873	0.272253
P38585	Ttl	0.62829	0.0212416	1.58575	0.0509814	-0.481291	0.698537	0.476174	0.728718
P38647	Hspa9	-0.501977	0.133739	-0.551256	0.119406	-0.409304	0.00113992	-0.458583	0.00804983
P39053-3	Dnm1	-0.108402	0.133715	0.00940323	0.920029	-0.115209	0.225702	0.00259654	0.981339
P39053-6	Dnm1	0.306094	0.438596	-0.139607	0.751869	0.485613	0.0254242	0.0399119	0.880927
P39054;P39054-2	Dnm2	-0.907515	0.434875	-0.0502917	0.861716	-0.7545	0.511003	0.102723	0.724562
P39087;P39087-2	Grik2	1.91058	0.0357808	2.09497	0.0512389	2.16573	0.00593564	2.35012	0.0178628
P39447	Tjp1	0.486746	0.265029	0.225439	0.473178	0.46311	0.285413	0.201804	0.517978
P39688	Fyn	1.42511	0.0860604	2.03843	0.0313476	0.45807	0.666259	1.07139	0.337635
P40124	Cap1	-0.0430578	0.750174	0.1003	0.305881	-0.0875041	0.533218	0.0558535	0.563531
P40142	Tkt	-0.0350844	0.825463	-0.122241	0.371872	0.154287	0.337346	0.067131	0.582857
P40237	Cd82	3.00554	0.0528714	1.7156	0.0186613	3.01738	0.0450155	1.72744	0.00360192
P40240	Cd9	2.66338	0.00649453	2.21031	0.0308395	2.3295	0.000260607	1.87644	0.0176163
P40336;P40336-2	Vps26a	-0.292822	0.813956	1.07068	0.0601032	-0.372589	0.756595	0.990916	0.0209325
P41105	Rpl28	0.303026	0.655436	0.922339	0.0584779	0.0571655	0.927827	0.676479	0.0733265
P41216	Acsl1	0.0160583	0.972646	0.866839	0.0171978	0.0945326	0.827693	0.945314	0.00276266
P41233	Abca1	-0.0847079	0.905186	0.207818	0.699817	-0.534788	0.483548	-0.242262	0.674124
P41234	Abca2	-0.591642	0.640404	-0.995117	0.571662	-0.0354929	0.971386	-0.438968	0.777352
P41241	Csk	-0.217684	0.799872	-0.232971	0.648052	-0.658116	0.403044	-0.673403	0.0686231
P42125	Eci1	1.37854	0.455438	-0.185066	0.759733	1.89093	0.303001	0.327323	0.346844
P42225	Stat1	2.19103	0.0216706	2.25458	0.0172047	1.05464	0.259988	1.11819	0.22796
P42669	Pura	-0.959221	0.185347	-0.287777	0.314356	-0.796724	0.222707	-0.12528	0.219037
P42859	Htt	1.24124	0.0349623	1.40779	0.00783965	1.0224	0.0402584	1.18896	0.00429823
P42932	Cct8	0.575335	0.0254709	0.710449	0.00942486	0.449691	0.00621656	0.584804	0.000403475
P43006;P43006-2	Slc1a2	2.57465	0.0175225	3.06651	0.00784247	2.22435	0.00816387	2.71621	0.00240815
P43274	H1-4	-0.553216	0.40898	-0.653964	0.354625	-0.585782	0.359798	-0.68653	0.311461
P43276	H1-5	-0.272338	0.81477	-0.0670948	0.940252	-0.566153	0.635104	-0.36091	0.696629
P43406	Itgav	0.263011	0.299118	0.233957	0.314914	0.241508	0.381786	0.212454	0.409739
P45376	Akr1b1	-0.32596	0.138192	-0.204187	0.327024	-0.270819	0.164498	-0.149047	0.421908
P45377	Akr1b8	0.380706	0.301554	-0.0244401	0.914604	0.181866	0.652519	-0.223281	0.481059
P45591	Cfl2	-1.23192	0.291182	0.681525	0.448197	-1.7465	0.189572	0.166946	0.865446
P45878	Fkbp2	-0.571658	0.172958	-0.414822	0.284298	-0.5344	0.0542159	-0.377564	0.105847
P45952	Acadm	-0.323179	0.376009	-0.551301	0.146719	-0.222053	0.173525	-0.450175	0.00526501
P46061	Rangap1	-1.41872	0.126107	0.840871	0.285287	-0.694772	0.417933	1.56482	0.0951379
P46096	Syt1	2.29828	0.0131604	2.63151	0.00665523	2.16384	0.00316982	2.49707	0.000978941
P46097	Syt2	1.00061	0.0212046	0.389176	0.439998	0.896189	0.0121978	0.284756	0.533485
P46460	Nsf	0.0950006	0.0322079	0.142415	0.00748562	0.218945	0.00201281	0.266359	0.000845192
P46467;Q8BPY9;Q8VEJ9	Fignl1;Vps4a;Vps4b	-0.386337	0.835859	0.618072	0.746253	1.70752	0.224769	2.71193	0.0942144
P46471	Psmc2	-0.600434	0.0552447	-0.0458918	0.903525	-0.541309	0.014003	0.0132325	0.967474
P46638	Rab11b	1.22221	0.0392629	1.68662	0.00438639	0.86569	0.0473892	1.33011	0.000358863
P46660	Ina	-0.193995	0.470719	-0.372188	0.106591	0.0670287	0.759709	-0.111165	0.409948
P46664	Adss2	0.0805012	0.608614	0.00043424	0.996903	0.168821	0.433285	0.0887543	0.621729
P46735;P46735-2	Myo1b	-1.70442	0.244031	-0.317744	0.199098	-2.79334	0.163691	-1.40666	0.263691
P46737	Brcc3	1.54041	0.069001	0.830163	0.126286	1.05368	0.166965	0.343432	0.47131
P46935	Nedd4	0.517434	0.239847	1.02954	0.0446007	0.385799	0.11742	0.897907	0.004361
P46978	Stt3a	1.60058	0.439008	1.31908	0.0344634	1.25916	0.535643	0.977661	0.0712043
P47199	Cryz	-0.113396	0.504369	-0.458312	0.0986653	-0.024305	0.543374	-0.369221	0.072009
P47708	Rph3a	0.0257339	0.917775	0.379758	0.184198	0.182688	0.117453	0.536712	0.00554075
P47738	Aldh2	-0.21241	0.419948	-0.281617	0.325813	-0.235996	0.265573	-0.305203	0.204851
P47740	Aldh3a2	0.344428	0.807063	1.87127	0.00156311	0.1724	0.901603	1.69924	0.000647644
P47743	Grm8	3.81966	0.0229284	4.47689	0.00315884	3.51606	0.0151397	4.1733	0.000231988
P47746	Cnr1	4.54629	0.0163094	5.90814	0.00620005	3.89691	0.0181851	5.25875	0.00598853
P47753	Capza1	-3.37968	0.0682149	-0.130675	0.665922	-3.70603	0.053859	-0.457026	0.221569
P47754	Capza2	-0.278971	0.564684	0.301112	8.25482e-05	-0.537444	0.295346	0.0426394	0.392645
P47757	Capzb	-0.0101999	0.981002	0.443949	0.0463733	-0.237714	0.559179	0.216434	0.0065507
P47757-2;P47757-4	Capzb	1.0057	0.261017	1.6566	0.0798831	-0.171229	0.855268	0.479662	0.593925
P47758	Srprb	1.53966	0.116694	1.36321	0.061481	0.0400124	0.970388	-0.13644	0.879285
P47791;P47791-2	Gsr	-0.00997798	0.959922	-0.158489	0.458116	-0.13577	0.552098	-0.284281	0.257199
P47802	Mtx1	1.25524	0.00264285	1.17709	0.0470717	1.29403	0.00169086	1.21588	0.0407593
P47809	Map2k4	0.348308	0.203069	0.0224762	0.903071	0.38198	0.127828	0.0561485	0.691298
P47857;P47857-2;P47857-3	Pfkm	0.175294	0.260148	0.140727	0.325944	0.168087	0.281107	0.133519	0.352957
P47911	Rpl6	1.01083	0.0545951	1.16715	0.0159972	0.659342	0.0759266	0.815653	0.00461938
P47934	Crat	-0.392261	0.355323	0.197712	0.709227	-0.101269	0.818025	0.488704	0.402145
P47941	Crkl	1.67712	0.139942	-0.115773	0.613115	1.42325	0.207016	-0.369637	0.322599
P47962	Rpl5	0.3283	0.422283	0.434089	0.0707963	0.03254	0.930423	0.138329	0.372099
P47963	Rpl13	-1.22789	0.124101	-0.781469	0.195793	-0.99762	0.189389	-0.551195	0.334661
P47964	Rpl36	-1.02239	0.332866	-1.00104	0.157964	-0.369184	0.696666	-0.347834	0.521999
P48036	Anxa5	-0.569611	0.255685	-0.445875	0.082109	-0.504948	0.290195	-0.381212	0.0714687
P48168	Glrb	1.11249	0.176903	1.19901	0.324779	1.62734	0.00503756	1.71386	0.121773
P48318	Gad1	-0.257525	0.166474	-0.225507	0.276811	-0.0482016	0.68778	-0.0161839	0.917077
P48320	Gad2	0.039039	0.848744	-0.279817	0.124547	0.362233	0.143725	0.0433769	0.792651
P48453;P48453-2	Ppp3cb	0.973065	0.0179202	1.00705	0.00982576	0.712056	0.0284395	0.746044	0.0121076
P48543	Kcnj9	1.61244	0.194398	1.46044	0.0807194	0.762868	0.522889	0.610866	0.441624
P48678;P48678-2	Lmna	-0.876169	0.210224	-0.586909	0.0144283	-0.782728	0.254876	-0.493468	0.0295953
P48722;P48722-2	Hspa4l	-0.0569324	0.614412	-0.143515	0.23997	0.0656706	0.513661	-0.0209115	0.830246
P48758	Cbr1	-0.0785408	0.51075	-0.19179	0.186434	-0.0506312	0.694775	-0.16388	0.27762
P48771	Cox7a2	0.526915	0.0123851	0.586469	0.0382296	0.495365	0.00938328	0.554919	0.0385922
P48774	Gstm5	-0.0431919	0.788459	-0.0184561	0.857321	-0.156258	0.399637	-0.131522	0.330602
P48962	Slc25a4	0.88802	0.0193898	0.963433	0.00876111	0.608124	0.0391559	0.683537	0.0132894
P49025;P49025-3;P49025-4;P49025-5	Cit	-0.197736	0.476161	-0.00801086	0.97265	-0.056729	0.786118	0.132996	0.430598
P49282;P49282-2;P49282-3;P49282-4	Slc11a2	0.425253	0.543911	0.290315	0.662116	-0.310525	0.573345	-0.445462	0.400592
P49312	Hnrnpa1	-0.841435	0.133445	-0.387384	0.204115	-0.851003	0.144418	-0.396952	0.246429
P49442	Inpp1	0.350812	0.28902	0.416753	0.231948	0.404046	0.0755521	0.469987	0.062931
P49443	Ppm1a	0.592893	0.121259	0.660752	0.120875	0.718973	0.00103767	0.786832	0.00981053
P49446;P49446-2;P49446-3	Ptpre	1.80638	0.219613	2.75437	0.0554153	1.58486	0.22198	2.53286	0.0404121
P49615	Cdk5	-0.324841	0.1777	-0.195406	0.283124	-0.176397	0.281901	-0.0469615	0.560525
P49717	Mcm4	-0.841056	0.513817	0.884411	0.185772	-1.11748	0.397716	0.607982	0.343666
P49722	Psma2	-1.73829	0.190864	-0.603861	0.174214	-1.42491	0.266406	-0.290476	0.467969
P49769	Psen1	4.05364	0.00369279	3.95329	0.000550914	3.47429	0.00381553	3.37395	8.22268e-05
P49817	Cav1	1.63152	0.018148	0.705595	0.116321	1.20851	0.0286743	0.282583	0.364551
P50114	S100b	0.303636	0.448427	-0.450832	0.122902	0.594164	0.233313	-0.160305	0.64209
P50153	Gng4	1.9757	0.0267266	0.551724	0.00971168	1.82464	0.0384047	0.400656	0.119258
P50171;P50171-2	Hsd17b8	0.274778	0.451774	0.333994	0.460474	0.363625	0.483464	0.422841	0.469709
P50172	Hsd11b1	1.46939	0.0754438	1.62924	0.153292	0.991877	0.140976	1.15173	0.259999
P50247	Ahcy	-1.06729	0.230256	-0.163841	0.26964	-1.00552	0.250739	-0.102077	0.321378
P50396	Gdi1	-0.125523	0.271299	0.0432415	0.674625	0.0480588	0.681993	0.216823	0.111353
P50428	Arsa	-0.213577	0.767789	-0.63685	0.301114	0.294479	0.560096	-0.128795	0.583062
P50429;P50429-2	Arsb	-0.660867	0.0654954	-0.466598	0.147553	-0.472512	0.00937951	-0.278243	0.0429792
P50446	Krt6a	-3.34067	0.404241	-1.40379	0.371458	-4.36729	0.293751	-2.43041	0.174521
P50516	Atp6v1a	0.192708	0.0882761	0.254134	0.0722157	0.219649	0.00957643	0.281075	0.0210442
P50518	Atp6v1e1	-0.400869	0.280516	-0.379442	0.166452	-0.297393	0.3146	-0.275965	0.0805479
P50543	S100a11	-1.9422	0.462064	0.875786	0.331949	-2.20868	0.403657	0.609303	0.446472
P50544	Acadvl	-1.99377	0.417262	0.0204976	0.957839	-2.15417	0.382762	-0.139907	0.682945
P50571	Gabrb1	2.54188	0.0173097	2.3453	0.00338695	2.26918	0.0195782	2.07259	0.00195371
P50580	Pa2g4	-0.808159	0.25613	0.063454	0.839676	-0.999437	0.180531	-0.127824	0.698684
P51150	Rab7a	0.420962	0.469413	1.10278	0.0107422	0.178614	0.726599	0.860428	0.000719191
P51163	Uros	0.708443	0.563789	-0.623203	0.580539	0.664497	0.543613	-0.667149	0.49995
P51174	Acadl	-0.0102208	0.970029	-0.324106	0.187295	0.0379009	0.889043	-0.275984	0.245868
P51410	Rpl9	-0.426446	0.32397	-0.403954	0.372693	-0.415362	0.375425	-0.39287	0.420648
P51655	Gpc4	0.215676	0.159168	0.221337	0.274334	0.158818	0.109023	0.164479	0.319406
P51660	Hsd17b4	-0.362511	0.305551	0.107786	0.526372	-0.350401	0.297612	0.119897	0.377286
P51791;P51791-2;P51791-3;P51791-4;P51791-5	Clcn3	3.73034	0.02098	2.82465	0.159946	3.33116	0.0164095	2.42546	0.190024
P51830	Adcy9	2.54863	0.0302931	3.43237	0.0046807	2.0704	0.0264479	2.95414	0.00112261
P51855	Gss	-1.47287	0.146551	-0.75258	0.22649	-1.74508	0.136429	-1.02479	0.215993
P51859	Hdgf	0.288294	0.756029	-0.392898	0.640141	0.409519	0.747751	-0.271674	0.821151
P51863	Atp6v0d1	0.192743	0.10866	0.182478	0.175947	0.30754	0.0385139	0.297274	0.0648568
P51880	Fabp7	0.943164	0.259451	1.99002	0.119845	0.575591	0.476488	1.62245	0.186831
P51881	Slc25a5	0.731422	0.0261902	0.683724	0.0261499	0.597489	0.0111909	0.549791	0.00766263
P51906	Slc1a1	0.190124	0.854237	0.595711	0.591445	0.530682	0.313286	0.936269	0.171001
P51910	Apod	2.17897	0.0994034	0.876861	0.0554373	1.97838	0.120103	0.676272	0.0700546
P52187	Kcnj12	0.482211	0.620295	-0.143628	0.855802	0.498679	0.4036	-0.12716	0.475255
P52189	Kcnj4	2.65377	0.0418062	4.04775	0.00563403	2.8815	0.00795186	4.27548	0.000157011
P52196	Tst	-0.151347	0.399586	-0.347079	0.0954129	-0.230802	0.191836	-0.426534	0.0432116
P52293	Kpna2	-2.89923	0.148055	-0.734705	0.329278	-2.21301	0.240979	-0.0484791	0.942691
P52431	Pold1	-0.431721	0.333078	-0.917077	0.130487	-2.84367	0.175305	-3.32902	0.130126
P52479;P52479-2	Usp10	1.49979	0.410742	1.73278	0.120867	1.28988	0.473701	1.52288	0.158057
P52480	Pkm	-0.713792	0.185176	-0.212459	0.139375	-0.623439	0.232312	-0.122106	0.297189
P52480-2	Pkm	-0.179001	0.210658	-0.160591	0.13659	-0.204639	0.143074	-0.186228	0.068811
P52503	Ndufs6	-0.459287	0.23313	-0.750786	0.0251241	-0.0900822	0.771938	-0.381581	0.0677585
P52760	Rida	-0.11316	0.705159	-0.272033	0.0580794	-0.25552	0.434231	-0.414393	0.0422023
P52795	Efnb1	3.23178	0.0244808	3.35237	0.0112481	2.52715	0.0315053	2.64774	0.00997358
P52800	Efnb2	4.05355	0.000512025	3.20681	0.016983	3.61321	0.000435724	2.76647	0.0246522
P52825	Cpt2	0.59836	0.472981	-0.111412	0.825685	1.11706	0.400914	0.407284	0.71365
P53026	Rpl10a	0.0635134	0.826475	1.30718	0.387488	0.375648	0.0963787	1.61931	0.291244
P53395	Dbt	0.0734666	0.821476	-0.476611	0.108708	0.121225	0.618019	-0.428853	0.0151645
P53612	Rabggtb	2.23841	0.00734816	1.35792	0.122982	2.16813	0.00199191	1.28764	0.104291
P53668	Limk1	1.75689	0.0295272	1.34701	0.199733	1.815	0.00905438	1.40512	0.153012
P53702	Hccs	0.0250206	0.954413	0.455255	0.329626	0.089084	0.85086	0.519319	0.306646
P53798	Fdft1	-0.174609	0.707418	0.282641	0.601637	0.0092268	0.972515	0.466477	0.257791
P53810	Pitpna	0.718393	0.0137546	0.865405	0.00799261	0.449343	0.0144394	0.596354	0.00687907
P53811	Pitpnb	1.08342	0.286981	0.79481	0.388857	0.745876	0.487485	0.457264	0.646196
P53986	Slc16a1	2.85453	0.00667505	3.68965	0.0200283	2.46361	0.00401493	3.29873	0.0226334
P53994	Rab2a	0.541997	0.150084	1.00852	0.0109655	0.331118	0.253109	0.797642	0.00454845
P53995	Anapc1	1.60324	0.0253684	1.75482	0.0195901	0.464286	0.46587	0.61586	0.348395
P53996;P53996-2;P53996-3	Cnbp	0.339478	0.145478	0.351466	0.337244	0.489959	0.159734	0.501947	0.26394
P54071	Idh2	-0.0277907	0.910482	-0.277242	0.229232	-0.011563	0.955678	-0.261014	0.157365
P54227	Stmn1	0.0580212	0.944496	0.304736	0.750403	-0.809309	0.148364	-0.562594	0.419282
P54285	Cacnb3	1.18479	0.218587	1.97588	0.0703933	0.903987	0.314561	1.69508	0.0955105
P54728	Rad23b	0.249347	0.732289	1.56573	0.152436	0.442909	0.316715	1.75929	0.0632515
P54754	Ephb3	-0.262336	0.771723	0.908538	0.361288	-0.196162	0.80557	0.974713	0.283698
P54763;P54763-2;P54763-4	Ephb2	1.37658	0.327555	1.22119	0.352649	0.961336	0.484508	0.805944	0.53113
P54775	Psmc4	-1.26012	0.0641046	0.628073	0.594903	-1.15245	0.0852325	0.735741	0.537846
P54818	Galc	0.755746	0.35686	0.792018	0.240612	0.516672	0.429136	0.552944	0.225343
P54822	Adsl	0.133192	0.393298	0.0314159	0.795935	-0.0638183	0.816435	-0.165594	0.5354
P54823	Ddx6	-0.342428	0.165984	0.0766249	0.626649	-0.587133	0.0485906	-0.168081	0.339553
P54830;P54830-2	Ptpn5	1.08964	0.132937	1.22937	0.134523	1.09644	0.0529059	1.23617	0.0718635
P55012	Slc12a2	2.49609	0.00939901	2.44662	0.00476525	2.23531	0.00526558	2.18584	0.00106247
P55066	Ncan	0.195497	0.425449	-0.329219	0.127694	0.185206	0.466012	-0.339509	0.138532
P55088;P55088-2;P55088-3	Aqp4	2.06944	0.00277144	1.76453	0.00758139	1.65033	0.0020773	1.34542	0.008986
P55096	Abcd3	0.882945	0.0336653	0.889127	0.0296887	0.320808	0.177022	0.32699	0.147797
P55258	Rab8a	0.74415	0.423817	0.915749	0.354649	0.952682	0.14388	1.12428	0.12738
P55264;P55264-2	Adk	0.4688	0.209474	0.878064	0.00944462	0.648719	0.12856	1.05798	0.00971796
P55288	Cdh11	3.97194	0.0027607	3.33274	0.00939867	3.96549	0.00258677	3.32629	0.00902096
P55821	Stmn2	4.80523	0.0108967	5.1078	5.02023e-05	4.027	0.019058	4.32957	4.67523e-05
P55849;P55849-2	Dsc1	-2.78689	0.271181	-1.21812	0.175567	-2.71626	0.282096	-1.14749	0.199406
P55850;P55850-2	Dsc3	-2.4813	0.297378	-0.156226	0.870509	-2.49447	0.271435	-0.169397	0.786317
P56135	Atp5mf	1.11614	0.0262005	1.13595	0.0257839	0.878022	0.00108756	0.89783	0.00151565
P56371	Rab4a	1.17061	0.305293	1.41287	0.073292	0.428098	0.688636	0.670358	0.311781
P56375	Acyp2	0.20456	0.741752	-0.182038	0.799368	0.235251	0.68718	-0.151347	0.824484
P56376	Acyp1	0.954359	0.0895219	1.15306	0.103648	0.4666	0.296928	0.665305	0.269676
P56379	Atp5mj	0.880725	0.0166772	0.769144	0.0446299	0.902507	0.0126304	0.790926	0.0365275
P56380	Nudt2	1.77164	0.0995051	0.530055	0.149479	1.66053	0.105463	0.41894	0.0895069
P56387	Dynlt3	0.953688	0.162499	0.718097	0.0484266	0.703009	0.269433	0.467418	0.118131
P56391	Cox6b1	-0.0983251	0.714436	-0.335757	0.240312	-0.0366669	0.744223	-0.274099	0.0357378
P56395	Cyb5a	0.800015	0.673006	1.29749	0.243445	-0.287746	0.894665	0.209726	0.88835
P56399	Usp5	0.039257	0.386151	0.179313	0.0493486	0.0241585	0.738765	0.164214	0.122477
P56480	Atp5f1b	-0.333327	0.0599814	-0.296395	0.0905165	-0.412507	0.0136621	-0.375575	0.0232141
P56528	Cd38	0.737406	0.350635	1.37387	0.198203	-0.506297	0.559766	0.130165	0.899805
P56546;P56546-2	Ctbp2	0.471629	0.17302	0.432501	0.0767534	-0.565493	0.430864	-0.604622	0.37629
P56564	Slc1a3	1.62997	0.0168556	1.80584	0.00784396	1.47476	0.0168821	1.65064	0.00678802
P56695	Wfs1	1.02652	0.0201519	1.28303	0.0101684	0.378051	0.413609	0.634567	0.203929
P56818	Bace1	1.38182	0.147916	0.258803	0.875676	1.11983	0.230943	-0.00318527	0.998472
P56959	Fus	-0.810099	0.0606513	-0.449505	0.101208	-0.558124	0.161281	-0.19753	0.438799
P57722;P57722-2	Pcbp3	0.584025	0.515365	0.994769	0.0516921	0.647861	0.509197	1.0586	0.106967
P57746	Atp6v1d	-0.427638	0.142622	-0.0966037	0.679956	-0.743073	0.0144117	-0.412039	0.0579414
P57759	Erp29	-0.343067	0.089579	-0.150218	0.149239	-0.522652	0.0318802	-0.329803	0.0280244
P57776-3	Eef1d	-0.499435	0.342632	-0.292443	0.237114	-0.466957	0.378017	-0.259966	0.31384
P57780	Actn4	-0.885323	0.157595	-0.151112	0.511513	-0.693925	0.235386	0.0402864	0.830993
P58021	Tm9sf2	0.273348	0.764626	1.06881	0.0799893	-0.0712376	0.936856	0.72422	0.177522
P58044	Idi1	-0.595869	0.382523	-0.282289	0.565457	-0.209879	0.699041	0.103701	0.74565
P58158	B3gat3	1.07396	0.246723	1.65208	0.110111	0.393074	0.558299	0.971199	0.201141
P58196	Plscr4	0.339371	0.719319	0.319103	0.704596	-0.338531	0.537874	-0.358799	0.303918
P58252	Eef2	-1.48896	0.225582	-0.140516	0.267451	-1.31187	0.275013	0.0365747	0.69869
P58281;P58281-2	Opa1	-0.173699	0.234057	-0.350932	0.0919457	-0.0996342	0.36255	-0.276867	0.117142
P58389	Ptpa	-0.0200914	0.916396	-0.0665328	0.611947	0.297735	0.0981045	0.251294	0.00307007
P58390	Kcnn2	1.53514	0.114237	1.53379	0.100955	0.797595	0.296802	0.796245	0.267994
P58404;P58404-2	Strn4	1.4039	0.303104	1.20524	0.122257	-1.11068	0.596952	-1.30935	0.471379
P58406	Hrh3	2.66558	0.0415583	3.9285	0.0165783	2.05291	0.0109584	3.31583	0.00575168
P58771;P58771-2	Tpm1	-1.41564	0.583166	-0.389319	0.666525	-1.2248	0.614125	-0.198484	0.559111
P58774;P58774-2	Tpm2	-1.20806	0.477265	-0.388446	0.415038	-0.929891	0.5711	-0.110274	0.718387
P58802	Tbc1d10a	4.29293	0.00453272	5.72296	0.00258075	3.80159	0.000439518	5.23162	0.00066896
P58854	Tubgcp3	0.385626	0.556827	-0.28272	0.660345	1.25586	0.148202	0.58751	0.446969
P58871	Tnks1bp1	2.54004	0.0560492	2.28189	0.0106063	2.0676	0.0704076	1.80945	0.00169035
P58873	Rhbdl3	2.04915	0.0317745	1.97961	0.0795044	0.946692	0.240418	0.877148	0.379057
P59016	Vps33b	2.21558	0.0249278	1.36755	0.0177679	1.9112	0.0421743	1.06317	0.0487289
P59017	Bcl2l13	1.6878	0.0539044	1.26748	0.0245774	1.23042	0.121793	0.810102	0.0922205
P59041	Dnajc30	0.686385	0.451753	0.14313	0.739276	0.25079	0.773057	-0.292466	0.481538
P59108	Cpne2	0.663737	0.222424	0.172859	0.570255	0.553662	0.311501	0.0627842	0.849048
P59279	Rab2b	0.472074	0.564346	0.780609	0.367281	0.167041	0.81703	0.475575	0.531017
P59281;P59281-2	Arhgap39	2.99339	0.0186682	3.56772	0.00315906	2.55394	0.0140577	3.12826	0.000377976
P59325	Eif5	0.729901	0.166671	1.01306	0.0814536	0.753483	0.123107	1.03664	0.057364
P59326;Q8BYK6;Q8BYK6-2;Q8BYK6-3;Q91YT7	Ythdf1;Ythdf2;Ythdf3	-0.260511	0.812989	1.73809	0.131112	0.284149	0.626352	2.28275	0.000991747
P59328;P59328-2;P59328-3	Wdhd1	-0.785297	0.219856	-0.910774	0.164637	-0.824436	0.0239929	-0.949912	0.0130294
P59644	Inpp5j	1.83234	0.100662	0.536233	0.188624	1.6777	0.118521	0.381588	0.268631
P59648	Fxyd7	1.38871	0.0330846	1.97729	0.0106423	1.12034	0.00606749	1.70892	0.00138798
P59759	Mrtfb	-1.43601	0.238245	-0.158924	0.458988	-1.39283	0.255763	-0.11574	0.679574
P59764;P59764-2	Dock4	0.762091	0.0284023	0.979866	0.0992352	0.582616	0.0398939	0.80039	0.144934
P59823	Il1rapl1	1.14609	0.158941	0.705003	0.494439	0.867952	0.232909	0.426864	0.662625
P59999	Arpc4	-0.295178	0.429159	0.175615	0.0883493	-0.477448	0.219465	-0.00665474	0.846078
P60122	Ruvbl1	-0.0895923	0.857216	0.536987	0.288258	-0.215005	0.591351	0.411574	0.283603
P60202	Plp1	1.65141	0.0258338	1.61225	0.00918369	1.2182	0.049666	1.17904	0.0141897
P60229	Eif3e	1.21248	0.0131916	2.00196	0.00627456	1.31853	0.00290028	2.10802	0.00287245
P60330	Espl1	0.517121	0.68925	-0.139319	0.943415	-0.837934	0.612783	-1.49437	0.510707
P60335	Pcbp1	0.151126	0.133231	0.312705	0.00768525	0.156705	0.0939018	0.318284	0.00344899
P60469	Ppfia3	2.09328	0.0205977	2.53639	0.0127971	2.00754	0.00103892	2.45065	0.00117195
P60487	Pdxp	-0.419522	0.0461409	-0.392265	0.00225995	-0.146872	0.360319	-0.119616	0.0499535
P60521	Gabarapl2	0.38739	0.749786	-0.260976	0.834888	1.22853	0.274464	0.580162	0.598863
P60603	Romo1	1.6301	0.220721	0.186345	0.437493	1.45465	0.261373	0.0108916	0.944713
P60670;P60670-2	Nploc4	-0.163154	0.807386	0.796484	0.622795	0.285702	0.60322	1.24534	0.439062
P60710;P63260	Actb;Actg1	-0.594671	0.0927456	-0.108342	0.523758	-0.199735	0.435267	0.286593	0.0113068
P60764	Rac3	1.03019	0.0721793	0.837425	0.0630648	0.501505	0.302773	0.308738	0.399772
P60766	Cdc42	0.378302	0.0891633	0.552136	0.040088	0.36385	0.000573878	0.537683	0.00272709
P60766-1	Cdc42	0.406651	0.0701618	0.636663	0.0319198	0.298227	0.00842107	0.52824	0.0127219
P60843	Eif4a1	-1.86245	0.144783	-0.408523	0.468098	-1.59432	0.17783	-0.140385	0.737895
P60867	Rps20	0.326934	0.775061	-0.13905	0.719897	0.534384	0.629064	0.0683994	0.728957
P60879	Snap25	4.44973	0.0031838	5.79615	0.000777047	3.97005	0.00164601	5.31648	0.000232824
P60879-2	Snap25	4.21124	0.0044095	4.95521	0.00418132	3.81847	0.000362318	4.56243	0.00112356
P60904	Dnajc5	2.37911	0.0178353	3.51956	0.0108513	2.17178	0.0065199	3.31223	0.00667492
P61021	Rab5b	0.680462	0.521348	0.630882	0.0967013	0.321762	0.75243	0.272182	0.300632
P61022	Chp1	1.01132	0.291653	0.673771	0.416622	0.77596	0.224409	0.438409	0.323565
P61027	Rab10	0.883493	0.0385067	1.24662	0.00576131	0.419331	0.148542	0.782459	0.00729534
P61028	Rab8b	2.33581	0.00550256	1.3351	0.0157009	1.68035	0.0228077	0.679642	0.147954
P61079;P62838	Ube2d2;Ube2d3	-0.191618	0.22029	-0.304665	0.147038	-0.0113761	0.95673	-0.124423	0.608247
P61080	Ube2d1	1.16701	0.428032	0.195627	0.704777	0.908426	0.512158	-0.0629559	0.829385
P61082	Ube2m	0.104052	0.723192	0.473283	0.0196365	0.0839589	0.756577	0.45319	0.00282454
P61087	Ube2k	-0.777329	0.0164255	-0.37855	0.0910696	-0.401114	0.0395293	-0.00233396	0.981308
P61089	Ube2n	-0.0585168	0.581205	-0.153964	0.0997891	-0.196212	0.1592	-0.29166	0.0345624
P61161	Actr2	0.546577	0.0331338	0.913001	0.00587919	0.529071	0.00845411	0.895495	0.00117865
P61164	Actr1a	-0.294032	0.214786	-0.21946	0.396864	-0.0343723	0.86309	0.0402006	0.864327
P61202;P61202-2	Cops2	2.18345	0.0851935	1.1189	0.0986092	1.65315	0.155061	0.58861	0.299549
P61205;P84078	Arf1;Arf3	1.92486	0.0198349	2.28134	0.0076976	1.40405	0.00796047	1.76053	0.000544023
P61211	Arl1	0.0103884	0.992603	3.56641	0.0133048	-0.631882	0.5735	2.92414	0.0230373
P61222	Abce1	0.0317831	0.9546	-0.341118	0.0229201	-0.109796	0.862383	-0.482697	0.176654
P61226	Rap2b	1.17703	0.033464	1.48431	0.0309438	0.561982	0.065554	0.869268	0.065918
P61255	Rpl26	0.875062	0.153608	1.43087	0.0230271	0.432808	0.369499	0.988613	0.0325848
P61264	Stx1b	2.73167	0.00455718	3.02303	0.00224962	2.42377	0.00145306	2.71512	0.000367211
P61294	Rab6b	1.32561	0.0155196	1.73021	0.00292066	0.900144	0.0279297	1.30474	0.00223506
P61358	Rpl27	2.20916	0.0266868	1.67325	0.0466671	1.45342	0.0456964	0.917507	0.101216
P61514	Rpl37a	0.301307	0.203394	0.532677	0.0102493	0.103858	0.69946	0.335227	0.155771
P61620	Sec61a1	-0.457805	0.758662	0.735535	0.296452	-1.56447	0.31465	-0.371126	0.531304
P61622	Itga11	-0.84613	0.373417	0.049612	0.960001	-0.87864	0.115251	0.0171016	0.978064
P61750	Arf4	2.73377	0.129367	1.47327	0.0546143	2.53433	0.148431	1.27383	0.0644993
P61804	Dad1	0.584965	0.358615	1.11281	0.019545	-0.0302362	0.957024	0.497611	0.0819342
P61807	Snn	2.28534	0.0730739	2.62173	0.0688709	1.51402	0.210077	1.85041	0.174772
P61922	Abat	-0.20301	0.371655	-0.385879	0.0665309	-0.0542863	0.787915	-0.237155	0.157025
P61924	Copz1	1.80854	0.081827	2.32147	0.00071147	1.03282	0.27028	1.54575	0.00839267
P61957;Q9Z172;Q9Z172-2	Sumo2;Sumo3	-0.192454	0.710635	-0.0740334	0.725488	-0.0201298	0.967381	0.0982908	0.519284
P61963	Dcaf7	0.773459	0.352453	0.249439	0.71018	-0.808307	0.542974	-1.33233	0.312426
P61967	Ap1s1	1.36218	0.477517	2.66987	0.119037	3.04821	0.0637179	4.35589	0.000806595
P61971	Nutf2	-0.768248	0.658275	-0.266883	0.801445	-0.414894	0.815297	0.0864716	0.939825
P61979;P61979-2;P61979-3	Hnrnpk	-0.239477	0.369791	-0.0236149	0.892419	-0.256452	0.301217	-0.0405897	0.773389
P61982	Ywhag	-0.501698	0.0981051	-0.351584	0.122863	-0.250034	0.314203	-0.0999203	0.563556
P62069	Usp46	1.31611	0.385724	0.0102396	0.968466	1.5588	0.312244	0.252934	0.317865
P62071	Rras2	0.269322	0.746456	0.880023	0.233776	0.833186	0.536118	1.44389	0.275572
P62082	Rps7	0.0161597	0.981775	0.75082	0.110656	-0.0771144	0.904205	0.657545	0.0487021
P62137	Ppp1ca	-0.0967712	0.370161	0.121743	0.369284	0.0216592	0.837062	0.240173	0.121837
P62141	Ppp1cb	-0.334858	0.259728	-0.0700912	0.428169	-0.0939318	0.732372	0.170835	0.106839
P62192	Psmc1	-1.05875	0.460478	0.359955	0.437491	-1.41024	0.316685	0.00846863	0.939744
P62196	Psmc5	-1.00383	0.15827	-0.506712	0.112972	-0.824674	0.210245	-0.32756	0.144805
P62242	Rps8	-0.234288	0.456372	0.000332514	0.998357	-0.433641	0.17733	-0.199021	0.149156
P62245	Rps15a	-0.108049	0.827815	0.46638	0.0839538	-0.410886	0.408173	0.163543	0.341541
P62259	Ywhae	-0.239105	0.179677	-0.244942	0.150133	-0.17858	0.164244	-0.184416	0.113633
P62264	Rps14	-1.00997	0.112727	-0.311883	0.120294	-0.447475	0.42078	0.250607	0.194075
P62267	Rps23	0.583781	0.238699	1.03719	0.0210718	0.34249	0.40389	0.795903	0.0137555
P62270	Rps18	-0.57794	0.28089	-0.313394	0.180774	-0.60766	0.29877	-0.343114	0.295965
P62281	Rps11	0.104695	0.792335	0.81376	0.0102777	-0.160577	0.702768	0.548489	0.0640951
P62301	Rps13	0.275308	0.414723	0.0361099	0.856251	0.0218239	0.955451	-0.217374	0.479943
P62305	Snrpe	-0.356183	0.784385	0.456462	0.640766	-0.0386159	0.976223	0.774028	0.441233
P62307	Snrpf	-0.492247	0.486696	-0.312548	0.566419	-0.688714	0.309924	-0.509014	0.306274
P62309	Snrpg	1.54759	0.390296	3.20684	0.00404869	0.588587	0.720625	2.24784	0.00074364
P62311	Lsm3	-0.662574	0.698224	1.00253	0.115499	-1.72199	0.354144	-0.056879	0.934847
P62315	Snrpd1	0.152127	0.833569	0.547948	0.0701106	-0.430902	0.565753	-0.0350809	0.896902
P62317	Snrpd2	-0.173992	0.730024	0.283911	0.644099	-0.246811	0.734364	0.211093	0.792424
P62320	Snrpd3	-1.40972	0.129346	-0.66986	0.137738	-1.02699	0.237774	-0.287131	0.473896
P62331	Arf6	0.802558	0.368532	1.59163	0.0226021	0.831105	0.299139	1.62017	0.00211566
P62334	Psmc6	-0.491912	0.107434	0.126225	0.34418	-0.46492	0.173032	0.153217	0.465291
P62342	Selenot	1.63138	0.153604	0.804447	0.404924	0.627834	0.484167	-0.1991	0.801818
P62482	Kcnab2	0.153835	0.373306	0.192179	0.401266	0.101019	0.436332	0.139364	0.47966
P62484	Abi2	1.27807	0.041458	1.73109	0.0183898	0.983775	0.00660007	1.43679	0.00332013
P62631	Eef1a2	0.328848	0.178857	0.275109	0.161282	0.304906	0.113167	0.251167	0.0451622
P62702	Rps4x	-0.377868	0.543096	-0.282903	0.288618	-0.58036	0.380996	-0.485395	0.156569
P62717	Rpl18a	0.370965	0.189646	0.54091	0.175152	0.165326	0.544591	0.335271	0.379319
P62737	Acta2	0.567942	0.0742639	-0.187818	0.320823	0.663797	0.0689772	-0.0919622	0.683126
P62743	Ap2s1	1.35921	0.0181043	1.68014	0.0120331	1.03555	0.00252547	1.35649	0.00346993
P62746	Rhob	0.674936	0.0178033	0.707151	0.021709	0.609186	0.000380077	0.641402	0.00319653
P62748	Hpcal1	0.465592	0.402931	0.635461	0.297153	0.672145	0.0194331	0.842015	0.0297972
P62751	Rpl23a	0.109126	0.780805	0.393619	0.164178	-0.206409	0.673517	0.078084	0.836673
P62754	Rps6	-0.938752	0.176345	-0.658171	0.214444	-0.581808	0.371334	-0.301227	0.543342
P62761	Vsnl1	1.62414	0.0105755	1.79621	0.0074202	1.45316	0.000713681	1.62523	0.000456761
P62774	Mtpn	0.38749	0.327683	0.974169	0.14739	0.469223	0.473801	1.0559	0.219502
P62806	H4c1	-1.08336	0.221639	-0.693317	0.228781	-0.819222	0.342197	-0.429178	0.444342
P62812	Gabra1	1.58978	0.0119228	2.01532	0.00560513	1.42896	0.00954445	1.8545	0.00420703
P62814	Atp6v1b2	-0.221875	0.125353	-0.170022	0.236085	-0.12471	0.150128	-0.0728569	0.422145
P62821	Rab1A	0.689548	0.0123941	0.911065	0.0153403	0.207983	0.035413	0.429499	0.0662959
P62823	Rab3c	0.91481	0.157335	1.17252	0.0293576	0.710525	0.16691	0.968233	0.00355386
P62827	Ran	-0.161494	0.591512	0.118029	0.555488	-0.320382	0.252353	-0.0408592	0.750063
P62830	Rpl23	-0.242592	0.882514	0.870906	0.519569	1.25047	0.268513	2.36397	0.00170976
P62835	Rap1a	0.14861	0.556985	0.55438	0.0550429	0.0621281	0.662806	0.467898	0.00407112
P62849;P62849-2;P62849-3	Rps24	0.764908	0.0488744	1.08079	0.00722956	0.614731	0.108635	0.930615	0.0192633
P62858	Rps28	-0.624258	0.227995	-0.187647	0.5923	-0.326362	0.466841	0.110249	0.710903
P62862	Fau	-1.06929	0.237768	-0.558887	0.409878	-0.747999	0.423933	-0.237601	0.749382
P62869	Elob	1.2402	0.310955	1.35121	0.26272	0.739329	0.525838	0.850332	0.456429
P62874	Gnb1	-0.2449	0.225359	-0.263904	0.172649	0.0502777	0.59969	0.0312742	0.642716
P62878	Rbx1	1.62467	0.276956	0.937638	0.427044	1.48571	0.304842	0.798678	0.480158
P62880	Gnb2	-0.315818	0.0311545	-0.240914	0.0628308	-0.113912	0.102132	-0.0390085	0.468972
P62881;P62881-2	Gnb5	1.73641	0.00568592	1.97468	0.00287843	1.46746	0.00261887	1.70573	0.000897652
P62889	Rpl30	-0.0775649	0.773427	-0.0472234	0.836235	-0.24729	0.254483	-0.216948	0.171874
P62897	Cycs	-0.0785561	0.746639	-0.0632127	0.799766	0.308125	0.0143371	0.323469	0.0243849
P62908	Rps3	-0.513957	0.315412	0.279033	0.283014	-0.68803	0.186154	0.10496	0.610264
P62911	Rpl32	-0.943997	0.423076	-0.583981	0.472893	-0.240096	0.843255	0.11992	0.894337
P62918	Rpl8	-0.19503	0.744817	0.389345	0.512518	-0.153307	0.794494	0.431067	0.464475
P62962	Pfn1	0.394382	0.0889435	0.50275	0.0466149	0.119144	0.298982	0.227512	0.0864648
P62983	Rps27a	0.488983	0.283445	0.876001	0.00488065	0.326397	0.444378	0.713415	0.00509217
P63001	Rac1	0.48488	0.0409036	0.704796	0.0152128	0.462098	0.00669414	0.682013	0.00310552
P63005	Pafah1b1	-0.210866	0.339493	-0.0196196	0.906359	-0.257856	0.193361	-0.0666097	0.602552
P63011	Rab3a	0.914296	0.026092	1.07366	0.00528824	0.624678	0.0624789	0.78404	0.00887847
P63017	Hspa8	-0.475262	0.0370589	-0.273724	0.0761957	-0.362829	0.0493198	-0.161291	0.112029
P63024	Vamp3	1.98468	0.0859674	1.90252	0.159584	2.07084	0.00502565	1.98869	0.0603689
P63028	Tpt1	-0.331235	0.0120097	-0.323673	0.00724988	-0.428137	0.00406974	-0.420575	0.00215989
P63030	Mpc1	0.28318	0.890424	-0.819037	0.601403	1.88099	0.215852	0.778775	0.00101376
P63037	Dnaja1	0.932652	0.5566	0.708211	0.657838	1.38713	0.0506385	1.16269	0.113437
P63038	Hspd1	-0.466361	0.0828393	-0.447687	0.0852703	-0.476123	0.0126508	-0.457448	0.0100817
P63040	Cplx1	2.90649	0.00877314	3.00756	0.00650805	2.58097	0.00767935	2.68204	0.00520976
P63044	Vamp2	1.25056	0.0525408	1.60422	0.0282946	0.999802	0.0202955	1.35346	0.0106516
P63046;P63046-2	Sult4a1	0.781656	0.494707	-0.0682983	0.767805	0.979296	0.393902	0.129341	0.34463
P63054	Pcp4	0.995804	0.336045	0.941661	0.364293	-0.364477	0.769698	-0.418619	0.738692
P63073	Eif4e	-0.317822	0.80125	1.54227	0.220757	-1.21565	0.38483	0.644449	0.600869
P63080	Gabrb3	3.04418	0.0257695	2.72935	0.0375356	2.60257	0.043473	2.28775	0.0646951
P63082	Atp6v0c	1.78265	0.0281032	2.27693	0.00859567	1.60241	0.00525993	2.0967	0.000238685
P63085	Mapk1	-0.140075	0.0299165	-0.123259	0.356254	-0.206388	0.00177704	-0.189572	0.171324
P63087;P63087-2	Ppp1cc	0.0365321	0.851591	0.435153	0.128004	0.294379	0.18933	0.693	0.0393606
P63094;P63094-3;Q6R0H7	Gnas	0.74932	0.00331361	0.790156	0.0210973	0.718658	0.00382492	0.759494	0.0238889
P63101	Ywhaz	-0.321333	0.199411	-0.129522	0.282826	-0.242322	0.330302	-0.050511	0.701472
P63115	Slc7a10	0.808237	0.295727	0.737537	0.150387	-0.0753021	0.907766	-0.146002	0.656674
P63137-2	Gabrb2	4.52824	0.0143212	5.08427	0.00113714	4.17014	0.0165531	4.72616	0.000888409
P63141	Kcna2	3.79018	0.00526464	4.56494	0.00127377	2.85838	0.00943969	3.63313	0.00149872
P63143	Kcnab1	0.945127	0.145633	1.20223	0.0706246	0.462097	0.636716	0.719199	0.462926
P63158	Hmgb1	1.69076	0.253549	0.0499481	0.772137	1.42683	0.327926	-0.213989	0.424815
P63168	Dynll1	-0.050381	0.935178	-0.401753	0.565912	0.0298052	0.952634	-0.321567	0.586847
P63216	Gng3	1.18873	0.377886	0.867425	0.485012	-0.391325	0.67792	-0.712629	0.409695
P63242	Eif5a	-0.0554819	0.807091	0.363186	0.17825	0.459773	0.0255046	0.87844	0.00402885
P63250	Kcnj3	2.10976	0.107466	2.40884	0.0636262	1.97662	0.124177	2.2757	0.0735457
P63318	Prkcg	0.328845	0.0715612	0.46008	0.0161683	0.192214	0.256132	0.323449	0.0633454
P63321	Rala	1.57044	0.0647329	2.41328	0.00719538	1.27863	0.0580614	2.12148	0.00161616
P63323	Rps12	-0.34078	0.209844	-0.194474	0.416552	0.17437	0.401428	0.320676	0.130784
P63325	Rps10	-0.907392	0.141905	-0.516646	0.118936	-0.989203	0.0962117	-0.598458	0.0255277
P63328	Ppp3ca	0.604769	0.0250477	0.77146	0.0159525	0.565701	0.00647008	0.732393	0.00590065
P63330	Ppp2ca	0.0175635	0.893439	0.107141	0.524267	0.201192	0.106078	0.29077	0.0951107
P67778	Phb1	-0.0461292	0.870648	0.389785	0.0601771	-0.225529	0.413388	0.210385	0.139016
P67871	Csnk2b	0.0496	0.754164	-0.28814	0.236201	0.375146	0.0805794	0.037406	0.871336
P67984	Rpl22	-0.806489	0.356766	-0.193582	0.582978	-1.0251	0.259784	-0.412196	0.291746
P68037	Ube2l3	0.208579	0.511893	-0.0972071	0.599278	-0.173116	0.691818	-0.478902	0.221984
P68040	Rack1	-0.705317	0.145916	-0.143173	0.354024	-0.68884	0.144206	-0.126697	0.273478
P68181;P68181-2;P68181-3;P68181-4	Prkacb	0.617828	0.0221241	0.947801	0.0590789	0.49832	0.010508	0.828294	0.0705579
P68254;P68254-2	Ywhaq	-0.102809	0.432434	-0.230944	0.115455	0.179538	0.14381	0.051403	0.619649
P68368	Tuba4a	-0.268312	0.169914	-0.157408	0.310247	-0.0356388	0.769383	0.0752652	0.368496
P68372	Tubb4b	-0.153868	0.455158	-0.404758	0.0847831	0.0792542	0.524538	-0.171636	0.157604
P68373	Tuba1c	-0.411648	0.0760633	-0.209234	0.266188	-0.234914	0.0456153	-0.0325006	0.586882
P68404-2	Prkcb	0.439264	0.111265	0.787036	0.0270186	0.463319	0.00257938	0.81109	0.00165324
P68510	Ywhah	-0.344711	0.0902205	-0.143442	0.354655	-0.250628	0.136655	-0.049359	0.687093
P69566;P69566-2	Ranbp9	-0.57188	0.361354	-0.152111	0.863324	0.15893	0.777483	0.578699	0.514088
P70124	Serpinb5	-2.98049	0.260006	-0.992406	0.345391	-2.44962	0.326938	-0.461531	0.554391
P70168	Kpnb1	0.16079	0.364329	0.262507	0.0840812	0.508034	0.013604	0.609751	0.000374292
P70170;P70170-2;P70170-3	Abcc9	0.475892	0.803064	2.3065	0.00722194	-0.0226183	0.99051	1.80799	0.0173964
P70174	Hrh1	-0.415413	0.646417	0.156231	0.807586	-0.0636002	0.933798	0.508043	0.290696
P70175	Dlg3	0.791907	0.016172	0.939873	0.022672	0.573337	0.004373	0.721303	0.0212666
P70188;P70188-2	Kifap3	1.63611	0.0460839	1.49438	0.0716955	1.0089	0.146792	0.867167	0.224165
P70195	Psmb7	-1.63727	0.13834	1.59145	0.405659	-1.43428	0.183151	1.79445	0.354952
P70202	Lxn	0.299594	0.111638	0.255944	0.1124	0.16333	0.642402	0.119679	0.724745
P70205	Adcyap1r1	2.88578	0.125199	1.67851	0.00753734	2.75951	0.134805	1.55224	0.0036274
P70206	Plxna1	1.85192	0.00575935	1.93361	0.00576056	1.46543	0.000406111	1.54712	0.000806057
P70207	Plxna2	0.746491	0.0471563	0.319578	0.797267	1.09506	0.00501986	0.668148	0.592608
P70208;P70208-2	Plxna3	-2.82306	0.403715	-1.85543	0.136182	-2.25905	0.482448	-1.29142	0.0998896
P70211;P70211-2;P70211-3	Dcc	2.76379	0.0262662	2.53482	0.00768786	2.56145	0.0181387	2.33248	0.000593963
P70232	Chl1	0.717538	0.0263848	0.931361	0.00710768	0.534655	0.0403074	0.748477	0.00727309
P70236	Map2k6	0.200437	0.454377	1.06142	0.247648	0.387425	0.00460924	1.24841	0.17116
P70255;P70255-2;P70255-3;P70255-4;P70255-5;P70255-6;P70255-7;P70257;P70257-1;P70257-2;P97863;P97863-2;P97863-3;Q02780;Q02780-2;Q02780-3;Q02780-4;Q02780-5;Q02780-6;Q02780-7	Nfia;Nfib;Nfic;Nfix	0.552757	0.240027	1.22492	0.201428	-0.325526	0.355873	0.346638	0.67262
P70261	Pald1	0.134082	0.80045	0.81434	0.247533	-1.19802	0.0160211	-0.517763	0.316875
P70265;Q6DTY7;Q6DTY7-2;Q6DTY7-5;Q6DTY7-6	Pfkfb2;Pfkfb4	0.967104	0.303041	0.96852	0.28501	0.665902	0.245445	0.667317	0.196626
P70268;P70268-2	Pkn1	1.71146	0.111977	1.24803	0.215229	1.29941	0.0253144	0.835989	0.0966852
P70280	Vamp7	2.30886	0.0212565	3.16584	0.0195391	1.98852	0.0128426	2.8455	0.01716
P70290	Mpp1	2.47571	0.0160035	2.80883	0.0153607	2.07899	0.000871653	2.41211	0.00346278
P70296	Pebp1	0.203089	0.452836	0.0240898	0.88858	0.329659	0.236188	0.15066	0.370413
P70297	Stam	0.59443	0.295624	1.1902	0.0349325	0.379989	0.339687	0.975763	0.00287332
P70302	Stim1	3.3488	0.0192946	4.01304	0.0123632	3.14596	0.000792348	3.81021	0.0010056
P70303-3	Ctps2	2.85083	0.000120764	-0.194537	0.30517	2.19927	0.0196043	-0.846099	0.215177
P70318	Tial1	-0.760906	0.288511	-0.202047	0.62963	-0.91354	0.218398	-0.354681	0.418825
P70333	Hnrnph2	-1.22729	0.190996	-0.893602	0.273395	-0.468072	0.300699	-0.134381	0.54876
P70336;P70336-2	Rock2	1.13824	0.0111554	1.25215	0.0127195	1.03927	5.12395e-05	1.15318	0.00162616
P70345;P70345-2	Bcl2l2	3.03044	0.00240095	2.87823	0.00202595	2.92221	0.000247667	2.77	4.58654e-05
P70349	Hint1	0.286594	0.428429	0.289989	0.522354	0.406331	0.0677827	0.409725	0.248556
P70372	Elavl1	-0.0205933	0.953422	0.0737562	0.484568	-0.151675	0.671579	-0.0573254	0.591815
P70392	Rasgrf2	0.217945	0.19418	0.345035	0.0720365	0.300634	0.0619668	0.427724	0.0232132
P70398	Usp9x	0.945618	0.00761287	0.983494	0.00672216	0.771837	0.00546277	0.809713	0.00472094
P70404	Idh3g	-0.297464	0.260036	-0.236828	0.346441	-0.193408	0.096428	-0.132773	0.157689
P70414	Slc8a1	3.39702	0.00986749	3.87745	0.00405634	2.9772	0.00295631	3.45763	0.000396582
P70423	Slc7a3	3.79433	0.00354448	3.83732	0.00469375	2.82707	0.00165581	2.87005	0.00342781
P70441	Slc9a3r1	-0.0628913	0.698768	-0.120769	0.471261	0.085413	0.352417	0.0275358	0.755822
P70452	Stx4	0.572306	0.378743	0.374759	0.51988	0.250348	0.674404	0.0528008	0.921604
P70663	Sparcl1	-0.0763537	0.849942	-0.00707213	0.987993	0.414948	0.0691351	0.484229	0.162478
P70670;Q60817	Naca	-1.0643	0.340999	1.33845	0.317456	-1.54143	0.196688	0.861319	0.506442
P70677	Casp3	0.264014	0.836443	0.19398	0.881281	2.86662	3.57947e-05	2.79658	0.00044941
P70689	Gjb6	2.65494	0.100504	2.80745	0.0548322	3.44999	0.018517	3.6025	0.00354258
P70698	Ctps1	1.14645	0.454637	0.322162	0.122244	0.850226	0.573088	0.0259361	0.889355
P70699	Gaa	0.00784556	0.955611	0.0836388	0.547222	0.0671352	0.71156	0.142928	0.435456
P70704-2	Atp8a1	2.42355	0.00802286	2.459	0.00444382	2.10375	0.00378496	2.1392	0.000882348
P80313	Cct7	-0.295827	0.0430069	-0.20516	0.0674197	-0.168381	0.173219	-0.0777143	0.402669
P80314	Cct2	-0.255993	0.227161	-0.275677	0.0669598	-0.30235	0.138343	-0.322034	0.0170773
P80315	Cct4	-0.416384	0.0565039	-0.229015	0.0306806	-0.179195	0.322761	0.0081749	0.918524
P80316	Cct5	-0.107427	0.745752	0.117053	0.748434	0.0832227	0.653469	0.307702	0.240732
P80317	Cct6a	-0.452623	0.0456852	-0.312021	0.0431219	-0.307478	0.073585	-0.166876	0.0330085
P80318	Cct3	-0.441989	0.0549171	-0.356711	0.0765708	-0.194649	0.09866	-0.109372	0.148685
P80560	Ptprn2	1.59054	0.0269336	1.12626	0.0123136	1.00121	0.0722649	0.536924	0.0203104
P81122	Irs2	2.0141	0.033092	1.65265	0.0398122	1.21069	0.111823	0.849244	0.170995
P83510	Tnik	2.07408	0.014331	4.02348	0.00514849	1.7626	0.00273285	3.712	0.00322315
P83741;P83741-2;P83741-3;P83741-4;P83741-5	Wnk1	1.20843	0.273456	0.572435	0.0650495	1.40366	0.216668	0.767661	0.0360739
P83882	Rpl36a	-0.213264	0.636554	0.0112406	0.970646	-0.322008	0.559377	-0.0975033	0.821747
P83940	Eloc	-0.278795	0.269535	-0.220702	0.330891	-0.284511	0.201493	-0.226418	0.241512
P84075	Hpca	1.5115	0.129428	0.707422	0.23589	0.662284	0.430665	-0.141794	0.767333
P84084	Arf5	1.28406	0.0208819	1.83001	0.00286938	1.04464	0.0170836	1.59059	0.00072967
P84086	Cplx2	2.89175	0.0143564	2.67163	0.0135817	2.58683	0.0039705	2.36671	0.00181247
P84091	Ap2m1	0.605576	0.0303477	0.753053	0.00988777	0.392462	0.034577	0.539939	0.00392322
P84096	Rhog	0.758111	0.0218257	0.987383	0.0289498	0.945562	0.00388159	1.17483	0.0111198
P84309;P84309-2	Adcy5	2.66516	0.122678	2.30577	0.289593	3.0191	0.0683129	2.65971	0.210889
P85094	Isoc2a	-0.145977	0.500921	-0.556801	0.055629	0.0188408	0.880032	-0.391984	0.0435083
P97300	Nptn	1.50572	0.00915907	1.89997	0.00257249	1.20706	0.00639598	1.60132	0.000856047
P97315	Csrp1	-0.0550963	0.763703	-0.191509	0.212064	0.0860538	0.578474	-0.0503585	0.595763
P97318;P97318-2;P97318-8	Dab1	2.58601	0.113911	3.51321	0.057934	2.64754	0.00365343	3.57474	0.00326475
P97333	Nrp1	2.43467	0.0113316	1.24001	0.0760833	0.949595	0.190499	-0.245065	0.693698
P97350	Pkp1	-1.90156	0.552116	-0.772722	0.108871	-2.07984	0.5168	-0.951002	0.0485744
P97351	Rps3a	-0.412998	0.338757	-0.379759	0.151354	-0.208183	0.576745	-0.174945	0.272696
P97370	Atp1b3	2.06201	0.0107181	2.18272	0.0185834	1.59657	0.0259772	1.71728	0.0402504
P97371	Psme1	-0.534616	0.131123	0.699759	0.416712	-0.765444	0.0615046	0.468932	0.579578
P97379;P97379-2	G3bp2	-0.204279	0.858884	0.0559247	0.704052	-0.982846	0.479619	-0.722643	0.342129
P97384	Anxa11	-0.191443	0.902579	0.18941	0.39828	-0.38728	0.805168	-0.00642776	0.976789
P97390	Vps45	1.4401	0.00796946	1.15919	0.0763054	1.15123	0.00294314	0.870319	0.112166
P97393	Arhgap5	-0.639285	0.279523	0.204347	0.768639	-1.00027	0.16718	-0.156643	0.837413
P97411;P97411-2	Ica1	1.45209	0.0849266	1.54206	0.117429	1.37729	0.00976282	1.46725	0.0508167
P97412	Lyst	0.449482	0.442831	1.65644	0.107276	0.210043	0.840456	1.417	0.284651
P97427	Crmp1	-0.359987	0.0422155	-0.0165583	0.900303	-0.338501	0.0507135	0.00492795	0.970289
P97429	Anxa4	-1.77249	0.468638	-0.0291917	0.948414	-1.94458	0.427333	-0.201281	0.596983
P97441	Slc30a3	3.74179	0.0247131	4.48969	0.0197683	3.59008	0.0238269	4.33798	0.0192994
P97445	Cacna1a	2.67533	0.0137319	3.87175	0.00238704	2.40606	0.00760017	3.60247	0.000717506
P97447	Fhl1	0.629608	0.0220966	0.854942	0.01668	0.211833	0.149158	0.437168	0.0671189
P97467	Pam	0.526433	0.236521	0.475523	0.133658	0.438922	0.319989	0.388012	0.218196
P97470	Ppp4c	-0.19668	0.612249	0.873061	0.0331598	-0.059913	0.905507	1.00983	0.071101
P97490	Adcy8	3.21084	0.0355831	3.18818	0.00727244	2.86998	0.0284697	2.84732	0.000446103
P97492	Rgs14	1.96613	0.330022	4.19508	0.00775353	1.49205	0.437799	3.721	0.00792568
P97494	Gclc	0.554895	0.0606801	0.160112	0.424205	0.634132	0.0489794	0.239349	0.28654
P97718	Adra1a	3.71116	0.00159446	3.67614	0.000765608	3.05181	0.00132699	3.01679	0.000309381
P97742	Cpt1a	2.0102	0.11038	0.697586	0.0610066	1.79894	0.138319	0.486324	0.10392
P97765	Wbp2	0.108639	0.704525	0.421245	0.140327	-0.13945	0.559599	0.173156	0.372048
P97772	Grm1	2.83863	0.0159642	2.65491	0.0152252	2.80205	0.00583857	2.61833	0.00417472
P97789;P97789-2;P97789-3	Xrn1	0.684157	0.435786	0.447132	0.482591	-0.365092	0.584262	-0.602117	0.109824
P97792	Cxadr	2.80733	0.0533533	5.61274	0.00283973	2.61563	0.0388812	5.42104	0.00108974
P97793	Alk	0.126259	0.855451	0.0991001	0.904388	-0.901386	0.17116	-0.928544	0.247321
P97797-2	Sirpa	4.0449	0.00388986	4.95499	0.00114044	3.63629	0.00110457	4.54638	0.00010494
P97798;P97798-2;P97798-3;P97798-5	Neo1	3.22396	0.00207514	4.22574	0.0050128	2.68466	0.000495474	3.68644	0.00496913
P97807;P97807-2	Fh	-0.308891	0.173997	-0.358222	0.138168	-0.183878	0.0896331	-0.23321	0.0734507
P97813	Pld2	0.574119	0.367776	0.608697	0.371278	-0.200281	0.757927	-0.165704	0.809454
P97820	Map4k4	-0.266165	0.602789	0.575499	0.265082	-0.508988	0.491268	0.332677	0.637559
P97823;P97823-2	Lypla1	0.270686	0.260053	0.968701	0.291354	0.386278	0.0632901	1.08429	0.239434
P97858	Slc35b1	1.45136	0.106043	0.866582	0.162136	-0.230844	0.758568	-0.815623	0.185811
P97930	Dtymk	-0.252884	0.568578	-0.849466	0.0752929	-0.309533	0.270373	-0.906116	0.00277553
P97950	Rab33a	2.17075	0.0659557	2.72347	0.00431683	1.76795	0.0985714	2.32067	0.0039403
P97952	Scn1b	1.2164	0.00809292	1.3321	0.00373892	0.826109	0.0202029	0.94181	0.0074466
P98084	Apba2	-0.184892	0.747378	-0.301724	0.603831	-0.296063	0.562926	-0.412896	0.430015
P98086	C1qa	0.721461	0.212399	1.23242	0.0680367	0.347837	0.709731	0.858801	0.382173
P98195;P98195-2	Atp9b	2.58147	0.000991831	3.46967	0.000198099	1.95965	0.00251514	2.84785	0.000369722
P98200	Atp8a2	1.20811	0.0506994	2.85912	0.006644	0.814554	0.0854507	2.46556	0.00747393
P98203;P98203-2;P98203-4;P98203-5	Arvcf	-1.19849	0.685368	2.51185	0.100412	-0.8328	0.756295	2.87754	0.00102859
P99024	Tubb5	-0.273811	0.219156	-0.131787	0.344	0.0403398	0.813706	0.182364	0.0685304
P99026	Psmb4	-1.4874	0.234446	-0.206953	0.193682	-1.70654	0.184289	-0.426092	0.0417257
P99027	Rplp2	-1.11427	0.144314	-0.670649	0.295051	-0.984088	0.0580581	-0.540463	0.113844
P99028	Uqcrh	-0.482069	0.233091	-0.790798	0.0790372	-0.210049	0.24167	-0.518778	0.020183
P99029-2	Prdx5	-0.193213	0.493632	-0.35247	0.239946	-0.0206025	0.760056	-0.179859	0.0360136
Q00493	Cpe	-0.455318	0.295262	-0.248491	0.106232	-0.313841	0.44375	-0.107014	0.291128
Q00558	F8a1	-0.245577	0.601754	-0.229598	0.552002	-0.321245	0.5335	-0.305266	0.4876
Q00612	G6pdx	-0.839815	0.315237	-0.130367	0.525004	-0.849783	0.312943	-0.140334	0.531097
Q00PI9	Hnrnpul2	0.299873	0.574024	0.215716	0.512778	0.169881	0.718373	0.0857242	0.698373
Q01063;Q01063-2	Pde4d	1.42238	0.182731	0.952203	0.262792	1.41296	0.132722	0.942783	0.1692
Q01065	Pde1b	1.41993	0.0315986	1.66749	0.0103337	1.40317	0.00847303	1.65073	0.000527855
Q01097	Grin2b	1.36472	0.0113301	1.64215	0.00888588	1.23542	0.00518587	1.51285	0.00513348
Q01149	Col1a2	-0.0666914	0.904687	-0.335335	0.693088	0.322154	0.566787	0.0535107	0.948986
Q01279	Egfr	-0.166464	0.857814	-0.327114	0.717809	0.753431	0.344904	0.592782	0.425536
Q01320	Top2a	-0.79309	0.260925	-0.436613	0.261191	-1.02431	0.23909	-0.667832	0.284974
Q01338	Adra2a	-0.927372	0.239987	-0.0203441	0.98471	-0.919904	0.0359548	-0.0128756	0.987844
Q01341	Adcy6	-0.78729	0.180275	-1.19954	0.0591501	-0.187935	0.805449	-0.600181	0.437325
Q01405	Sec23a	-0.0590763	0.802317	-0.0110957	0.951781	-0.123438	0.558956	-0.0754573	0.609054
Q01768	Nme2	-0.266294	0.118779	0.917663	0.52616	-0.0772858	0.621875	1.10667	0.450362
Q01815;Q01815-2	Cacna1c	4.15376	0.00364661	5.18272	0.000769943	3.82594	0.00640978	4.8549	0.00147161
Q01853	Vcp	-0.396552	0.062725	-0.129469	0.186189	-0.317031	0.106273	-0.0499471	0.549584
Q02053	Uba1	-0.324567	0.0770664	-0.287685	0.0967104	-0.208597	0.0508816	-0.171715	0.0650198
Q02105	C1qc	1.17646	0.1422	0.67235	0.107688	1.09174	0.171358	0.587638	0.165269
Q02248	Ctnnb1	0.429579	0.105159	0.633945	0.0315949	0.450595	0.00854446	0.65496	0.00064714
Q02257	Jup	-2.59855	0.399292	-1.30825	0.0289399	-2.43856	0.423704	-1.14826	0.00887618
Q02357;Q02357-2;Q02357-4;Q02357-5;Q02357-6	Ank1	0.504748	0.240612	-0.183155	0.823861	0.49806	0.266679	-0.189843	0.819753
Q02788	Col6a2	1.15545	0.265195	-0.95242	0.271902	1.32764	0.231932	-0.780226	0.388637
Q03137	Epha4	1.92933	0.00134773	2.11802	0.00288258	1.67265	0.00125966	1.86135	0.0034262
Q03141;Q03141-3	Mark3	2.49987	0.00851325	3.51813	0.00200277	2.15302	0.00176446	3.17128	0.000180563
Q03173;Q03173-3;Q03173-4;Q03173-5;Q03173-6	Enah	0.0210854	0.983311	-0.878487	0.368269	1.13947	0.049749	0.239898	0.180258
Q03265	Atp5f1a	-0.346862	0.103533	-0.40342	0.0773578	-0.289295	0.00200745	-0.345853	0.00428341
Q03391	Grin2d	1.60375	0.130973	0.0396067	0.964793	1.62133	0.0294913	0.0571849	0.911628
Q03717	Kcnb1	1.05023	0.372874	1.37211	0.301662	1.26999	0.122821	1.59187	0.123094
Q04447	Ckb	-0.284856	0.0641414	-0.265647	0.0928004	-0.0639381	0.327873	-0.0447286	0.572023
Q04690-2	Nf1	1.96818	0.0148569	1.83015	0.00598728	1.61272	0.0111839	1.47469	0.000414019
Q04735;Q04735-2	Cdk16	2.10222	0.0834869	1.72089	0.117321	0.0784369	0.932382	-0.302902	0.728501
Q04736	Yes1	1.27955	0.0274532	3.74979	0.0779617	0.69429	0.145697	3.16454	0.117946
Q04750	Top1	-1.51774	0.0432529	-0.542168	0.573645	-1.33146	0.0742813	-0.355884	0.714729
Q04899	Cdk18	1.50882	0.17554	1.90125	0.0905712	1.49503	0.0463978	1.88745	0.00978438
Q05512	Mark2	1.32832	0.198215	1.2038	0.202587	1.11074	0.222205	0.986219	0.225161
Q05793	Hspg2	-0.131356	0.620171	-0.666006	0.0419288	0.102455	0.727475	-0.432195	0.167922
Q05816	Fabp5	-0.157256	0.550421	-0.24788	0.382894	0.259569	0.0567275	0.168945	0.244078
Q05920	Pc	-0.908287	0.0663944	-0.994764	0.0397465	-0.681949	0.0373476	-0.768426	0.00979879
Q05922-2	Dusp2	0.188473	0.816079	0.676527	0.478445	-0.355438	0.325395	0.132616	0.812896
Q05BC3;Q05BC3-2;Q05BC3-3	Eml1	-0.181271	0.690938	0.0352345	0.942039	-0.82414	0.0742058	-0.607635	0.186257
Q06138	Cab39	-0.0481698	0.890488	0.20413	0.421791	-0.135951	0.676158	0.116348	0.570924
Q06185	Atp5me	0.653372	0.0321938	0.861951	0.0127103	0.672487	0.00346238	0.881065	0.00109984
Q06890	Clu	1.20324	0.0439702	1.13475	0.0195235	1.0931	0.141844	1.02461	0.12335
Q07076	Anxa7	-0.693404	0.0503051	-0.352242	0.0749821	-0.623159	0.0492469	-0.281998	0.040241
Q07417	Acads	0.409421	0.41807	-0.357198	0.135607	0.545387	0.302185	-0.221231	0.346382
Q07813	Bax	1.35466	0.0716136	2.43714	0.0490365	0.975548	0.0930811	2.05803	0.0628452
Q08189	Tgm3	-2.13972	0.525028	-1.00791	0.649362	-1.06226	0.710592	0.0695534	0.961763
Q08274	Dmwd	1.79455	0.0148021	2.16221	0.0507085	1.76305	0.00341366	2.13071	0.039639
Q08331	Calb2	0.0919075	0.615432	-0.437785	0.0153596	0.189495	0.440442	-0.340197	0.130532
Q08460;Q08460-5	Kcnma1	3.14772	0.0183768	3.64306	0.00386862	2.79505	0.00968099	3.29038	0.000175125
Q08460-2	Kcnma1	1.58452	0.305196	1.70329	0.309836	1.26402	0.0330549	1.38278	0.118399
Q08642	Padi2	0.594443	0.240931	0.133594	0.735124	0.525304	0.231913	0.064455	0.838705
Q08890	Ids	-1.05819	0.584051	-0.26378	0.186101	-0.900802	0.638687	-0.106396	0.43835
Q08943;Q08943-2	Ssrp1	-1.49918	0.165801	0.153522	0.670716	-1.11945	0.338612	0.53325	0.441639
Q0GA42	Cnnm1	2.17093	0.163395	3.24182	0.00231804	1.95079	0.203012	3.02167	0.003663
Q0KL02;Q0KL02-3;Q0KL02-4	Trio	0.567317	0.251172	1.33214	0.0179299	0.411314	0.226866	1.17614	0.00139782
Q0P5V9;Q0P5V9-2;Q0P5V9-3	Slc45a4	-0.555278	0.407784	0.279577	0.730842	-1.57443	0.203766	-0.739576	0.550389
Q0P5W1;Q0P5W1-3	Vps8	3.37221	0.0085959	2.15552	0.233793	3.36223	0.0046986	2.14554	0.223593
Q0V8T8;Q0V8T8-2	Cntnap5b	1.64833	0.156913	2.01523	0.0710245	-0.183312	0.823387	0.18359	0.779236
Q0V8T9	Cntnap5a	2.54695	0.114565	3.96942	0.00524811	1.77325	0.234101	3.19571	0.0113331
Q0VBD0	Itgb8	-0.357776	0.730791	-0.36099	0.722559	0.811871	0.0585722	0.808656	0.0250268
Q0VBF8	Stum	2.64688	0.00161619	3.26827	0.000406361	2.15932	0.00251343	2.7807	0.000478289
Q0VBK2	Krt80	-2.91334	0.294955	-1.72035	0.168525	-2.44054	0.339011	-1.24755	0.0695418
Q0VE82	Cpne7	0.558491	0.606146	0.578558	0.402226	-0.245778	0.800428	-0.225712	0.648689
Q0VGY8	Tanc1	2.18928	0.000364399	1.43822	0.00729641	2.03132	0.000179332	1.28027	0.0076098
Q11011	Npepps	-0.632925	0.264687	-0.108583	0.0673366	-0.506268	0.361059	0.0180747	0.807594
Q11136	Pepd	-0.35696	0.183796	-0.19206	0.436242	-0.0612418	0.82457	0.103657	0.709091
Q148B6	Spatc1	0.162134	0.813902	-0.13415	0.845219	-0.276395	0.164983	-0.572679	0.0231692
Q148V7	Relch	1.82215	0.00153472	1.7537	0.00332396	1.60422	0.000446247	1.53578	0.00195447
Q149F3	Gspt2	2.43796	0.0201362	2.18416	0.0235295	2.06064	0.0243811	1.80684	0.0288632
Q14B80	Kcnc2	3.86335	0.00332092	1.14309	0.286398	3.45746	0.00695342	0.737198	0.489962
Q14BB9	Map6d1	-0.23916	0.132588	-0.288146	0.145646	0.18609	0.331772	0.137103	0.519932
Q14BI2	Grm2	2.87333	0.00740288	3.47206	0.00138844	2.77963	0.00426883	3.37836	0.000363004
Q14CH0-2	Fam171b	4.81432	0.0222791	4.99205	0.00431075	4.36743	0.0174208	4.54515	0.00061809
Q1EG27;Q1EG27-2	Myo3b	-1.45893	0.428493	1.2334	0.0965914	-1.70057	0.394974	0.99175	0.320999
Q1LZI2	Slc35f3	-0.226676	0.734713	0.102515	0.879224	0.10818	0.799228	0.437371	0.348792
Q2M3X8;Q2M3X8-4	Phactr1	3.70085	0.00326776	4.35905	0.00145103	3.25323	0.000443924	3.91142	8.6621e-05
Q2NL51	Gsk3a	0.83449	0.0369999	0.946891	0.0310625	0.870197	8.17402e-05	0.982598	0.00109634
Q2PFD7;Q2PFD7-2;Q2PFD7-5	Psd3	3.36331	0.00508101	3.63957	0.00364827	2.94027	0.000267289	3.21652	0.000138178
Q2TBE6	Pi4k2a	-0.206752	0.89818	0.454429	0.668177	-0.0161273	0.990081	0.645053	0.17492
Q2TPA8	Hsdl2	-0.00448736	0.991066	-1.11977	0.377639	-0.487958	0.225206	-1.60324	0.224881
Q2TV84;Q2TV84-3	Trpm1	2.06435	0.00164992	2.01094	0.0131909	0.398424	0.776873	0.345017	0.813558
Q2VIS4	Flg2	-2.67366	0.2844	-0.175817	0.86304	-2.93113	0.238165	-0.433287	0.632722
Q2WF71	Lrfn1	1.50901	0.0909417	2.22545	0.0498419	1.34017	0.121185	2.05661	0.062443
Q32M21;Q32M21-3;Q9EST1	Gsdma;Gsdma2	-2.40527	0.308505	-1.74553	0.340641	-2.37293	0.193231	-1.7132	0.102285
Q32NY4;Q32NY4-2	Cnnm3	2.32633	0.0304457	2.1227	0.015296	2.33673	0.0159053	2.13309	0.00294288
Q3B7Z2	Osbp	0.610607	0.047289	0.867314	0.00983742	0.496531	0.0221177	0.753239	0.000919739
Q3KNM2	Marchf5	0.607095	0.265604	1.60006	0.200926	0.151556	0.731187	1.14452	0.325249
Q3TC72	Fahd2	-0.217605	0.343605	-0.387527	0.12188	-0.0768579	0.618419	-0.24678	0.14299
Q3TCN2;Q3TCN2-2	Plbd2	-0.895437	0.576929	-0.0420475	0.946088	-1.45301	0.420724	-0.599619	0.536689
Q3TDK6;Q3TDK6-2	Rogdi	0.756807	0.0175752	0.453529	0.138122	0.947211	0.00107297	0.643933	0.0262559
Q3TDN2;Q3TDN2-2	Faf2	1.93316	0.20562	0.454284	0.135291	1.86832	0.222003	0.389439	0.267682
Q3TDQ1	Stt3b	0.254006	0.473876	2.85055	0.076152	0.111118	0.792691	2.70766	0.0907835
Q3TEA8;Q3TEA8-2;Q3TEA8-3	Hp1bp3	-0.674239	0.156077	-0.536689	0.122442	-0.783679	0.110131	-0.646129	0.0746168
Q3TES0	Iqsec3	0.787751	0.0932396	0.845459	0.121123	0.84655	0.126487	0.904258	0.144751
Q3TFQ1	Spryd7	0.553624	0.419069	1.19437	0.0146321	0.241048	0.70575	0.881797	0.0219597
Q3TH73	Ttyh2	2.50361	0.0985547	2.08941	0.111457	1.3244	0.462313	0.910202	0.584664
Q3THE2	Myl12b	-0.415281	0.0407787	-0.11376	0.751123	0.0230796	0.86196	0.324601	0.379543
Q3THK7	Gmps	-0.661188	0.0902719	-0.354372	0.311322	-0.438396	0.186771	-0.131579	0.668124
Q3THS6	Mat2a	-0.193731	0.411156	0.293974	0.0884876	-0.152056	0.512461	0.335649	0.0636382
Q3TIR3	Ric8a	0.117853	0.846224	1.44195	0.0911424	0.234827	0.587596	1.55893	0.037394
Q3TIU4	Pde12	0.0351591	0.958183	0.233991	0.702643	0.142957	0.756872	0.341789	0.368832
Q3TL44	Nlrx1	-0.365828	0.600888	-0.469596	0.474445	-0.113293	0.851999	-0.217061	0.693795
Q3TLI0	Trappc10	0.300712	0.292452	1.17067	0.031867	0.528827	0.0305811	1.39879	0.0106021
Q3TMH2	Scrn3	1.10377	0.0213528	0.820769	0.012009	0.875572	0.0256709	0.592571	0.00321247
Q3TP92	Ctdnep1	1.63172	0.094722	2.32249	0.0147329	-0.0730607	0.949353	0.617707	0.55617
Q3TPX4	Exoc5	0.0632254	0.726438	0.220246	0.671347	0.358099	0.21435	0.515119	0.371836
Q3TRJ4	Krt26	0.288744	0.754989	0.831812	0.420693	-0.912327	0.315332	-0.369259	0.691277
Q3TRM4;Q3TRM4-2;Q3TRM4-3;Q3TRM4-4	Pnpla6	0.183226	0.71525	0.613824	0.544726	0.255489	0.523184	0.686088	0.479881
Q3TTA7	Cblb	2.59127	0.0627393	1.91912	0.107652	2.1845	0.0899544	1.51235	0.16596
Q3TTY5	Krt2	-2.77537	0.213463	-1.91175	0.12068	-1.9594	0.31788	-1.09577	0.147299
Q3TVA9;Q3TVA9-2	Ccdc136	1.23122	0.0684221	2.18998	0.089165	1.4458	0.0375402	2.40456	0.067844
Q3TW96	Uap1l1	0.820485	0.224259	1.33565	0.345659	0.231428	0.694151	0.746588	0.579512
Q3TWI9	Tmem63b	1.75259	0.120729	3.66381	0.0401657	1.14702	0.274101	3.05824	0.0683366
Q3TWL2	Pip4p1	1.83548	0.121399	1.89777	0.0321287	1.38074	0.137388	1.44303	0.000804879
Q3TWN3	Cnnm2	2.45609	0.00350386	2.94923	0.00276648	2.06241	0.00283305	2.55555	0.0024751
Q3TXS7	Psmd1	0.698827	0.0250426	0.889548	0.00856354	0.739529	0.0187399	0.93025	0.00635959
Q3TXX4	Slc17a7	2.59568	0.0230769	3.15734	0.00984219	2.34555	0.00725718	2.9072	0.00185328
Q3TY60-2	Fam131b	4.31886	0.0145517	6.62015	0.00994989	4.07164	0.0039418	6.37294	0.00596588
Q3TY86;Q3TY86-2;Q3TY86-3	Aifm3	2.82955	0.148582	3.99428	0.00123172	2.635	0.167031	3.79972	0.000795851
Q3TYX3	Smyd5	0.243194	0.582671	-0.421491	0.106429	0.797586	0.125779	0.132901	0.56895
Q3TZX3;Q922G0	Slc25a33;Slc25a36	1.1624	0.0764207	-0.242286	0.299124	0.964303	0.105921	-0.440388	0.0265246
Q3TZZ7	Esyt2	1.06724	0.465502	2.11147	0.0204009	0.911679	0.511691	1.9559	0.00934706
Q3U0D9;Q3U0D9-3	Hace1	-1.63457	0.0763058	-0.230522	0.822274	-0.496312	0.254254	0.907733	0.302812
Q3U0M1;Q3U0M1-2	Trappc9	0.797741	0.511237	0.576259	0.505088	0.956291	0.434359	0.734808	0.39923
Q3U0V1	Khsrp	-0.372957	0.108352	-0.434327	0.0405791	0.157355	0.227431	0.0959851	0.0190418
Q3U186	Rars2	0.531885	0.571234	1.69178	0.00747779	-0.30295	0.744299	0.856941	0.0685842
Q3U1F9	Pag1	1.62266	0.190017	1.23191	0.279197	0.816573	0.254529	0.425826	0.472091
Q3U1J4	Ddb1	-0.061683	0.510531	0.0620251	0.613997	-0.00192642	0.985995	0.121782	0.393236
Q3U1T9	Dennd1b	0.824151	0.240114	1.45053	0.213841	-0.610677	0.301539	0.0157051	0.987395
Q3U1Y4	Dennd4b	1.70807	0.10675	2.26996	0.0574917	1.78406	0.0354609	2.34594	0.0195679
Q3U214	Mast3	0.545529	0.386459	0.966915	0.0908937	0.75719	0.208764	1.17858	0.0310134
Q3U2I3;Q3U2I3-3	Fhip1b	1.06255	0.259435	1.31068	0.183165	0.641729	0.373238	0.889857	0.241786
Q3U3R4;Q3U3R4-2;Q3U3R4-3	Lmf1	0.414277	0.739135	0.815023	0.53858	0.949996	0.048347	1.35074	0.0509914
Q3U5C7	Prickle1	2.52694	0.10186	1.56138	0.289072	0.602501	0.567365	-0.363057	0.751438
Q3U5Q7	Cmpk2	0.231375	0.536126	-0.231426	0.178682	0.290638	0.434781	-0.172163	0.237158
Q3U7R1	Esyt1	1.31399	0.359407	0.099912	0.896087	0.927581	0.504366	-0.286498	0.707388
Q3U7U3	Fbxo7	0.781394	0.264866	1.72181	0.0447676	0.642932	0.0828906	1.58335	0.00395652
Q3UBX0	Tmem109	1.85875	0.0708583	1.9615	0.0784007	0.885131	0.297073	0.98788	0.292002
Q3UDE2	Ttll12	-0.64479	0.229884	-0.261458	0.154571	-0.4011	0.428483	-0.0177676	0.91123
Q3UDF0;Q3UDF0-2	Slc2a6	0.399829	0.510096	0.709001	0.222157	0.300954	0.679569	0.610126	0.385341
Q3UDR8	Yipf3	0.349464	0.735089	0.836069	0.425006	0.317997	0.567354	0.804602	0.162145
Q3UE31		-0.118442	0.941253	1.78194	0.191954	-1.68144	0.226374	0.218943	0.745612
Q3UEZ8	Slc10a4	0.442612	0.703533	0.891101	0.440658	0.284634	0.500524	0.733122	0.0426018
Q3UFS0;Q3UFS0-2;Q3UFS0-3	Zyg11b	2.13065	0.02446	2.05021	0.118077	1.87814	0.0405513	1.7977	0.161069
Q3UFT3	Garem1	3.45207	0.00140437	2.9234	0.00231642	2.85163	0.00056733	2.32296	0.000909502
Q3UG20;Q5XJV7;Q5XJV7-2	Kmt2e;Setd5	-0.743194	0.255526	-0.744213	0.262916	-0.731044	0.0779982	-0.732063	0.0908178
Q3UGC7;Q66JS6	Eif3j1;Eif3j2	0.222697	0.72431	0.632646	0.292292	-1.32962	0.116869	-0.919667	0.205503
Q3UGR5	Hdhd2	0.140307	0.652762	0.0252927	0.887752	-0.029363	0.921929	-0.144378	0.403752
Q3UGX3	Nat8l	-0.402731	0.528285	0.0281045	0.97344	-0.949904	0.328488	-0.519069	0.634112
Q3UGY8	Arfgef3	2.38971	0.0653654	2.47797	0.0105294	2.17066	0.0717636	2.25891	0.0069195
Q3UH60	Dip2b	0.527852	0.302012	1.1779	0.00551011	0.243223	0.588444	0.893274	0.00301746
Q3UH66-3;Q3UH66-5;Q3UH66-7	Wnk2	2.00588	0.0180592	2.07994	0.01686	1.62592	0.00975574	1.69999	0.00937881
Q3UH68	Limch1	-0.682714	0.0262023	-0.201748	0.708823	-0.515544	0.0674324	-0.0345774	0.948844
Q3UH93	Plxnd1	1.72633	0.193261	0.623056	0.58435	1.43236	0.254111	0.329086	0.762783
Q3UH99-2	Shisa6	-0.00595792	0.993056	0.928593	0.254186	0.766699	0.0169877	1.70125	0.00695955
Q3UHB1	Nt5dc3	0.0174176	0.92589	-0.0491625	0.777335	-0.233766	0.119507	-0.300346	0.0367527
Q3UHC7;Q3UHC7-2;Q3UHC7-3;Q3UHC7-4	Dab2ip	2.684	0.0234653	3.78034	0.00549882	2.55049	0.0201238	3.64683	0.00407399
Q3UHD1	Adgrb1	2.73775	0.0135593	2.98226	0.00158597	2.62262	0.0113665	2.86712	0.000532408
Q3UHD2	Gfod1	0.348426	0.526453	-0.105529	0.436136	-0.215314	0.825691	-0.669269	0.436667
Q3UHD6;Q3UHD6-2	Snx27	0.0123653	0.939001	0.0982771	0.543055	-0.0306705	0.885067	0.0552413	0.792329
Q3UHD9	Agap2	2.37765	0.00872082	2.95217	0.00437588	2.12522	0.000539348	2.69974	0.000338445
Q3UHE1;Q3UHE1-2	Pitpnm3	2.96307	0.0343967	2.59882	0.0650303	2.67278	0.00418572	2.30852	0.0203348
Q3UHH2	Slc22a23	3.93552	0.00383537	3.89538	0.00205863	3.51005	0.00183771	3.46991	0.000399704
Q3UHJ0;Q3UHJ0-2	Aak1	1.17377	0.0151489	1.19012	0.0133289	1.0481	0.000561898	1.06445	0.000224111
Q3UHK1	Slc2a13	2.8743	0.0285968	2.28903	0.0223399	2.73125	0.014423	2.14597	0.00242012
Q3UHK6-3;Q3UHK6-4	Tenm4	1.9693	0.0170928	1.56377	0.0143206	1.89138	0.0139424	1.48584	0.00872213
Q3UHL1	Camkv	0.773739	0.0120847	0.980874	0.00841351	0.527262	0.0503196	0.734397	0.0265029
Q3UHU5;Q3UHU5-2;Q3UHU5-3	Mtcl1	-0.149993	0.842555	0.29796	0.804641	-0.0158151	0.976919	0.432138	0.692752
Q3UHX2	Pdap1	3.00138	0.01623	2.33131	0.10109	2.75316	0.01483	2.08309	0.117013
Q3UIU2	Ndufb6	0.678248	0.0300544	0.633436	0.0235593	0.314778	0.136731	0.269966	0.114433
Q3UJD6;Q3UJD6-2	Usp19	0.921003	0.0963846	0.759566	0.137449	0.170079	0.471813	0.00864156	0.964259
Q3UJP5	Cfap418	2.52447	0.00275917	2.57677	0.00124929	2.17593	0.000777343	2.22823	2.17802e-05
Q3UJU9	Rmdn3	0.332496	0.576735	0.115389	0.749104	0.584969	0.345121	0.367863	0.334081
Q3UKC1	Tax1bp1	-1.26973	0.053924	-0.88803	0.258232	-1.07909	0.0908424	-0.697384	0.36692
Q3UKJ7;Q3UKJ7-2	Smu1	0.118648	0.897379	-0.0738729	0.89399	0.166302	0.855242	-0.0262187	0.961132
Q3UL36;Q3UL36-2	Arglu1	-0.770638	0.476268	-1.22245	0.0781765	-1.02219	0.377175	-1.474	0.0717948
Q3ULD5	Mccc2	0.302266	0.484485	-0.0461283	0.862217	0.302322	0.482314	-0.0460723	0.860632
Q3ULJ0;Q3ULJ0-2	Gpd1l	-0.166686	0.3692	-0.176756	0.290237	0.0794449	0.507541	0.0693754	0.414963
Q3UM45	Ppp1r7	-0.293667	0.271928	-0.0922178	0.283748	-0.607842	0.0677355	-0.406393	0.0209635
Q3UMB5	Smcr8	2.98744	0.0068273	2.53998	0.088068	2.89265	0.00228951	2.44519	0.0815483
Q3UMB9	Washc4	1.9935	0.0310648	2.08694	0.126339	1.80903	0.0279738	1.90247	0.142163
Q3UMC0;Q9D3R6;Q9D3R6-3	Katnal2;Spata5	-4.29514	0.0969605	-4.07262	0.108467	-2.39816	0.315276	-2.17564	0.35444
Q3UMR5	Mcu	1.02988	0.0167977	1.21761	0.0141894	0.653686	0.0935241	0.841423	0.0617208
Q3UMY5;Q3UMY5-2;Q3UMY5-3;Q3UMY5-4	Eml4	2.42715	0.156919	0.585207	0.556887	1.28192	0.550534	-0.560016	0.753254
Q3UN02	Lclat1	1.87978	0.126736	1.79679	0.235626	2.23076	0.00602401	2.14776	0.0840694
Q3UN16	Gpr162	3.44577	0.0050024	3.16901	0.00166065	2.89851	0.00576167	2.62175	0.000902068
Q3UNH4	Gprin1	0.778287	0.0550097	1.05413	0.00990099	0.420907	0.130954	0.696753	0.00612807
Q3UNZ8;Q3UNZ8-2	Cryzl2	0.336079	0.522624	0.979817	0.347901	-0.0990772	0.835315	0.544661	0.579785
Q3UPL0;Q3UPL0-2	Sec31a	-0.50386	0.0272054	-0.258915	0.053717	-0.407881	0.0421416	-0.162937	0.111279
Q3UQ84	Tars2	0.120351	0.846557	-0.202883	0.587761	-0.774707	0.399987	-1.09794	0.179526
Q3UR70	Tgfbrap1	-1.25734	0.0246221	-0.899519	0.015661	-0.696335	0.0769442	-0.338517	0.0192009
Q3URD3;Q3URD3-2	Slmap	1.61385	0.145409	1.54733	0.163609	0.191324	0.828319	0.124803	0.889301
Q3URE1;Q3URE1-2	Acsf3	-0.0884082	0.952957	-1.29292	0.365239	0.985578	0.321601	-0.218936	0.741273
Q3URE9	Lingo2	4.28027	0.0006623	5.17916	0.000303402	3.47664	0.000310996	4.37553	0.000115042
Q3USB7	Plcl1	1.11817	0.205308	0.392063	0.368799	1.07082	0.237484	0.34471	0.481562
Q3USH1	Insyn2a	-0.0428689	0.933901	0.196401	0.714513	-0.817461	0.0246513	-0.578191	0.0915479
Q3UTH8;Q3UTH8-2;Q3UTH8-3;Q3UTH8-4	Arhgef9	0.641337	0.673172	1.01097	0.507214	2.04622	0.165341	2.41585	0.11033
Q3UTJ2;Q3UTJ2-2	Sorbs2	0.0318219	0.84337	0.28057	0.414729	-0.0637665	0.705261	0.184982	0.584659
Q3UTQ8	Cdkl5	1.88995	0.223127	1.5893	0.0974378	1.56378	0.240481	1.26313	0.0195369
Q3UU96;Q3UU96-2	Cdc42bpa	1.0355	0.168202	0.512555	0.157167	0.954242	0.165743	0.431298	0.0523197
Q3UUF8	Ankrd34b	1.44563	0.075798	2.02559	0.00471236	0.29873	0.637477	0.878694	0.0518881
Q3UUG6;Q3UUG6-2	Tbc1d24	3.0454	0.00592431	3.29012	0.00569313	2.78592	0.000673704	3.03065	0.00111737
Q3UUI3	Them4	-0.134883	0.59761	-0.270453	0.234831	-0.315382	0.122726	-0.450953	0.00738562
Q3UUJ4	Strada	2.9573	0.0250204	4.08175	0.0196534	2.44777	0.00538079	3.57222	0.0116263
Q3UUQ7	Pgap1	1.26244	0.085475	0.732966	0.0583014	0.566797	0.358516	0.0373255	0.893297
Q3UV17	Krt76	-2.78906	0.268596	-1.63676	0.0687118	-2.45013	0.311286	-1.29784	0.041877
Q3UV70	Pdp1	-0.18443	0.67228	-0.427058	0.443661	0.0643336	0.79673	-0.178294	0.662668
Q3UVC0	Ksr2	2.46974	0.00832853	1.88382	0.0108992	2.18276	0.00344352	1.59684	0.00138693
Q3UVK0	Ermp1	0.332738	0.740748	1.63496	0.0308135	0.351886	0.72109	1.65411	0.0231451
Q3UVL4	Vps51	0.153261	0.44233	0.357166	0.0895994	0.0472336	0.749406	0.251139	0.0864669
Q3UVX5	Grm5	1.91285	0.00873527	2.6792	0.0021395	1.69353	0.00667357	2.45989	0.00126676
Q3UX83;Q3UX83-2	Accsl	-0.664289	0.727468	-0.811701	0.652391	0.403989	0.821739	0.256578	0.877827
Q3UYC0	Ppm1h	-0.0412165	0.846343	0.588072	0.123126	0.232427	0.28576	0.861715	0.0431404
Q3UYH7	Adrbk2	2.09963	0.1916	1.83194	0.325566	2.36595	0.0062758	2.09826	0.114889
Q3UYV9	Ncbp1	0.281189	0.707436	0.54297	0.560214	0.328025	0.495659	0.589807	0.423082
Q3UZP4	Svip	4.45451	0.00191778	5.7309	0.00588182	3.43825	0.00171852	4.71464	0.00891895
Q3V0C5-3;Q3V0C5-4	Usp48	-1.26577	0.477966	0.0453046	0.945103	-1.17242	0.489587	0.138646	0.731109
Q3V0G7;Q3V0G7-2	Garnl3	2.94088	0.0157431	2.35918	0.121088	2.91711	0.0120693	2.33541	0.115668
Q3V0I2	Prr7	3.38562	0.0137847	2.45106	0.0345713	3.27139	0.00456433	2.33683	0.0114502
Q3V0J1-2;Q3V0J1-3	Tmem237	-0.624039	0.135002	-0.485429	0.237405	-0.396891	0.171325	-0.25828	0.376886
Q3V132	Slc25a31	2.10786	0.0223287	2.58114	0.00454118	1.42986	0.0682031	1.90314	0.0125761
Q3V1L4	Nt5c2	-0.186732	0.461144	0.328808	0.562382	-0.41009	0.375891	0.10545	0.873917
Q3V1U8	Elmod1	2.42573	0.0491814	2.55434	0.00213522	2.32827	0.0529375	2.45688	0.00174165
Q3V384	Afg1l	0.73611	0.41112	-0.542356	0.211347	0.761393	0.388072	-0.517074	0.190321
Q3V3Q7	Pacs2	2.85585	0.00702855	3.21529	0.00174502	2.21087	0.00841802	2.57031	0.000834037
Q3V3R1	Mthfd1l	-0.481436	0.125924	-0.314358	0.237209	-0.203703	0.265497	-0.0366246	0.770485
Q3V3V9-2	Carmil2	4.18919	0.00995228	4.95826	0.0111403	3.71043	0.00497867	4.4795	0.00824218
Q499X9	Mars2	0.177846	0.791184	0.807353	0.165542	-0.901407	0.379571	-0.2719	0.755853
Q4ACU6;Q4ACU6-10;Q4ACU6-11;Q4ACU6-3;Q4ACU6-7;Q4ACU6-8;Q4ACU6-9	Shank3	0.0654233	0.760792	0.259263	0.425221	0.121226	0.522088	0.315066	0.314311
Q4JIM5	Abl2	2.88023	0.0138559	2.3596	0.00697459	2.59705	0.00878728	2.07642	0.000392002
Q4KL25	Lhfpl5	1.26773	0.263147	1.20112	0.160802	-0.0633465	0.954633	-0.129961	0.878254
Q4KMM3	Oxr1	0.942349	0.028946	1.1188	0.0164959	0.911649	0.00243639	1.0881	0.00118358
Q4KUS2	Unc13a	0.748949	0.143131	1.24774	0.0293252	0.658327	0.139405	1.15711	0.021353
Q4PJX1;Q4PJX1-2;Q4PJX1-3	Odr4	-3.83597	0.228883	-1.30566	0.320991	-4.25673	0.186136	-1.72643	0.183349
Q4PNJ2	Nkain2	1.96028	0.301035	3.21348	0.121801	3.16357	0.00226708	4.41677	0.000439395
Q4QQM4	Trp53i11	2.1851	0.0838163	1.63182	0.0256447	1.63864	0.139846	1.08536	0.0289118
Q4V9Z5-2;Q4V9Z5-3	Sez6l2	0.814676	0.209373	0.80847	0.0197976	0.89087	0.184862	0.884664	0.0220006
Q4VA53;Q4VA53-3	Pds5b	1.25115	0.196112	0.503028	0.42385	-0.718331	0.47155	-1.46645	0.103245
Q4VA61	Dscaml1	-0.124873	0.789035	0.542503	0.124394	-1.52812	0.0722436	-0.86074	0.18171
Q4VAE3	Tmem65	1.39598	0.00641168	1.4648	0.00546095	1.0497	0.0136994	1.11851	0.0111799
Q4VBD2	Tapt1	1.48504	0.0261862	1.76179	0.0227627	0.811632	0.28277	1.08838	0.192072
Q4VBE8	Wdr18	-0.192831	0.831897	0.258313	0.774728	0.638154	0.268305	1.0893	0.0874024
Q501J6	Ddx17	-0.58266	0.0287996	-0.32336	0.00874513	-0.414509	0.0802227	-0.155209	0.111172
Q505D7	Opa3	0.0914501	0.549872	-0.179228	0.384673	0.137602	0.368118	-0.133076	0.501644
Q505F5	Lrrc47	0.200703	0.231438	0.003836	0.983886	0.37103	0.0885979	0.174164	0.427802
Q50H33;Q50H33-2	Kctd8	1.53186	0.123287	0.409204	0.210205	1.57127	0.107337	0.448615	0.0700568
Q52KF3;Q52KF3-2;Q52KF3-3	Spire1	2.41751	0.072911	2.11946	0.148649	2.04188	0.111001	1.74384	0.216022
Q52KR3;Q52KR3-2;Q52KR3-3;Q52KR3-4;Q52KR3-6	Prune2	3.00264	0.120758	1.79687	0.0314118	2.6995	0.139662	1.49373	0.0136155
Q569Z5;Q569Z5-2	Ddx46	-0.727782	0.434844	-0.173254	0.700504	-0.858016	0.337821	-0.303489	0.376254
Q56A07	Scn2b	2.19302	0.0111438	2.77291	0.00659623	1.42604	0.00490892	2.00593	0.00370724
Q571I9	Aldh16a1	-0.668084	0.440598	1.17321	0.0581637	-1.38056	0.124432	0.460738	0.21005
Q58A65;Q58A65-2;Q58A65-5	Spag9	0.984194	0.051681	1.43642	0.0519515	0.343066	0.24973	0.795291	0.15874
Q59J78	Ndufaf2	-0.113626	0.786016	-0.470145	0.298265	-0.256317	0.147074	-0.612836	0.0145809
Q5DQR4;Q5DQR4-2	Stxbp5l	1.56646	0.0118243	1.91629	0.00582092	1.35728	0.00121046	1.70711	0.000498128
Q5DTL9;Q5DTL9-2;Q5DTL9-3;Q5DTL9-4	Slc4a10	2.77512	0.0185343	2.73387	0.00496781	2.38506	0.0263419	2.34382	0.00607743
Q5DTN8	Jakmip3	1.51563	0.151069	1.89294	0.0942868	1.21895	0.122867	1.59627	0.0672733
Q5DTT2;Q5DTT2-2;Q5DTT2-3	Psd	1.99791	0.0794398	1.82875	0.0897131	1.65499	0.0382519	1.48583	0.0385009
Q5DTX6	Jcad	0.738605	0.608866	1.89197	0.192548	1.30403	0.190229	2.4574	0.0156443
Q5DTY9	Kctd16	0.457338	0.315099	0.486523	0.113209	0.598371	0.151558	0.627556	0.00564468
Q5DTZ6;Q5DTZ6-3	Rnf150	-0.925832	0.0966652	0.710064	0.172099	-0.551223	0.167628	1.08467	0.0293544
Q5DU25	Iqsec2	0.604692	0.0755257	0.893044	0.0100773	0.442753	0.15487	0.731105	0.0195073
Q5DU31;Q5DU31-2	Ipcef1	2.34239	0.0605163	2.49657	0.0312462	2.31553	0.0104943	2.46971	0.000162619
Q5DU41	Lrrc8b	1.65203	0.301879	2.68532	0.0190144	1.20333	0.396241	2.23661	0.00495179
Q5EBJ4	Ermn	-1.27097	0.139109	-1.63604	0.045038	-0.950128	0.515449	-1.3152	0.360489
Q5EG47	Prkaa1	3.64212	0.000177637	-0.0861381	0.792958	3.58874	0.000387968	-0.139525	0.715546
Q5F2E8	Taok1	0.27111	0.343125	0.719385	0.0251819	-0.0309938	0.901788	0.417281	0.0879808
Q5FW52;Q5FW52-2	Mlip	1.21746	0.236948	2.05666	0.0344997	1.40017	0.150709	2.23937	0.0134799
Q5FWH7;Q5FWH7-2	Slc39a12	3.31132	0.0006393	4.07553	0.0072576	2.91879	0.00200811	3.683	0.0117121
Q5FWI3	Cemip2	2.85828	0.0654587	3.40529	0.0166863	2.14659	0.0733289	2.69359	0.00546235
Q5FWK3	Arhgap1	2.06424	0.0117642	2.64056	0.00456153	1.79173	0.00147195	2.36804	0.000346154
Q5GH64	Xkr7	3.20403	0.0987598	3.59137	0.0836665	3.44774	0.000299475	3.83508	0.00226733
Q5GH67	Xkr4	3.34264	0.0154217	4.17128	0.00724252	2.91231	0.00666549	3.74095	0.00272304
Q5H8C4;Q5H8C4-2	Vps13a	0.857592	0.0156278	0.917782	0.0120559	0.622244	0.000550245	0.682433	0.000242533
Q5HZI2	C2cd4c	3.35164	0.0087666	5.69978	0.0157993	2.60971	0.00410451	4.95785	0.019228
Q5HZI9	Slc25a51	1.05116	0.0609178	2.08538	0.0095989	1.07327	0.0503519	2.10749	0.00807287
Q5IRJ6;Q5IRJ6-2	Slc30a9	1.46458	0.0494809	1.06574	0.0248391	1.18221	0.0634222	0.783368	0.0116228
Q5M8N0	Cnrip1	0.453147	0.386376	0.548019	0.12815	0.152946	0.725327	0.247818	0.2189
Q5NCE8	Mrs2	2.22826	0.0112733	2.02248	0.0316528	1.04016	0.333268	0.83438	0.457855
Q5PR73	Diras2	3.20811	0.00865927	3.75895	0.00458948	2.82611	0.0018626	3.37695	0.000751849
Q5QNQ6	Osbp2	1.37197	0.209412	1.82495	0.147546	1.26787	0.218811	1.72085	0.15236
Q5QNQ9	Col27a1	0.502748	0.390307	-0.277129	0.520058	0.489511	0.392927	-0.290366	0.486541
Q5RJI5	Brsk1	1.70798	0.0165878	2.70751	0.0742376	1.3634	0.015449	2.36294	0.0971024
Q5RKR3	Islr2	0.852921	0.467918	2.05076	0.11207	1.11916	0.0909146	2.317	0.00349946
Q5SP85;Q5SP85-2	Ccdc85a	2.86358	0.00144176	2.54856	0.00289863	2.02676	0.000361301	1.71174	0.00172777
Q5SQX6	Cyfip2	1.27175	0.00804568	1.47615	0.0080288	0.899785	0.00302567	1.10419	0.00596859
Q5SRX1;Q5SRX1-2;Q5SRX1-3;Q5SRX1-4	Tom1l2	0.128639	0.572525	0.140911	0.443244	0.293094	0.206752	0.305367	0.105647
Q5SS80	Dhrs13	0.858626	0.248935	1.59083	0.0830635	0.368531	0.10344	1.10073	0.0269457
Q5SSH7;Q5SSH7-2	Zzef1	1.88105	0.00190805	2.23594	0.000701216	1.73601	0.00567002	2.0909	0.00232739
Q5SSL4;Q5SSL4-2	Abr	2.41454	0.00239625	2.595	0.00113851	1.91415	0.00132275	2.09462	0.000262185
Q5SSM3;Q5SSM3-2;Q5SSM3-3	Arhgap44	1.14645	0.0351443	1.33733	0.0232601	1.22892	0.000323587	1.4198	0.000413245
Q5SUR0	Pfas	-0.259415	0.320312	-0.539394	0.0209654	-0.0101455	0.967194	-0.290125	0.126552
Q5SV85-2	Synrg	4.6213	0.00413381	5.46327	0.00117256	4.2328	0.00328699	5.07477	0.000652728
Q5SVL6	Rap1gap2	1.97517	0.0232514	1.88829	0.00651682	1.69748	0.0185473	1.6106	0.000436185
Q5SVR0;Q5SVR0-2	Tbc1d9b	1.06674	0.159674	1.1764	0.136325	0.718898	0.164137	0.828553	0.134479
Q5SW19;Q5SW19-2;Q5SW19-3	Cluh	0.844839	0.533335	1.31528	0.368534	0.79644	0.55502	1.26688	0.38371
Q5SWT3	Slc25a35	-0.233162	0.816046	0.98313	0.253122	-0.504693	0.482099	0.711599	0.0737547
Q5SWU9-2	Acaca	-0.706935	0.317409	-0.990096	0.211942	-0.48026	0.339579	-0.763422	0.207229
Q5SWY7	Fam83g	-0.780196	0.625887	0.29799	0.529304	-1.96733	0.278985	-0.889143	0.264329
Q5SXY1;Q5SXY1-3	Specc1	-0.466646	0.654762	-0.13612	0.875879	-0.489492	0.621457	-0.158966	0.843821
Q5SYD0	Myo1d	0.49021	0.235524	-0.00787481	0.970768	0.622984	0.143413	0.124899	0.540225
Q5U3K5	Rabl6	0.912671	0.0829037	0.777698	0.0174108	0.793895	0.0988453	0.658923	0.0091988
Q5U430;Q5U430-3	Ubr3	1.13766	0.0919484	0.890754	0.334291	0.701293	0.311648	0.454386	0.629977
Q5U458	Dnajc11	0.992963	0.0325613	1.05002	0.00378603	0.77906	0.0632975	0.836114	0.00746222
Q5U4D8	Slc5a6	0.981846	0.402369	0.763998	0.492296	0.533095	0.533353	0.315247	0.689041
Q5XJV6	Lmtk3	0.435541	0.456702	0.540571	0.235487	0.683697	0.201073	0.788727	0.0408481
Q5XJY5	Arcn1	0.0619192	0.768491	0.0440118	0.812128	0.214245	0.157273	0.196337	0.0734452
Q5XPI3;Q5XPI3-2	Rnf123	2.57964	0.103628	1.40394	0.458501	3.04598	0.0011991	1.87027	0.209063
Q5Y5T1;Q5Y5T1-2	Zdhhc20	3.51536	0.00800829	3.48876	0.00501125	3.45589	0.00556956	3.42929	0.00292568
Q5Y5T2	Zdhhc18	0.412472	0.546964	0.0424252	0.897621	-0.777452	0.258416	-1.1475	0.00700497
Q5Y5T5	Zdhhc8	0.146227	0.881344	0.167203	0.865019	0.0919453	0.870343	0.112921	0.84294
Q60597;Q60597-2;Q60597-3;Q60597-4	Ogdh	-0.262214	0.299408	-0.447198	0.109967	-0.129944	0.361605	-0.314927	0.0629237
Q60598	Cttn	-0.0765775	0.596943	-0.212076	0.318876	-0.245057	0.205164	-0.380555	0.141156
Q60603	Kcnh1	2.51843	0.0772022	2.66849	0.0642006	2.48406	0.00793029	2.63412	0.00526856
Q60605;Q60605-2	Myl6	-0.0642713	0.763796	-0.216103	0.334358	0.366237	0.0737286	0.214406	0.222227
Q60613	Adora2a	1.10051	0.154703	1.61654	0.119893	0.745082	0.328627	1.26112	0.213103
Q60625	Icam5	0.10615	0.371047	0.162244	0.332244	0.107255	0.488549	0.163349	0.401623
Q60629	Epha5	2.20307	0.012775	2.84477	0.0159638	1.48166	0.0160492	2.12337	0.0256843
Q60631	Grb2	-0.0265026	0.88147	0.401852	0.121177	-0.162134	0.236533	0.266221	0.184766
Q60634	Flot2	2.28551	0.00415722	2.29158	0.00417623	1.93332	0.000245982	1.93939	0.000266447
Q60648	Gm2a	0.418351	0.297266	-0.294866	0.701089	-0.279534	0.811324	-0.99275	0.475239
Q60668;Q60668-3	Hnrnpd	-0.418199	0.053519	-0.450641	0.00128904	-0.433005	0.0559807	-0.465447	0.00349236
Q60676	Ppp5c	1.58213	0.298386	0.435968	0.0767163	1.48238	0.326988	0.336217	0.181362
Q60692	Psmb6	-0.217932	0.257813	-0.0181764	0.917701	-0.427338	0.0653035	-0.227582	0.25039
Q60714	Slc27a1	3.16522	0.0165905	3.67535	0.0681715	2.66311	0.0254386	3.17324	0.0961904
Q60737	Csnk2a1	-0.137413	0.428108	0.0656459	0.73453	-0.374721	0.0353463	-0.171662	0.317525
Q60738	Slc30a1	2.8328	0.0122508	6.17571	0.0206212	2.23669	0.00605129	5.5796	0.0245606
Q60749	Khdrbs1	-0.593994	0.212969	-0.538055	0.0871651	-0.137322	0.733573	-0.0813837	0.69545
Q60759	Gcdh	-0.207575	0.456957	-0.279499	0.290035	-0.109998	0.488312	-0.181923	0.139464
Q60766;Q60766-2	Irgm1	1.29861	0.00304735	1.82937	0.000445683	0.797627	0.0481415	1.32839	0.00719325
Q60770;Q60770-2	Stxbp3	1.5666	0.144763	0.835125	0.33452	1.44964	0.149737	0.71816	0.364465
Q60771	Cldn11	1.61496	0.0172518	1.99635	0.0022425	1.40868	0.0274145	1.79006	0.00355089
Q60780	Gas7	2.64156	0.0776347	3.79647	0.0345542	2.76004	0.00198487	3.91494	0.00268461
Q60790	Rasa3	0.447232	0.81993	0.199195	0.662519	0.581933	0.766678	0.333895	0.437702
Q60803	Traf3	1.55045	0.0294943	1.3228	0.074484	1.67703	0.0583215	1.44937	0.10789
Q60806;Q60806-2	Plk3	-0.830036	0.378367	-0.168976	0.550938	-1.47687	0.178883	-0.815815	0.132396
Q60854	Serpinb6	0.0999498	0.689759	0.106974	0.679142	0.0688381	0.516573	0.0758622	0.54092
Q60864	Stip1	-0.0893199	0.305919	-0.123861	0.170501	-0.0840289	0.468944	-0.11857	0.316877
Q60865	Caprin1	-0.137081	0.448461	-0.179945	0.191022	-0.342488	0.0804585	-0.385352	0.0127877
Q60870	Reep5	1.37459	0.0109836	1.22671	0.00521917	1.00426	0.0120196	0.856374	0.000666678
Q60872;Q8BMJ3	Eif1a;Eif1ax	0.350894	0.719298	0.251768	0.623323	-0.0882797	0.931202	-0.187406	0.757101
Q60875;Q60875-4;Q60875-5	Arhgef2	-0.460721	0.136052	-0.0655677	0.759181	-0.437026	0.115326	-0.041873	0.808467
Q60899	Elavl2	0.392192	0.575681	-0.00810496	0.972944	0.591963	0.389241	0.191666	0.14853
Q60900;Q60900-2	Elavl3	0.636796	0.414266	-0.282449	0.343985	0.523972	0.490223	-0.395274	0.171929
Q60902;Q60902-2	Eps15l1	2.56814	0.107955	1.42043	0.0291017	2.34244	0.120134	1.19473	0.00535873
Q60930	Vdac2	-0.0690632	0.536921	-0.0458806	0.697286	0.0826168	0.152548	0.105799	0.159096
Q60931	Vdac3	0.13631	0.519663	0.0826797	0.609386	0.0300624	0.882429	-0.0235678	0.879635
Q60932;Q60932-2	Vdac1	-0.185382	0.171593	-0.134593	0.22774	-0.154795	0.086484	-0.104006	0.0399773
Q60960	Kpna1	-0.221439	0.638781	0.972944	0.387164	-0.233805	0.588368	0.960577	0.385639
Q60996;Q60996-3	Ppp2r5c	1.09063	0.0257705	1.46976	0.0117928	0.963117	0.00322363	1.34224	0.00212827
Q61001	Lama5	0.510614	0.537987	-0.522642	0.00284496	0.701679	0.421302	-0.331577	0.19201
Q61006;Q61006-2;Q61006-3	Musk	1.02317	0.350948	0.597539	0.770091	0.971931	0.339392	0.546295	0.785204
Q61016	Gng7	0.024923	0.969168	1.02301	0.1306	-0.0697126	0.902197	0.928378	0.110949
Q61024	Asns	-0.203181	0.1344	-0.148273	0.646187	-0.326342	0.308068	-0.271434	0.529658
Q61029	Tmpo	0.235204	0.91848	-1.40305	0.509864	2.9515	0.188563	1.31325	0.45993
Q61035	Hars1	-1.63191	0.257721	-0.380637	0.0133183	-1.53057	0.283371	-0.279299	0.0150908
Q61036;Q61036-2	Pak3	3.28836	0.052337	1.51241	0.0438897	3.0301	0.0519608	1.25415	0.00428257
Q61037;Q61037-3;Q61037-4;Q61037-5;Q61037-6;Q61037-7	Tsc2	1.32595	0.25802	2.45706	0.0460987	1.10358	0.30341	2.23469	0.0450173
Q61081	Cdc37	0.748922	0.00914541	0.71791	0.130614	0.882289	0.000270244	0.851277	0.0724652
Q61090;Q9JIP6	Fzd2;Fzd7	1.19056	0.112145	1.69176	0.172313	0.637527	0.487113	1.13872	0.388877
Q61097-2	Ksr1	3.33134	0.0068316	3.24772	0.00312235	2.89899	0.00288101	2.81537	0.000129554
Q61102	Abcb7	1.05658	0.0489924	0.965597	0.0193879	0.728102	0.10175	0.637119	0.0343038
Q61120	Shc3	2.83299	0.0777629	3.0322	0.00771945	2.49624	0.0788941	2.69545	0.000442323
Q61137;Q61137-2	Astn1	3.26283	0.00304022	3.37058	0.0377547	2.90404	0.00203208	3.01179	0.0466919
Q61140;Q61140-2	Bcar1	4.50123	0.00437104	4.55214	0.000614814	3.02346	0.235143	3.07437	0.212567
Q61146	Ocln	0.209199	0.76838	0.963196	0.111424	-0.934333	0.288942	-0.180336	0.781124
Q61147	Cp	0.676648	0.614261	-0.853973	0.360418	1.57074	0.165145	0.0401217	0.612343
Q61151	Ppp2r5e	1.43631	0.0123038	1.44027	0.0117514	1.01736	0.00734806	1.02132	0.00653303
Q61161	Map4k2	0.0764659	0.877389	0.862162	0.147783	-1.16471	0.0586355	-0.379015	0.45727
Q61165	Slc9a1	2.99454	0.0480505	4.46522	0.00243588	2.60655	0.050189	4.07723	0.000676161
Q61166	Mapre1	0.129807	0.93389	-1.60431	0.527077	-1.51263	0.0536237	-3.24675	0.158903
Q61171	Prdx2	-0.0760536	0.542878	-0.162434	0.188496	-0.015571	0.857648	-0.101951	0.184081
Q61176	Arg1	-2.60952	0.224973	-1.52954	0.175177	-2.02131	0.297398	-0.941336	0.211915
Q61187	Tsg101	-0.320168	0.216817	0.80142	0.372752	-0.153114	0.486426	0.968474	0.28976
Q61191	Hcfc1	0.965731	0.262986	1.30204	0.0330499	1.04608	0.215525	1.38238	0.0166896
Q61206	Pafah1b2	0.174315	0.286595	0.174884	0.25556	0.103474	0.325159	0.104043	0.243393
Q61207	Psap	-0.291811	0.378396	-0.607462	0.105816	-0.0500673	0.768436	-0.365718	0.07528
Q61214;Q9Z188;Q9Z188-2;Q9Z188-3	Dyrk1a;Dyrk1b	-0.111214	0.905892	0.543246	0.614005	0.337324	0.458576	0.991784	0.182237
Q61234	Snta1	0.0947765	0.8379	0.947829	0.049094	-0.00716877	0.986394	0.845883	0.042285
Q61249	Igbp1	3.24259	0.00763873	3.1757	0.00363934	2.70229	0.00930889	2.6354	0.00327076
Q61271	Acvr1b	4.11332	0.00281064	3.8095	0.0138037	3.40378	0.00132627	3.09997	0.0166965
Q61282	Acan	-0.164824	0.853365	-1.6543	0.284017	1.92893	0.061038	0.439449	0.74938
Q61285	Abcd2	2.22142	0.0411814	3.59527	0.0159668	2.37427	0.0250424	3.74812	0.0111278
Q61290	Cacna1e	2.38253	0.0235757	2.88681	0.015467	1.97714	0.00974795	2.48143	0.0072525
Q61292	Lamb2	0.41586	0.275365	-0.3676	0.0881281	0.4895	0.231875	-0.29396	0.211584
Q61301;Q61301-2;Q61301-3	Ctnna2	0.485765	0.176419	0.584842	0.106432	0.412581	0.0316456	0.511658	0.00436587
Q61315;Q61315-2;Q61315-3;Q61315-4	Apc	0.242326	0.58789	0.858481	0.0239547	0.296895	0.463595	0.913051	0.00401779
Q61316	Hspa4	-0.217095	0.0477591	0.0306555	0.792469	-0.13129	0.111025	0.11646	0.311092
Q61327	Slc6a3	1.9324	0.240852	1.84986	0.217354	3.73053	0.00769083	3.64799	0.00113648
Q61330	Cntn2	0.174561	0.491769	-0.327939	0.256064	0.512005	0.116312	0.00950559	0.973737
Q61333	Tnfaip2	-2.66458	0.326506	-1.42288	0.0744878	-2.42898	0.356693	-1.18729	0.0225469
Q61334	Bcap29	-0.195373	0.531688	0.928587	0.141516	-1.60611	0.00135585	-0.482155	0.359262
Q61335	Bcap31	0.845536	0.0468164	0.983446	0.020229	0.678621	0.0354456	0.816531	0.00818184
Q61361	Bcan	-0.0341765	0.878846	-0.118247	0.543816	0.144133	0.287867	0.060063	0.186571
Q61387	Cox7a2l	-0.418925	0.433894	-0.379983	0.516978	-0.545575	0.12087	-0.506633	0.23448
Q61411	Hras	0.985472	0.084025	1.01642	0.0642635	0.733068	0.045388	0.764022	0.0190353
Q61423	Kcna4	3.97557	0.00958187	4.73046	0.00388009	3.62547	0.00354294	4.38036	0.000873935
Q61425	Hadh	0.121034	0.0698593	-0.342927	0.0489682	-0.0144634	0.837932	-0.478424	0.0214054
Q61469;Q61469-2	Plpp1	1.50831	0.0720964	2.21941	0.0631414	0.958646	0.167325	1.66975	0.115564
Q61481	Pde1a	1.0957	0.00648941	1.39358	0.00456822	0.777161	0.0173791	1.07505	0.00988595
Q61490	Alcam	0.733063	0.0288257	0.870987	0.0152203	0.78802	0.00185727	0.925944	0.000648705
Q61543	Glg1	0.264872	0.00666853	0.629004	0.0373535	0.189613	0.131404	0.553745	0.0674488
Q61545	Ewsr1	-0.840643	0.0368471	-0.152	0.378324	-0.697171	0.0842622	-0.00852776	0.968893
Q61548;Q61548-2;Q61548-3	Snap91	2.02097	0.00501511	2.11312	0.00360713	1.87476	0.000253711	1.9669	5.61025e-05
Q61553	Fscn1	-0.262521	0.178532	0.0391725	0.845343	-0.183315	0.247694	0.118379	0.517402
Q61584;Q61584-2;Q61584-3;Q61584-4;Q61584-5;Q61584-6;Q61584-7	Fxr1	0.185018	0.379465	0.595235	0.394581	-0.913836	0.106145	-0.503618	0.533728
Q61586	Gpam	1.28413	0.097946	0.339481	0.207242	0.729426	0.298881	-0.215228	0.456692
Q61595;Q61595-10;Q61595-11;Q61595-12;Q61595-13;Q61595-14;Q61595-15;Q61595-16;Q61595-2;Q61595-3;Q61595-4;Q61595-5;Q61595-6;Q61595-7;Q61595-8;Q61595-9	Ktn1	-1.35768	0.269661	-0.130659	0.849101	-1.05323	0.388583	0.173784	0.813887
Q61598;Q61598-2	Gdi2	-0.0931613	0.444108	-0.00403404	0.971273	0.0713488	0.408483	0.160476	0.0858665
Q61599	Arhgdib	1.26479	0.229999	1.13317	0.258482	1.09851	0.0746952	0.966888	0.0685121
Q61609	Slc20a1	2.18372	0.0200139	2.37771	0.0163138	1.99104	0.0116002	2.18503	0.00958453
Q61627	Grid1	1.41625	0.189267	1.66019	0.263451	1.00933	0.324519	1.25327	0.382659
Q61644	Pacsin1	0.917943	0.0156824	0.950125	0.012348	0.787228	0.00426095	0.81941	0.00242931
Q61646	Hp	1.18735	0.217569	2.26052	0.00620531	1.18425	0.207497	2.25742	0.00410173
Q61655	Ddx19a	0.354654	0.461887	0.983182	0.0174555	-0.0590668	0.896298	0.569461	0.0704989
Q61656	Ddx5	-0.687389	0.114061	-0.413907	0.142569	-0.651754	0.0891755	-0.378271	0.0570818
Q61672	Slc29a2	3.29544	0.0116851	4.1731	0.00203763	2.886	0.0136121	3.76366	0.0016868
Q61686	Cbx5	-1.37383	0.0109836	-0.831314	0.15721	-1.20844	0.0201165	-0.665921	0.244954
Q61699;Q61699-2	Hsph1	0.142604	0.305931	0.341691	0.0572194	0.0874519	0.559645	0.28654	0.118073
Q61701;Q61701-10;Q61701-11;Q61701-4;Q61701-5;Q61701-7;Q61701-9	Elavl4	-0.203038	0.400169	-0.294081	0.310772	-0.0761452	0.612191	-0.167189	0.433637
Q61704	Itih3	1.32737	0.204747	0.183474	0.838274	1.52963	0.0850335	0.385732	0.571028
Q61730-3	Il1rap	2.49345	0.0092607	3.01571	0.021685	2.20066	0.0140899	2.72292	0.0298447
Q61735	Cd47	2.67893	0.0119623	2.71242	0.00731075	2.43088	0.00318499	2.46436	0.000584591
Q61735-2	Cd47	2.61258	0.0344975	2.4795	0.0312871	0.591139	0.572348	0.458062	0.639546
Q61743	Kcnj11	3.52781	0.00600918	4.06185	0.00232688	2.92592	0.00631431	3.45996	0.00178171
Q61749;Q61749-2	Eif2b4	-1.30341	0.291612	0.200878	0.63654	-0.363201	0.750264	1.14109	0.0364348
Q61753	Phgdh	-0.433497	0.0895402	-0.269236	0.114255	-0.183688	0.297085	-0.0194276	0.762867
Q61768	Kif5b	0.83341	0.215401	0.470923	0.264164	0.754114	0.281097	0.391627	0.405036
Q61781	Krt14	-2.97632	0.340224	-2.10084	0.0763098	-2.89228	0.343772	-2.01681	0.0436282
Q61792	Lasp1	0.691098	0.0326204	0.901933	0.0256333	0.462962	0.0271191	0.673798	0.0277792
Q61831;Q61831-2;Q9WTU6;Q9WTU6-2;Q9WTU6-3;Q9WTU6-4	Mapk10;Mapk9	1.04114	0.13323	0.840668	0.429053	0.836128	0.197513	0.63566	0.539848
Q61838	Pzp	1.38493	0.0375139	0.921806	0.124361	1.51838	0.0371157	1.05526	0.109833
Q61851;Q61851-2	Fgfr3	1.48303	0.0862761	1.42566	0.0742949	0.597212	0.547808	0.539845	0.567611
Q61879	Myh10	-0.333329	0.00759544	-0.248056	0.0303479	-0.167371	0.0328494	-0.082098	0.261723
Q61885	Mog	1.47962	0.0139815	1.3008	0.0151417	1.24238	0.0128608	1.06356	0.0124073
Q61923	Kcna6	4.57601	0.00224032	5.3125	0.00175891	4.07506	0.000977456	4.81155	0.000933986
Q61937	Npm1	-1.06483	0.145933	-0.736482	0.245751	-0.0382045	0.954662	0.290145	0.646417
Q61941	Nnt	1.74788	0.0328432	0.243911	0.579067	1.56671	0.0658714	0.0627352	0.90702
Q61990;Q61990-2;Q61990-3	Pcbp2	-0.0896155	0.733954	-0.0592601	0.78618	-0.00420634	0.984924	0.0261491	0.876824
Q62048;Q62048-2	Pea15	0.335095	0.511426	0.24215	0.542213	0.168979	0.706981	0.0760336	0.813255
Q62059	Vcan	0.41061	0.24457	-0.501945	0.103942	0.532365	0.145154	-0.38019	0.175149
Q62077	Plcg1	0.937327	0.0420458	0.429682	0.541123	1.08074	0.0492382	0.57309	0.447281
Q62083	Pick1	0.333567	0.421639	0.540966	0.407517	0.150109	0.728492	0.357508	0.586212
Q62108;Q62108-2;Q62108-3	Dlg4	0.680847	0.00797868	0.833076	0.00969006	0.416419	0.0128672	0.568649	0.019125
Q62120	Jak2	-0.675326	0.162741	-0.736566	0.226034	-0.804898	0.035963	-0.866138	0.108089
Q62132;Q62132-2	Ptprr	2.20004	0.0912412	2.34764	0.172333	1.97254	0.0694979	2.12014	0.174694
Q62167	Ddx3x	-0.956464	0.226627	-0.0816164	0.534612	-0.986653	0.214474	-0.111805	0.390564
Q62172	Ralbp1	3.56586	0.00819853	3.10876	0.00549406	3.54084	0.0030881	3.08374	0.000586051
Q62178	Sema4a	2.8567	0.0209539	1.62319	0.130102	2.96387	0.00694949	1.73037	0.0646664
Q62179	Sema4b	-0.214696	0.793336	-0.139841	0.855524	-0.579638	0.250543	-0.504783	0.214746
Q62186	Ssr4	-0.379328	0.738995	1.16196	0.0660637	-0.773121	0.505724	0.768163	0.167013
Q62188	Dpysl3	-0.904319	0.0763152	-0.246759	0.237977	-0.668172	0.13216	-0.0106119	0.928022
Q62189	Snrpa	-0.473892	0.598042	-0.149714	0.873141	-0.753521	0.464817	-0.429342	0.683674
Q62203	Sf3a2	-0.84648	0.105197	-1.07922	0.0497815	-0.287678	0.368014	-0.520414	0.113989
Q62261	Sptbn1	0.849287	0.00204473	0.884417	0.00109687	0.869051	0.00221193	0.904181	0.0012466
Q62277	Syp	2.47047	0.0117103	2.83177	0.00512737	2.16571	0.00317783	2.527	0.000511241
Q62283	Tspan7	2.08433	0.066427	2.28185	0.0636616	2.26494	0.00300633	2.46246	0.00711686
Q62318	Trim28	-0.573803	0.0247167	-0.520832	0.0943133	-0.334846	0.302188	-0.281875	0.443606
Q62348	Tsn	1.37695	0.0461818	1.98396	0.00493166	0.866304	0.106602	1.47331	0.00461254
Q62351	Tfrc	0.584866	0.175035	0.589829	0.211836	0.620579	0.0291981	0.625542	0.0722557
Q62376	Snrnp70	-1.15806	0.166656	-0.960932	0.201512	-0.900051	0.249288	-0.702929	0.31337
Q62393;Q62393-2;Q62393-3	Tpd52	2.41465	0.0890052	2.71069	0.0890969	2.24966	0.0236153	2.54569	0.0386524
Q62407;Q62407-3;Q62407-4	Speg	2.9513	0.00482804	3.2123	0.0321549	2.43886	0.00245197	2.69986	0.0428006
Q62415	Ppp1r13b	1.82237	0.0158708	2.04512	0.0235509	1.70363	0.00272664	1.92637	0.0115923
Q62417	Sorbs1	0.202051	0.624557	0.404131	0.0898067	0.160781	0.682256	0.362861	0.0638506
Q62418;Q62418-2;Q62418-3	Dbnl	0.944444	0.478552	0.17174	0.680705	0.845086	0.517021	0.072382	0.833991
Q62419	Sh3gl1	3.00461	0.0583566	6.65143	0.00111017	2.64755	0.0401316	6.29436	4.03711e-05
Q62420	Sh3gl2	2.10183	0.0213646	2.27269	0.0160264	2.03873	0.000660447	2.2096	0.000363589
Q62421	Sh3gl3	3.76199	0.00586902	3.63177	0.0378057	3.47361	0.00115273	3.3434	0.0330073
Q62425	Ndufa4	0.540464	0.0343948	0.534164	0.0699502	0.324849	0.173442	0.318548	0.251182
Q62426	Cstb	0.828434	0.640214	2.24976	0.0848784	1.5747	0.384955	2.99603	0.0338106
Q62432;Q62432-2	Smad2	1.04329	0.170554	0.097702	0.695488	0.802109	0.250592	-0.143476	0.366783
Q62433	Ndrg1	1.25255	0.0923708	0.905011	0.126116	0.820458	0.120813	0.472923	0.151222
Q62442;Q62442-2	Vamp1	1.71932	0.0337986	0.86285	0.23993	1.60142	0.0150327	0.74495	0.211408
Q62443	Nptx1	-0.254132	0.116805	-0.0341206	0.902771	-0.192862	0.208764	0.0271498	0.922741
Q62446	Fkbp3	-0.416009	0.151752	-0.57836	0.11887	0.00546646	0.98343	-0.156885	0.630871
Q62448;Q62448-2	Eif4g2	0.705707	0.275726	1.60188	0.0807114	0.388474	0.519624	1.28465	0.13277
Q62452;Q6ZQM8	Ugt1a7;Ugt1a9	-0.2881	0.221758	0.00245253	0.997165	-0.478973	0.143589	-0.188421	0.792891
Q62465	Vat1	0.355378	0.167722	0.263938	0.246852	0.595355	0.0625867	0.503915	0.0815877
Q62523	Zyx	1.25433	0.275803	1.1941	0.055126	1.63065	0.141558	1.57041	2.19446e-05
Q63810;Q63810-2	Ppp3r1	-0.100753	0.0320559	0.170407	0.31526	-0.199303	0.284801	0.0718571	0.757391
Q63844	Mapk3	-0.409376	0.295661	-0.275454	0.254444	-0.556595	0.1276	-0.422674	0.0161301
Q63912	Omg	0.00413386	0.979594	-0.224674	0.194391	0.362405	0.0724292	0.133596	0.399231
Q63959	Kcnc3	3.40589	0.0266897	2.78525	0.0565624	3.13908	0.0340266	2.51844	0.0736394
Q64010	Crk	1.0808	0.0456428	1.61898	0.0531327	0.47847	0.360001	1.01665	0.194884
Q64096	Mcf2l	1.70885	0.00998015	1.91051	0.0208499	0.198605	0.687321	0.400265	0.529858
Q640M6	Gdpd5	2.40496	0.0313375	3.00636	0.029029	1.99791	0.0180565	2.59931	0.0236224
Q640P2-2	Angptl1	-0.520015	0.585428	1.60371	0.142505	-1.54091	0.21669	0.582808	0.609576
Q640R3	Hepacam	0.996235	0.1382	0.980789	0.0754576	0.674912	0.240017	0.659466	0.127395
Q64105	Spr	0.0367762	0.875145	-0.256849	0.216165	-0.0887432	0.674354	-0.382368	0.0571265
Q64133	Maoa	0.286315	0.182938	0.263868	0.098892	0.212906	0.32572	0.190459	0.246258
Q64152;Q64152-2	Btf3	-1.97621	0.252112	-0.133307	0.792569	-2.33403	0.204751	-0.491127	0.490635
Q641K1;Q641K1-2	Agtpbp1	1.77362	0.0674787	2.79402	0.00496092	1.47877	0.0566044	2.49917	0.000373943
Q641P0	Actr3b	0.346846	0.0775676	0.727893	0.0483279	0.420958	0.0552674	0.802005	0.0389092
Q64213;Q64213-2;Q64213-3	Sf1	-0.526129	0.404955	0.313192	0.720017	-1.6277	0.0525888	-0.788377	0.399064
Q64310	Surf4	0.0638549	0.886859	2.08824	0.163697	-0.282766	0.453885	1.74162	0.22055
Q64331	Myo6	-0.392248	0.491519	-0.26931	0.189317	-0.173402	0.751284	-0.0504649	0.744965
Q64332	Syn2	1.41686	0.011239	1.4787	0.0106968	1.32754	0.00198014	1.38939	0.00225375
Q64343	Abcg1	3.50431	0.0248717	3.83782	0.00778038	2.97846	0.0306177	3.31197	0.00713096
Q64362	Aktip	0.0792545	0.892634	0.182011	0.774747	-0.319109	0.647663	-0.216352	0.767622
Q64373;Q64373-2;Q64373-3;Q64373-4	Bcl2l1	1.56622	0.0390899	2.26484	0.00587047	1.69642	0.0334865	2.39504	0.00558489
Q64378	Fkbp5	-0.17393	0.869038	-0.404257	0.712237	-0.509726	0.676667	-0.740052	0.558877
Q64433	Hspe1	-0.0387713	0.821013	-0.326913	0.165404	-0.236701	0.129675	-0.524843	0.0329198
Q64436	Atp4a	1.4468	0.0615409	1.72383	0.0217742	1.29682	0.148284	1.57385	0.0752037
Q64442	Sord	-0.0263418	0.983447	0.93479	0.389509	0.447995	0.611793	1.40913	0.0292767
Q64444	Ca4	1.37218	0.062305	1.06403	0.0563247	0.537731	0.401681	0.229583	0.637066
Q64455	Ptprj	3.27867	0.0173127	4.47596	0.0295545	2.86297	0.0133566	4.06026	0.03201
Q64487;Q64487-12;Q64487-5	Ptprd	0.305298	0.0116229	0.296811	0.0272086	0.306826	0.000808488	0.298339	0.00898046
Q64511	Top2b	0.54359	0.548595	0.895952	0.524235	0.734007	0.306878	1.08637	0.403685
Q64514-2	Tpp2	-0.0889753	0.599121	-0.0320498	0.89166	0.111458	0.574102	0.168384	0.521924
Q64516;Q64516-1;Q64516-2	Gk	0.931906	0.115393	0.424033	0.0255194	0.996552	0.101285	0.488679	0.0256069
Q64519	Sdc3	5.0483	0.000551454	4.23545	0.000267896	3.24081	0.0025323	2.42796	0.0015995
Q64520;Q64520-2	Guk1	0.394671	0.364906	0.401013	0.499344	0.477121	0.258541	0.483463	0.408153
Q64521	Gpd2	-0.189336	0.403835	-0.269384	0.213199	-0.0841338	0.49066	-0.164182	0.0658856
Q64523;Q6GSS7	H2ac20;Hist2h2aa1	-1.28139	0.192199	-0.192762	0.824169	-2.37672	0.104317	-1.28809	0.318394
Q64524;Q8CGP0;Q9D2U9	H2bc21;H2bu1;H2bu2	-0.558523	0.827282	1.75869	0.523858	-1.14868	0.687844	1.16854	0.694696
Q64674	Srm	-0.468429	0.265353	0.0620324	0.623596	-0.394496	0.344292	0.135966	0.36982
Q64676	Ugt8	0.854309	0.395599	1.55062	0.249634	0.132775	0.888805	0.82909	0.509696
Q64727	Vcl	-1.01123	0.297747	-0.572961	0.00272838	-1.01175	0.302153	-0.573481	0.0201091
Q64735;Q64735-2	Cr1l	2.57709	0.0469707	3.78287	0.0133856	2.21488	0.0153816	3.42066	0.00282597
Q64737	Gart	-0.726542	0.0303498	-0.482211	0.24462	-0.545168	0.0398686	-0.300836	0.414267
Q66L42	Map3k10	3.95708	0.00266298	3.55278	0.0057383	3.59571	0.000438854	3.19141	0.00192514
Q66L44	Cbarp	2.73525	0.00959013	2.60922	0.0244372	1.90625	0.013718	1.78022	0.049968
Q67BT3	Slc13a5	3.25206	0.019166	1.74129	0.0974286	3.29276	0.00956083	1.78199	0.0509481
Q68ED2	Grm7	2.5265	0.00554801	1.43759	0.344725	2.20396	0.00197225	1.11505	0.438346
Q68EF4	Grm4	3.9738	0.00827383	3.94733	0.0052941	3.59983	0.00294836	3.57336	0.000816833
Q68EF6	Begain	1.74648	0.364223	2.38461	0.160872	0.728746	0.684288	1.36688	0.363975
Q68FD5	Cltc	0.0185954	0.816805	0.100545	0.189215	0.171905	0.0837853	0.253855	0.0161375
Q68FD9	Kiaa1549	4.14465	0.0366262	3.42224	0.0800849	3.98114	0.0305812	3.25874	0.0735722
Q68FE2	Atg9a	2.83905	0.019532	2.81415	0.00870606	2.63978	0.00850693	2.61488	0.000739922
Q68FE6	Ripor1	0.300735	0.731422	0.693873	0.391315	0.203974	0.871826	0.597112	0.623202
Q68FE7	Tmem151b	0.932307	0.264891	0.112639	0.864324	0.213272	0.727255	-0.606396	0.235803
Q68FF6	Git1	0.917641	0.0543767	0.994128	0.0328022	0.764973	0.00591812	0.841461	9.40077e-06
Q68FH0;Q68FH0-2	Pkp4	1.20481	0.0625675	1.27033	0.0528205	1.10563	0.00685672	1.17114	0.0048086
Q68FL4	Ahcyl2	0.251468	0.190968	0.0475785	0.814322	0.324902	0.0857795	0.121012	0.529076
Q68FL6	Mars1	1.58026	0.391724	-0.00498263	0.971685	1.61641	0.380762	0.0311613	0.469238
Q68FM6	Elfn2	3.01553	0.0626693	2.69544	0.0112283	2.45649	0.0809459	2.1364	0.0023897
Q692V3-2	Ttc41	-2.67342	0.225623	-0.0268854	0.988217	-3.40248	0.165896	-0.755946	0.70614
Q69Z26;Q69Z26-2	Cntn4	0.921961	0.148343	1.45708	0.111309	0.796887	0.196537	1.332	0.135771
Q69Z38	Peak1	2.21014	0.0762786	1.69226	0.131214	1.86308	0.0550054	1.3452	0.105256
Q69Z98;Q69Z98-2;Q69Z98-3;Q69Z98-4	Brsk2	3.72597	0.00916649	3.84838	0.00287183	3.33751	0.00819965	3.45992	0.00143846
Q69ZF3	Gba2	0.353482	0.575297	1.09987	0.145291	0.145101	0.787021	0.891488	0.17123
Q69ZH9	Arhgap23	1.20051	0.0298751	1.46282	0.0251528	0.815826	0.000239869	1.07814	0.00790577
Q69ZK0	Prex1	-0.413218	0.293317	-0.301356	0.295138	0.00587336	0.984996	0.117736	0.546521
Q69ZK9	Nlgn2	1.26723	0.00566713	1.2596	0.00510085	1.01405	0.00300012	1.00642	0.00227747
Q69ZR2	Hectd1	0.515039	0.53264	0.619749	0.52429	-0.343541	0.660868	-0.238831	0.796163
Q69ZS6	Sv2c	1.76146	0.014064	3.34029	0.0589262	1.77687	0.00638186	3.3557	0.0550755
Q69ZS7;Q69ZS7-2	Hbs1l	-0.401556	0.702723	-0.167822	0.849599	-0.682911	0.335302	-0.449176	0.263566
Q69ZS8;Q69ZS8-2;Q69ZS8-3	Kazn	-0.30142	0.354157	0.055081	0.889728	-1.16363	0.000216852	-0.807124	0.0336128
Q69ZU6	Thsd7a	1.29293	0.321462	-0.566402	0.131665	1.1913	0.355755	-0.668028	0.0847806
Q69ZW3;Q69ZW3-2	Ehbp1	3.11131	0.0376433	4.90576	0.0114538	2.77577	0.0300464	4.57021	0.00860591
Q69ZX8	Ablim3	1.45803	0.101666	2.35748	0.0380682	0.456731	0.31602	1.35618	0.0632536
Q69ZZ6	Tmcc1	1.0918	0.21731	3.6482	0.00163537	1.09635	0.188081	3.65276	0.000739404
Q6A039	Tbc1d12	0.968809	0.0744315	1.60501	0.0618005	-0.759928	0.335977	-0.123728	0.890356
Q6A044	Fam189a1	1.5624	0.259811	1.5937	0.211449	1.35089	0.135031	1.38219	0.0517957
Q6A065	Cep170	1.35213	0.206488	0.261108	0.440228	1.13651	0.253935	0.0454849	0.737623
Q6A0A9	FAM120A	-0.510958	0.121351	-0.195232	0.588336	-0.233895	0.423	0.0818307	0.818333
Q6A4J8;Q6A4J8-2;Q6A4J8-3	Usp7	-1.11453	0.308562	-0.0639769	0.788884	-1.08413	0.317122	-0.0335681	0.869157
Q6AXF6	Sidt1	2.41853	0.0168899	2.17793	0.0334203	2.26362	0.00711242	2.02302	0.0199663
Q6DFV3	Arhgap21	3.64681	0.00244337	4.7093	0.00650538	3.20133	0.00059046	4.26383	0.00591483
Q6DFV7	Ncoa7	3.22475	0.00813355	3.72727	0.000911806	2.75465	0.00769649	3.25718	0.000134072
Q6DFW0;Q6DFW0-2	C9orf72	0.177864	0.790882	0.682834	0.400855	0.118239	0.752298	0.623209	0.286585
Q6DFW4	Nop58	-0.787338	0.170953	-0.841963	0.153775	-0.536025	0.0523577	-0.590651	0.0495215
Q6DFW5	Atp11b	-0.256826	0.754492	-0.0278298	0.975611	-0.273873	0.432623	-0.0448774	0.931823
Q6EDY6;Q6EDY6-3	Carmil1	1.36187	0.161387	1.18499	0.278795	1.1046	0.0809961	0.92772	0.256547
Q6GQS1	Slc25a23	0.0597553	0.948922	0.410832	0.274659	-0.526524	0.581609	-0.175447	0.625591
Q6GQT5	Tmem151a	0.659566	0.718935	1.96373	0.220921	1.34079	0.286341	2.64495	0.00137015
Q6GQT9	Nomo1	-0.188744	0.302806	0.0396563	0.825884	-0.0231702	0.906098	0.20523	0.346291
Q6GV12	Kdsr	3.80681	0.0023044	2.83553	0.00853036	2.52361	0.0867953	1.55234	0.243591
Q6GYP7;Q6GYP7-2	Ralgapa1	2.18198	0.0095899	2.1101	0.015471	1.81915	0.00213376	1.74727	0.00712575
Q6IEE6	Tmem132e	0.20516	0.776251	0.576588	0.385082	-0.147491	0.844182	0.223937	0.737976
Q6IFX2	Krt42	-2.7359	0.42443	-1.69226	0.107945	-2.81536	0.399075	-1.77173	0.00552753
Q6IFZ6	Krt77	-2.08359	0.371383	-0.00267124	0.999215	-2.7691	0.103	-0.688174	0.746526
Q6IME9	Krt72	-2.96891	0.291001	-1.59415	0.23606	-2.52246	0.316236	-1.1477	0.0627322
Q6IMP4;Q6IMP4-2	Panx2	3.92928	0.00506926	3.64018	0.00693359	2.76481	0.000952983	2.47571	0.00176523
Q6IRU5;Q6IRU5-2	Cltb	0.0216649	0.839784	0.166219	0.27682	-0.0210772	0.879119	0.123477	0.472497
Q6KAR6	Exoc3	2.50685	0.113087	2.09265	0.0437686	2.19052	0.13914	1.77632	0.0476124
Q6NS52;Q6NS52-2	Dgkb	-0.128653	0.303184	0.0764211	0.799614	-0.038215	0.757983	0.166859	0.588968
Q6NS60	Fbxo41	-0.080568	0.709083	-0.033824	0.912192	0.113121	0.590277	0.159865	0.602191
Q6NSR8	Npepl1	-1.37776	0.3232	0.203004	0.654551	-1.8811	0.209296	-0.300341	0.589658
Q6NTA4;Q80X95	Rraga;Rragb	-0.0495853	0.926574	0.677486	0.428504	0.219597	0.563163	0.946668	0.234736
Q6NVE8	Wdr44	2.75696	0.00651279	2.65085	0.0432529	2.59718	0.00118567	2.49107	0.035968
Q6NVE9;Q6NVE9-2	Pptc7	-0.267141	0.544721	0.246633	0.70975	0.143302	0.677187	0.657075	0.30967
Q6NVF0	Ocrl	1.47023	0.00287586	1.42591	0.0157894	1.41872	7.55583e-05	1.37441	0.00858773
Q6NVG1	Lpcat4	1.70589	0.012973	2.32428	0.00530466	1.50403	0.00180949	2.12242	0.000978229
Q6NXH9	Krt73	-3.37492	0.242671	-1.74371	0.0123183	-2.60304	0.353346	-0.971822	0.121845
Q6NXK7	Dpp10	2.1244	0.00650957	2.40808	0.00415515	1.81101	0.00420137	2.09469	0.00247147
Q6NXK8	Asic1	1.11853	0.205424	1.0222	0.16028	-0.207256	0.696972	-0.303587	0.243623
Q6NY15	Tsga10	0.0210368	0.98848	-1.41918	0.00352169	-0.367204	0.801087	-1.80742	0.000748936
Q6NZC7	Sec23ip	-0.60818	0.167644	-0.490547	0.195397	-0.205424	0.707785	-0.0877908	0.863504
Q6NZJ6;Q6NZJ6-2	Eif4g1	0.489438	0.25773	0.965936	0.0150594	0.733389	0.0828344	1.20989	0.00100188
Q6NZL0	Soga3	0.65036	0.0116391	0.902111	0.0132385	0.494669	0.117539	0.746421	0.0628824
Q6P069;Q6P069-2	Sri	-0.745257	0.130184	-0.55131	0.0181283	-0.729556	0.145191	-0.535609	0.03603
Q6P1B1	Xpnpep1	0.23809	0.160553	0.562344	0.0244847	0.303288	0.0588318	0.627542	0.0111516
Q6P1D5;Q6P1D5-2	Sez6l	1.20559	0.0134855	1.03898	0.120565	0.997354	0.0387828	0.830748	0.207362
Q6P1F6	Ppp2r2a	-0.537255	0.207801	0.0109564	0.95298	-0.335125	0.403639	0.213086	0.295234
Q6P2B1	Tnpo3	0.793465	0.167966	1.26045	0.00106026	0.35848	0.478015	0.825466	0.0011003
Q6P2K6;Q6P2K6-2	Ppp4r3a	0.568154	0.38187	0.855241	0.151165	-1.0338	0.0585327	-0.746715	0.0317811
Q6P3A8;Q6P3A8-2	Bckdhb	0.237131	0.881339	0.151475	0.925661	1.71173	0.0936232	1.62607	0.126529
Q6P4S6	Sik3	0.304577	0.107534	0.135747	0.361369	0.60078	0.030977	0.43195	0.0659164
Q6P4T2	Snrnp200	0.00167147	0.994868	-0.0223831	0.951195	0.235862	0.318942	0.211807	0.542459
Q6P542	Abcf1	-0.65896	0.60827	0.095149	0.847894	-0.859857	0.513529	-0.105748	0.842882
Q6P5B0	Rrp12	-0.27898	0.671182	0.413632	0.635719	-0.303751	0.633611	0.388861	0.649484
Q6P5D4	Cep135	-2.49026	0.155015	-1.3598	0.195683	-1.83315	0.181515	-0.702685	0.0159924
Q6P5E4	Uggt1	-0.649187	0.242618	0.136509	0.623061	-0.553725	0.303733	0.231971	0.403779
Q6P5E8	Dgkq	1.03875	0.0385922	0.988696	0.0476414	1.05049	0.0076834	1.00043	0.0111252
Q6P5F6	Slc39a10	4.67371	0.00269064	5.40622	0.00125797	3.98138	0.00611744	4.71389	0.00275899
Q6P5F7	Ttyh3	2.28514	0.0225289	3.1383	0.00787089	1.96511	0.0161711	2.81827	0.00475289
Q6P5F9	Xpo1	0.497018	0.356084	1.45524	0.0116205	0.176383	0.649656	1.13461	0.000423019
Q6P5U7	Nwd2	1.60192	0.0529845	1.57564	0.0135297	1.43995	0.0637477	1.41367	0.013719
Q6P6I6;Q6P6I6-2	Polr2m	0.834014	0.13558	0.746676	0.17176	-0.0611038	0.95525	-0.148441	0.891773
Q6P6N5	Spred3	0.308395	0.0756796	0.378158	0.193964	-0.570804	0.446227	-0.501041	0.517523
Q6P8I4	Pcnp	3.1342	0.010418	2.61232	0.00276785	2.42825	0.0203362	1.90637	0.00436369
Q6P8X1	Snx6	1.04093	0.426257	2.29551	0.163201	0.544787	0.675675	1.79937	0.260569
Q6P9K8;Q6P9K8-2;Q6P9K8-3	Caskin1	0.869371	0.0857494	0.876733	0.0815301	0.828093	0.000512476	0.835454	0.000121367
Q6P9K9	Nrxn3	0.87388	0.017557	0.877199	0.0179048	0.748908	0.0026039	0.752227	0.00294893
Q6P9N1	Fam126a	0.704637	0.10305	1.32848	0.0433094	-0.42321	0.069935	0.20063	0.600508
Q6P9R2	Oxsr1	1.74306	0.0274534	2.09923	0.0182443	1.53916	0.0058633	1.89532	0.00506021
Q6P9S0	Mtss2	0.555153	0.272312	1.37982	0.0367232	0.560541	0.130437	1.38521	0.0111879
Q6PA06	Atl2	2.36962	0.00245477	1.86032	0.0548218	2.21339	0.00274653	1.70409	0.0678689
Q6PAJ1	Bcr	2.06263	0.12941	1.20171	0.0288387	1.79504	0.158981	0.934121	0.00806218
Q6PAK3	Prmt8	3.35801	0.00586897	4.69677	0.000782423	2.83496	0.00664416	4.17372	0.000529932
Q6PAL8	Dennd5a	-1.38596	0.338248	-1.53754	0.278081	-0.174342	0.713381	-0.325918	0.291113
Q6PAM0	Prkab2	1.22463	0.47164	-0.313718	0.823521	0.96558	0.535941	-0.572763	0.653194
Q6PAR5;Q6PAR5-2;Q6PAR5-4;Q6PAR5-5;Q6PAR5-6	Gapvd1	1.05648	0.00157595	1.03577	0.0591355	1.01839	0.0024538	0.997677	0.0673503
Q6PAV2;Q6PAV2-2	Herc4	-0.260825	0.735548	-0.143214	0.873189	-0.0958519	0.874955	0.021759	0.977306
Q6PB44;Q6PB44-2	Ptpn23	-0.109908	0.813303	0.381195	0.298848	-0.160697	0.682846	0.330406	0.197412
Q6PB66	Lrpprc	-0.532205	0.0130587	-0.512275	0.0146664	-0.421705	0.00594044	-0.401775	0.00682713
Q6PB70	Ano8	1.08257	0.144553	0.549385	0.437122	1.29135	0.0360492	0.758167	0.182166
Q6PB90;Q91XZ4	Pcdhb14;Pcdhb6	3.49697	0.0038972	3.46617	0.0016523	2.84515	0.00201298	2.81435	7.57013e-05
Q6PCP5	Mff	3.54384	0.00685473	1.93044	0.0660996	3.42242	0.00706419	1.80902	0.074199
Q6PD03	Ppp2r5a	1.82225	0.040265	3.50127	0.00150425	1.37153	0.0768245	3.05055	0.00175663
Q6PD10	Ip6k1	0.412587	0.402112	0.875845	0.173238	-1.00214	0.25907	-0.538881	0.545513
Q6PD19	Armh3	0.605671	0.483539	0.302347	0.840835	0.29388	0.647936	-0.00944392	0.994616
Q6PD21	Shb	2.32246	0.0850483	3.77304	0.0301091	2.43049	0.00200356	3.88107	0.00336324
Q6PD26	Pigs	1.92369	0.0357902	1.89862	0.0236491	1.4271	0.0634863	1.40202	0.0394928
Q6PD28	Ppp2r5b	2.01223	0.014257	3.52411	0.000572103	1.60923	0.0110568	3.12111	2.43412e-05
Q6PDC0	Rundc3b	1.81171	0.0187669	2.63849	0.00252098	1.23728	0.0467304	2.06406	0.00384219
Q6PDC8	Mfsd4a	4.17373	0.011347	5.2573	0.00154107	3.68298	0.0114568	4.76654	0.000818075
Q6PDI5;Q6PDI5-2	Ecpas	0.256425	0.222853	0.290005	0.247415	0.47204	0.029049	0.50562	0.0525686
Q6PDL0	Dync1li2	0.691505	0.081806	0.942845	0.0305312	0.494609	0.0173772	0.745948	0.00149151
Q6PDM2	Srsf1	-0.582581	0.0613443	-0.275528	0.215828	-0.57787	0.0284348	-0.270816	0.0828989
Q6PDN3;Q6PDN3-3	Mylk	1.13575	0.233571	0.914063	0.222379	-0.865005	0.342861	-1.08669	0.157656
Q6PDS3;Q6PDS3-2;Q6PDS3-3	Sarm1	-0.536608	0.282889	-0.525359	0.349656	-0.000612895	0.998416	0.0106363	0.978932
Q6PDY2	Ado	0.732715	0.0772252	0.373781	0.176147	0.577738	0.0992319	0.218804	0.267392
Q6PE01	Snrnp40	0.100876	0.892817	0.951852	0.170367	0.474831	0.767175	1.32581	0.409586
Q6PE13	Prrt3	4.61932	0.00527577	3.45442	0.184103	4.25571	0.00218422	3.09081	0.210719
Q6PE15;Q6PE15-2	Abhd10	0.847023	0.37984	-0.199584	0.371535	0.724753	0.439186	-0.321854	0.0587599
Q6PEB6	Mob4	-0.199883	0.324921	-0.00709724	0.982994	-0.23036	0.141347	-0.0375748	0.901956
Q6PEE2;Q6PEE2-2	Ctif	0.399735	0.600935	0.147458	0.799598	-0.844687	0.422565	-1.09697	0.258399
Q6PER3	Mapre3	0.296999	0.049045	0.159474	0.375633	0.252637	0.018436	0.115112	0.447004
Q6PF93;Q6PF93-2	Pik3c3	0.449773	0.455984	1.49058	0.160558	0.255079	0.657067	1.29589	0.205746
Q6PFD5	Dlgap3	0.503786	0.217356	1.0108	0.0546256	0.228477	0.266804	0.735487	0.0339484
Q6PFE7;Q6PFE7-2;Q6PFE7-3	Tmeff1	1.43624	0.157443	1.70503	0.0492595	0.785927	0.366732	1.05472	0.120182
Q6PFX7;Q6PFX7-2;Q6PFX7-3	Nyap1	1.2839	0.0892868	0.56081	0.149476	0.491655	0.416718	-0.231434	0.411575
Q6PGC1	Dhx29	-0.00606314	0.98759	0.607385	0.430195	0.209154	0.546417	0.822603	0.285895
Q6PGE7	Slc6a7	3.43057	0.0281626	3.989	0.0333423	3.36295	0.0132116	3.92138	0.0218289
Q6PGF2	Morn4	-0.514469	0.554795	0.0909204	0.915753	-0.267917	0.384131	0.337472	0.319468
Q6PGF7	Exoc8	1.19806	0.0318549	1.85762	0.0386565	0.88059	0.0382502	1.54016	0.0531908
Q6PGL7;Q6PGL7-2	Washc2	-1.29422	0.41022	0.617272	0.464702	-0.692247	0.634101	1.21925	0.130033
Q6PGN3;Q6PGN3-2;Q6PGN3-3;Q6PGN3-4;Q6PGN3-5;Q6PGN3-6	Dclk2	0.0141144	0.927558	-0.00359917	0.978383	0.0758483	0.645429	0.0581347	0.684133
Q6PH08	Erc2	0.948146	0.0709632	1.06008	0.0671833	0.718211	0.00426632	0.830144	0.0174257
Q6PHN9	Rab35	0.272385	0.285577	0.692952	0.0117336	-0.142156	0.538534	0.278412	0.125196
Q6PHQ8	Naa35	1.93474	0.0715357	1.90186	0.0673021	1.62933	0.0560945	1.59645	0.0488046
Q6PHS9;Q6PHS9-2;Q6PHS9-3;Q6PHS9-4;Q6PHS9-5;Q6PHS9-6	Cacna2d2	0.585131	0.0324244	0.0128024	0.945008	0.570141	0.0415722	-0.00218805	0.991154
Q6PHU5;Q6PHU5-2	Sort1	1.56923	0.0713985	1.19124	0.00200251	1.3997	0.0900786	1.02171	0.000400934
Q6PHZ2;Q6PHZ2-2;Q6PHZ2-4;Q6PHZ2-5	Camk2d	-0.521878	0.181768	-0.0496368	0.665473	-0.342443	0.344878	0.129798	0.248495
Q6PIC6	Atp1a3	2.51268	0.00458034	2.69872	0.00236652	2.27576	0.00234183	2.4618	0.000790802
Q6PIE5	Atp1a2	1.82138	0.00289402	1.76276	0.00261151	1.69982	0.0110633	1.64121	0.0111853
Q6PNC0	Dmxl1	-0.263979	0.702225	-0.67254	0.359832	-0.920995	0.0418946	-1.32956	0.0155716
Q6Q477;Q6Q477-2	Atp2b4	2.37351	0.0094312	2.76963	0.00421842	1.90236	0.00458737	2.29848	0.00113559
Q6R891	Ppp1r9b	-0.0818119	0.571144	-0.0287024	0.78743	-0.304747	0.0741385	-0.251637	0.0513161
Q6RHR9;Q6RHR9-3	Magi1	2.68131	0.0412394	2.75997	0.0294259	2.27366	0.0542928	2.35232	0.0372325
Q6RI63	Fam120b	2.92375	0.00859447	1.88582	0.294653	0.881409	0.383842	-0.156516	0.931114
Q6TEK5	Vkorc1l1	1.79246	0.238844	0.478533	0.1775	1.36006	0.356777	0.0461311	0.897872
Q6URW6;Q6URW6-2;Q6URW6-3	Myh14	0.556273	0.721489	0.0568047	0.829334	0.581182	0.708438	0.0817137	0.703986
Q6V4S5	Sdk2	3.52327	0.0198336	5.10993	0.00227596	3.05802	0.00741336	4.64469	1.64405e-05
Q6VNB8	Wdfy3	0.934605	0.0460843	1.40706	0.160277	0.627944	0.0846229	1.10039	0.239995
Q6VNS1	Ntrk3	3.12196	0.0350405	2.13196	0.136205	3.07005	0.0428013	2.08004	0.155554
Q6WKZ8;Q6WKZ8-2	Ubr2	0.191067	0.489043	1.07364	0.206551	0.548604	0.477736	1.43118	0.213348
Q6WQJ1	Dagla	-0.758239	0.521652	-0.294731	0.518833	-1.00689	0.405965	-0.543382	0.273033
Q6WVG3	Kctd12	-0.379667	0.388327	0.0347595	0.798285	-0.197708	0.643474	0.216718	0.186498
Q6X893;Q6X893-2	Slc44a1	2.03466	0.00934325	1.85883	0.00819552	1.79375	0.00830051	1.61793	0.00618892
Q6Y685	Tacc1	2.34035	0.0129664	2.0613	0.0158947	2.33847	0.00284804	2.05943	0.00240813
Q6ZPE2;Q6ZPE2-2	Sbf1	1.20573	0.0128649	1.33028	0.015747	0.922471	0.00472444	1.04702	0.0114414
Q6ZPF3;Q6ZPF3-2;Q6ZPF3-3	Tiam2	3.15817	0.0141404	3.37541	0.00672923	2.71649	0.00830479	2.93373	0.0019664
Q6ZPJ0	Tex2	0.721173	0.26622	1.39259	0.182321	-0.487764	0.524439	0.183652	0.85786
Q6ZPJ3	Ube2o	0.117475	0.54348	0.259036	0.324636	0.300456	0.115291	0.442018	0.103768
Q6ZPQ6;Q6ZPQ6-2	Pitpnm2	0.342243	0.818952	1.04094	0.429437	-0.0334663	0.984813	0.665233	0.6753
Q6ZPR4	Kcnt1	2.55101	0.0658447	3.88705	0.0189674	1.95209	0.0527228	3.28813	0.0104969
Q6ZQ08;Q6ZQ08-2;Q6ZQ08-4	Cnot1	0.382614	0.419079	0.876576	0.0782138	0.219634	0.533799	0.713596	0.0459091
Q6ZQ18;Q6ZQ18-2	Efr3b	2.34536	0.00469667	2.75212	0.00224696	1.95275	0.000622337	2.35952	0.000138897
Q6ZQ29;Q6ZQ29-2	Taok2	1.04956	0.188176	2.19748	0.120606	-0.189304	0.897965	0.95861	0.592969
Q6ZQ38	Cand1	0.628685	0.00551336	0.681852	0.00193643	0.760493	0.0026956	0.81366	0.000961929
Q6ZQ58	Larp1	0.202385	0.299447	-0.206333	0.350678	0.246061	0.0338773	-0.162657	0.259655
Q6ZQ73	Cand2	1.26101	0.0200805	0.851617	0.0443581	1.5654	0.00903762	1.156	0.0156713
Q6ZQ82	Arhgap26	1.1718	0.0454675	0.901148	0.00980642	1.0629	0.0494164	0.792249	0.00352136
Q6ZQ89	Marchf6	1.34828	0.145955	-0.147135	0.742249	-1.01274	0.509447	-2.50815	0.116214
Q6ZQI3	Mlec	0.502513	0.17385	1.67263	0.145881	0.375713	0.303372	1.54583	0.172862
Q6ZQK5	Acap2	3.21286	0.00868583	4.26834	0.0295394	2.85968	0.00416441	3.91516	0.0311896
Q6ZWM4	Lsm8	-0.888741	0.132565	0.213041	0.752631	-2.19362	0.0151487	-1.09184	0.184774
Q6ZWN5	Rps9	-0.990461	0.204862	-0.482186	0.377445	-0.847062	0.26152	-0.338787	0.517413
Q6ZWQ7	Spcs3	-0.605647	0.766314	1.2567	0.503527	-1.93219	0.333144	-0.0698449	0.966138
Q6ZWR6;Q6ZWR6-4	Syne1	-1.01558	0.193388	-0.407671	0.541228	-0.417292	0.500238	0.190612	0.731546
Q6ZWU9	Rps27	1.19142	0.345589	1.49312	0.260608	1.73603	0.187647	2.03773	0.142815
Q6ZWV3	Rpl10	-0.153038	0.667157	0.205491	0.568647	0.269327	0.305388	0.627856	0.052984
Q6ZWV7	Rpl35	-0.735274	0.323132	-0.689724	0.320981	-0.703272	0.366569	-0.657721	0.369088
Q6ZWX6	Eif2s1	-1.16977	0.154513	-0.205733	0.576235	-1.15448	0.117429	-0.190441	0.0659226
Q711T7	Nadsyn1	-1.36282	0.377003	0.295101	0.548486	-2.05657	0.243987	-0.398654	0.630848
Q71LX4	Tln2	-0.0952333	0.610501	-0.0513442	0.787831	0.149556	0.3795	0.193446	0.288332
Q71M36	Cspg5	2.73146	0.0135175	3.63262	0.00939285	2.16704	0.0159921	3.0682	0.0111411
Q71RI9;Q71RI9-2	Kyat3	-0.23343	0.612569	0.761813	0.578196	0.103042	0.776981	1.09829	0.423822
Q761V0;Q761V0-2	Slc6a5	1.3686	0.088832	2.08831	0.00473226	0.35254	0.680893	1.07225	0.163304
Q76HP3	Tmem132d	-1.2213	0.236391	-1.31425	0.24083	-0.097167	0.841242	-0.19011	0.763699
Q76LS9;Q76LS9-2	Mindy1	1.48419	0.160408	1.27791	0.216905	1.71269	0.000725617	1.50641	0.00261669
Q76MZ3	Ppp2r1a	-0.264149	0.0579487	-0.165497	0.281822	-0.0270437	0.781129	0.0716082	0.601099
Q78HU3	Mvb12a	2.39935	0.0339291	1.14224	0.155982	1.30912	0.20081	0.0520109	0.949147
Q78IK2	Atp5mk	1.96329	0.0147185	1.8029	0.0131412	1.70126	0.0138022	1.54086	0.0107179
Q78IK4	Apool	1.03683	0.151656	1.62658	0.208497	1.05997	0.129373	1.64973	0.197966
Q78J03	Msrb2	-0.339475	0.76601	-3.19027	0.0389684	0.79656	0.25211	-2.05423	0.0233965
Q78JE5	Fbxo22	0.803027	0.282366	0.478589	0.161031	0.717275	0.3332	0.392838	0.247854
Q78PY7	Snd1	-0.543084	0.0603903	0.114423	0.346161	-0.367476	0.142544	0.29003	0.0338518
Q78T54;Q78T54-2	Vma21	4.57691	4.76011e-06	1.58177	0.311231	4.22661	1.90612e-05	1.23146	0.419724
Q78T81	Fam102a	1.0912	0.340503	1.76287	0.189157	0.800152	0.302824	1.47182	0.149719
Q78XF5	Ostc	1.95457	0.177726	1.53428	0.260479	1.73069	0.0946089	1.31041	0.157667
Q78ZA7	Nap1l4	0.465795	0.169024	0.945343	0.0643341	0.203961	0.448435	0.683509	0.120737
Q791T5;Q791T5-2	Mtch1	2.09469	0.0146258	2.04125	0.0205001	1.61951	0.00897985	1.56607	0.0171414
Q791V5	Mtch2	1.8639	0.0251116	1.70949	0.0123405	1.24801	0.0393841	1.0936	0.00595924
Q7M6Y3-5	Picalm	2.06746	0.0157485	2.51033	0.00573028	1.6431	0.00386605	2.08597	0.00024477
Q7M750	Opalin	0.216738	0.751449	-0.0694091	0.937638	-0.048694	0.940992	-0.334841	0.703196
Q7SIG6	Asap2	3.34292	0.003626	1.38115	0.06738	2.94745	0.000257734	0.98567	0.0187164
Q7TMB8	Cyfip1	1.07136	0.0357706	1.31391	0.0203408	0.766267	0.0202734	1.00882	0.00998603
Q7TMC8	Fcsk	1.22718	0.0708153	1.44895	0.0115224	0.801244	0.216011	1.02302	0.059367
Q7TME0	Plppr4	1.57254	0.0539397	1.81305	0.0122139	1.37966	0.0597313	1.62016	0.0089463
Q7TMF3	Ndufa12	0.3182	0.180499	0.0470928	0.834585	0.0554371	0.763895	-0.215671	0.318078
Q7TMK9;Q7TMK9-2	Syncrip	-0.656159	0.0788269	-0.217927	0.09526	-0.69207	0.0730812	-0.253838	0.0975867
Q7TMM9	Tubb2a	-0.488224	0.178864	-0.476878	0.187955	-0.345174	0.00236456	-0.333827	0.00370328
Q7TMQ7	Wdr91	0.316593	0.637233	2.07402	0.00978879	0.290715	0.676236	2.04814	0.0131609
Q7TMS5	Abcg2	3.2284	0.00691368	4.57112	0.0153315	2.9121	0.00330289	4.25481	0.0150173
Q7TMW6;Q7TMW6-2	Ciao3	0.253891	0.81735	-1.50316	0.0723962	-0.483347	0.771583	-2.24039	0.165158
Q7TMY8;Q7TMY8-3;Q7TMY8-4	Huwe1	1.20901	0.212782	0.331948	0.254455	1.28353	0.183226	0.406464	0.0897336
Q7TN29;Q7TN29-2	Smap2	1.54899	0.016181	1.81061	0.00756249	1.20788	0.00155145	1.4695	5.13986e-05
Q7TN98	Cpeb4	2.84124	0.0166509	2.1576	0.0675962	3.39336	0.00115338	2.70971	0.0130664
Q7TNC9;Q7TNC9-2	Inpp5a	-0.144023	0.683233	-0.156706	0.666996	0.0889559	0.756479	0.0762726	0.798813
Q7TNG5;Q7TNG5-2	Eml2	0.365684	0.309083	0.0895618	0.746101	0.344737	0.293428	0.068615	0.772795
Q7TNM2	Trim46	-0.131411	0.807477	-0.305902	0.572676	0.121163	0.794146	-0.0533285	0.906663
Q7TNP2	Ppp2r1b	-1.42677	0.36586	-0.453767	0.749308	-1.18741	0.158493	-0.214404	0.69914
Q7TNR6	Igsf21	0.589955	0.161301	1.89793	0.0489407	0.420179	0.124701	1.72815	0.0503134
Q7TNR9	Arhgef4	1.17702	0.213994	0.668489	0.409397	0.98595	0.056686	0.477419	0.0494756
Q7TNV0	Dek	-0.499681	0.297651	0.757466	0.362682	-0.761178	0.0659954	0.495969	0.506001
Q7TNV1;Q7TNV1-2;Q7TNV1-3	Tlcd3b	0.422229	0.629798	1.09883	0.29417	0.254831	0.712675	0.931435	0.291466
Q7TPB0	Plppr3	2.90717	0.0155614	3.07563	0.00417422	2.6191	0.0169194	2.78756	0.00330216
Q7TPD3	Robo2	3.05653	0.000891888	3.71549	0.000151967	2.81345	0.000701234	3.47241	6.68793e-05
Q7TPH6;Q7TPH6-2	Mycbp2	-1.31998	0.170743	-1.07022	0.0013024	-3.1073	0.23603	-2.85754	0.243272
Q7TPM1	Prrc2b	-1.08663	0.00525233	-1.0023	0.00564302	-0.868831	0.00648829	-0.784498	0.0068513
Q7TPM6;Q7TPM6-2	Fsd1	0.266784	0.759547	0.275576	0.732781	0.534868	0.393425	0.54366	0.308102
Q7TPR4	Actn1	-0.180242	0.161352	0.105994	0.667036	-0.0656331	0.522649	0.220603	0.379854
Q7TPS5	C2cd5	1.65519	0.0393771	1.42179	0.0213291	1.14506	0.0646252	0.911656	0.0167142
Q7TPV4	Mybbp1a	0.550157	0.50303	0.0904535	0.91017	0.964948	0.0416341	0.505245	0.207698
Q7TQ95	Lnpk	1.76826	0.244764	1.22485	0.00930383	1.39026	0.340958	0.84685	0.0136548
Q7TQA1;Q7TQA1-5	Igsf1	0.0295919	0.967052	1.30044	0.124646	0.454135	0.234793	1.72499	0.005733
Q7TQA3	Sdr16c5	-1.53382	0.405462	0.75639	0.229411	-1.7002	0.359616	0.590008	0.314553
Q7TQD2	Tppp	2.46163	0.00650683	2.44282	0.00515118	2.28097	0.00180672	2.26215	0.000904256
Q7TQF7	Amph	2.64869	0.00687953	2.81046	0.00404896	2.53768	0.00103518	2.69944	0.000224146
Q7TQG1	Plekha6	0.595341	0.023292	1.1093	0.0416807	-0.704886	0.119511	-0.190932	0.716812
Q7TQH0-2	Atxn2l	-0.584805	0.0887363	-0.295386	0.154173	-0.734824	0.0415478	-0.445405	0.0391074
Q7TQI3	Otub1	0.290939	0.267845	0.46113	0.0802653	0.17783	0.372952	0.348021	0.0671974
Q7TSC1	Prrc2a	0.978631	0.393817	0.318336	0.740928	0.366328	0.734034	-0.293966	0.753956
Q7TSE6;Q7TSE6-2	Stk38l	0.0863514	0.923253	0.688905	0.541617	-0.166239	0.471142	0.436315	0.52986
Q7TSF1	Dsg1b	-3.60864	0.247855	-1.81859	0.0153312	-2.90641	0.349103	-1.11636	0.222308
Q7TSF4	Lrrc75a	0.310905	0.64788	-0.419134	0.480136	-0.775155	0.440217	-1.50519	0.149135
Q7TSH2	Phkb	1.85879	0.136504	2.5803	0.213114	1.45272	0.185806	2.17423	0.268755
Q7TSH8	Tmem94	3.86901	0.00537628	3.70852	0.00739772	3.25059	0.00367662	3.0901	0.00589362
Q7TSJ2	Map6	2.08005	0.00339552	1.99407	0.0038039	1.96912	4.97123e-05	1.88315	3.60591e-05
Q7TSN6	Gpr151	1.91777	0.015062	2.1447	0.00503104	0.824141	0.185255	1.05107	0.0747717
Q7TSQ8	Pdpr	-0.243275	0.454955	-0.327019	0.27955	-0.0595166	0.785139	-0.143261	0.403167
Q7TSV4	Pgm2	-3.13042	0.093678	-0.898838	0.305251	-2.55231	0.10778	-0.320722	0.290271
Q7TT15;Q7TT15-2	Galnt17	0.851156	0.224229	1.8467	0.0136254	0.634929	0.360846	1.63048	0.0256182
Q7TT37	Elp1	0.0621338	0.758476	0.0757001	0.618371	-0.0318727	0.881533	-0.0183064	0.912344
Q7TT50	Cdc42bpb	0.770163	0.0144086	0.834247	0.0151889	0.599385	0.0171092	0.663469	0.0191931
Q80SW1	Ahcyl1	0.764267	0.0187152	0.77438	0.0161135	0.522284	0.0220111	0.532398	0.0167539
Q80SY4	Mib1	0.908476	0.189107	2.57077	0.00498275	0.872621	0.174599	2.53491	0.00318947
Q80T41	Gabbr2	2.49153	0.0145884	3.04445	0.00424701	2.27171	0.00880872	2.82463	0.00146325
Q80TA6	Mtmr12	3.31066	0.0163482	4.04396	0.00752312	2.97418	0.0121825	3.70749	0.00488755
Q80TA9	Epg5	0.823569	0.387354	0.898296	0.178571	0.361167	0.615804	0.435895	0.0475003
Q80TB8	Vat1l	0.392387	0.140401	0.250013	0.127	0.371114	0.207176	0.22874	0.271037
Q80TE7	Lrrc7	1.14725	0.0190186	1.23347	0.0275211	0.899443	0.00190082	0.985669	0.0144121
Q80TF3	Pcdh19	3.55182	0.0133795	3.27583	0.0036153	2.94193	0.0121599	2.66594	0.000172764
Q80TF6	Stard9	1.75247	0.140576	2.11658	0.0818453	1.5672	0.176244	1.93131	0.102459
Q80TG9	Lrfn2	3.15493	0.0774875	4.23572	0.0116143	2.85139	0.0628879	3.93218	0.00315059
Q80TI0;Q80TI0-2;Q80TI0-3;Q80TI0-4;Q8VEF1;Q8VEF1-2;Q8VEF1-3	Gramd1a;Gramd1b	1.72112	0.0167632	1.9612	0.0140168	0.564637	0.54526	0.804714	0.409118
Q80TJ1-2	Cadps	2.25565	0.0336695	1.96802	0.0154803	1.95172	0.0457163	1.66408	0.0197798
Q80TJ1-4	Cadps	1.24214	0.0191458	1.31966	0.0136153	1.0602	0.00192415	1.13772	0.000548856
Q80TK0	Kiaa1107	1.03423	0.0820225	1.63791	0.0361864	1.13575	0.00953087	1.73943	0.00940025
Q80TL0	Ppm1e	0.484547	0.111273	0.443685	0.070609	0.263799	0.340077	0.222937	0.303538
Q80TL1	Adcy2	2.60093	0.0170372	2.42269	0.00883083	2.22788	0.0151559	2.04964	0.00406626
Q80TL4;Q80TL4-2	Phf24	1.31432	0.0139054	1.40178	0.015272	1.03423	0.00659006	1.12169	0.0101443
Q80TL7;Q80TL7-2	Mon2	1.55453	0.00732097	1.36422	0.00632591	1.10037	0.0151615	0.910056	0.0128384
Q80TM9	Nisch	-0.288497	0.660785	0.193607	0.722986	-0.478612	0.47136	0.00349204	0.994763
Q80TN5;Q80TN5-2	Zdhhc17	1.3947	0.372439	2.61919	0.0934953	2.06554	0.16325	3.29004	0.028465
Q80TN7	Nav3	0.833636	0.666383	1.84096	0.236308	1.46026	0.375651	2.46759	0.0401682
Q80TQ2;Q80TQ2-2	Cyld	0.97815	0.0177842	1.19242	0.0179866	0.76204	0.00952226	0.976313	0.0154782
Q80TR1	Adgrl1	0.953934	0.0285488	1.21566	0.0298766	0.630633	0.0493965	0.892355	0.0516123
Q80TS3;Q80TS3-3;Q80TS3-5	Adgrl3	-0.199932	0.587576	-0.0975014	0.765948	0.0339629	0.915562	0.136394	0.630753
Q80TT2	Baiap3	2.44453	0.00322721	1.57005	0.000430289	1.95329	0.00682208	1.07882	0.00105413
Q80TV8;Q80TV8-2	Clasp1	0.695185	0.0108264	0.811035	0.000211352	0.648092	0.0238346	0.763941	0.00275887
Q80TY0;Q80TY0-2;Q80TY0-3;Q80TY0-4	Fnbp1	1.34676	0.287844	1.27805	0.224795	1.6198	0.0750484	1.55109	0.00176075
Q80TY5	Vps13b	-0.166773	0.780334	0.355357	0.501845	-1.07763	0.0650017	-0.555504	0.156695
Q80TZ3	Dnajc6	1.81289	0.00679635	1.88881	0.00384557	1.64406	0.00168884	1.71997	0.000320328
Q80U19	Daam2	0.0744009	0.803105	0.846045	0.2135	-0.433623	0.316021	0.33802	0.618405
Q80U23;Q80U23-2;Q80U23-3	Snph	0.422758	0.202014	0.050663	0.778319	0.671069	0.0717916	0.298974	0.145964
Q80U28;Q80U28-15;Q80U28-3	Madd	2.0361	0.0156151	2.3289	0.012779	1.80364	0.00137776	2.09644	0.00234332
Q80U30;Q80U30-2;Q80U30-3;Q80U30-4;Q80U30-5	Clec16a	0.661525	0.473343	2.219	0.0645559	-0.781723	0.319389	0.775749	0.351418
Q80U35	Arhgef17	-0.258684	0.901946	0.315178	0.881689	-0.264095	0.903797	0.309767	0.888137
Q80U40;Q80U40-2	Rimbp2	1.97833	0.0532613	2.02971	0.0827201	2.11738	0.0336666	2.16877	0.0594456
Q80U49	Cep170b	1.22753	0.24229	0.663929	0.579517	0.963343	0.366282	0.399739	0.744459
Q80U56	Avl9	1.83836	0.0374085	1.80714	0.00138622	1.63504	0.0464881	1.60381	0.000434955
Q80U63	Mfn2	1.12734	0.0128531	0.830833	0.0283439	0.798471	0.0104778	0.501965	0.0290625
Q80U78;Q80U78-2;Q80U78-3	Pum1	0.366665	0.770502	1.35239	0.341146	0.935297	0.114933	1.92102	0.0394957
Q80U87	Usp8	-0.43479	0.47397	-0.752833	0.262889	-0.809558	0.160377	-1.1276	0.0882102
Q80U95	Ube3c	0.251584	0.347025	2.4906	0.0488146	-0.0172415	0.93488	2.22178	0.0650628
Q80UG2	Plxna4	2.09129	0.0119879	2.24315	0.00851049	1.82368	0.000918312	1.97554	0.000338644
Q80UG5;Q80UG5-3	Septin9	0.994725	0.025983	0.973707	0.0341762	1.03001	0.00111331	1.009	0.00358611
Q80UJ7	Rab3gap1	1.10022	0.0614283	0.130431	0.655189	0.814835	0.144075	-0.154959	0.638595
Q80UM3	Naa15	0.137099	0.316976	0.0571683	0.805177	0.0651553	0.754495	-0.0147756	0.958293
Q80UM7	Mogs	0.721148	0.417788	0.187747	0.485416	0.720917	0.39792	0.187517	0.022819
Q80UP3	Dgkz	1.4306	0.0251198	1.20475	0.017898	1.19488	0.014193	0.969042	0.00079649
Q80UP8	Slc20a2	1.49587	0.20033	1.74423	0.173936	2.10225	0.000559663	2.35061	0.00658942
Q80UU9	Pgrmc2	2.21961	0.00977023	2.79022	0.0124578	1.91693	0.00751732	2.48755	0.0126888
Q80UW2	Fbxo2	0.0665108	0.744382	-0.184735	0.473439	0.256929	0.331785	0.00568358	0.984181
Q80V42	Cpm	1.78749	0.139664	0.655814	0.266787	2.24726	0.0646307	1.11559	0.0255373
Q80V91	Dtx3	1.58393	0.0259388	1.01038	0.0682025	1.84287	0.0072069	1.26932	0.013033
[truncated: 1,769 more rows]
