# Supplementary material
Source: Research Square preprint supplement (doi:10.21203/rs.3.rs-8597698/v1)
Supplement: Supplementary file 10 [file f177c5fc8e1e42b5dcd4caad.xlsx]

## Sheet: Sheet1
Identified proteins with corresponding IDs and annotations
uniprotID	geneSymbol	subset::FR-S	subset::FR-L	subset::steady	Previously reported presynaptic protein (SynaptomeDB)	Associated with neurological or psychiatric disorders	Functionally uncharacterized protein
A2A432;A2A432-2	Cul4b			YES		YES
A2A690;A2A690-2	Tanc2			YES	YES	YES
A2A699	Fam171a2	YES	YES		YES	YES	YES
A2AAE1;A2AAE1-2;A2AAE1-3;A2AAE1-4;A2AAE1-6	Kiaa1109	YES	YES		YES		YES
A2AHC3	Camsap1	YES	YES	YES	YES		YES
A2AHL1	Ano3	YES	YES	YES
A2AN08;A2AN08-3;A2AN08-5	Ubr4			YES	YES	YES
A2AP18-2	Plch2			YES		YES
A2APX8;A2APX8-2;A2APX8-3	Scn1a	YES	YES	YES	YES	YES
A2AQ25	Skt		YES
A2ARS0	Ankrd63			YES	YES	YES	YES
A2AWA9	Rabgap1			YES			YES
A2CG49;A2CG49-2	Kalrn			YES	YES	YES
A6H5Z3	Exoc6b	YES			YES	YES	YES
B0V2N1;B0V2N1-3;B0V2N1-4;B0V2N1-6	Ptprs			YES	YES
B1AWN6	Scn2a	YES	YES	YES	YES	YES
B1AZP2-2	Dlgap4	YES	YES	YES	YES
B2RSH2	Gnai1			YES	YES	YES
B9EJ86	Osbpl8			YES	YES
D3YVE8	Slc35g2		YES	YES	YES	YES	YES
D3YWQ0;D3YWQ0-2	Dgki			YES	YES	YES
D3YXJ0;D3YXJ0-2	Dgkh			YES		YES
E9PUL5	Prrt2	YES	YES	YES	YES	YES
E9PV86	Mctp1	YES	YES				YES
E9PZ19	Igsf9b	YES	YES			YES
E9Q3L2	Pi4ka			YES	YES	YES
E9Q912;E9Q912-2	Rap1gds1			YES	YES
G3XA57;G3XA57-2	Rab11fip2	YES			YES	YES
G5E829	Atp2b1	YES	YES	YES	YES
G5E8K5;G5E8K5-2;G5E8K5-3	Ank3			YES	YES	YES
O08530	S1pr1	YES	YES		YES
O08539	Bin1	YES	YES	YES	YES	YES
O08576;O08576-2;O08576-3;O08576-4	Rundc3a			YES	YES		YES
O08599	Stxbp1			YES	YES	YES
O08644	Ephb6			YES
O08747;O08747-2	Unc5c			YES		YES
O08917	Flot1	YES		YES	YES
O08919	Numbl	YES	YES	YES	YES
O08992	Sdcbp	YES	YES	YES
O09117;O09117-2	Sypl1			YES	YES
O09126	Sema4d	YES	YES
O35136	Ncam2	YES	YES	YES	YES
O35250;O35250-2	Exoc7			YES	YES
O35316	Slc6a6	YES	YES	YES	YES
O35375;O35375-2;O35375-3;O35375-4;O35375-5;O35375-6	Nrp2	YES		YES		YES
O35393	Efnb3	YES		YES
O35449	Prrt1	YES	YES	YES	YES
O35454	Clcn6	YES	YES	YES	YES	YES	YES
O35495;O35495-2	Cdk14	YES		YES
O35526	Stx1a	YES		YES	YES	YES
O35607	Bmpr2	YES		YES
O35609	Scamp3	YES	YES	YES	YES
O35633;O35633-2	Slc32a1			YES	YES	YES
O35678	Mgll			YES	YES
O35681	Syt3			YES	YES
O35682	Myadm	YES	YES	YES	YES		YES
O35685	Nudc			YES	YES
O35874	Slc1a4	YES	YES	YES	YES	YES
O35927	Ctnnd2	YES	YES	YES	YES	YES
O35963	Rab33b			YES	YES
O54774	Ap3d1			YES	YES
O54829	Rgs7	YES		YES	YES
O54901	Cd200	YES	YES	YES	YES
O54916	Reps1			YES
O54988-2	Slk			YES	YES
O54991	Cntnap1			YES	YES	YES
O55017;O55017-2	Cacna1b			YES	YES
O55033	Nck2	YES	YES	YES		YES
O55042;O55042-2	Snca	YES	YES		YES	YES
O55074;Q7TN79	Akap7			YES	YES
O55100;O55100-2	Syngr1	YES		YES	YES	YES
O55106	Strn			YES	YES	YES	YES
O55131	Septin7	YES	YES	YES	YES	YES
O55143	Atp2a2			YES	YES	YES
O55192	Slc6a2			YES		YES
O70161;O70161-3	Pip5k1c	YES	YES	YES	YES
O70166	Stmn3	YES	YES	YES	YES
O70172	Pip4k2a			YES	YES	YES
O70174	Chrna4		YES
O70228	Atp9a			YES	YES	YES
O70252	Hmox2			YES	YES		YES
O70274;Q63739	Ptp4a1;Ptp4a2		YES		YES		YES
O70400	Pdlim1			YES
O70401	Tspan6	YES				YES	YES
O70439	Stx7	YES	YES	YES	YES
O70443	Gnaz			YES	YES
O70566	Diaph2			YES		YES
O70585;O70585-2	Dtnb		YES		YES
O70589;O70589-3;O70589-4;O70589-5	Cask			YES	YES	YES
O88343	Slc4a4			YES	YES	YES
O88444	Adcy1		YES	YES
O88602	Cacng2	YES	YES	YES	YES	YES
O88643	Pak1			YES	YES	YES
O88689-3	Pcdha4	YES
O88703	Hcn2	YES	YES	YES	YES
O88704	Hcn1			YES	YES	YES
O88705	Hcn3	YES	YES
O88737	Bsn			YES	YES	YES
O88741	Gdap1			YES	YES
O88845	Akap10			YES
O88910	Mpp3	YES		YES	YES
O88935	Syn1			YES	YES	YES
O88983	Stx8			YES	YES
O89026	Robo1	YES	YES	YES		YES
O89032;O89032-2	Sh3pxd2a	YES	YES			YES
P00158	Mt-Cyb			YES
P00397	Mtco1			YES		YES
P03911	Mtnd4			YES
P03930	Mtatp8			YES	YES
P04627	Araf	YES		YES
P05132;P05132-2	Prkaca			YES	YES	YES
P05480;P05480-1	Src			YES	YES	YES
P05532;P05532-2	Kit	YES			YES	YES
P06745	Gpi			YES	YES	YES
P06837	Gap43			YES	YES	YES
P06880	Gh1	YES
P07758;Q00896	Serpina1a;Serpina1c	YES	YES			YES
P08414	Camk4			YES	YES	YES
P08752	Gnai2			YES	YES	YES
P09055	Itgb1			YES		YES
P0C7M9	Clec2l		YES		YES		YES
P10637	Mapt	YES		YES	YES	YES
P10639	Txn	YES	YES		YES	YES
P10852;P10852-2	Slc3a2			YES	YES	YES
P11404	Fabp3			YES	YES	YES
P12367	Prkar2a	YES		YES	YES
P12657	Chrm1	YES	YES	YES	YES	YES
P13595	Ncam1	YES		YES	YES	YES
P14094	Atp1b1			YES	YES	YES
P14231	Atp1b2			YES	YES
P14576	Srp54			YES			YES
P15116	Cdh2			YES	YES	YES
P15209	Ntrk2			YES	YES	YES
P15388;P15388-3	Kcnc1	YES	YES	YES	YES	YES
P16054	Prkce			YES	YES
P16283	Slc4a3	YES	YES
P16388	Kcna1	YES	YES	YES
P16390	Kcna3	YES	YES		YES	YES
P17156	Hspa2			YES	YES
P17426;P17426-2	Ap2a1			YES	YES	YES
P17427	Ap2a2			YES	YES	YES
P17809	Slc2a1			YES	YES	YES
P18052;P18052-2	Ptpra			YES	YES	YES
P18572;P18572-2	Bsg			YES	YES
P18581;P18581-2	Slc7a2	YES				YES
P18872	Gnao1			YES	YES
P18872-2	Gnao1			YES	YES
P19783	Cox4i1			YES	YES
P20352	F3	YES	YES	YES			YES
P21995	Emb	YES		YES	YES	YES	YES
P22723	Gabrg2			YES	YES	YES
P22933	Gabrd	YES	YES	YES		YES
P23242	Gja1	YES	YES	YES	YES	YES
P23818	Gria1			YES	YES	YES
P23819;P23819-4	Gria2			YES	YES	YES
P26048	Gabra2	YES			YES	YES
P26049	Gabra3	YES	YES	YES	YES	YES
P27601	Gna13			YES	YES
P28028;P28028-1	Braf			YES
P28571-1	Slc6a9	YES	YES	YES	YES	YES
P28660	Nckap1			YES	YES
P28661;P28661-2;P28661-3	Septin4			YES	YES	YES
P28663	Napb			YES	YES
P30999	Ctnnd1	YES	YES	YES	YES	YES
P30999-2;P30999-3	Ctnnd1		YES	YES	YES	YES
P31324	Prkar2b	YES	YES		YES
P31648	Slc6a1	YES		YES	YES	YES
P31650	Slc6a11	YES		YES	YES	YES
P32037	Slc2a3	YES	YES	YES	YES
P32883-2	Kras			YES	YES
P34152;P34152-2;P34152-4	Ptk2			YES		YES
P35235-1	Ptpn11			YES	YES
P35279;P35279-2	Rab6a			YES	YES
P35282	Rab21			YES	YES
P35285	Rab22a			YES	YES
P35288	Rab23			YES	YES
P35436	Grin2a	YES		YES		YES
P35438	Grin1			YES	YES	YES
P35802	Gpm6a	YES	YES	YES	YES	YES
P35803	Gpm6b	YES	YES	YES	YES
P39087;P39087-2	Grik2		YES		YES	YES
P40237	Cd82			YES		YES	YES
P40240	Cd9	YES			YES
P42225	Stat1	YES
P42859	Htt			YES	YES
P43006;P43006-2	Slc1a2	YES	YES	YES	YES	YES
P46096	Syt1	YES	YES	YES	YES	YES
P46097	Syt2			YES	YES
P47708	Rph3a			YES	YES	YES
P47740	Aldh3a2			YES	YES
P47743	Grm8	YES	YES	YES	YES	YES
P47746	Cnr1	YES	YES		YES	YES
P47809	Map2k4			YES
P48168	Glrb			YES
P49446;P49446-2;P49446-3	Ptpre			YES	YES
P49769	Psen1	YES	YES	YES		YES
P50516	Atp6v1a			YES	YES	YES
P50518	Atp6v1e1			YES	YES
P50571	Gabrb1	YES	YES	YES		YES
P51141	Dvl1			YES
P51150	Rab7a			YES	YES	YES
P51830	Adcy9	YES	YES	YES	YES	YES
P52189	Kcnj4	YES	YES	YES
P52795	Efnb1	YES	YES	YES	YES	YES
P52800	Efnb2	YES	YES	YES		YES
P53612	Rabggtb			YES	YES
P53668	Limk1			YES
P53810	Pitpna			YES	YES	YES
P53811	Pitpnb			YES
P53986	Slc16a1	YES	YES	YES	YES
P53994	Rab2a			YES	YES	YES
P54285	Cacnb3			YES	YES	YES
P54754	Ephb3			YES	YES
P54763;P54763-2;P54763-4	Ephb2			YES	YES
P54822	Adsl			YES	YES	YES
P55012	Slc12a2	YES	YES	YES	YES	YES
P55088;P55088-2;P55088-3	Aqp4			YES	YES	YES
P55258	Rab8a			YES	YES
P55288	Cdh11	YES	YES			YES
P55821	Stmn2	YES	YES	YES	YES	YES
P56135	Atp5mf			YES	YES
P56564	Slc1a3			YES	YES	YES
P56695	Wfs1			YES	YES	YES
P56818	Bace1			YES	YES
P58406	Hrh3	YES	YES				YES
P58802	Tbc1d10a	YES	YES				YES
P58871	Tnks1bp1			YES			YES
P59281;P59281-2	Arhgap39	YES	YES	YES			YES
P59325	Eif5			YES	YES
P59648	Fxyd7			YES	YES		YES
P59764;P59764-2	Dock4			YES	YES	YES
P60202	Plp1			YES	YES	YES
P60335	Pcbp1			YES
P60469	Ppfia3	YES	YES		YES
P60766-1	Cdc42			YES	YES	YES
P60879	Snap25	YES	YES	YES	YES	YES
P60879-2	Snap25	YES	YES	YES	YES	YES
P60904	Dnajc5	YES	YES	YES	YES
P61027	Rab10			YES	YES
P61082	Ube2m			YES
P61226	Rap2b			YES	YES	YES
P61264	Stx1b	YES	YES	YES	YES	YES
P61750	Arf4			YES	YES
P61924	Copz1			YES			YES
P62484	Abi2			YES	YES
P62743	Ap2s1			YES	YES
P62761	Vsnl1			YES	YES	YES
P62812	Gabra1			YES	YES	YES
P62821	Rab1A			YES	YES
P62823	Rab3c			YES	YES
P62827	Ran			YES	YES	YES
P62869	Elob			YES	YES
P62983	Rps27a			YES	YES	YES
P63001	Rac1			YES	YES	YES
P63011	Rab3a			YES	YES	YES
P63017	Hspa8			YES	YES	YES
P63037	Dnaja1			YES	YES
P63040	Cplx1	YES	YES	YES	YES
P63044	Vamp2			YES	YES	YES
P63080	Gabrb3	YES		YES	YES	YES
P63082	Atp6v0c			YES	YES	YES
P63137-2	Gabrb2	YES	YES	YES	YES	YES
P63141	Kcna2	YES	YES	YES	YES
P63250	Kcnj3			YES		YES
P63328	Ppp3ca			YES	YES	YES
P70206	Plxna1			YES	YES
P70211;P70211-2;P70211-3	Dcc	YES	YES			YES
P70232;P70232-2	Chl1			YES	YES	YES
P70280	Vamp7	YES			YES	YES
P70290	Mpp1	YES	YES	YES
P70296	Pebp1			YES	YES	YES
P70302	Stim1	YES	YES		YES
P70345;P70345-2	Bcl2l2	YES	YES
P70414	Slc8a1	YES	YES	YES	YES	YES
P70423	Slc7a3	YES	YES
P70677	Casp3		YES			YES
P70689	Gjb6		YES
P70704-2	Atp8a1	YES	YES		YES
P83510	Tnik	YES		YES	YES	YES
P83741;P83741-2;P83741-3;P83741-4;P83741-5	Wnk1			YES
P84075	Hpca			YES	YES	YES
P84084	Arf5			YES	YES	YES
P84086	Cplx2	YES	YES	YES	YES	YES
P84091	Ap2m1			YES	YES	YES
P84309;P84309-2	Adcy5			YES	YES
P97300	Nptn			YES	YES	YES
P97318;P97318-2;P97318-8	Dab1		YES	YES		YES
P97370	Atp1b3	YES			YES
P97441	Slc30a3	YES	YES	YES	YES	YES
P97445	Cacna1a	YES	YES	YES	YES	YES
P97447	Fhl1			YES	YES	YES
P97490	Adcy8	YES	YES	YES		YES
P97492	Rgs14			YES
P97494	Gclc			YES
P97718	Adra1a	YES	YES	YES
P97742	Cpt1a			YES
P97772	Grm1	YES	YES	YES	YES	YES
P97792	Cxadr		YES	YES	YES
P97797-2	Sirpa	YES	YES	YES	YES	YES
P97798;P97798-2;P97798-3;P97798-5	Neo1	YES	YES	YES	YES
P97950	Rab33a			YES	YES		YES
P97952	Scn1b			YES
P98195;P98195-2	Atp9b	YES			YES		YES
P98200	Atp8a2			YES	YES	YES
P98203;P98203-2;P98203-4;P98203-5	Arvcf			YES		YES
Q01065	Pde1b			YES
Q01097	Grin2b			YES	YES	YES
Q01815;Q01815-2	Cacna1c	YES	YES		YES	YES
Q02248	Ctnnb1			YES	YES	YES
Q03137	Epha4			YES	YES
Q03141;Q03141-3	Mark3	YES	YES	YES	YES
Q04690-2	Nf1			YES	YES	YES
Q05512	Mark2			YES	YES	YES
Q05A62;Q05A62-2;Q05A62-3	Dnal1			YES			YES
Q05BC3;Q05BC3-2;Q05BC3-3	Eml1			YES
Q06138	Cab39			YES
Q07813	Bax			YES	YES	YES
Q08460;Q08460-5	Kcnma1	YES	YES	YES	YES
Q0P5W1;Q0P5W1-3	Vps8			YES
Q0VBF8	Stum	YES	YES	YES	YES		YES
Q148V7;Q148V7-2	Relch			YES
Q149F3	Gspt2	YES					YES
Q14BI2	Grm2	YES	YES	YES	YES	YES
Q14CH0-2	Fam171b	YES	YES	YES
Q2M3X8;Q2M3X8-4	Phactr1	YES	YES		YES
Q2NL51	Gsk3a			YES	YES	YES
Q2PFD7;Q2PFD7-2;Q2PFD7-5	Psd3	YES	YES	YES	YES
Q2TV84;Q2TV84-3	Trpm1	YES
Q2WF71	Lrfn1			YES
Q32NY4;Q32NY4-2	Cnnm3	YES	YES				YES
Q3B7Z2	Osbp			YES	YES
Q3TIU4	Pde12			YES
Q3TWL2	Pip4p1			YES	YES
Q3TWN3	Cnnm2	YES	YES			YES
Q3TXX4	Slc17a7	YES	YES	YES	YES	YES
Q3TY60-2	Fam131b	YES	YES	YES	YES		YES
Q3TY86;Q3TY86-2;Q3TY86-3	Aifm3			YES	YES
Q3TZZ7	Esyt2			YES	YES		YES
Q3U1F9	Pag1			YES	YES	YES
Q3U1Y4	Dennd4b			YES		YES	YES
Q3U7U3	Fbxo7			YES
Q3UDP0	Wdr41			YES
Q3UFT3	Garem1	YES	YES	YES			YES
Q3UGY8	Arfgef3			YES	YES		YES
Q3UH66-3;Q3UH66-5;Q3UH66-7	Wnk2	YES		YES
Q3UH93	Plxnd1			YES
Q3UHC7;Q3UHC7-2;Q3UHC7-3;Q3UHC7-4	Dab2ip	YES	YES	YES	YES
Q3UHD1	Adgrb1	YES	YES	YES		YES
Q3UHD9	Agap2	YES	YES		YES
Q3UHE1;Q3UHE1-2	Pitpnm3		YES				YES
Q3UHH2	Slc22a23	YES	YES	YES			YES
Q3UHJ0;Q3UHJ0-2	Aak1			YES	YES
Q3UHK1	Slc2a13	YES	YES		YES
Q3UHL1	Camkv			YES	YES
Q3UJP5	Cfap418	YES	YES	YES
Q3UMB5	Smcr8			YES
Q3UN16	Gpr162	YES	YES	YES			YES
Q3URE9	Lingo2	YES	YES
Q3UUG6;Q3UUG6-2	Tbc1d24	YES	YES	YES	YES	YES
Q3UUJ4	Strada	YES	YES
Q3UVL4	Vps51			YES	YES
Q3UZP4	Svip	YES	YES	YES			YES
Q3V0I2	Prr7	YES	YES	YES
Q3V132	Slc25a31	YES
Q3V1U8	Elmod1	YES			YES
Q3V3Q7	Pacs2	YES	YES				YES
Q3V3V9-2	Carmil2	YES	YES	YES
Q4JIM5	Abl2	YES	YES
Q4KMM3	Oxr1			YES	YES	YES
Q4PNJ2	Nkain2		YES
Q4QQM4	Trp53i11			YES		YES	YES
Q4VAE3	Tmem65			YES	YES
Q505F5	Lrrc47			YES	YES		YES
Q52KF3;Q52KF3-2;Q52KF3-3	Spire1			YES	YES
Q52KR3;Q52KR3-2;Q52KR3-3;Q52KR3-4;Q52KR3-6	Prune2			YES
Q56A07	Scn2b	YES			YES
Q5DQR4;Q5DQR4-2	Stxbp5l			YES	YES
Q5DTL9;Q5DTL9-2;Q5DTL9-3;Q5DTL9-4	Slc4a10	YES	YES	YES	YES	YES
Q5DTN8	Jakmip3			YES			YES
Q5DTY9	Kctd16			YES
Q5DU31;Q5DU31-2	Ipcef1		YES	YES	YES		YES
Q5FW52;Q5FW52-2	Mlip			YES
Q5FWH7;Q5FWH7-2	Slc39a12	YES	YES	YES		YES
Q5FWK3	Arhgap1	YES		YES	YES
Q5GH64	Xkr7		YES	YES	YES
Q5GH67	Xkr4	YES	YES	YES	YES	YES
Q5HZI2	C2cd4c	YES	YES	YES	YES
Q5NCE8	Mrs2	YES
Q5PR73	Diras2	YES	YES	YES	YES	YES	YES
Q5RJI5	Brsk1			YES	YES
Q5SP85;Q5SP85-2	Ccdc85a	YES		YES	YES		YES
Q5SQX6	Cyfip2			YES	YES	YES
Q5SRX1;Q5SRX1-2;Q5SRX1-3;Q5SRX1-4	Tom1l2			YES	YES	YES	YES
Q5SSL4;Q5SSL4-2	Abr	YES
Q5SSM3;Q5SSM3-2;Q5SSM3-3	Arhgap44			YES	YES
Q5SUR0	Pfas			YES
Q5SV85-2	Synrg	YES	YES				YES
Q5SYL3	Kiaa0100			YES			YES
Q5Y5T1;Q5Y5T1-2	Zdhhc20	YES	YES				YES
Q60603	Kcnh1		YES	YES
Q60629	Epha5	YES			YES	YES
Q60634	Flot2	YES		YES	YES
Q60714	Slc27a1			YES	YES
Q60738	Slc30a1	YES	YES	YES
Q60771	Cldn11			YES	YES	YES
Q60780	Gas7		YES		YES
Q60902	Eps15l1			YES	YES
Q60996;Q60996-3	Ppp2r5c			YES		YES
Q61097-2	Ksr1	YES	YES	YES
Q61137;Q61137-2	Astn1	YES	YES	YES
Q61140;Q61140-2	Bcar1	YES
Q61151	Ppp2r5e			YES	YES		YES
Q61161	Map4k2			YES
Q61165	Slc9a1	YES		YES	YES
Q61234	Snta1			YES	YES
Q61249	Igbp1	YES	YES			YES
Q61271	Acvr1b	YES	YES
Q61285	Abcd2	YES	YES
Q61290	Cacna1e	YES		YES
Q61301;Q61301-2;Q61301-3	Ctnna2			YES	YES	YES
Q61327	Slc6a3		YES			YES
Q61411	Hras			YES	YES
Q61423	Kcna4	YES	YES	YES
Q61481	Pde1a			YES
Q61490	Alcam			YES	YES
Q61548;Q61548-2;Q61548-3	Snap91	YES		YES	YES	YES
Q61598;Q61598-2	Gdi2			YES	YES
Q61609	Slc20a1	YES		YES	YES
Q61672	Slc29a2	YES	YES	YES
Q61699;Q61699-2	Hsph1			YES	YES
Q61730-3	Il1rap	YES	YES		YES
Q61735	Cd47	YES	YES	YES	YES
Q61735-2	Cd47	YES		YES	YES
Q61743	Kcnj11	YES	YES
Q61792	Lasp1			YES	YES	YES
Q61838	Pzp			YES	YES
Q61885	Mog			YES	YES	YES
Q61923	Kcna6	YES	YES	YES	YES
Q62048	Pea15			YES	YES	YES
Q62108;Q62108-2;Q62108-3	Dlg4			YES	YES	YES
Q62172	Ralbp1	YES	YES	YES
Q62261	Sptbn1			YES	YES
Q62277	Syp	YES	YES	YES	YES	YES
Q62283	Tspan7		YES		YES	YES	YES
Q62348	Tsn			YES		YES
Q62393;Q62393-2;Q62393-3	Tpd52		YES		YES
Q62407;Q62407-3;Q62407-4	Speg	YES	YES			YES
Q62419	Sh3gl1		YES		YES	YES
Q62420	Sh3gl2	YES	YES	YES	YES	YES
Q62421	Sh3gl3	YES	YES		YES	YES
Q63959	Kcnc3			YES
Q640M6	Gdpd5	YES			YES
Q640R3	Hepacam			YES	YES	YES
Q641K1;Q641K1-2	Agtpbp1			YES
Q64332-2	Syn2			YES	YES	YES
Q64343	Abcg1	YES	YES
Q64455	Ptprj	YES	YES	YES
Q64519	Sdc3	YES	YES
Q64735;Q64735-2	Cr1l	YES	YES		YES
Q66L42	Map3k10	YES	YES			YES
Q66L44	Cbarp	YES		YES	YES
Q68EF4	Grm4	YES	YES	YES	YES
Q68FD9	Kiaa1549			YES
Q68FE2	Atg9a	YES	YES		YES
Q68FH0;Q68FH0-2	Pkp4			YES	YES	YES
Q69Z38	Peak1			YES
Q69Z98;Q69Z98-2;Q69Z98-3;Q69Z98-4	Brsk2	YES	YES	YES	YES
Q69ZH9	Arhgap23			YES	YES		YES
Q69ZK9	Nlgn2			YES	YES	YES
Q69ZS6	Sv2c			YES	YES
Q69ZW3;Q69ZW3-2	Ehbp1	YES	YES	YES
Q6AXF6	Sidt1	YES	YES	YES
Q6DFV3	Arhgap21	YES	YES	YES		YES
Q6DFV7	Ncoa7	YES	YES
Q6GV12	Kdsr	YES
Q6GYP7;Q6GYP7-2	Ralgapa1	YES			YES
Q6I6G8	Hecw2			YES			YES
Q6IMP4;Q6IMP4-2	Panx2	YES	YES
Q6NVE8	Wdr44	YES	YES	YES			YES
Q6NVF0	Ocrl			YES	YES	YES
Q6NXK7	Dpp10	YES		YES	YES	YES
Q6P2B1;Q6P2B1-2	Tnpo3			YES			YES
Q6P5F6	Slc39a10	YES	YES	YES
Q6P5F7	Ttyh3	YES		YES	YES
Q6P5F9	Xpo1			YES	YES
Q6P8I4	Pcnp	YES					YES
Q6PAK3	Prmt8	YES	YES	YES	YES
Q6PAM0	Prkab2			YES		YES
Q6PB44;Q6PB44-2	Ptpn23			YES	YES
Q6PB90;Q91XZ4	Pcdhb14;Pcdhb6	YES	YES				YES
Q6PD03	Ppp2r5a			YES
Q6PD21	Shb		YES	YES
Q6PD28	Ppp2r5b	YES		YES	YES		YES
Q6PDC8	Mfsd4a	YES	YES	YES	YES		YES
Q6PE13	Prrt3			YES	YES		YES
Q6PER3	Mapre3			YES	YES
Q6PGE7	Slc6a7	YES	YES	YES	YES
Q6PGF7	Exoc8			YES	YES		YES
Q6PHN9	Rab35			YES	YES
Q6PIC6	Atp1a3	YES	YES	YES	YES	YES
Q6PIE5	Atp1a2			YES	YES
Q6Q477;Q6Q477-2	Atp2b4	YES		YES	YES	YES
Q6RHR9;Q6RHR9-3	Magi1	YES		YES	YES	YES
Q6V4S5	Sdk2	YES	YES	YES		YES
Q6VNB8	Wdfy3			YES	YES
Q6VNS1	Ntrk3			YES	YES	YES
Q6X893;Q6X893-2	Slc44a1			YES	YES
Q6Y685	Tacc1	YES	YES
Q6ZPE2	Sbf1			YES	YES
Q6ZPF3;Q6ZPF3-2;Q6ZPF3-3	Tiam2	YES	YES	YES
Q6ZQ18;Q6ZQ18-2	Efr3b	YES		YES	YES		YES
Q6ZQ38	Cand1			YES	YES	YES
Q6ZQK5	Acap2	YES	YES	YES
Q71M36	Cspg5	YES	YES	YES	YES	YES
Q76HP3	Tmem132d			YES		YES	YES
Q78IK2	Atp5mk			YES	YES
Q78JW9	Ubfd1			YES			YES
Q78ZA7	Nap1l4			YES	YES
Q791T5;Q791T5-2	Mtch1	YES		YES	YES
Q791V5	Mtch2			YES	YES
Q7M6Y3-5	Picalm	YES			YES	YES
Q7TMS5	Abcg2	YES	YES	YES
Q7TMY8;Q7TMY8-2;Q7TMY8-3;Q7TMY8-4	Huwe1			YES		YES
Q7TN29;Q7TN29-2	Smap2			YES
Q7TN98	Cpeb4		YES
Q7TPB0	Plppr3	YES	YES	YES
Q7TPD3	Robo2	YES	YES	YES	YES	YES
Q7TQD2	Tppp	YES	YES	YES	YES
Q7TQF7	Amph	YES	YES	YES	YES	YES
Q7TSH8	Tmem94	YES	YES
Q7TT50	Cdc42bpb			YES	YES
Q80T41	Gabbr2	YES	YES	YES	YES	YES
Q80TA6	Mtmr12	YES	YES	YES	YES		YES
Q80TE7	Lrrc7			YES	YES	YES	YES
Q80TF3	Pcdh19	YES	YES			YES	YES
Q80TG9	Lrfn2			YES
Q80TJ1-2	Cadps			YES	YES
Q80TL1	Adcy2	YES	YES			YES
Q80TL4	Phf24			YES	YES
Q80TR1	Adgrl1			YES	YES
Q80TY0;Q80TY0-2;Q80TY0-3	Fnbp1			YES	YES
Q80TZ3	Dnajc6			YES	YES	YES
Q80U28;Q80U28-15;Q80U28-3	Madd	YES		YES	YES
Q80U40;Q80U40-2	Rimbp2			YES
Q80U56	Avl9			YES			YES
Q80U95	Ube3c			YES			YES
Q80UG2	Plxna4	YES			YES
Q80UG5;Q80UG5-3	Septin9			YES	YES
Q80UP8	Slc20a2		YES		YES
Q80UU9	Pgrmc2	YES			YES
Q80VP1;Q80VP1-2	Epn1	YES	YES	YES	YES
Q80VP9	Asphd2		YES		YES		YES
Q80VQ0	Aldh3b1	YES	YES			YES
Q80WC7;Q80WC7-2	Agfg2	YES	YES				YES
Q80WG5	Lrrc8a			YES			YES
Q80WQ2	Vac14			YES	YES
Q80X80	C2cd2l			YES	YES
Q80XA6	Reps2			YES			YES
Q80XI4	Pip4k2b			YES	YES
Q80XK6	Atg2b			YES
Q80XP9;Q80XP9-2	Wnk3	YES	YES	YES		YES
Q80XR2	Atp2c1	YES	YES	YES	YES
Q80XU8	Lrfn4			YES
Q80YA9	Cnksr2	YES		YES	YES	YES
Q80YA9-2	Cnksr2	YES	YES	YES	YES	YES
Q80ZF8	Adgrb3	YES	YES	YES
Q80ZJ1	Rap2a			YES	YES
Q810B7	Slitrk5	YES	YES	YES
Q810B8	Slitrk4			YES
Q811D0;Q811D0-2;Q811D0-3	Dlg1	YES	YES	YES	YES	YES
Q811P8	Arhgap32			YES	YES	YES
Q8BFT9	Svop	YES	YES	YES	YES		YES
Q8BG39	Sv2b	YES	YES	YES	YES
Q8BG67;Q8BG67-2	Efr3a	YES	YES			YES
Q8BGD9	Eif4b	YES	YES	YES			YES
Q8BGQ1;Q8BGQ1-2	Vipas39			YES	YES
Q8BGR6	Arl15	YES	YES				YES
Q8BGU5;Q8BGU5-2	Ccny	YES	YES	YES	YES
Q8BGY9	Slc5a7	YES	YES	YES	YES
Q8BGZ1	Hpcal4			YES	YES		YES
Q8BH57;Q8BH57-2	Wdr48			YES	YES
Q8BH82	Napepld	YES	YES		YES
Q8BHC1	Rab39b	YES		YES		YES
Q8BHE3	Atcay			YES	YES	YES
Q8BHE8	Maip1	YES	YES				YES
Q8BHH2	Rab9b			YES	YES
Q8BHK2	Scn3b			YES		YES
Q8BHL3	Tbc1d10b	YES	YES	YES			YES
Q8BHW2	Oscp1	YES	YES	YES
Q8BI08	Mal2	YES	YES	YES	YES		YES
Q8BIK4;Q8BIK4-2	Dock9			YES	YES	YES
Q8BIW1	Prune1	YES	YES				YES
Q8BJF9	Chmp2b			YES		YES	YES
Q8BJI1	Slc6a17	YES	YES	YES	YES	YES
Q8BK08	Tmem11			YES	YES
Q8BK64	Ahsa1			YES
Q8BKC5	Ipo5			YES		YES
Q8BKX1-2	Baiap2	YES	YES	YES	YES	YES
Q8BLE7	Slc17a6	YES		YES	YES	YES
Q8BLQ7	Slc7a4	YES			YES		YES
Q8BLQ9;Q8BLQ9-2;Q8BLQ9-3	Cadm2	YES	YES	YES	YES
Q8BLU0	Flrt2		YES			YES
Q8BLV3	Slc9a7	YES	YES		YES		YES
Q8BNY6	Ncs1	YES	YES	YES	YES	YES
Q8BP00;Q8BP00-2	Iqcb1			YES
Q8BPE4	Tmem177	YES	YES	YES		YES	YES
Q8BQP9	Rgs7bp			YES
Q8BQQ1;Q8BQQ1-2	Zdhhc14		YES	YES			YES
Q8BQZ4	Ralgapb	YES			YES
Q8BR86;Q8BR86-2;Q8BR86-4	Kirrel3	YES	YES	YES		YES
Q8BR92	Palm2	YES	YES	YES	YES
Q8BRK8	Prkaa2			YES		YES
Q8BRN9	Cc2d1b			YES
Q8BRT1	Clasp2			YES	YES	YES
Q8BRU6	Slc18a2	YES	YES		YES	YES
Q8BRV5	Kiaa1671		YES		YES		YES
Q8BSS9	Ppfia2			YES	YES	YES
Q8BTG7	Ndrg4			YES	YES
Q8BTX9	Hsdl1			YES	YES
Q8BTY2	Slc4a7		YES
Q8BU33	Ilvbl	YES	YES		YES		YES
Q8BVE3	Atp6v1h			YES	YES	YES
Q8BVG8	Nat14		YES				YES
Q8BW96;Q8BW96-2	Camk1d			YES
Q8BX94	Osbpl2			YES
Q8BXR1	Slc7a14	YES	YES	YES	YES	YES
Q8BXR9	Osbpl6	YES		YES			YES
Q8BY89;Q8BY89-2	Slc44a2	YES	YES	YES	YES
Q8BYK5;Q8BYK5-2;Q8BYK5-3;Q8BYK5-4	Phactr3	YES					YES
Q8BYR5-2	Cadps2	YES	YES	YES	YES	YES
Q8BYW1;Q8BYW1-2;Q8BYW1-3	Arhgap25			YES			YES
Q8BZ05	Arap2			YES			YES
Q8BZA9	Tigar	YES	YES	YES		YES
Q8BZM1	Glmn		YES
Q8BZZ3	Wwp1			YES	YES
Q8C015	Pak5	YES	YES	YES	YES
Q8C079;Q8C079-3;Q8C079-4	Strip1			YES
Q8C0L0	Tmx4			YES	YES
Q8C0Q9;Q8C0Q9-2;Q8C0Q9-3	Rapgef5			YES			YES
Q8C0T5;Q8C0T5-2	Sipa1l1			YES	YES	YES
Q8C0Y0	Ppp4r4			YES
Q8C145	Slc39a6			YES	YES
Q8C166	Cpne1			YES	YES
Q8C180	Frs2		YES	YES
Q8C1B7;Q8C1B7-2;Q8C1B7-3	Septin11	YES		YES	YES
Q8C1Y8	Ccz1			YES	YES		YES
Q8C3W1		YES	YES				YES
Q8C419	Gpr158	YES	YES	YES	YES
Q8C437;Q8C437-3	Pex5l	YES	YES
Q8C4G9	Adgra1	YES	YES	YES
Q8C4X2	Csnk1g3	YES		YES	YES	YES	YES
Q8C522	Endod1			YES	YES		YES
Q8C525	Mb21d2	YES	YES				YES
Q8C561;Q8C561-2	Lmbrd2	YES	YES		YES		YES
Q8C5P7	Tdrp	YES					YES
Q8C6B2;Q8C6B2-2	Rtkn			YES
Q8C729-2	Fam126b	YES	YES	YES	YES		YES
Q8C754	Vps52			YES	YES
Q8C7M3-2;Q8C7M3-3	Trim9			YES		YES
Q8C7R4	Uba6			YES
Q8C8N2	Scai	YES			YES
Q8C8R3-2	Ank2			YES	YES	YES
Q8C8R3-4	Ank2			YES	YES	YES
Q8C996	Tmem163	YES	YES		YES
Q8CA71	Shisa4	YES	YES	YES	YES		YES
Q8CAA7	Pgm2l1			YES			YES
Q8CBE3	Wdr37			YES	YES
Q8CBH5;Q8CBH5-2	Mfsd6	YES			YES
Q8CBX0	Tmem63c	YES	YES		YES	YES
Q8CC35;Q8CC35-3	Synpo			YES	YES	YES
Q8CCA0	Dcun1d4			YES			YES
Q8CCJ4	Amer2			YES	YES		YES
Q8CFE4	Scyl2			YES	YES
Q8CGE9	Rgs12			YES
Q8CGM1;Q8CGM1-2;Q8CGM1-3	Adgrb2	YES	YES
Q8CGQ8;Q8CGQ8-2	Slc24a4	YES	YES	YES	YES
Q8CHG7	Rapgef2			YES	YES
Q8CHH9;Q8CHH9-2	Septin8	YES	YES	YES	YES
Q8CHU3	Epn2	YES	YES	YES	YES
Q8CIP4-2	Mark4	YES	YES	YES	YES
Q8CJ19	Mical3	YES	YES	YES	YES		YES
Q8CJ61	Cmtm4	YES			YES		YES
Q8JZR6;Q8JZR6-2	Slc4a8	YES	YES	YES	YES
Q8JZW4	Cpne5			YES	YES
Q8JZZ7;Q8JZZ7-2	Adgrl2	YES	YES
Q8K012;Q8K012-2	Fnbp1l	YES	YES	YES	YES		YES
Q8K021	Scamp1	YES	YES		YES
Q8K093	Trhde	YES	YES			YES	YES
Q8K097;Q8K097-2	Faim2	YES	YES	YES	YES
Q8K0U4	Hspa12a			YES	YES	YES	YES
Q8K0V2	Dcun1d3	YES	YES	YES			YES
Q8K1S4;Q8K1S4-2	Unc5a	YES	YES	YES
Q8K212	Pacs1	YES	YES	YES	YES	YES
Q8K221	Arfip2	YES	YES	YES	YES
Q8K2C9	Hacd3			YES	YES
Q8K2K6;Q8K2K6-1;Q8K2K6-3	Agfg1	YES	YES	YES	YES
Q8K353	Cystm1	YES					YES
Q8K382	Dennd1a			YES
Q8K394	Plcl2	YES	YES	YES	YES	YES
Q8K3F6	Kcnq3	YES	YES			YES
Q8K448	Abca5	YES
Q8K4G5-2;Q8K4G5-4	Ablim1			YES	YES
Q8K4P8;Q8K4P8-2	Hecw1			YES			YES
Q8K4Q0	Rptor			YES	YES
Q8K596;Q8K596-2	Slc8a2	YES	YES	YES	YES	YES
Q8QZV4	Stk32c			YES			YES
Q8R092		YES	YES	YES
Q8R0F9	Sec14l4			YES			YES
Q8R0S4;Q8R0S4-1;Q8R0S4-2	Cacnb4			YES	YES
Q8R127	Sccpdh			YES	YES
Q8R191	Syngr3	YES		YES	YES
Q8R1B0	Stac2	YES		YES
Q8R1F6;Q8R1F6-2	Hid1			YES			YES
Q8R1Q8	Dync1li1			YES	YES		YES
Q8R1T1;Q8R1T1-2	Chmp7	YES	YES			YES	YES
Q8R2R9	Ap3m2			YES	YES
Q8R2Y0;Q8R2Y0-2	Abhd6	YES	YES		YES
Q8R366	Igsf8			YES	YES	YES
Q8R3S6	Exoc1			YES	YES
Q8R3T5	Stxbp6			YES			YES
Q8R3V5;Q8R3V5-1;Q8R3V5-3	Sh3glb2			YES	YES		YES
Q8R3Z5	Cacnb1			YES	YES
Q8R464	Cadm4			YES	YES
Q8R4C2	Rufy2	YES	YES	YES			YES
Q8R570	Snap47			YES	YES
Q8R5A3	Apbb1ip	YES	YES
Q8R5H6	Wasf1			YES	YES
Q8R5M8-4	Cadm1	YES	YES	YES	YES	YES
Q8VBT9	Aspscr1			YES
Q8VBW1;Q8VBW1-2;Q8VBW1-3	Slc6a8		YES
Q8VCD6	Reep2			YES	YES
Q8VCY8-2	Plppr2			YES			YES
Q8VD37-8	Sgip1	YES	YES	YES	YES
Q8VDN2	Atp1a1	YES	YES	YES	YES	YES
Q8VDP6	Cdipt			YES	YES		YES
Q8VDZ4	Zdhhc5	YES	YES	YES	YES
Q8VE52	Ogfrl1	YES	YES				YES
Q8VEK0	Tmem30a			YES	YES
Q8VEL9;Q8VEL9-2	Rem2			YES			YES
Q8VHH5	Agap3			YES	YES
Q8VHH7	Adcy3	YES	YES	YES		YES
Q8VHK5	Mlc1	YES	YES	YES		YES
Q8VHW2	Cacng8	YES	YES	YES	YES
Q91V14	Slc12a5	YES		YES	YES	YES
Q91V24	Abca7	YES		YES
Q91VE0	Slc27a4			YES	YES
Q91VK4	Itm2c			YES
Q91VZ6	Smap1	YES	YES	YES
Q91W34;Q91W34-2	Rusf1		YES		YES		YES
Q91W52;Q91W52-2	Tmem19	YES					YES
Q91WG5	Prkag2			YES		YES	YES
Q91WJ0	Frs3	YES	YES				YES
Q91WL6	Snx11			YES			YES
Q91WL8	Wwox	YES	YES	YES		YES
Q91WM6	Eva1a	YES					YES
Q91X56	S1pr5	YES
Q91X72	Hpx			YES
Q91X97	Ncald			YES	YES
Q91XD6	Vps36			YES		YES
Q91XL9;Q91XL9-2	Osbpl1a			YES	YES	YES
Q91XM9-7	Dlg2			YES	YES
Q91XV3	Basp1	YES		YES	YES	YES
Q91XY4	Pcdhga4			YES
Q91Z38	Ttc1			YES			YES
Q91Z61	Diras1			YES	YES		YES
Q91ZR1	Rab4b			YES	YES
Q91ZZ3	Sncb	YES	YES		YES	YES
Q920M7	Syt17	YES	YES		YES
Q921C1	Gjc3	YES	YES	YES
Q921M7	Cyrib			YES	YES	YES
Q922J6	Tspan2			YES	YES	YES
Q922P8	Tmem132a	YES	YES		YES
Q922Q9;Q922Q9-2	Chid1		YES				YES
Q922S4;Q922S4-2;Q922S4-3	Pde2a			YES	YES
Q923M0	Ppp1r16a		YES	YES			YES
Q923T9;Q923T9-2;Q923T9-3	Camk2g			YES	YES
Q923Z0	Gprc5b		YES		YES	YES
Q924L1	Letmd1			YES
Q924M7	Mpi			YES
Q924N4;Q924N4-2	Slc12a6	YES	YES	YES	YES
Q924S7	Spred2	YES	YES	YES	YES	YES
Q924S8	Spred1	YES	YES	YES	YES	YES
Q925N0	Sfxn5			YES	YES
Q99J08	Sec14l2			YES	YES		YES
Q99J31	Ophn1			YES	YES	YES
Q99J56	Derl1			YES
Q99J77	Nans			YES
Q99JG2	Gpr37l1	YES	YES	YES	YES
Q99JP0	Map4k3	YES	YES	YES	YES
Q99JP7	Ggt7	YES	YES	YES	YES		YES
Q99JY8	Plpp3	YES		YES	YES
Q99K01;Q99K01-2;Q99K01-3;Q99K01-4	Pdxdc1	YES	YES				YES
Q99KG3;Q99KG3-3	Rbm10		YES
Q99KN9	Clint1			YES	YES	YES	YES
Q99KY4;Q99KY4-2	Gak			YES	YES
Q99L45	Eif2s2			YES
Q99LG2	Tnpo2			YES	YES
Q99M51	Nck1	YES
Q99MX7	Tmem121b	YES	YES				YES
Q99N28	Cadm3	YES	YES	YES	YES	YES
Q99N50;Q99N50-11;Q99N50-2;Q99N50-3;Q99N50-4;Q99N50-5;Q99N50-6;Q99N50-7;Q99N50-8	Sytl2	YES	YES
Q99NE5;Q99NE5-3;Q99NE5-4;Q99NE5-5	Rims1	YES	YES	YES	YES	YES
Q99NF2;Q99NF2-2;Q99NF2-4	Nsmf	YES	YES	YES
Q99P47	Cntnap4	YES	YES	YES	YES
Q99P58	Rab27b			YES	YES
Q99PL6	Ubxn6	YES	YES	YES			YES
Q99PT1	Arhgdia			YES	YES	YES
Q9CPQ3	Tomm22			YES	YES
Q9CPS6	Hint3	YES	YES	YES	YES
Q9CPU4	Mgst3			YES	YES		YES
Q9CPW0	Cntnap2			YES		YES
Q9CQ10	Chmp3			YES			YES
Q9CQ80	Vps25			YES
Q9CQ91	Ndufa3	YES	YES	YES
Q9CQQ7	Atp5pb			YES	YES
Q9CQS4	Slc25a46	YES	YES		YES
Q9CQW0	Emc6	YES					YES
Q9CQW1	Ykt6	YES	YES	YES	YES		YES
Q9CQX5	Cldnd1	YES	YES	YES
Q9CR16	Ppid			YES	YES		YES
Q9CR26	Vta1			YES
Q9CR67	Tmem33			YES	YES		YES
Q9CR95	Necap1			YES	YES
Q9CRB6	Tppp3			YES		YES
Q9CRY7	Gdpd1			YES	YES
Q9CX00	Ist1			YES		YES
Q9CX34	Sugt1			YES	YES
Q9CXV1	Sdhd	YES			YES
Q9CXW3	Cacybp			YES
Q9CZB0	Sdhc	YES			YES	YES
Q9CZN4;Q9CZN4-3	Shisa9	YES		YES		YES
Q9CZX9	Emc4	YES	YES				YES
Q9D0A3	Arpin	YES	YES		YES
Q9D164;Q9D164-2	Fxyd6	YES			YES	YES
Q9D1E6	Tbcb			YES		YES
Q9D1E8	Agpat5			YES	YES
Q9D1G5	Lrrc57			YES	YES		YES
Q9D1K2	Atp6v1f			YES	YES
Q9D1Q4	Dpm3	YES	YES				YES
Q9D1T0	Lingo1	YES	YES	YES	YES	YES
Q9D289	Trappc6b			YES			YES
Q9D2N4-2	Dtna	YES	YES	YES	YES
Q9D394;Q9D394-3	Rufy3			YES	YES
Q9D3A9	Ttyh1	YES			YES
Q9D428	GOLGA7B			YES
Q9D4H1	Exoc2			YES	YES	YES
Q9D517	Agpat3			YES	YES
Q9D5R2	Wdr20			YES			YES
Q9D5V5	Cul5			YES	YES
Q9D6F4	Gabra4		YES	YES		YES
Q9D6G9;Q9D6G9-2	Cmtm5	YES		YES
Q9D6J5	Ndufb8			YES	YES
Q9D6Y7;Q9D6Y7-2	Msra	YES				YES
Q9D710	Tmx2			YES	YES	YES	YES
Q9D7X3	Dusp3			YES
Q9D882	Fam241b		YES	YES	YES
Q9D8B3	Chmp4b			YES	YES
Q9D8Y0	Efhd2	YES	YES	YES	YES	YES
Q9D8Y1	Tmem126a	YES	YES
Q9D920	Borcs5	YES					YES
Q9DAZ9	Zfyve19	YES	YES				YES
Q9DB05	Napa			YES	YES
Q9DB73;Q9DB73-2	Cyb5r1			YES	YES
Q9DBE8	Alg2			YES	YES		YES
Q9DBG3;Q9DBG3-2	Ap2b1			YES	YES	YES
Q9DBG6	Rpn2			YES	YES
Q9DBJ1	Pgam1			YES	YES	YES
Q9DBX2	Pdcl			YES
Q9DC07	Nebl			YES	YES	YES	YES
Q9DC53	Cpne8		YES		YES		YES
Q9DCP2	Slc38a3	YES		YES	YES
Q9DCT8	Crip2	YES	YES		YES
Q9EP69	Sacm1l			YES	YES	YES
Q9EPJ9;Q9EPJ9-2	Arfgap1	YES	YES	YES	YES
Q9EPK2;Q9EPK2-2;Q9EPK2-3	Rp2			YES
Q9EPL8	Ipo7			YES
Q9EPN1;Q9EPN1-4	Nbea			YES		YES
Q9EPR4	Slc23a2	YES			YES
Q9EPU5	Tnfrsf21	YES	YES	YES		YES
Q9EQC5	Scyl1	YES	YES
Q9EQP2	Ehd4			YES	YES
Q9ERB0	Snap29	YES	YES	YES	YES
Q9ERR1;Q9ERR1-2	Ndel1	YES	YES		YES	YES
Q9ERS5	Plekha2	YES	YES
Q9ES28;Q9ES28-2;Q9ES28-3;Q9ES28-4;Q9ES28-7	Arhgef7			YES	YES
Q9ES97;Q9ES97-2	Rtn3			YES	YES	YES
Q9ES97-3	Rtn3			YES	YES	YES
Q9ESJ4	Nckipsd			YES
Q9JI39	Abcb10	YES
Q9JIF7	Copb1			YES	YES
Q9JIL5	Tulp4			YES			YES
Q9JIM1;Q9JIM1-2	Slc29a1	YES	YES	YES
Q9JIS5	Sv2a	YES	YES	YES	YES	YES
Q9JIZ9	Plscr3	YES	YES	YES	YES
Q9JJ59	Abcb9	YES	YES	YES			YES
Q9JJE4	Paqr4	YES					YES
Q9JJK2	Lancl2			YES	YES	YES	YES
Q9JJV5	Cacng3	YES	YES
Q9JJX7	Tdp2		YES				YES
Q9JJY3	Smpd3	YES	YES		YES	YES
Q9JK45	Kcnq5	YES			YES	YES
Q9JK48;Q9JK48-2	Sh3glb1			YES	YES
Q9JKD3	Scamp5	YES	YES		YES	YES	YES
Q9JKF6	Nectin1	YES	YES	YES	YES	YES
Q9JKK1;Q9JKK1-2	Stx6		YES	YES	YES
Q9JKZ2	Slc5a3			YES
Q9JL04	Fmn2			YES		YES
Q9JL26	Fmnl1	YES	YES
Q9JL56	Gde1			YES	YES
Q9JLV5	Cul3			YES		YES
Q9JM52;Q9JM52-3	Mink1			YES	YES
Q9JM63	Kcnj10			YES	YES	YES
Q9JM96	Cdc42ep4	YES	YES	YES		YES
Q9JMA1	Usp14			YES
Q9JMA2	Qtrt1			YES
Q9JMD3	Stard10			YES
Q9JMH9;Q9JMH9-1;Q9JMH9-4;Q9JMH9-6	Myo18a			YES	YES
Q9JMK2	Csnk1e			YES	YES	YES
Q9QWI6	Srcin1	YES	YES	YES	YES
Q9QWY8-2	Asap1	YES	YES	YES	YES	YES
Q9QXB9	Drg2			YES		YES
Q9QXJ1;Q9QXJ1-2	Apbb1	YES	YES		YES	YES
Q9QXL2;Q9QXL2-2;Q9QXL2-3;Q9QXL2-4	Kif21a			YES	YES	YES	YES
Q9QXV8	Spry2	YES	YES	YES	YES	YES
Q9QXW9	Slc7a8	YES	YES	YES
Q9QXY6	Ehd3	YES	YES	YES	YES	YES
Q9QXY7	Xk	YES	YES		YES	YES
Q9QY76	Vapb			YES	YES	YES
Q9QYB5;Q9QYB5-2	Add3	YES	YES	YES	YES	YES
Q9QYB8	Add2			YES	YES
Q9QYC0	Add1			YES	YES
Q9QYI5;Q9QYI5-1	Dnajb2			YES		YES	YES
Q9QYJ3	Dnajb1			YES	YES	YES
Q9QYS2	Grm3	YES	YES	YES	YES	YES
Q9QYX7	Pclo			YES	YES	YES
Q9QZB0	Rgs17	YES	YES	YES	YES
Q9QZB9	Dctn5			YES		YES
Q9QZC2	Plxnc1			YES
Q9QZI8	Serinc1			YES	YES
Q9QZQ1	Afdn			YES	YES
Q9QZS3;Q9QZS3-2;Q9QZS3-3;Q9QZS3-4	Numb	YES	YES	YES	YES	YES
Q9QZS8;Q9QZS8-2	Sh2d3c	YES		YES
Q9R0K7	Atp2b2	YES	YES	YES	YES	YES
Q9R0N5	Syt5	YES	YES		YES	YES
Q9R0N7-4	Syt7	YES	YES	YES	YES
Q9R0N8	Syt6	YES	YES	YES	YES	YES
Q9R1L5	Mast1			YES
Q9R1Q7	Plp2	YES					YES
Q9R1Q8	Tagln3			YES	YES	YES
Q9R1T4;Q9R1T4-2;Q9R1T4-3	Septin6	YES	YES	YES	YES
Q9R1V6-11;Q9R1V6-14	Adam22	YES	YES	YES	YES
Q9WTK7;Q9WTK7-2	Stk11	YES	YES	YES
Q9WTQ5;Q9WTQ5-2	Akap12	YES	YES		YES
Q9WTR1	Trpv2	YES	YES
Q9WTU3;Q9WTU3-5	Scn8a	YES	YES	YES		YES
Q9WUK2;Q9WUK2-2	Eif4h			YES	YES
Q9WUL7	Arl3			YES	YES
Q9WV18	Gabbr1	YES		YES	YES	YES
Q9WV27	Atp1a4	YES	YES	YES	YES
Q9WV55	Vapa			YES	YES	YES
Q9WV60	Gsk3b			YES	YES	YES
Q9WV92	Epb41l3	YES	YES	YES	YES	YES
Q9WVF8	Tusc2			YES
Q9WVK4	Ehd1			YES	YES
Q9WVK8	Cyp46a1			YES	YES
Q9WVQ1	Magi2			YES		YES
Q9Z0E0;Q9Z0E0-2	Ncdn			YES	YES	YES
Q9Z0P4	Palm	YES		YES	YES
Q9Z0P4-2	Palm	YES	YES	YES	YES
Q9Z0P5;Q9Z0P5-2	Twf2			YES
Q9Z0R9	Fads2	YES				YES
Q9Z0U0;Q9Z0U0-2	Xpr1	YES	YES
Q9Z0V1;Q9Z0V1-2	Kcnd3	YES		YES	YES
Q9Z0V2	Kcnd2	YES	YES		YES	YES
Q9Z127	Slc7a5	YES	YES	YES	YES
Q9Z1B3	Plcb1	YES	YES	YES	YES	YES
Q9Z1G4;Q9Z1G4-2;Q9Z1G4-3	Atp6v0a1	YES	YES	YES	YES
Q9Z1L5	Cacna2d3			YES	YES	YES
Q9Z1Q2	Abhd16a			YES	YES
Q9Z1S8	Gab2	YES	YES
Q9Z218	Dpp6			YES	YES	YES
Q9Z239	Fxyd1	YES	YES		YES
Q9Z268	Rasal1	YES	YES	YES	YES		YES
Q9Z2C4	Mtmr1			YES	YES
Q9Z2D1	Mtmr2			YES
Q9Z2H2	Rgs6	YES	YES	YES	YES	YES
Q9Z2H5	Epb41l1	YES	YES	YES	YES	YES
Q9Z2Q6	Septin5			YES	YES
Q9Z2W9	Gria3			YES	YES	YES
Q9Z2Z6	Slc25a20			YES
Q9Z351-12;Q9Z351-13	Kcnq2	YES	YES			YES
S4R1M9	Osbpl10	YES	YES	YES			YES
