# Supplementary material
Source: Research Square preprint supplement (doi:10.21203/rs.3.rs-8597698/v1)
Supplement: Supplementary file 11 [file f460f47456b653fc9330bfc9.xlsx]

## Sheet: Supp. Table 3
Summary of statistical analysis
Figure	Panel	Number of sample	Test used	One / two tailed	F, t value and degrees of freedom	Post-hoc test	Significance
3e	TSAPN7 intensity	Each 5 maximum projection images of NF = 15, FR-S = 14, FR-L = 15 from each of 4 mice	One-way ANOVA		F(2, 41) = 12.21, P < 0.0001	Tukey's multiple comparison test	NF vs. FR-S, P = 0.9734, NF vs. FR-L, P = 0.0002, FR-S vs. FR-L, P = 0.0005
3g	Synaptosomal TSAPN7	NF= 4, FR-S= 4, FR-L= 4 mice	One-way ANOVA		F(2, 9) = 22.48, P = 0.0003	Tukey's multiple comparison test	NF vs. FR-S, P = 0.5517, NF vs. FR-L, P < 0.005, FR-S vs. FR-L, P < 0.001
3j	Excitatory synapse density	Each 5 maximum projection images of Cont = 36, TSPAN7-cKO = 36, TSPAN7 P172H=36 from each of 4 mice	One-way ANOVA		F (2, 141) = 1.458, P=0.2361	Tukey's multiple comparison test	Cont vs. TSPAN7-cKO, P = 0.4531, Cont vs. TSPAN7 P172H, P = 0.2278, TSPAN7-cKO vs. TSPAN7 P172H, P = 0.8955
3k	Excitatory synapse density	Each 5 maximum projection images of Cont = 36, TSPAN7-cKO = 36, TSPAN7 P172H =36 from each of 4 mice	One-way ANOVA		F (2, 141) = 5.614, P=0.045	Tukey's multiple comparison test	Cont vs. TSPAN7-cKO, P = 0.0140, Cont vs. TSPAN7 P172H, P = 0.0121, TSPAN7-cKO vs. TSPAN7 P172H, P = 0.9929
3m	Dual eGRASP density	Each 5 maximum projection images of Cont = 36, TSPAN7-cKO = 36, TSPAN7 P172H=36 from each of 4 mice	Two-way ANOVA		Experimental group × Brain region, F(2, 210) = 0.0005440, P = 0.9995, Experimental group, F(1, 210) = 0.05831, P = 0.8094, Brain region, F(2, 210) = 1.887, P = 0.1541	Tukey's multiple comparison test	NN: Cont vs. TSPAN7-cKO, P = 0.4906, Cont vs. TSPAN7 P172H, P = 0.6576, TSPAN7-cKO vs. TSPAN7 P172H, P = 0.9929 NE: Cont vs. TSPAN7-cKO, P = 0.4665, Cont vs. TSPAN7 P172H, P = 0.6628, TSPAN7-cKO vs. TSPAN7 P172H, P = 0.9885
3n	Dual eGRASP density	Each 5 maximum projection images of Cont = 36, TSPAN7-cKO = 36, TSPAN7 P172H=36 from each of 4 mice	Two-way ANOVA		Experimental group × Brain region, F(2, 105) = 4.142, P = 0.0186, Experimental group, F(1, 105) = 4.374, P = 0.0389, Brain region, F(2, 105) = 13.25, P < 0.0001, Subject, F(105, 105) = 0.7098, P = 0.9597	Tukey's multiple comparison test	EN: Cont vs. TSPAN7-cKO, P = 0.6729, Cont vs. TSPAN7 P172H, P = 0.7386, TSPAN7-cKO vs. TSPAN7 P172H, P = 0.9995 EE: Cont vs. TSPAN7-cKO, P < 0.0001, Cont vs. TSPAN7 P172H, P < 0.0001, TSPAN7-cKO vs. TSPAN7 P172H, P = 0.9999
4f	CPLX localization	Each 5 maximum projection images of NF = 15, FR-L control = 15, FR-L TSPAN7-cKO = 15 and FR-L TSPAN7 P172H = 15 from each of 4 mice	Two-way ANOVA		F(3, 56) = 8.613, P < 0.0001	Tukey's multiple comparison test	NF vs. FR-L control, P = 0.0009, NF vs. TSPAN7-cKO, P = 0.6374, NF vs. TSPAN7-P172H, P = 0.9164, FR-L control vs. TSPAN7-cKO, P = 0.0298, FR-L control vs. TSPAN7-P172H, P = 0.0001, TSPAN7-cKO vs. TSPAN7-P172H, P = 0.2687
4i	SNAP25 localization	Each 5 maximum projection images ofNF = 15, FR-L control = 15, FR-L TSPAN7-cKO = 15, FR-L TSPAN7 P172H = 15, FR-L CPLX2-cKO = 15 and FR-L TSPAN7/CPLX2-cDKO = 15 from each of 4 mice	Two-way ANOVA		F(5, 84) = 40.81, P < 0.0001	Tukey's multiple comparison test	NF vs. FR-L control, P < 0.0001, NF vs. TSPAN7-cKO, P = 0.1382, NF vs. TSPAN7-P172H, P < 0.0001, NF vs. CPLX2-cKO, P < 0.0001, NF vs. TSPAN7/CPLX2-cDKO, P = 0.0064, FR-L control vs. TSPAN7-cKO, P < 0.0001, FR-L control vs. TSPAN7-P172H, P < 0.0001, FR-L control vs. CPLX2-cKO, P < 0.0001, FR-L control vs. TSPAN7/CPLX2-cDKO, P < 0.0001, TSPAN7-cKO vs. TSPAN7-P172H, P = 0.0759, TSPAN7-cKO vs. CPLX2-…
4l	PPR	Control = 15 cells, TSPAN7-cKO = 18 cells and TSPAN7 P172H = 18 cells from 3–4 mice	Two-way ANOVA		F(2, 48) = 8.573, P = 0.0007	Tukey's multiple comparison test	Cont vs. TSPAN7-cKO, P = 0.0036, Cont vs. TSPAN7-P172H, P = 0.0011, TSPAN7-cKO vs. TSPAN7-P172H, P = 0.9102
4n	Fear conditioning	Control = 14, TSPAN7-cKO = 15 and TSPAN7 P172H = 15 mice	One-way ANOVA		F(2, 41) = 2.357, P = 0.1074	Tukey's multiple comparison test	Cont vs. TSPAN7-cKO, P = 0.2875, Cont vs. TSPAN7-P172H, P = 0.1003, TSPAN7-cKO vs. TSPAN7-P172H, P = 0.8264
4o	Cued	Control = 14, TSPAN7-cKO = 15 and TSPAN7 P172H = 15 mice	One-way ANOVA		F(2, 41) = 0.7300, P = 0.4881	Tukey's multiple comparison test	Cont vs. TSPAN7-cKO, P = 0.4614, Cont vs. TSPAN7-P172H, P = 0.8804, TSPAN7-cKO vs. TSPAN7-P172H, P = 0.7480
4p	Context	Control = 14, TSPAN7-cKO = 15 and TSPAN7 P172H = 15 mice	One-way ANOVA		F(2, 41) = 8.037, P = 0.0011	Tukey's multiple comparison test	Cont vs. TSPAN7-cKO, P = 0.0023, Cont vs. TSPAN7-P172H, P = 0.0023
Extended Data Fig. 1a	Fear conditioning test	NF= 11, FR-S= 11, FR-L= 11 mice	One-way ANOVA		F(2, 30) = 19.74, P < 0.0001	Tukey's multiple comparison test	NF vs FR-S, P < 0.0001, NF vs FR-L, P < 0.0001, FR-S vs FR-L = 0.9806
Extended Data Fig. 1c	Biotinylation activity	NF(mPFC)=6 , NF(BLA)=6 , FR-S(mPFC)=6 , FR-S(BLA)=6 , FR-L (mPFC)=6 , FR-L (BLA)=6 mice	One-way ANOVA		F(5, 30) = 86.58, P < 0.0001	Tukey's multiple comparison test	NF (mPFC) vs. NF (BLA), P >0.9999, NF (mPFC) vs. FR-S (mPFC), P<0.0001, NF (mPFC) vs. FR-L (BLA), P < 0.0001, NF (mPFC) vs. FR-L (mPFC), P < 0.0001, NF (mPFC) vs. FR-L (BLA), P < 0.0001, NF (BLA) vs. FR-S (mPFC), P < 0.0001, NF (BLA) vs. FR-L (BLA), P < 0.0001 , NF (BLA) vs. FR-L (mPFC), P < 0.0001, NF (BLA) vs. FR-L (BLA), P < 0.0001, FR-S (mPFC) vs. FR-L (BLA), P < 0.0001, FR-S (mPFC) vs. FR-L …
Extended Data Fig. 1f	Ratio of ActProX-ID+ cells	NF= 4, FR-S= 4, FR-L= 4 mice	One-way ANOVA		F(2, 42) = 24.36, P < 0.0001	Tukey's multiple comparison test	NF vs. FR-S, P < 0.0001, NF vs. FR-L, P < 0.0001, FR-S vs. FR-L, P = 0.9522
Extended Data Fig. 1g	% of cFos+ cells	NF= 4, FR-S= 4, FR-L= 4 mice	One-way ANOVA		F(2, 36) = 2.955, P = 0.0648	Tukey's multiple comparison test	NF vs. FR-S, P = 0.4073, NF vs. FR-L, P = 0.0533, FR-S vs. FR-L, P = 0.4077
Extended Data Fig. 3i	Colocalization	CFP eGRASP = 15, YFP eGRASP = 15 slices from each of 4 mice	Unpaired t test	Two-tailed	t(274) = 12.92		CFP eGRASP vs YFP eGRASP, P < 0.0001
Extended Data Fig. 4b	Expression level	Cont=4, TSPAN7-cKO=4 mice	Unpaired t test	Two-tailed	t(6) = 3.600		Cont vs TSPAN7-cKO, P=0.0114
Extended Data Fig. 4e	Excitatory synapse density	Cont = 50, TSPAN7-KO = 50, TSPAN7 P172H = 50 cells from each based on 4 independent experiments	One-way ANOVA		F(2, 147) = 51.49, P < 0.0001	Tukey's multiple comparison test	Cont vs. TSPAN7-KO, P < 0.0001, Cont vs. TSPAN7 P172H, P < 0.0001, TSPAN7-KO vs. TSPAN7 P172H, P = 0.9957
Extended Data Fig. 4f	Synapse volume (NF)	Each 5 maximum projection images of Cont = 36, TSPAN7-cKO = 36, TSPAN7 P172H=36 from each of 4 mice	One-way ANOVA		F(2, 787) = 2.141, P = 0.1183	Tukey's multiple comparison test	Cont vs. TSPAN7-cKO, P = 0.1117, Cont vs. TSPAN7 P172H, P = 0.9083, TSPAN7-cKO vs. TSPAN7 P172H, P = 0.3959
Extended Data Fig. 4g	Synapse volume (FR-L)	Each 5 maximum projection images of Cont = 36, TSPAN7-cKO = 36, TSPAN7 P172H=36 from each of 4 mice	One-way ANOVA		F(2, 735) = 1.284, P = 0.2776	Tukey's multiple comparison test	Cont vs. TSPAN7-cKO, P = 0.3004, Cont vs. TSPAN7 P172H, P = 0.4188, TSPAN7-cKO vs. TSPAN7 P172H, P = 0.9963
Extended Data Fig. 4h	Dual eGRASP volume (CFP)	Each 5 maximum projection images of Cont = 36, TSPAN7-cKO = 36, TSPAN7 P172H=36 from each of 4 mice	One-way ANOVA		F(2, 1197) = 0.7431, P = 0.4759	Tukey's multiple comparison test	Cont vs. TSPAN7-cKO, P = 0.7639, Cont vs. TSPAN7 P172H, P = 0.8641, TSPAN7-cKO vs. TSPAN7 P172H, P = 0.4448
Extended Data Fig. 4i	Dual eGRASP volume (YFP)	Each 5 maximum projection images of Cont = 36, TSPAN7-cKO = 36, TSPAN7 P172H=36 from each of 4 mice	One-way ANOVA		F(2, 1197) = 0.2358, P = 0.7900	Tukey's multiple comparison test	Cont vs. TSPAN7-cKO, P = 0.9456, Cont vs. TSPAN7 P172H, P = 0.7717, TSPAN7-cKO vs. TSPAN7 P172H, P = 0.9282
Extended Data Fig. 4j	Dual eGRASP density (CFP)	Each 5 maximum projection images of Cont = 36, TSPAN7-cKO = 36, TSPAN7 P172H=36 from each of 4 mice	One-way ANOVA		F(2, 222) = 0.02121, P = 0.9790	Tukey's multiple comparison test	Cont vs. TSPAN7-cKO, P = 0.9769, Cont vs. TSPAN7 P172H, P = 0.9941, TSPAN7-cKO vs. TSPAN7 P172H, P = 0.9943
Extended Data Fig. 5b	Biotinylation activity	Cont=4, TSPAN7-TurboID=4 mice	Unpaired t test	Two-tailed	t(6) = 12.49		Cont vs TSPAN7-TurboID, P<0.0001
Extended Data Fig. 5g	Biotinylated CPLX2	Cont, Cplx2, and Cplx2 + TSPAN7-TurboID, each based on 4 independent experiments	One-way ANOVA		F(2, 9) = 12.95, P = 0.0022	Tukey's multiple comparison test	Cont vs. Cplx2, P = 0.9859, Cont vs. CPLX2 + TSPAN7-TurboID, P = 0.0003, Cplx2 vs. CPLX2 + TSPAN7-TurboID, P = 0.0004
Extended Data Fig. 6b	TSPAN7 puncta density	Cont (-) = 20, Cont (KCl) = 20, TSPAN7 (-)= 21, TSPAN7 (KCl)= 25, TSPAN7 P172H (-)= 21, TSPAN7P172H (KCl)= 20, each based on 4 independent experiments	Two-way ANOVA		Experimental group × Brain region, F(2, 121) = 22.05, P < 0.0001, Experimental group, F(1, 121) = 19.18, P < 0.0001, Brain region, F(2, 121) = 22.88, P < 0.0001	Tukey's multiple comparison test	Cont (–) vs. TSPAN7 (–), P > 0.9999, Cont (–) vs. TSPAN7 P172H (–), P > 0.9999, Cont (–) vs. Cont (KCl), P = 0.9995, Cont (–) vs. TSPAN7 (KCl), P < 0.0001, Cont (–) vs. TSPAN7 P172H (KCl), P > 0.9999, TSPAN7 (–) vs. TSPAN7 P172H (–), P > 0.9999, TSPAN7 (–) vs. Cont (KCl), P = 0.9995, TSPAN7 (–) vs. TSPAN7 (KCl), P < 0.0001, TSPAN7 (–) vs. TSPAN7 P172H (KCl), P > 0.9999, TSPAN7 P172H (–) vs. Cont …
Extended Data Fig. 6c	CPLX2 puncta density	Cont (-) = 20, Cont (KCl) = 20, TSPAN7 (-)= 21, TSPAN7 (KCl)= 25, TSPAN7 P172H (-)= 21, TSPAN7P172H (KCl)= 20, each based on 4 independent experiments	Two-way ANOVA		Experimental group × Brain region, F(2, 121) = 27.22, P < 0.0001, Experimental group, F(1, 121) = 22.06, P < 0.0001, Brain region, F(2, 121) = 13.97, P < 0.0001	Tukey's multiple comparison test	Cont (–) vs. TSPAN7 (–), P = 0.7467, Cont (–) vs. TSPAN7 P172H (–), P = 0.9998, Cont (–) vs. Cont (KCl), P = 0.9947, Cont (–) vs. TSPAN7 (KCl), P < 0.0001, Cont (–) vs. TSPAN7 P172H (KCl), P > 0.9999, TSPAN7 (–) vs. TSPAN7 P172H (–), P = 0.8739, TSPAN7 (–) vs. Cont (KCl), P = 0.9620, TSPAN7 (–) vs. TSPAN7 (KCl), P < 0.0001, TSPAN7 (–) vs. TSPAN7 P172H (KCl), P = 0.8484, TSPAN7 P172H (–) vs. Cont …
Extended Data Fig. 6d	TSPAN7-CPLX2 colocalization	Cont (-) = 20, Cont (KCl) = 20, TSPAN7 (-)= 21, TSPAN7 (KCl)= 25, TSPAN7 P172H (-)= 21, TSPAN7P172H (KCl)= 20, each based on 4 independent experiments	Two-way ANOVA		Experimental group × Brain region, F(2, 121) = 26.68, P < 0.0001, Experimental group, F(1, 121) = 26.49, P < 0.0001, Brain region, F(2, 121) = 24.79, P < 0.0001	Tukey's multiple comparison test	Cont (–) vs. TSPAN7 (–), P > 0.9999, Cont (–) vs. TSPAN7 P172H (–), P > 0.9999, Cont (–) vs. Cont (KCl), P > 0.9999, Cont (–) vs. TSPAN7 (KCl), P < 0.0001, Cont (–) vs. TSPAN7 P172H (KCl), P > 0.9999, TSPAN7 (–) vs. TSPAN7 P172H (–), P > 0.9999, TSPAN7 (–) vs. Cont (KCl), P > 0.9999, TSPAN7 (–) vs. TSPAN7 (KCl), P < 0.0001, TSPAN7 (–) vs. TSPAN7 P172H (KCl), P > 0.9999, TSPAN7 P172H (–) vs. Cont …
Extended Data Fig. 6h	SNARE complex	Cont, Cplx2, Cplx2 + TSPAN7, and Cplx2 + TSPAN7 P172H, each based on 4 independent experiments	Two-way ANOVA		Experimental group × Brain region, F(3, 24) = 4.668, P = 0.0105, Experimental group, F(1, 24) = 9.832, P = 0.0045, Brain region, F(3, 24) = 5.394, P = 0.0056	Tukey's multiple comparison test	Cont (–) vs. CPLX2 (–), P = 0.9997, Cont (–) vs. CPLX2 + TSPAN7 (–), P > 0.9999, Cont (–) vs. CPLX2 + TSPAN7 P172H (–), P > 0.9999, Cont (–) vs. Cont (KCl), P = 0.9993, Cont (–) vs. CPLX2 (KCl), P = 0.9750, Cont (–) vs. CPLX2 + TSPAN7 (KCl), P = 0.0007, Cont (–) vs. CPLX2 + TSPAN7 P172H (KCl), P = 0.9997, CPLX2 (–) vs. CPLX2 + TSPAN7 (–), P > 0.9999, CPLX2 (–) vs. CPLX2 + TSPAN7 P172H (–), P = 0.…
Extended Data Fig. 6j	SNARE complex	Cont (–) = 4, Cont (KCl) = 4, TSPAN7 (–) = 4, TSPAN7 (KCl) = 4, TSPAN7 P172H (–) = 4 and TSPAN7 P172H (KCl) = 4 independent experiments	Two-way ANOVA		Experimental group × Brain region, F(4, 50) = 4.833, P = 0.0023, Experimental group, F(1, 50) = 3.636, P = 0.0623, Brain region, F(4, 50) = 10.12, P < 0.0001	Tukey's multiple comparison test	Cont (–) vs. TSPAN7-KO (–), P = 0.9643, Cont (–) vs. TSPAN7-P172H (–), P > 0.9999, Cont (–) vs. CPLX2-KO (–), P > 0.9999, Cont (–) vs. TSPAN7/CPLX2-DKO (–), P > 0.9999, Cont (–) vs. Cont (KCl), P = 0.0007, Cont (–) vs. TSPAN7-KO (KCl), P = 0.9608, Cont (–) vs. TSPAN7-P172H (KCl), P > 0.9999, Cont (–) vs. CPLX2-KO (KCl), P > 0.9999, Cont (–) vs. TSPAN7/CPLX2-DKO (KCl), P > 0.9999, TSPAN7-KO (–) vs…
Extended Data Fig. 6m	LumSynt1 initensity	Cont = 60, TSPAN7-KO = 60, TSPAN7 P172H = 60, CPLX2-KO = 60 and TSPAN7/CPLX2-DKO = 60 cells from 4 independent experiments	Two-way ANOVA		F(4, 295) = 6.757, P < 0.0001	Tukey's multiple comparison test	Cont vs. TSPAN7-KO, P = 0.0032, Cont vs. TSPAN7-P172H, P < 0.0001, Cont vs. CPLX2-KO, P = 0.0007, Cont vs. TSPAN7/CPLX2-DKO, P = 0.0204, TSPAN7-KO vs. TSPAN7-P172H, P = 0.7775, TSPAN7-KO vs. CPLX2-KO, P = 0.9943, TSPAN7-KO vs. TSPAN7/CPLX2-DKO, P = 0.9809, TSPAN7-P172H vs. CPLX2-KO, P = 0.9446, TSPAN7-P172H vs. TSPAN7/CPLX2-DKO, P = 0.4283, CPLX2-KO vs. TSPAN7/CPLX2-DKO, P = 0.8717
Extended Data Fig. 7b	SNAP25 localization	Each 5 maximum projection images of CFP eGRASP = 72, YFP eGRASP = 72 from each of 4 mice	Unpaired t test	Two-tailed	t(142) = 3.069		CFP eGRASP vs YFP eGRASP, P = 0.0026
Extended Data Fig. 7d	sEPSC amplitude	Control = 24 cells, TSPAN7-cKO = 40 cells and TSPAN7 P172H = 16 cells from 3–4 mice	Two-way ANOVA		F(2, 77) = 1.140, P = 0.3250	Tukey's multiple comparison test	Cont vs. TSPAN7-cKO, P = 0.8669, Cont vs. TSPAN7-P172H, P = 0.3032, TSPAN7-cKO vs. TSPAN7-P172H, P = 0.4707
Extended Data Fig. 7e	sFPSC frequency	Control = 24 cells, TSPAN7-cKO = 40 cells and TSPAN7 P172H = 16 cells from 3–4 mice	Two-way ANOVA		F(2, 77) = 1.700, P = 0.1894	Tukey's multiple comparison test	Cont vs. TSPAN7-cKO, P = 0.6573, Cont vs. TSPAN7-P172H, P = 0.1625, TSPAN7-cKO vs. TSPAN7-P172H, P = 0.4294
Extended Data Fig. 8b	OFT total distance	Control = 14, TSPAN7-cKO = 15 and TSPAN7 P172H = 20 mice	One-way ANOVA		F(2, 46) = 4.230, P = 0.0206	Tukey's multiple comparison test	Cont vs. TSPAN7-cKO, P = 0.2769, Cont vs. TSPAN7-P172H, P = 0.0151, TSPAN7-cKO vs. TSPAN7-P172H, P = 0.4142
Extended Data Fig. 8c	OFT time in center	Control = 14, TSPAN7-cKO = 15 and TSPAN7 P172H = 20 mice	One-way ANOVA		F(2, 46) = 2.844, P = 0.0685	Tukey's multiple comparison test	Cont vs. TSPAN7-cKO, P = 0.2266, Cont vs. TSPAN7-P172H, P = 0.0401
Extended Data Fig. 8d	OFT time spent immobile	Control = 14, TSPAN7-cKO = 15 and TSPAN7 P172H = 20 mice	One-way ANOVA		F(2, 46) = 3.757, P = 0.0308	Tukey's multiple comparison test	Cont vs. TSPAN7-cKO, P = 0.2358, Cont vs. TSPAN7-P172H, P = 0.0162
Extended Data Fig. 8e	OFT mean velocity	Control = 14, TSPAN7-cKO = 15 and TSPAN7 P172H = 20 mice	One-way ANOVA		F(2, 46) = 4.670, P = 0.0142	Tukey's multiple comparison test	Cont vs. TSPAN7-cKO, P = 0.1573, Cont vs. TSPAN7-P172H, P = 0.0071
Extended Data Fig. 8g	EPM total distance	Control = 14, TSPAN7-cKO = 14 and TSPAN7 P172H = 19 mice	One-way ANOVA		F(2, 44) = 0.1811, P = 0.8350	Tukey's multiple comparison test	Cont vs. TSPAN7-cKO, P = 0.7876, Cont vs. TSPAN7-P172H, P = 0.8532
Extended Data Fig. 8h	EPM time in open arm	Control = 14, TSPAN7-cKO = 14 and TSPAN7 P172H = 19 mice	One-way ANOVA		F(2, 44) = 0.1940, P = 0.8243	Tukey's multiple comparison test	Cont vs. TSPAN7-cKO, P = 0.8571, Cont vs. TSPAN7-P172H, P = 0.9906
Extended Data Fig. 8i	EPM open-arm entries	Control = 14, TSPAN7-cKO = 14 and TSPAN7 P172H = 19 mice	One-way ANOVA		F(2, 44) = 0.1819, P = 0.8343	Tukey's multiple comparison test	Cont vs. TSPAN7-cKO, P = 0.9191, Cont vs. TSPAN7-P172H, P = 0.7678
Extended Data Fig. 8j	EPM open-arm entries ratio	Control = 14, TSPAN7-cKO = 14 and TSPAN7 P172H = 19 mice	One-way ANOVA		F(2, 44) = 0.01095, P = 0.9891	Tukey's multiple comparison test	Cont vs. TSPAN7-cKO, P = 0.9875, Cont vs. TSPAN7-P172H, P > 0.9999
Extended Data Fig. 8m	3CT time in the cage-vicinity zone	Control = 14, TSPAN7-cKO = 15 and TSPAN7 P172H = 20 mice	Two-way ANOVA		Interaction, F(2, 92) = 0.6365, P = 0.5314; Row factor, F(1, 92) = 95.27, P < 0.0001; Column factor, F(2, 92) = 2.388, P = 0.0975	Šídák's multiple comparisons test	Stranger mouse vs. Empty: sgCont, P < 0.0001; sgTspan7, P < 0.0001; sgTspan7 + P172H, P < 0.0001
Extended Data Fig. 8n	Social interaction score in the cage-vicinity zone	Control = 14, TSPAN7-cKO = 15 and TSPAN7 P172H = 20 mice	One-way ANOVA		F(2, 46) = 0.8113, P = 0.4505	Tukey's multiple comparison test	Cont vs. TSPAN7-cKO, P = 0.8730, Cont vs. TSPAN7-P172H, P = 0.3598
Extended Data Fig. 8o	3CT Time in the sniffing zone	Control = 14, TSPAN7-cKO = 15 and TSPAN7 P172H = 20 mice	Two-way ANOVA		Interaction, F(2, 92) = 0.3841, P = 0.6821; Row factor, F(1, 92) = 267.1, P < 0.0001; Column factor, F(2, 92) = 1.409, P = 0.2497	Šídák's multiple comparisons test	Stranger mouse vs. Empty: sgCont, P < 0.0001; sgTspan7, P < 0.0001; sgTspan7 + P172H, P < 0.0001
Extended Data Fig. 8p	Social interaction score in the sniffing zone	Control = 14, TSPAN7-cKO = 15 and TSPAN7 P172H = 20 mice	One-way ANOVA		F(2, 46) = 0.2318, P = 0.7940	Tukey's multiple comparison test	Cont vs. TSPAN7-cKO, P = 0.7562, Cont vs. TSPAN7-P172H, P = 0.9921
Extended Data Fig. 8q	3CT Sniffing / cage-vicinity	Control = 14, TSPAN7-cKO = 15 and TSPAN7 P172H = 20 mice	Two-way ANOVA		Interaction, F(2, 92) = 3.117, P = 0.0490; Row factor, F(1, 92) = 79.29, P < 0.0001; Column factor, F(2, 92) = 1.463, P = 0.2369	Šídák's multiple comparisons test	Stranger mouse vs. Empty: sgCont, P < 0.0001; sgTspan7, P = 0.0002; sgTspan7 + P172H, P < 0.0001
Extended Data Fig. 8r	Sniffing/Vicinity social interaction ratio	Control = 14, TSPAN7-cKO = 15 and TSPAN7 P172H = 20 mice	One-way ANOVA		F(2, 46) = 3.908, P = 0.0271	Tukey's multiple comparison test	Cont vs. TSPAN7-cKO, P = 0.0844, Cont vs. TSPAN7-P172H, P = 0.0170
